# Supplementary material for: Matrix Screen Identifies Synergistic Combination of PARP Inhibitors and Nicotinamide Phosphoribosyltransferase (NAMPT) Inhibitors in Ewing Sarcoma
Source: Oxford University Press journal article supplement (doi:10.1158/1078-0432.ccr-17-1121), 2017-09-12
Supplement: 10780432ccr171121-sup-182099_3_supp_4237854_bvbhdf.xlsx [file 10780432ccr171121-sup-182099_3_supp_4237854_bvbhdf.xlsx]

## Sheet: TC71
Sample_ID	name	target	moa	protocol	Sample_data_type	CCLASS	CCLASS2	LAC50	HILL	INF	ZERO	MAXR	NPT	FAUC	TAUC	R2	PHILL	DATA0	DATA1	DATA2	DATA3	DATA4	DATA5	DATA6	DATA7	DATA8	DATA9	DATA10	C0	C1	C2	C3	C4	C5	C6	C7	C8	C9	C10	name	target	moa	smi
NCGC00013226-15	Trifluoperazine hydrochloride	DRD2	Nav1.4 (SkM1) Sodium Channel Blockers;Nav1.7 (PN1/hNE-Na) Sodium Channel Blockers	s-ewing-osteo-TC71-1	activity	4	-1.1	-4.97921	4.95492	10.6307	127.141	8.79925	11	529.375	530.482	0.988812	1.0126e-06	123.262	128.832	120.985	127.644	124.506	123.21	138.093	126.469	127.222	28.1929	8.79925	0.000780415	0.00234124	0.00702378	0.0210713	0.0632139	0.189642	0.568925	1.70678	5.12033	15.361	46.0829	Trifluoperazine hydrochloride	DRD2	Nav1.4 (SkM1) Sodium Channel Blockers;Nav1.7 (PN1/hNE-Na) Sodium Channel Blockers	CN1CCN(CCCN2C3=C(SC4=C2C=C(C=C4)C(F)(F)F)C=CC=C3)CC1
NCGC00013724-01	Scopolamine methylbromide	NA	Muscarinic Antagonists	s-ewing-osteo-TC71-1	activity	1.3	4	-7.62921	1.96734	113.713	98.3419	116.366	11	523.842	522.745	0.773735	0.0433512	100.213	100.976	92.8204	107.909	110.866	108.224	117.795	114.134	116.428	109.539	116.366	0.000780415	0.00234124	0.00702378	0.0210713	0.0632139	0.189642	0.568925	1.70678	5.12033	15.361	46.0829	Scopolamine methylbromide	NA	Muscarinic Antagonists	[Br-].OC[C@H](c1ccccc1)C(=O)O[C@@H]2C[C@@H]3[C@H]4O[C@H]4[C@H](C2)[N+]3(C)C
NCGC00013822-03	NSC-75503	SHH	Hedgehog antagonist	s-ewing-osteo-TC71-1	activity	2.3	-3	-4.67921	4.50447	95.692	130.806	96.6705	11	616.025	619.449	0.74516	0.0592622	119.768	121.518	128.173	134.003	130.585	140.261	134.975	134.88	135.276	123.237	96.6705	0.000780415	0.00234124	0.00702378	0.0210713	0.0632139	0.189642	0.568925	1.70678	5.12033	15.361	46.0829	NSC-75503	SHH	Hedgehog antagonist	S1C(=C(C2=CC=NC=C2)C(=C1C3=CC=NC=C3)C4=CC=NC=C4)C5=CC=NC=C5
NCGC00013841-08	Cyclobenzaprine hydrochloride	HTR2A	5-HT2A Antagonists?	s-ewing-osteo-TC71-1	activity	2.1	-2.2	-4.67921	1.88512	88.8742	138.03	92.7379	11	642.294	640.952	0.921569	0.00154499	141.035	142.432	139.258	134.768	133.669	135.149	142.79	135.417	131.213	124.905	92.7379	0.000780415	0.00234124	0.00702378	0.0210713	0.0632139	0.189642	0.568925	1.70678	5.12033	15.361	46.0829	Cyclobenzaprine hydrochloride	HTR2A	5-HT2A Antagonists?	CN(C)CCC=C1C2=C(C=CC=C2)\C=C/C3=C1C=CC=C3
NCGC00014352-03	GANT61	SHH	Hedgehog pathway inhibitor	s-ewing-osteo-TC71-1	activity	2.3	-2.2	-4.72921	3.06545	57.8743	118.298	56.7542	11	542.233	543.904	0.857737	0.0111108	108.008	108.705	112.262	119.73	115.98	120.822	129.447	132.56	117.326	96.543	56.7542	0.000780415	0.00234124	0.00702378	0.0210713	0.0632139	0.189642	0.568925	1.70678	5.12033	15.361	46.0829	GANT61	SHH	Hedgehog pathway inhibitor	CN(C)C1=C(CN2CCCN(CC3=C(C=CC=C3)N(C)C)C2C4=CC=NC=C4)C=CC=C1
NCGC00014650-03	Ansamitocin P3	TUBB	Tubulin polymerization inhibitor	s-ewing-osteo-TC71-1	activity	4	4	NA	NA	NA	NA	23.8602	11	NA	130.166	NA	NA	28.8961	29.5065	27.1883	25.4922	29.0659	25.1646	28.6979	28.2776	26.031	25.2404	23.8602	0.000780415	0.00234124	0.00702378	0.0210713	0.0632139	0.189642	0.568925	1.70678	5.12033	15.361	46.0829	Ansamitocin P3	TUBB	Tubulin polymerization inhibitor	CO[C@@H]1/C=C/C=C(C)/CC2=CC(=C(Cl)C(=C2)OC)N(C)C(=O)C[C@H](OC(=O)C(C)C)[C@]3(C)O[C@@H]3[C@H](C)[C@@H]4C[C@@]1(O)NC(=O)O4
NCGC00014670-16	Domperidone	DRD1	Dopamine Receptor Antagonist	s-ewing-osteo-TC71-1	activity	2.3	4	-4.62921	1.96734	90.599	113.417	93.5687	11	536.333	537.484	0.498966	0.260225	108.417	115.899	108.616	112.363	103.991	124.648	121.788	114.436	108.725	108.106	93.5687	0.000780415	0.00234124	0.00702378	0.0210713	0.0632139	0.189642	0.568925	1.70678	5.12033	15.361	46.0829	Domperidone	DRD1	Dopamine Receptor Antagonist	ClC1=CC2=C(C=C1)N(C3CCN(CCCN4C(=O)NC5=C4C=CC=C5)CC3)C(=O)N2
NCGC00014873-04	HLI-373989	MDM2	MDM2 (hdm2) Inhibitor	s-ewing-osteo-TC71-1	activity	4	-2.1	-4.97921	0.9	-31.2624	135.024	1.78167	11	517.612	516.726	0.992129	2.539e-07	135.024	133.544	130.579	131.929	135.771	133.1	123.433	113.394	69.6836	43.0391	1.78167	0.000780415	0.00234124	0.00702378	0.0210713	0.0632139	0.189642	0.568925	1.70678	5.12033	15.361	46.0829	HLI-373989	MDM2	MDM2 (hdm2) Inhibitor	CN(C)CCCN\C1=C\2C(=O)N(C)C(=O)\N=C2N(C)C3=C1C=CC=C3
NCGC00014891-03	RG-108	DNMT1	DNA Methyltransferase (DNMT) Inhibitor	s-ewing-osteo-TC71-1	activity	1.3	1.4	-8.51797	2.63843	113.907	96.9073	111.084	11	557.136	557.348	0.777234	0.0417979	98.9073	109.99	110.942	112.427	116.101	113.521	115.589	110.484	115.792	118.223	111.084	0.00156083	0.00468253	0.0140476	0.0421426	0.126428	0.379284	1.13785	3.41355	10.2407	30.722	92.1659	RG-108	DNMT1	DNA Methyltransferase (DNMT) Inhibitor	OC(=O)[C@H](CC1=C[NH]C2=C1C=CC=C2)N3C(=O)C4=C(C=CC=C4)C3=O
NCGC00014911-01	Cucurbitacin I	JAK2	Jak2 inhibitor	s-ewing-osteo-TC71-1	activity	4	-1.1	-6.67921	0.9	6.8107	120.523	3.02115	11	308.84	312.287	0.969455	4.90965e-05	114.478	112.862	123.911	111.861	99.2934	50.2172	41.3174	35.7467	15.2686	5.07212	3.02115	0.000780415	0.00234124	0.00702378	0.0210713	0.0632139	0.189642	0.568925	1.70678	5.12033	15.361	46.0829	Cucurbitacin I	JAK2	Jak2 inhibitor	CC(C)(O)\C=C/C(=O)[C@](C)(O)[C@H]1[C@H](O)C[C@]2(C)[C@@H]3C\C=C4/[C@@H](/C=C(/O)C(=O)C4(C)C)[C@]3(C)C(=O)C[C@@]12C
NCGC00014925-07	Topotecan HCl	TOP1	DNA Topoisomerase I Inhibitors	s-ewing-osteo-TC71-1	activity	4	-1.1	-7.42921	2.53343	6.27067	134.76	3.5024	11	245.782	248.148	0.99811	9e-10	129.333	139.184	133.857	110.836	35.042	7.31014	5.87997	6.20744	8.22579	6.87345	3.5024	0.000780415	0.00234124	0.00702378	0.0210713	0.0632139	0.189642	0.568925	1.70678	5.12033	15.361	46.0829	Topotecan HCl	TOP1	DNA Topoisomerase I Inhibitors	CC[C@@]1(O)C(=O)OC\C2=C1\C=C3/N(CC4=CC5=C(C=CC(=C5CN(C)C)O)N=C34)C2=O
NCGC00014926-03	Carboxyamidotriazole	NA	Ca2+ channel blocker	s-ewing-osteo-TC71-1	activity	2.1	-2.1	-4.72921	4.09497	24.2362	139.025	32.45	11	620.243	622.734	0.977199	1.60958e-05	135.122	143.981	143.601	139.571	142.948	127.871	140.945	136.58	137.708	105.789	32.45	0.000780415	0.00234124	0.00702378	0.0210713	0.0632139	0.189642	0.568925	1.70678	5.12033	15.361	46.0829	Carboxyamidotriazole	NA	Ca2+ channel blocker	NC(=O)C1=C(N)[N](CC2=CC(=C(C(=C2)Cl)C(=O)C3=CC=C(Cl)C=C3)Cl)N=N1
NCGC00015004-11	Amoxapine	HTR2A	5-HT2A Antagonists?	s-ewing-osteo-TC71-1	activity	2.1	-2.2	-4.77921	1	60.4156	124.777	73.7025	11	560.427	560.991	0.931864	0.000941812	124.806	125.892	123.323	126.085	120.838	133.993	117.304	116.525	108.259	98.8362	73.7025	0.000780415	0.00234124	0.00702378	0.0210713	0.0632139	0.189642	0.568925	1.70678	5.12033	15.361	46.0829	Amoxapine	HTR2A	5-HT2A Antagonists?	ClC1=CC\2=C(OC3=C(C=CC=C3)\N=C2N4CCNCC4)C=C1
NCGC00015026-14	Atropine	CHRM1	M1 Muscarinic acetylcholine receptor Antagonists	s-ewing-osteo-TC71-1	activity	2.3	-2.4	-4.72921	4.95492	101.217	125.147	101.622	11	591.882	593.948	0.772592	0.0439302	121.147	123.118	122.347	132.112	131.192	124.439	121.351	122.933	129.767	118.667	101.622	0.000780415	0.00234124	0.00702378	0.0210713	0.0632139	0.189642	0.568925	1.70678	5.12033	15.361	46.0829	Atropine	CHRM1	M1 Muscarinic acetylcholine receptor Antagonists	CN1C2CCC1CC(C2)OC(=O)C(CO)C3=CC=CC=C3
NCGC00015034-02	INO-1001	PARP1	PARP Inhibitor	s-ewing-osteo-TC71-1	activity	5	4	NA	NA	NA	NA	132.29	11	NA	603.52	NA	NA	120.689	125.495	121.23	127.311	123.242	123.5	128.867	122.658	133.969	122.335	132.29	0.000780415	0.00234124	0.00702378	0.0210713	0.0632139	0.189642	0.568925	1.70678	5.12033	15.361	46.0829	INO-1001	PARP1	PARP Inhibitor	NC(=O)C1=CC(=CC=C1)N
NCGC00015036-08	Amantadine hydrochloride	DRD1	Dopamine Receptor Agonist	s-ewing-osteo-TC71-1	activity	4	-2.1	-4.57921	4.09497	18.547	115.115	27.7338	11	524.682	524.083	0.964716	8.46165e-05	116.069	113.419	109.415	115.507	107.217	115.799	115.524	115.638	127.27	104.677	27.7338	0.000780415	0.00234124	0.00702378	0.0210713	0.0632139	0.189642	0.568925	1.70678	5.12033	15.361	46.0829	Amantadine hydrochloride	DRD1	Dopamine Receptor Agonist	NC12CC3CC(CC(C3)C1)C2
NCGC00015038-08	Aminopterin	DHFR	Dihydrofolate Reductase (DHFR) Inhibitors	s-ewing-osteo-TC71-1	activity	4	-1.1	-7.87921	4.95492	28.0327	115.421	27.8121	11	240.989	238.936	0.993325	1.325e-07	120.983	108.89	112.227	34.0065	29.5934	25.3551	25.9207	26.9685	30.3415	31.021	27.8121	0.000780415	0.00234124	0.00702378	0.0210713	0.0632139	0.189642	0.568925	1.70678	5.12033	15.361	46.0829	Aminopterin	DHFR	Dihydrofolate Reductase (DHFR) Inhibitors	NC1=NC2=NC=C(CNC3=CC=C(C=C3)C(=O)NC(CCC(O)=O)C(O)=O)N=C2C(=N1)N
NCGC00015049-18	Apigenin	CYP2C9	Cyp2C9 Inhibitor	s-ewing-osteo-TC71-1	activity	4	-2.1	-4.67921	4.09497	-3.4313	144.212	8.43654	11	638.556	641.163	0.969405	4.94022e-05	146.435	137.579	145.556	148.501	142.7	145.491	156.604	149.112	128.104	112.108	8.43654	0.000780415	0.00234124	0.00702378	0.0210713	0.0632139	0.189642	0.568925	1.70678	5.12033	15.361	46.0829	Apigenin	CYP2C9	Cyp2C9 Inhibitor	OC1=CC=C(C=C1)\C2=C\C(=O)C3=C(O2)C=C(O)C=C3O
NCGC00015054-06	Tacrine	ACHE	Acetylcholinesterase Inhibitors	s-ewing-osteo-TC71-1	activity	2.3	-2.2	-4.72921	1.50949	94.8335	137.132	98.0402	11	638.12	638.481	0.831857	0.0185342	138.123	137.209	136.559	134.011	142.952	136.762	134.896	141.743	121.852	126.848	98.0402	0.000780415	0.00234124	0.00702378	0.0210713	0.0632139	0.189642	0.568925	1.70678	5.12033	15.361	46.0829	Tacrine	ACHE	Acetylcholinesterase Inhibitors	Nc1c3ccccc3nc2CCCCc12
NCGC00015060-19	Azathioprine	NA	immunosuppressant	s-ewing-osteo-TC71-1	activity	4	-1.1	-5.92921	1.34431	6.71012	106.979	7.54823	11	350.707	349.486	0.989036	9.354e-07	112.311	101.939	98.6755	114.2	106.198	99.598	78.0221	45.9432	15.3014	12.1199	7.54823	0.000780415	0.00234124	0.00702378	0.0210713	0.0632139	0.189642	0.568925	1.70678	5.12033	15.361	46.0829	Azathioprine	NA	immunosuppressant	C[N]1C=NC(=C1SC2=C3[NH]C=NC3=NC=N2)[N+]([O-])=O
NCGC00015061-12	Aciclovir	NA	DNA Polymerase Inhibitors	s-ewing-osteo-TC71-1	activity	5	4	NA	NA	NA	NA	125.375	11	NA	610.742	NA	NA	126.377	130.277	127.113	120.561	135.813	127.896	109.943	132.817	123.134	137.316	125.375	0.000780415	0.00234124	0.00702378	0.0210713	0.0632139	0.189642	0.568925	1.70678	5.12033	15.361	46.0829	Aciclovir	NA	DNA Polymerase Inhibitors	N\C1=N\C2=C(N=C[N]2COCCO)C(=O)N1
NCGC00015067-13	Aspirin	NA	non-steroidal antiinflammatory	s-ewing-osteo-TC71-1	activity	4	-2.1	-4.72921	1.96734	-14.7297	126.165	3.45017	11	540.554	537.641	0.989563	7.711e-07	133.307	122.606	127.085	126.423	131.985	125.871	121.579	122.57	110.394	69.6964	3.45017	0.000780415	0.00234124	0.00702378	0.0210713	0.0632139	0.189642	0.568925	1.70678	5.12033	15.361	46.0829	Aspirin	NA	non-steroidal antiinflammatory	CC(=O)OC1=C(C=CC=C1)C(O)=O
NCGC00015075-07	Arecoline	NA	Muscarinic receptor Agonists	s-ewing-osteo-TC71-1	activity	2.3	4	-4.62921	0.8	83.204	121.173	91.7822	11	560.698	560.332	0.698774	0.0900104	124.673	122.035	120.565	114.441	119.762	123.119	125.998	110.514	107.874	115.048	91.7822	0.000780415	0.00234124	0.00702378	0.0210713	0.0632139	0.189642	0.568925	1.70678	5.12033	15.361	46.0829	Arecoline	NA	Muscarinic receptor Agonists	COC(=O)\C1=C\CCN(C)C1
NCGC00015086-03	Acetylcysteine	NFKB1	NF-kappaB Activation Inhibitor	s-ewing-osteo-TC71-1	activity	1.3	4	-8.07921	1.75295	127.666	119.655	127.308	11	605.367	605.782	0.364471	0.381431	120.166	119.323	124.327	122.802	135.947	125.043	133.613	125.019	121.122	129.273	127.308	0.000780415	0.00234124	0.00702378	0.0210713	0.0632139	0.189642	0.568925	1.70678	5.12033	15.361	46.0829	Acetylcysteine	NFKB1	NF-kappaB Activation Inhibitor	CC(=O)NC(CS)C(O)=O
NCGC00015089-08	Amiloride	SCNN1D	Epithelial Sodium Channels (ENaC) Blocker	s-ewing-osteo-TC71-1	activity	1.3	4	-7.57921	1.71374	127.043	114.653	122.692	11	591.704	592.547	0.785875	0.0373755	116.543	113.302	114.543	121.548	122.113	130.554	124.083	129.954	130.717	126.381	122.692	0.000780415	0.00234124	0.00702378	0.0210713	0.0632139	0.189642	0.568925	1.70678	5.12033	15.361	46.0829	Amiloride	SCNN1D	Epithelial Sodium Channels (ENaC) Blocker	Clc1nc(C(=O)NC(=N)N)c(N)nc1N
NCGC00015092-09	Aminocaproic acid	SERPINE1	Plasminogen Activator Inhibitor (PAI-1) Inhibitor	s-ewing-osteo-TC71-1	activity	2.3	-3	-4.52921	4.09497	87.5005	122.766	92.2315	11	580.689	580.174	0.821599	0.02211	125.766	127.357	122.774	112.693	121.124	125.428	122.533	128.266	119.356	120.608	92.2315	0.000780415	0.00234124	0.00702378	0.0210713	0.0632139	0.189642	0.568925	1.70678	5.12033	15.361	46.0829	Aminocaproic acid	SERPINE1	Plasminogen Activator Inhibitor (PAI-1) Inhibitor	NCCCCCC(O)=O
NCGC00015096-11	Amiodarone hydrochloride	NA	Muscarinic M3 Receptor Ligand	s-ewing-osteo-TC71-1	activity	4	-1.1	-5.07921	4.95492	-1.6483	124.214	0.154857	11	500.332	498.239	0.987126	1.7539e-06	128.952	116.845	118.904	124.85	121.81	135.499	129.446	117.629	112.265	2.44622	0.154857	0.000780415	0.00234124	0.00702378	0.0210713	0.0632139	0.189642	0.568925	1.70678	5.12033	15.361	46.0829	Amiodarone hydrochloride	NA	Muscarinic M3 Receptor Ligand	CCCCC1=C(C(=O)C2=CC(=C(OCCN(CC)CC)C(=C2)I)I)C3=C(O1)C=CC=C3
NCGC00015100-14	Altretamine	NA	Antineoplastic Agent	s-ewing-osteo-TC71-1	activity	1.1	-2.4	-5.97921	0.3	108.921	139.051	116.303	11	610.627	609.65	0.900568	0.00349522	139.551	135.04	130.956	128.899	128.706	128.161	126.588	126.638	120.524	115.693	116.303	0.000780415	0.00234124	0.00702378	0.0210713	0.0632139	0.189642	0.568925	1.70678	5.12033	15.361	46.0829	Altretamine	NA	Antineoplastic Agent	CN(C)C1=NC(=NC(=N1)N(C)C)N(C)C
NCGC00015110-12	Aminoglutethimide	CYP19A1	Aromatase Inhibitor	s-ewing-osteo-TC71-1	activity	1.3	4	-4.92921	0.4	105.931	127.249	111.484	11	588.36	587.996	0.597697	0.171927	129.249	129.534	119.457	130.909	119.958	121.477	126.953	118.797	118.929	117.725	111.484	0.000780415	0.00234124	0.00702378	0.0210713	0.0632139	0.189642	0.568925	1.70678	5.12033	15.361	46.0829	Aminoglutethimide	CYP19A1	Aromatase Inhibitor	CCC1(CCC(=O)NC1=O)C2=CC=C(N)C=C2
NCGC00015116-10	Aniracetam	NA	neuroprotective drug	s-ewing-osteo-TC71-1	activity	1.3	4	-5.22921	2.40638	113.204	129.284	117.431	11	606.486	606.594	0.769202	0.0457761	128.284	130.97	133.854	124.198	129.704	132.605	125.809	129.542	123.634	109.468	117.431	0.000780415	0.00234124	0.00702378	0.0210713	0.0632139	0.189642	0.568925	1.70678	5.12033	15.361	46.0829	Aniracetam	NA	neuroprotective drug	O=C2CCCN2C(=O)c1ccc(OC)cc1
NCGC00015121-16	Phenoxybenzamine hydrochloride	NA	adrenergenic receptor antagaonist	s-ewing-osteo-TC71-1	activity	1.1	1.4	-7.47921	1	124.606	106.988	81.1722	11	570.056	569.678	0.909529	0.0048861	109.606	107.42	107.008	116.854	119.144	119.689	123.879	123.406	128.045	123.07	81.1722	0.000780415	0.00234124	0.00702378	0.0210713	0.0632139	0.189642	0.568925	1.70678	5.12033	15.361	46.0829	Phenoxybenzamine hydrochloride	NA	adrenergenic receptor antagaonist	CC(COC1=CC=CC=C1)N(CCCl)CC2=CC=CC=C2
NCGC00015122-09	Bupropion hydrochloride	SLC6A3	Dopamine Transporter (DAT) Inhibitor	s-ewing-osteo-TC71-1	activity	1.3	4	-6.72921	2.40638	115.317	102.817	94.3394	11	524.56	522.072	0.616093	0.182735	100.317	106.728	101.185	103.779	103.024	108.069	118.389	123.095	113.406	105.687	94.3394	0.000780415	0.00234124	0.00702378	0.0210713	0.0632139	0.189642	0.568925	1.70678	5.12033	15.361	46.0829	Bupropion hydrochloride	SLC6A3	Dopamine Transporter (DAT) Inhibitor	CC(NC(C)(C)C)C(=O)C1=CC=CC(=C1)Cl
NCGC00015144-04	O6-Benzylguanine	MGMT	O6-Alkylguanine-DNA Alkyltransferase (MGMT) Inhibitors	s-ewing-osteo-TC71-1	activity	4	-2.1	-4.87921	3.98997	21.2107	126.294	21.4137	11	544.916	546.216	0.985079	3.1203e-06	122.907	123.233	122.312	121.564	124.907	130.788	126.834	127.874	134.312	59.2401	21.4137	0.000780415	0.00234124	0.00702378	0.0210713	0.0632139	0.189642	0.568925	1.70678	5.12033	15.361	46.0829	O6-Benzylguanine	MGMT	O6-Alkylguanine-DNA Alkyltransferase (MGMT) Inhibitors	NC1=NC(=C2N=C[NH]C2=N1)OCC3=CC=CC=C3
NCGC00015147-09	Benzamil	SCNN1D	Epithelial Sodium Channels (ENaC) Blockers	s-ewing-osteo-TC71-1	activity	2.1	-3	-4.47921	4.95492	37.0355	114.23	49.8382	11	530.582	530.225	0.967542	6.18255e-05	111.722	114.196	108.426	118.54	117.875	113.174	119.684	110.516	111.349	113.059	49.8382	0.000780415	0.00234124	0.00702378	0.0210713	0.0632139	0.189642	0.568925	1.70678	5.12033	15.361	46.0829	Benzamil	SCNN1D	Epithelial Sodium Channels (ENaC) Blockers	N\C(NCC1=CC=CC=C1)=N/C(=O)C2=NC(=C(N)N=C2N)Cl
NCGC00015148-07	Buthionine sulfoximine	GSS	Glutathione synthesis inhibitor	s-ewing-osteo-TC71-1	activity	5	4	NA	NA	NA	NA	126.846	11	NA	594.022	NA	NA	121.266	111.721	123.335	121.987	128.111	124.551	124.397	123.469	137.396	116.569	126.846	0.000780415	0.00234124	0.00702378	0.0210713	0.0632139	0.189642	0.568925	1.70678	5.12033	15.361	46.0829	Buthionine sulfoximine	GSS	Glutathione synthesis inhibitor	CCCC[S+]([O-])(=N)CCC(N)C(O)=O
NCGC00015149-15	Bumetanide	NA	Loop Diuretics	s-ewing-osteo-TC71-1	activity	1.3	4	-8.52921	3.98997	114.474	103.974	113.547	11	543.995	544.494	0.543463	0.220796	103.974	106.861	116.103	107.583	116.391	109.439	117.939	114.663	115.837	119.198	113.547	0.000780415	0.00234124	0.00702378	0.0210713	0.0632139	0.189642	0.568925	1.70678	5.12033	15.361	46.0829	Bumetanide	NA	Loop Diuretics	CCCCNC1=CC(=CC(=C1OC2=CC=CC=C2)[S+](N)([O-])=O)C(O)=O
NCGC00015150-04	Betaine hydrochloride	NA	nitric oxide donors	s-ewing-osteo-TC71-1	activity	1.3	4	-5.47921	0.4	135.313	107.642	112.972	11	557.774	557.991	0.712406	0.102092	109.313	110.931	105.837	109.799	113.88	113.371	118.408	124.214	114.13	129.755	112.972	0.000780415	0.00234124	0.00702378	0.0210713	0.0632139	0.189642	0.568925	1.70678	5.12033	15.361	46.0829	Betaine hydrochloride	NA	nitric oxide donors	[Cl-].C[N+](C)(C)CC(=O)O
NCGC00015159-06	Betaxolol	ADRB1	beta1-Adrenoceptor Antagonists	s-ewing-osteo-TC71-1	activity	1.3	4	-5.97921	4.95492	124.638	134.555	123.669	11	630.019	630.684	0.79244	0.0343436	131.555	132.478	133.219	136.933	134.081	133.982	139.473	123.291	127.388	124.212	123.669	0.000780415	0.00234124	0.00702378	0.0210713	0.0632139	0.189642	0.568925	1.70678	5.12033	15.361	46.0829	Betaxolol	ADRB1	beta1-Adrenoceptor Antagonists	CC(C)NCC(O)COc1ccc(cc1)CCOCC2CC2
NCGC00015163-08	Benserazide	DDC	DOPA decarboxylase inhibitor	s-ewing-osteo-TC71-1	activity	2.1	-3	-4.52921	4.95492	58.1494	128.216	64.9972	11	597.747	598.793	0.960337	0.000131149	127.021	138.053	129.336	126.897	128.712	129.131	122.421	124.647	129.346	125.635	64.9972	0.000780415	0.00234124	0.00702378	0.0210713	0.0632139	0.189642	0.568925	1.70678	5.12033	15.361	46.0829	Benserazide	DDC	DOPA decarboxylase inhibitor	NC(CO)C(=O)NNCC1=C(O)C(=C(O)C=C1)O
NCGC00015173-02	BRL-15572	HTR1D	5-HT1D Receptor Antagonist	s-ewing-osteo-TC71-1	activity	2.3	-3	-4.57921	4.95492	67.592	115.017	70.4941	11	539.152	541.639	0.863674	0.00972806	102.523	113.702	119.276	120.458	109.108	117.701	114.212	120.349	116.974	111.701	70.4941	0.000780415	0.00234124	0.00702378	0.0210713	0.0632139	0.189642	0.568925	1.70678	5.12033	15.361	46.0829	BRL-15572	HTR1D	5-HT1D Receptor Antagonist	OC(CN1CCN(CC1)C2=CC=CC(=C2)Cl)C(C3=CC=CC=C3)C4=CC=CC=C4
NCGC00015185-04	Carbidopa	NA	decarboxylase inhibitor	s-ewing-osteo-TC71-1	activity	2.3	4	-4.77921	0.3	94.9986	133.277	105.378	11	594.923	592.057	0.580191	0.186818	137.277	122.685	128.272	119.194	132.951	122.601	125.699	127.34	117.601	115.397	105.378	0.000780415	0.00234124	0.00702378	0.0210713	0.0632139	0.189642	0.568925	1.70678	5.12033	15.361	46.0829	Carbidopa	NA	decarboxylase inhibitor	CC(CC1=CC(=C(O)C=C1)O)(NN)C(O)=O
NCGC00015191-06	Chlormezanone	GABRA1	GABA Modulators	s-ewing-osteo-TC71-1	activity	2.3	-2.4	-4.62921	4.09497	101.698	133.091	103.763	11	629.361	628.193	0.847323	0.0138616	134.091	136.194	136.826	126.976	138.497	133.247	128.919	133.134	127.655	128.552	103.763	0.000780415	0.00234124	0.00702378	0.0210713	0.0632139	0.189642	0.568925	1.70678	5.12033	15.361	46.0829	Chlormezanone	GABRA1	GABA Modulators	O=C1CCS(=O)(=O)C(N1C)c2ccc(Cl)cc2
NCGC00015199-19	Chlorambucil	NA	DNA Alkylating Agent	s-ewing-osteo-TC71-1	activity	2.1	-3	-4.47921	4.95492	30.3586	129.341	46.4894	11	598.002	599.183	0.936637	0.000726731	121.841	122.31	129.731	134.385	135.814	132.419	116.35	130.695	137.094	129.415	46.4894	0.000780415	0.00234124	0.00702378	0.0210713	0.0632139	0.189642	0.568925	1.70678	5.12033	15.361	46.0829	Chlorambucil	NA	DNA Alkylating Agent	OC(=O)CCCC1=CC=C(C=C1)N(CCCl)CCCl
NCGC00015204-08	Carmustine	NA	DNA Alkylating Agent	s-ewing-osteo-TC71-1	activity	1.3	4	-8.57921	3.132	130.546	118.546	122.018	11	621.037	619.867	0.535054	0.256452	118.546	123.587	130.558	134.009	130.206	128.194	128.068	138.453	132.393	123.512	122.018	0.000780415	0.00234124	0.00702378	0.0210713	0.0632139	0.189642	0.568925	1.70678	5.12033	15.361	46.0829	Carmustine	NA	DNA Alkylating Agent	ClCCNC(=O)N(CCCl)N=O
NCGC00015205-07	PK-11195	NR1I3	Constitutive Androstane Receptor Antagonist	s-ewing-osteo-TC71-1	activity	2.3	-2.2	-4.62921	1	84.006	132.029	92.7431	11	610.368	606.249	0.811401	0.0259735	136.429	136.744	126.788	127.364	130.323	128.275	125.107	129.408	123.853	121.304	92.7431	0.000780415	0.00234124	0.00702378	0.0210713	0.0632139	0.189642	0.568925	1.70678	5.12033	15.361	46.0829	PK-11195	NR1I3	Constitutive Androstane Receptor Antagonist	CCC(C)N(C)C(=O)C1=NC(=C2C=CC=CC2=C1)C3=C(Cl)C=CC=C3
NCGC00015207-11	Cilostazol	PDE3A	Phosphodiesterase III (PDE3) Inhibitor	s-ewing-osteo-TC71-1	activity	1.3	1.2	-7.32921	0.3	136.791	104.791	123.253	11	594.062	596.044	0.817616	0.0346416	108.791	117.033	117.428	120.481	121.356	121.679	130.443	123.906	127.39	136.661	123.253	0.000780415	0.00234124	0.00702378	0.0210713	0.0632139	0.189642	0.568925	1.70678	5.12033	15.361	46.0829	Cilostazol	PDE3A	Phosphodiesterase III (PDE3) Inhibitor	O=C1CCC2=C(N1)C=CC(=C2)OCCCCC3=NN=N[N]3C4CCCCC4
NCGC00015208-09	Caffeine	citrated	NA	s-ewing-osteo-TC71-1	activity	1.3	-2.4	-4.87921	2.53343	100.356	130.646	101.404	11	610.127	610.53	0.855543	0.0116768	129.146	137.276	121.282	130.915	132.399	135.367	129.928	128.751	128.351	112.538	101.404	0.000780415	0.00234124	0.00702378	0.0210713	0.0632139	0.189642	0.568925	1.70678	5.12033	15.361	46.0829	Caffeine	citrated	NA	Chitinase Inhibitors	O=C(O)C(O)(CC(=O)O)CC(=O)O.O=C2c1n(C)cnc1N(C)C(=O)N2C
NCGC00015209-12	Cyclophosphamide	BCL2	BCL2/LGALS1 Expression Inhibitor	s-ewing-osteo-TC71-1	activity	1.3	4	-5.02921	0.8	120.093	144.734	124.033	11	674.5	674.716	0.683634	0.10121	146.234	143.943	133.88	151.882	149.997	142.853	141.19	139.463	133.979	132.608	124.033	0.000780415	0.00234124	0.00702378	0.0210713	0.0632139	0.189642	0.568925	1.70678	5.12033	15.361	46.0829	Cyclophosphamide	BCL2	BCL2/LGALS1 Expression Inhibitor	ClCCN(CCCl)[P]1(=O)NCCCO1
NCGC00015225-03	Chelerythrine chloride	BCL2L1	Bcl-xL inhibitor	s-ewing-osteo-TC71-1	activity	4	-1.1	-5.02921	2.40638	-1.88916	137.799	2.53097	11	559.872	558.658	0.981229	7.6042e-06	140.66	139.79	143.046	145.588	140.512	129.457	126.92	126.908	120.095	26.7911	2.53097	0.000780415	0.00234124	0.00702378	0.0210713	0.0632139	0.189642	0.568925	1.70678	5.12033	15.361	46.0829	Chelerythrine chloride	BCL2L1	Bcl-xL inhibitor	COC1=C(OC)C2=C[N+](=C3C(=C2C=C1)C=CC4=CC5=C(OCO5)C=C34)C
NCGC00015226-11	Mitotane	NA	Antineoplastic Agent	s-ewing-osteo-TC71-1	activity	2.1	-2.2	-4.67921	4.09497	54.7226	126.069	59.9556	11	579.573	580.854	0.979345	1.101e-05	120.059	129.458	127.926	125.654	125.034	124.97	129.76	125.234	123.201	111.718	59.9556	0.000780415	0.00234124	0.00702378	0.0210713	0.0632139	0.189642	0.568925	1.70678	5.12033	15.361	46.0829	Mitotane	NA	Antineoplastic Agent	ClC(Cl)C(C1=CC=C(Cl)C=C1)C2=C(Cl)C=CC=C2
NCGC00015233-04	Calmidazolium chloride	CAMKK2	Calmodulin-Dependent Protein Kinase II Inhibitors	s-ewing-osteo-TC71-1	activity	4	-2.1	-4.67921	2.25265	-2.53847	140.248	0.319234	11	615.003	613.378	0.954797	0.000212822	143.204	136.499	138.731	148.129	143.173	143.421	142.476	141.026	117.21	103.128	0.319234	0.000780415	0.00234124	0.00702378	0.0210713	0.0632139	0.189642	0.568925	1.70678	5.12033	15.361	46.0829	Calmidazolium chloride	CAMKK2	Calmodulin-Dependent Protein Kinase II Inhibitors	ClC1=CC=C(C=C1)C(C2=CC=C(Cl)C=C2)[N+]3=C[N](CC(OCC4=C(Cl)C=C(Cl)C=C4)C5=C(Cl)C=C(Cl)C=C5)C=C3
NCGC00015242-12	Chlorothiazide	NA	hypertension treatment	s-ewing-osteo-TC71-1	activity	1.3	4	-7.27921	1.1	117.318	103.318	117.91	11	538.251	539.478	0.640866	0.134985	100.318	108.974	103.562	105.673	112.319	114.551	116.749	119.889	107.099	124.007	117.91	0.000780415	0.00234124	0.00702378	0.0210713	0.0632139	0.189642	0.568925	1.70678	5.12033	15.361	46.0829	Chlorothiazide	NA	hypertension treatment	N[S+]([O-])(=O)C1=C(Cl)C=C2\N=C/N[S+]([O-])(=O)C2=C1
NCGC00015245-07	Bethanechol chloride	NA	Muscarinic receptor Agonists	s-ewing-osteo-TC71-1	activity	1.3	4	-6.77921	1.24751	126.22	141.515	124.609	11	642.311	643.117	0.657362	0.121522	140.015	141.333	138.426	147.336	134.176	134.609	128.77	129.536	117.269	134.889	124.609	0.000780415	0.00234124	0.00702378	0.0210713	0.0632139	0.189642	0.568925	1.70678	5.12033	15.361	46.0829	Bethanechol chloride	NA	Muscarinic receptor Agonists	CC(C[N+](C)(C)C)OC(N)=O
NCGC00015251-14	Clotrimazole	CYP51A1	Lanosterol 14alpha-demethylase Inhibitors	s-ewing-osteo-TC71-1	activity	2.1	-2.1	-4.67921	4.09497	36.8752	123.688	43.2464	11	562.406	564.941	0.983449	4.6706e-06	119.406	126.644	123.706	127.198	127.622	123.193	120.101	120.435	126.864	103.761	43.2464	0.000780415	0.00234124	0.00702378	0.0210713	0.0632139	0.189642	0.568925	1.70678	5.12033	15.361	46.0829	Clotrimazole	CYP51A1	Lanosterol 14alpha-demethylase Inhibitors	ClC1=C(C=CC=C1)C([N]2C=CN=C2)(C3=CC=CC=C3)C4=CC=CC=C4
NCGC00015252-13	Cyproheptadine hydrochloride	HRH1	Histamine H1 Receptor Antagonists	s-ewing-osteo-TC71-1	activity	2.1	-2.1	-4.77921	2.47293	26.6358	124.515	33.549	11	550.02	551.071	0.970901	4.08609e-05	119.964	125.267	114.421	127.22	126.452	130.385	132.525	120.132	118.195	81.1466	33.549	0.000780415	0.00234124	0.00702378	0.0210713	0.0632139	0.189642	0.568925	1.70678	5.12033	15.361	46.0829	Cyproheptadine hydrochloride	HRH1	Histamine H1 Receptor Antagonists	CN1CCC(CC1)=C2C3=C(C=CC=C3)\C=C/C4=C2C=CC=C4
NCGC00015254-12	Clozapine	DRD4	Dopamine D4 Antagonist	s-ewing-osteo-TC71-1	activity	2.3	-3	-4.42921	4.95492	73.6728	121.463	84.909	11	573.828	575.914	0.621401	0.150819	115.463	110.936	112.963	117.146	112.378	124.99	131.035	136.163	131.117	123.841	84.909	0.000780415	0.00234124	0.00702378	0.0210713	0.0632139	0.189642	0.568925	1.70678	5.12033	15.361	46.0829	Clozapine	DRD4	Dopamine D4 Antagonist	CN1CCN(CC1)C2=Nc4cc(Cl)ccc4Nc3ccccc23
NCGC00015256-13	Chloroquine	NA	antimalarial agents	s-ewing-osteo-TC71-1	activity	1.3	4	-7.42921	1.1	130.861	117.861	100.609	11	607.102	609.223	0.641562	0.160486	114.861	120.375	123.256	117.333	127.96	130.316	130.66	132.541	122.537	136.231	100.609	0.000780415	0.00234124	0.00702378	0.0210713	0.0632139	0.189642	0.568925	1.70678	5.12033	15.361	46.0829	Chloroquine	NA	antimalarial agents	CCN(CC)CCCC(C)NC1=CC=NC2=C1C=CC(=C2)Cl
NCGC00015257-06	Clofibrate	PPARA	PPARalpha Agonist	s-ewing-osteo-TC71-1	activity	5	4	NA	NA	NA	NA	130.198	11	NA	645.212	NA	NA	143.29	129.861	124.231	133.118	140.061	136.357	138.414	130.909	142.12	130.819	130.198	0.000780415	0.00234124	0.00702378	0.0210713	0.0632139	0.189642	0.568925	1.70678	5.12033	15.361	46.0829	Clofibrate	PPARA	PPARalpha Agonist	CCOC(=O)C(C)(C)OC1=CC=C(Cl)C=C1
NCGC00015264-08	Clomipramine	SLC6A4	Serotonin Transporter (SERT) Inhibitor	s-ewing-osteo-TC71-1	activity	4	-1.1	-6.12921	1.82648	6.74017	125.162	5.53145	11	385.114	385.374	0.997147	4.5e-09	126.403	119.837	123.784	127.057	129.631	116.595	77.5297	30.5536	8.97303	7.36805	5.53145	0.000780415	0.00234124	0.00702378	0.0210713	0.0632139	0.189642	0.568925	1.70678	5.12033	15.361	46.0829	Clomipramine	SLC6A4	Serotonin Transporter (SERT) Inhibitor	CN(C)CCCN2c3ccccc3CCc1ccc(Cl)cc12
NCGC00015267-09	Citalopram hydrobromide	HTR1A	5-HT Reuptake Inhibitor	s-ewing-osteo-TC71-1	activity	1.3	-2.2	-4.82921	2.24812	83.4624	127.622	86.7822	11	589.302	588.887	0.812169	0.0256496	125.557	133.193	121.018	135.488	128.677	131.397	112.302	132.14	123.248	104.171	86.7822	0.000780415	0.00234124	0.00702378	0.0210713	0.0632139	0.189642	0.568925	1.70678	5.12033	15.361	46.0829	Citalopram hydrobromide	HTR1A	5-HT Reuptake Inhibitor	CN(C)CCCC1(OCC2=C1C=CC(=C2)C#N)C3=CC=C(F)C=C3
NCGC00015268-05	Clonidine	ADRA1A	alpha1-Adrenoceptor Agonists	s-ewing-osteo-TC71-1	activity	1.3	4	-8.67921	1.82648	127.395	107.395	120.481	11	602.861	605.032	0.588612	0.207356	110.395	118.026	127.646	122.15	127.97	125.846	118.549	127.206	130.671	136.461	120.481	0.000780415	0.00234124	0.00702378	0.0210713	0.0632139	0.189642	0.568925	1.70678	5.12033	15.361	46.0829	Clonidine	ADRA1A	alpha1-Adrenoceptor Agonists	Clc2cccc(Cl)c2\N=C1/NCCN1
NCGC00015278-14	Carisoprodol	NA	Muscle relaxant	s-ewing-osteo-TC71-1	activity	1.3	4	-6.77921	0.8	124.041	108.191	123.899	11	559.286	559.552	0.742459	0.0610682	109.541	107.58	106.333	113.705	117.962	109.126	120.069	128.386	121.843	121.842	123.899	0.000780415	0.00234124	0.00702378	0.0210713	0.0632139	0.189642	0.568925	1.70678	5.12033	15.361	46.0829	Carisoprodol	NA	Muscle relaxant	CCCC(C)(COC(N)=O)COC(=O)NC(C)C
NCGC00015300-05	GBR 12909 dihydrochloride	NA	Dopamine Reuptake Inhibitor	s-ewing-osteo-TC71-1	activity	4	-2.1	-4.72921	2.33317	-0.391879	102.588	1.53457	11	446.353	446.005	0.975559	2.10068e-05	97.8571	103.979	101.871	101.854	104.69	105.381	106.665	98.5571	92.2551	69.722	1.53457	0.000780415	0.00234124	0.00702378	0.0210713	0.0632139	0.189642	0.568925	1.70678	5.12033	15.361	46.0829	GBR 12909 dihydrochloride	NA	Dopamine Reuptake Inhibitor	Cl.Cl.Fc1ccc(cc1)C(OCCN2CCN(CC2)CCCc3ccccc3)c4ccc(F)cc4
NCGC00015316-06	Eflornithine Hydrochloride	ODC1	Ornithine Decarboxylase Inhibitors	s-ewing-osteo-TC71-1	activity	1.3	4	-5.67921	4.95492	109.77	125.108	110.822	11	580.634	581.271	0.80553	0.0284401	120.608	125.958	130.075	122.047	124.048	126.801	125.712	121.119	104.076	114.508	110.822	0.000780415	0.00234124	0.00702378	0.0210713	0.0632139	0.189642	0.568925	1.70678	5.12033	15.361	46.0829	Eflornithine Hydrochloride	ODC1	Ornithine Decarboxylase Inhibitors	NCCCC(N)(C(F)F)C(O)=O
NCGC00015321-04	Dobutamine	ADRB1	beta1-Adrenoceptor Antagonists	s-ewing-osteo-TC71-1	activity	4	-2.1	-4.62921	4.09497	21.5901	122.725	29.3125	11	556.527	558.734	0.964588	8.57675e-05	119.107	129.369	117.387	126.61	125.865	122.366	132.693	121.937	114.198	104.241	29.3125	0.000780415	0.00234124	0.00702378	0.0210713	0.0632139	0.189642	0.568925	1.70678	5.12033	15.361	46.0829	Dobutamine	ADRB1	beta1-Adrenoceptor Antagonists	Oc2ccc(CCNC(C)CCc1ccc(O)cc1)cc2O
NCGC00015332-04	Diltiazem hydrochloride	NA	Ca2+ channel blocker	s-ewing-osteo-TC71-1	activity	1.3	4	-4.87921	0.4	108.001	140.441	115.491	11	640.616	640.43	0.625287	0.147801	142.941	139.818	134.018	141.933	135.639	129.405	140.131	128.868	121.451	133.224	115.491	0.000780415	0.00234124	0.00702378	0.0210713	0.0632139	0.189642	0.568925	1.70678	5.12033	15.361	46.0829	Diltiazem hydrochloride	NA	Ca2+ channel blocker	similar pharmacology to verapamil	COC1=CC=C(C=C1)C2SC3=C(C=CC=C3)N(CCN(C)C)C(=O)C2OC(C)=O
NCGC00015335-11	Diphenhydramine hydrochloride	HRH1	Histamine H1 Receptor Antagonists	s-ewing-osteo-TC71-1	activity	2.1	-3	-4.57921	4.50447	58.0324	123.967	63.1688	11	576.587	577.669	0.967229	6.41106e-05	121.408	121.479	123.448	120.052	122.781	131.976	128.049	124.608	122.522	118.842	63.1688	0.000780415	0.00234124	0.00702378	0.0210713	0.0632139	0.189642	0.568925	1.70678	5.12033	15.361	46.0829	Diphenhydramine hydrochloride	HRH1	Histamine H1 Receptor Antagonists	CN(C)CCOC(C1=CC=CC=C1)C2=CC=CC=C2
NCGC00015349-06	Daphnetin	NA	antimalarial agents	s-ewing-osteo-TC71-1	activity	1.1	-2.1	-4.82921	1.92824	38.1073	128.938	46.6302	11	569.261	569.655	0.98597	2.4552e-06	128.937	126.386	125.725	136.619	130.335	126.833	130.729	124.068	118.26	83.74	46.6302	0.000780415	0.00234124	0.00702378	0.0210713	0.0632139	0.189642	0.568925	1.70678	5.12033	15.361	46.0829	Daphnetin	NA	antimalarial agents	OC1=C(O)C2=C(\C=C/C(=O)O2)C=C1
NCGC00015365-18	4'	7-Dihydroxyisoflavanone	ESR1	s-ewing-osteo-TC71-1	activity	2.3	-3	-4.62921	1.21	77.7209	128.297	86.9166	11	593.409	588.282	0.742923	0.0605993	132.895	124.221	123.086	120.772	128.528	130.525	129.024	128.71	110.448	121.306	86.9166	0.000780415	0.00234124	0.00702378	0.0210713	0.0632139	0.189642	0.568925	1.70678	5.12033	15.361	46.0829	4'	7-Dihydroxyisoflavanone	ESR1	Estrogen Receptor Modulator	OC1=CC=C(C=C1)\C2=C\OC3=C(C=CC(=C3)O)C2=O
NCGC00015385-12	Dipyridamole	PDE5A	Phosphodiesterase III/V (PDE5) inhibitor	s-ewing-osteo-TC71-1	activity	2.1	-2.1	-4.67921	4.09497	34.0631	126.684	41.5644	11	574.662	575.814	0.969818	4.694e-05	128.789	128.44	128.1	128.372	132.608	121.067	125.211	131.233	116.962	106.594	41.5644	0.000780415	0.00234124	0.00702378	0.0210713	0.0632139	0.189642	0.568925	1.70678	5.12033	15.361	46.0829	Dipyridamole	PDE5A	Phosphodiesterase III/V (PDE5) inhibitor	OCCN(CCO)c2nc1c(nc(nc1c(n2)N3CCCCC3)N(CCO)CCO)N4CCCCC4
NCGC00015389-08	Propofol	TRPV1	TRPV1 (Vanilloid VR1 Receptor) Agonist	s-ewing-osteo-TC71-1	activity	1.3	4	-4.87921	0.3	104.461	139.557	114.31	11	627.014	624.381	0.622419	0.150317	143.557	130.96	128.849	130.237	135.497	133.177	136.536	127.671	127.59	120.702	114.31	0.000780415	0.00234124	0.00702378	0.0210713	0.0632139	0.189642	0.568925	1.70678	5.12033	15.361	46.0829	Propofol	TRPV1	TRPV1 (Vanilloid VR1 Receptor) Agonist	CC(C)c1cccc(C(C)C)c1O
NCGC00015399-15	Etodolac	PTGS2	Cyclooxygenase-2 Inhibitor	s-ewing-osteo-TC71-1	activity	2.3	-2.4	-4.57921	4.50447	97.9983	125.792	100.047	11	596.512	597.35	0.797806	0.0317385	117.792	123.537	128.941	129.69	130.576	127.082	120.674	127.133	124.461	123.543	100.047	0.000780415	0.00234124	0.00702378	0.0210713	0.0632139	0.189642	0.568925	1.70678	5.12033	15.361	46.0829	Etodolac	PTGS2	Cyclooxygenase-2 Inhibitor	CCC1=CC=CC2=C1[NH]C3=C2CCOC3(CC)CC(O)=O
NCGC00015418-08	Ethosuximide	NA	anti-epileptic drug	s-ewing-osteo-TC71-1	activity	2.3	-2.4	-4.62921	1	90.4665	121.436	99.4614	11	568.062	566.62	0.828368	0.0197702	124.436	122.907	121.793	116.765	125.783	116.366	120.064	116.194	118.928	109.444	99.4614	0.000780415	0.00234124	0.00702378	0.0210713	0.0632139	0.189642	0.568925	1.70678	5.12033	15.361	46.0829	Ethosuximide	NA	anti-epileptic drug	CCC1(C)CC(=O)NC1=O
NCGC00015420-09	Emodin	NA	Casein Kinase II (CK2) Inhibitor	s-ewing-osteo-TC71-1	activity	1.3	4	-4.92921	0.6	95.8343	130.627	104.383	11	597.088	599.845	0.849026	0.529384	127.127	132.781	98.2011	132.3	131.347	128.542	121.598	118.551	125.152	110.9	104.383	0.000780415	0.00234124	0.00702378	0.0210713	0.0632139	0.189642	0.568925	1.70678	5.12033	15.361	46.0829	Emodin	NA	Casein Kinase II (CK2) Inhibitor	CC1=CC2=C(C(=C1)O)C(=O)C3=C(C=C(O)C=C3O)C2=O
NCGC00015429-08	Felbamate	GABRA1	GABAA Receptor Modulator	s-ewing-osteo-TC71-1	activity	2.3	-2.4	-4.72921	1.28756	106.434	136.443	112.185	11	640.181	642.112	0.828184	0.0198102	130.943	137.307	142.297	140.226	132.546	134.242	137.631	138.132	128.54	124.989	112.185	0.000780415	0.00234124	0.00702378	0.0210713	0.0632139	0.189642	0.568925	1.70678	5.12033	15.361	46.0829	Felbamate	GABRA1	GABAA Receptor Modulator	NC(=O)OCC(COC(N)=O)c1ccccc1
NCGC00015436-09	Fluphenazine hydrochloride	DRD2	Dopamine D2 Antagonist	s-ewing-osteo-TC71-1	activity	4	-3	-4.57921	4.50447	21.2397	111.189	28.1007	11	508.143	509.401	0.963478	9.63112e-05	104.229	109.038	110.329	116.052	110.63	110.074	117.35	118.896	103.473	103.561	28.1007	0.000780415	0.00234124	0.00702378	0.0210713	0.0632139	0.189642	0.568925	1.70678	5.12033	15.361	46.0829	Fluphenazine hydrochloride	DRD2	Dopamine D2 Antagonist	OCCN1CCN(CCCN2C3=C(SC4=C2C=C(C=C4)C(F)(F)F)C=CC=C3)CC1
NCGC00015437-16	Fenofibrate	PPARA	PPARalpha Agonist	s-ewing-osteo-TC71-1	activity	2.3	-2.4	-4.77921	3.51175	111.188	137.727	110.695	11	649.272	648.744	0.872204	0.00794307	138.227	132.961	135.635	137.553	143.511	140.318	132.391	138.106	139.387	127.16	110.695	0.000780415	0.00234124	0.00702378	0.0210713	0.0632139	0.189642	0.568925	1.70678	5.12033	15.361	46.0829	Fenofibrate	PPARA	PPARalpha Agonist	CC(C)OC(=O)C(C)(C)OC1=CC=C(C=C1)C(=O)C2=CC=C(Cl)C=C2
NCGC00015439-06	Flumazenil	GABRA1	GABA(A) BZ Site Receptor Antagonists	s-ewing-osteo-TC71-1	activity	1.3	4	-5.52921	4.95492	126.125	140.042	124.028	11	656.04	657.331	0.687814	0.0981762	136.042	131.686	140.646	138.344	141.861	143.805	146.401	140.09	125.183	130.439	124.028	0.000780415	0.00234124	0.00702378	0.0210713	0.0632139	0.189642	0.568925	1.70678	5.12033	15.361	46.0829	Flumazenil	GABRA1	GABA(A) BZ Site Receptor Antagonists	O=C(OCC)c3ncn2c3CN(C)C(=O)c1cc(F)ccc12
NCGC00015442-16	Fluorouracil	NA	Pyrimidine Antagonists	s-ewing-osteo-TC71-1	activity	1.1	-1.2	-5.22921	1.2221	45.8452	133.133	55.6672	11	556.402	554.84	0.979298	1.11009e-05	136.538	132.498	126.639	139.715	134.064	131.399	123.889	116.018	97.6726	60.7586	55.6672	0.000780415	0.00234124	0.00702378	0.0210713	0.0632139	0.189642	0.568925	1.70678	5.12033	15.361	46.0829	Fluorouracil	NA	Pyrimidine Antagonists	F\C1=C\NC(=O)NC1=O
NCGC00015443-06	Flecainide	SCN5A	Nav1.5 (Cardiac/SkMII) Sodium Channel Blockers	s-ewing-osteo-TC71-1	activity	2.1	-3	-4.47921	4.95492	35.916	124.501	50.4018	11	577.226	577.859	0.951417	0.00027763	119.108	119.864	126.385	124.013	119.268	117.153	132.535	126.744	128.807	127.868	50.4018	0.000780415	0.00234124	0.00702378	0.0210713	0.0632139	0.189642	0.568925	1.70678	5.12033	15.361	46.0829	Flecainide	SCN5A	Nav1.5 (Cardiac/SkMII) Sodium Channel Blockers	FC(F)(F)COc2cc(C(=O)NCC1CCCCN1)c(OCC(F)(F)F)cc2
NCGC00015444-04	Fenoldopam	DRD1	Dopamine D1 Agonist	s-ewing-osteo-TC71-1	activity	2.3	4	-4.42921	4.95492	102.363	116.941	104.96	11	559.045	561.25	0.317765	0.420225	107.941	116.279	114.753	120.791	119.073	118.138	124.56	115.159	109.432	123.894	104.96	0.000780415	0.00234124	0.00702378	0.0210713	0.0632139	0.189642	0.568925	1.70678	5.12033	15.361	46.0829	Fenoldopam	DRD1	Dopamine D1 Agonist	Oc1ccc(cc1)C3CNCCc2c3cc(O)c(O)c2Cl
NCGC00015448-04	Salirasib	MTOR	mTOR Inhibitor	s-ewing-osteo-TC71-1	activity	4	-1.1	-5.62921	0.9	17.7541	132.804	26.1591	11	481.886	483.956	0.989003	9.464e-07	123.892	137.04	137.564	134.47	124.257	120.709	110.486	79.5475	58.9307	34.3517	26.1591	0.000780415	0.00234124	0.00702378	0.0210713	0.0632139	0.189642	0.568925	1.70678	5.12033	15.361	46.0829	Salirasib	MTOR	mTOR Inhibitor	CC(C)=CCC\C(C)=C\CC\C(C)=C\CSC1=C(C=CC=C1)C(O)=O
NCGC00015451-06	Flupirtine maleate	KCNQ1	Voltage-Gated K(V) 7 (KCNQ) Channel Activator	s-ewing-osteo-TC71-1	activity	2.1	-3	-4.62921	4.09497	73.0569	129.567	77.5755	11	604.138	602.997	0.932623	0.000905222	130.759	133.938	130.082	125.232	134.49	132.155	125.753	131.317	120.218	120.71	77.5755	0.000780415	0.00234124	0.00702378	0.0210713	0.0632139	0.189642	0.568925	1.70678	5.12033	15.361	46.0829	Flupirtine maleate	KCNQ1	Voltage-Gated K(V) 7 (KCNQ) Channel Activator	CCOC(=O)NC1=CC=C(NCC2=CC=C(F)C=C2)N=C1N
NCGC00015452-19	Flutamide	AR	Androgen Receptor Antagonist	s-ewing-osteo-TC71-1	activity	4	-1.1	-4.97921	4.09497	19.6756	125.516	18.0279	11	530.064	532.502	0.995008	4.2e-08	121.009	123.983	130.702	126.52	125.691	123.156	129.222	125.912	120.117	39.9119	18.0279	0.000780415	0.00234124	0.00702378	0.0210713	0.0632139	0.189642	0.568925	1.70678	5.12033	15.361	46.0829	Flutamide	AR	Androgen Receptor Antagonist	CC(C)C(=O)NC1=CC(=C(C=C1)[N+]([O-])=O)C(F)(F)F
NCGC00015462-12	Glipizide	NA	K(ATP) Channel Blockers	s-ewing-osteo-TC71-1	activity	2.1	-2.2	-4.72921	2.72022	52.4206	117.338	53.5125	11	535.188	534.483	0.944321	0.000456505	112.838	113.569	109.255	116.901	125.334	120.958	116.413	123.237	114.759	92.6483	53.5125	0.000780415	0.00234124	0.00702378	0.0210713	0.0632139	0.189642	0.568925	1.70678	5.12033	15.361	46.0829	Glipizide	NA	K(ATP) Channel Blockers	CC1=NC=C(N=C1)C(=O)NCCC2=CC=C(C=C2)[S+]([O-])(=O)NC(=O)NC3CCCCC3
NCGC00015463-02	GYKI-52466	NA	AMPA Antagonist	s-ewing-osteo-TC71-1	activity	1.3	4	-8.52921	3.51175	124.885	108.885	126.023	11	590.84	591.19	0.587136	0.180905	108.885	113.958	125.759	121.617	115.961	124.935	127.463	133.5	119.894	129.18	126.023	0.000780415	0.00234124	0.00702378	0.0210713	0.0632139	0.189642	0.568925	1.70678	5.12033	15.361	46.0829	GYKI-52466	NA	AMPA Antagonist	C\C1=N\N=C(\C2=CC=C(N)C=C2)C3=CC4=C(OCO4)C=C3C1
NCGC00015466-04	Gabapentin	NA	Calcium Channels (Voltage-Gated) alpha2/delta-1/2 Subunit Ligand	s-ewing-osteo-TC71-1	activity	2.1	-3	-4.42921	4.95492	37.4516	124.66	58.0145	11	580.944	582.233	0.965747	7.57193e-05	122.274	124.133	121.082	122.316	127.621	129.585	119.809	130.288	122.618	128.4	58.0145	0.000780415	0.00234124	0.00702378	0.0210713	0.0632139	0.189642	0.568925	1.70678	5.12033	15.361	46.0829	Gabapentin	NA	Calcium Channels (Voltage-Gated) alpha2/delta-1/2 Subunit Ligand	NCC1(CCCCC1)CC(O)=O
NCGC00015471-06	Ganciclovir	NA	DNA Polymerase Inhibitors	s-ewing-osteo-TC71-1	activity	4	-2.1	-4.62921	4.09497	-8.14283	134.085	3.24525	11	597.57	597.184	0.946908	0.000383804	145.596	126.831	129.085	147.132	133.471	142.985	138.243	130.847	114.515	113.869	3.24525	0.000780415	0.00234124	0.00702378	0.0210713	0.0632139	0.189642	0.568925	1.70678	5.12033	15.361	46.0829	Ganciclovir	NA	DNA Polymerase Inhibitors	N\C1=N\C2=C(N=C[N]2COC(CO)CO)C(=O)N1
NCGC00015478-08	GW-5074	BRAF	Raf Kinase Inhibitors	s-ewing-osteo-TC71-1	activity	2.3	-2.2	-4.72921	1.71374	69.1779	125.692	74.5077	11	576.955	578.964	0.884121	0.00577276	116.603	130.635	136.293	129.602	124.704	126.799	120.99	122.197	115.063	106.081	74.5077	0.000780415	0.00234124	0.00702378	0.0210713	0.0632139	0.189642	0.568925	1.70678	5.12033	15.361	46.0829	GW-5074	BRAF	Raf Kinase Inhibitors	OC1=C(Br)C=C(C=C1Br)\C=C2/C(=O)NC3=C2C=C(I)C=C3
NCGC00015479-20	Genistein	TOP2A	DNA Topoisomerase II Inhibitors	s-ewing-osteo-TC71-1	activity	2.3	-2.4	-4.72921	3.132	93.6025	136.524	91.6729	11	637.536	638.818	0.751467	0.0554812	125.259	125.578	128.964	134.055	149.319	138.316	146.441	139.749	139.738	121.467	91.6729	0.000780415	0.00234124	0.00702378	0.0210713	0.0632139	0.189642	0.568925	1.70678	5.12033	15.361	46.0829	Genistein	TOP2A	DNA Topoisomerase II Inhibitors	OC1=CC=C(C=C1)\C2=C\OC3=C(C(=CC(=C3)O)O)C2=O
NCGC00015480-13	GW-7647	PPARA	PPARalpha Agonist	s-ewing-osteo-TC71-1	activity	2.3	4	-4.72921	1.86169	113.735	139.363	117.09	11	657.755	660.164	0.708282	0.0833843	133.863	138.658	149.96	135.089	137.877	140.782	138.578	143.519	134.195	130.81	117.09	0.000780415	0.00234124	0.00702378	0.0210713	0.0632139	0.189642	0.568925	1.70678	5.12033	15.361	46.0829	GW-7647	PPARA	PPARalpha Agonist	CC(C)(SC1=CC=C(CCN(CCCCC2CCCCC2)C(=O)NC3CCCCC3)C=C1)C(O)=O
NCGC00015482-05	Gallamine triethiodide	NA	Muscarinic M2 Antagonists	s-ewing-osteo-TC71-1	activity	1.3	4	-5.92921	4.95492	119.254	127.664	121.56	11	599.738	600.282	0.491999	0.267272	126.164	126.813	123.392	129.177	127.691	130.145	131.181	120.215	110.405	126.224	121.56	0.000780415	0.00234124	0.00702378	0.0210713	0.0632139	0.189642	0.568925	1.70678	5.12033	15.361	46.0829	Gallamine triethiodide	NA	Muscarinic M2 Antagonists	CC[N+](CC)(CC)CCOC1=CC=CC(=C1OCC[N+](CC)(CC)CC)OCC[N+](CC)(CC)CC
NCGC00015484-06	GBR-12935	NA	Dopamine Reuptake Inhibitor	s-ewing-osteo-TC71-1	activity	2.1	-2.2	-4.77921	1	68.4959	122.314	77.5104	11	555.03	555.668	0.942146	0.000524815	122.583	125.208	124.103	123.001	122.265	121.884	114.758	117.611	107.315	102.677	77.5104	0.000780415	0.00234124	0.00702378	0.0210713	0.0632139	0.189642	0.568925	1.70678	5.12033	15.361	46.0829	GBR-12935	NA	Dopamine Reuptake Inhibitor	C(CN1CCN(CCOC(C2=CC=CC=C2)C3=CC=CC=C3)CC1)CC4=CC=CC=C4
NCGC00015500-10	Haloperidol	DRD2	Dopamine D2 Antagonist	s-ewing-osteo-TC71-1	activity	2.1	-2.2	-4.72921	1	59.5944	122.035	75.3697	11	550.704	550.225	0.930196	0.00102627	124.668	114.287	123.969	121.584	124.523	126.692	115.489	116.323	106.051	98.683	75.3697	0.000780415	0.00234124	0.00702378	0.0210713	0.0632139	0.189642	0.568925	1.70678	5.12033	15.361	46.0829	Haloperidol	DRD2	Dopamine D2 Antagonist	Fc1ccc(cc1)C(=O)CCCN2CCC(O)(CC2)c3ccc(Cl)cc3
NCGC00015501-07	Hydralazine hydrochloride	NA	Smooth Muscle Relaxant	s-ewing-osteo-TC71-1	activity	1.3	4	-7.87921	1.24751	117.569	104.381	108.665	11	548.758	549.338	0.517646	0.271752	107.569	101.579	110.487	114.132	109.691	126.601	116.261	112.474	113.987	122.194	108.665	0.000780415	0.00234124	0.00702378	0.0210713	0.0632139	0.189642	0.568925	1.70678	5.12033	15.361	46.0829	Hydralazine hydrochloride	NA	Smooth Muscle Relaxant	NNC1=C2C=CC=CC2=CN=N1
NCGC00015508-17	Hydrochlorothiazide	NA	hypertension treatment	s-ewing-osteo-TC71-1	activity	1.3	4	-7.72921	0.7	123.924	99.9239	119.485	11	561.04	561.258	0.82591	0.652802	101.424	106.337	105.775	116.706	110.922	123.452	118.435	127.052	125.728	85.2488	119.485	0.000780415	0.00234124	0.00702378	0.0210713	0.0632139	0.189642	0.568925	1.70678	5.12033	15.361	46.0829	Hydrochlorothiazide	NA	hypertension treatment	N[S+]([O-])(=O)C1=C(Cl)C=C2NCN[S+]([O-])(=O)C2=C1
NCGC00015513-09	Histamine dihydrochloride	HRH1	Histamine Receptor Agonist	s-ewing-osteo-TC71-1	activity	2.1	-3	-4.62921	4.09497	74.7772	134.38	79.1737	11	626.25	627.325	0.927493	0.00117297	133.426	131.503	132.605	132.588	140.293	144.635	136.702	131.594	127.4	125.312	79.1737	0.000780415	0.00234124	0.00702378	0.0210713	0.0632139	0.189642	0.568925	1.70678	5.12033	15.361	46.0829	Histamine dihydrochloride	HRH1	Histamine Receptor Agonist	NCCC1=C[NH]C=N1
NCGC00015519-09	Dopamine HCl	NA	neurotransmitter	s-ewing-osteo-TC71-1	activity	2.3	-2.2	-4.77921	1.50949	98.685	142.584	105.085	11	661.761	662.941	0.893331	0.00440013	139.584	149.956	143.836	143.119	137.055	138.464	148.431	139.729	133.853	124.878	105.085	0.000780415	0.00234124	0.00702378	0.0210713	0.0632139	0.189642	0.568925	1.70678	5.12033	15.361	46.0829	Dopamine HCl	NA	neurotransmitter	NCCC1=CC(=C(O)C=C1)O
NCGC00015520-10	Hydroxyurea	RRM1	Ribonucleoside-Diphosphate Reductase Inhibitors	s-ewing-osteo-TC71-1	activity	4	-2.1	-5.22921	0.6	-28.8914	116.86	1.43587	11	400.462	399.125	0.961675	0.000115293	118.079	113.785	123.311	108.94	107.153	92.1531	84.0322	67.8182	66.0376	13.4323	1.43587	0.000780415	0.00234124	0.00702378	0.0210713	0.0632139	0.189642	0.568925	1.70678	5.12033	15.361	46.0829	Hydroxyurea	RRM1	Ribonucleoside-Diphosphate Reductase Inhibitors	NC(=O)NO
NCGC00015529-18	Ibuprofen lysine	PTGS1	Cyclooxygenase-1/2 Inhibitor	s-ewing-osteo-TC71-1	activity	1.3	4	-6.04041	0.5	132.55	116.549	129.324	11	624.507	624.402	0.699006	0.0902655	116.55	115.762	114.049	126.487	116.565	119.016	121.647	125.833	124.854	130.345	129.324	0.00039023	0.00117065	0.00351189	0.0105357	0.031607	0.0948209	0.284463	0.853388	2.56016	7.68049	23.0415	Ibuprofen lysine	PTGS1	Cyclooxygenase-1/2 Inhibitor	CC(C)CC1=CC=C(C=C1)C(C)C(O)=O
NCGC00015558-06	Isoproterenol	ADRB1	beta-Adrenoceptor Agonists	s-ewing-osteo-TC71-1	activity	1.1	-2.2	-5.22921	1	81.2949	130.579	83.3317	11	579.31	582.927	0.926894	0.00120747	119.818	131.343	134.285	135.937	133.627	130.624	122.705	119.894	107.656	97.9246	83.3317	0.000780415	0.00234124	0.00702378	0.0210713	0.0632139	0.189642	0.568925	1.70678	5.12033	15.361	46.0829	Isoproterenol	ADRB1	beta-Adrenoceptor Agonists	Oc1ccc(cc1O)C(O)CNC(C)C
NCGC00015562-24	Indomethacin	NA	non-steroidal antiinflammatory	s-ewing-osteo-TC71-1	activity	2.1	-3	-4.57921	4.50447	52.5093	131.812	58.6241	11	610.382	611.082	0.947928	0.000357795	129.295	134.607	127.262	137.4	136.854	138.462	120.626	132.487	129.835	124.923	58.6241	0.000780415	0.00234124	0.00702378	0.0210713	0.0632139	0.189642	0.568925	1.70678	5.12033	15.361	46.0829	Indomethacin	NA	non-steroidal antiinflammatory	COC1=CC2=C(C=C1)[N](C(=C2CC(O)=O)C)C(=O)C3=CC=C(Cl)C=C3
NCGC00015578-10	Ketoprofen	NA	non-steroidal antiinflammatory	s-ewing-osteo-TC71-1	activity	2.1	-2.2	-4.67921	4.09497	45.4017	125.177	51.043	11	572.17	573.181	0.901965	0.00331386	120.548	117.797	136.421	138.447	126.288	127.647	124.91	118.68	114.397	107.161	51.043	0.000780415	0.00234124	0.00702378	0.0210713	0.0632139	0.189642	0.568925	1.70678	5.12033	15.361	46.0829	Ketoprofen	NA	non-steroidal antiinflammatory	CC(C(O)=O)C1=CC=CC(=C1)C(=O)C2=CC=CC=C2
NCGC00015580-08	Ketotifen	HRH1	Histamine H1 Receptor Antagonists	s-ewing-osteo-TC71-1	activity	4	-2.1	-4.87921	4.44947	13.9507	124.842	15.4179	11	534.001	534.411	0.986873	1.8928e-06	120.223	126.234	125.091	127.896	117.735	120.593	123.014	129.794	130.902	49.8486	15.4179	0.000780415	0.00234124	0.00702378	0.0210713	0.0632139	0.189642	0.568925	1.70678	5.12033	15.361	46.0829	Ketotifen	HRH1	Histamine H1 Receptor Antagonists	CN1CC/C(CC1)=C3\c4ccccc4CC(=O)c2sccc23
NCGC00015590-07	Linopirdine	NA	K(ATP) Channel Blockers	s-ewing-osteo-TC71-1	activity	2.1	-2.2	-4.77921	3.51175	71.2287	124.374	72.0794	11	572.318	573.14	0.956946	0.000177931	119.374	126.073	124.915	122.041	123.961	118.83	128.292	127.038	129.467	99.5492	72.0794	0.000780415	0.00234124	0.00702378	0.0210713	0.0632139	0.189642	0.568925	1.70678	5.12033	15.361	46.0829	Linopirdine	NA	K(ATP) Channel Blockers	O=C1N(C2=CC=CC=C2)C3=C(C=CC=C3)C1(CC4=CC=NC=C4)CC5=CC=NC=C5
NCGC00015598-03	beta-Lapachone	TOP1	DNA Topoisomerase I/II Inhibitors	s-ewing-osteo-TC71-1	activity	4	-2.1	-4.57921	4.09497	-12.5253	145.221	1.89082	11	651.25	650.864	0.988495	1.1299e-06	148.994	152.784	145.473	148.466	136.338	147.719	147.786	139.436	143.679	126.884	1.89082	0.000780415	0.00234124	0.00702378	0.0210713	0.0632139	0.189642	0.568925	1.70678	5.12033	15.361	46.0829	beta-Lapachone	TOP1	DNA Topoisomerase I/II Inhibitors	CC1(C)CC\C2=C(/O1)C3=C(C=CC=C3)C(=O)C2=O
NCGC00015601-03	LY310762	HTR1D	5-HT1D Receptor Antagonist	s-ewing-osteo-TC71-1	activity	2.3	4	-4.42921	4.95492	89.1378	119.687	96.4792	11	568.897	570.098	0.711995	0.0808168	113.187	113.451	116.175	122.445	120.869	119.626	122.598	116.752	127.121	123.835	96.4792	0.000780415	0.00234124	0.00702378	0.0210713	0.0632139	0.189642	0.568925	1.70678	5.12033	15.361	46.0829	LY310762	HTR1D	5-HT1D Receptor Antagonist	CC1(C)C(=O)N(CCN2CCC(CC2)C(=O)C3=CC=C(F)C=C3)C4=C1C=CC=C4
NCGC00015603-07	Lomefloxacin hydrochloride	NA	Quinoline Antibiotic	s-ewing-osteo-TC71-1	activity	1.3	4	-6.12921	0.3	136.033	115.533	135.716	11	596.645	595.61	0.681381	0.103321	117.033	118.153	118.465	119.397	127.423	125.79	125.48	124.33	128.867	123.983	135.716	0.000780415	0.00234124	0.00702378	0.0210713	0.0632139	0.189642	0.568925	1.70678	5.12033	15.361	46.0829	Lomefloxacin hydrochloride	NA	Quinoline Antibiotic	CCN1\C=C(C(O)=O)/C(=O)C2=C1C(=C(N3CCNC(C)C3)C(=C2)F)F
NCGC00015605-10	Lamotrigine	NA	Sodium channel inhibitor	s-ewing-osteo-TC71-1	activity	2.1	-3	-4.52921	4.95492	22.9739	115.218	32.033	11	529.401	530.279	0.946573	0.000392838	107.218	101.842	111.56	119.842	118.394	119.532	119.716	117.751	119.425	111.348	32.033	0.000780415	0.00234124	0.00702378	0.0210713	0.0632139	0.189642	0.568925	1.70678	5.12033	15.361	46.0829	Lamotrigine	NA	Sodium channel inhibitor	NC1=NC(=C(N=N1)C2=CC=CC(=C2Cl)Cl)N
NCGC00015608-04	Loperamide	OPRM1	mu-Opioid Antagonists	s-ewing-osteo-TC71-1	activity	2.1	-2.1	-4.67921	1.331	4.76194	125.257	31.6536	11	544.463	541.495	0.958352	0.00015718	135.083	116.755	124.063	119.379	132.295	121.352	125.349	125.78	102.417	81.8103	31.6536	0.000780415	0.00234124	0.00702378	0.0210713	0.0632139	0.189642	0.568925	1.70678	5.12033	15.361	46.0829	Loperamide	OPRM1	mu-Opioid Antagonists	CN(C)C(=O)C(CCN1CCC(O)(CC1)c2ccc(Cl)cc2)(c3ccccc3)c4ccccc4
NCGC00015609-05	Lonidamine	HK1	hexokinase inactivator	s-ewing-osteo-TC71-1	activity	1.3	4	-6.47921	4.95492	123.701	133.234	120.158	11	619.629	619.136	0.394738	0.354134	135.234	130.666	123.873	132.221	134.293	142.97	115.207	130.939	123.625	127.236	120.158	0.000780415	0.00234124	0.00702378	0.0210713	0.0632139	0.189642	0.568925	1.70678	5.12033	15.361	46.0829	Lonidamine	HK1	hexokinase inactivator	OC(=O)C1=N[N](CC2=C(Cl)C=C(Cl)C=C2)C3=C1C=CC=C3
NCGC00015610-18	Leflunomide	JAK1	Jak inhibitor	s-ewing-osteo-TC71-1	activity	2.1	-2.2	-4.72921	1.50949	64.4684	136.532	73.0756	11	620.443	621.432	0.939615	0.000611792	134.556	143.55	136.71	135.163	134.833	137.954	138.752	133.437	119.06	113.757	73.0756	0.000780415	0.00234124	0.00702378	0.0210713	0.0632139	0.189642	0.568925	1.70678	5.12033	15.361	46.0829	Leflunomide	JAK1	Jak inhibitor	CC1=C(C=NO1)C(=O)NC2=CC=C(C=C2)C(F)(F)F
NCGC00015615-14	Lansoprazole	NA	H+/K+-ATPase Inhibitor	s-ewing-osteo-TC71-1	activity	2.1	-3	-4.42921	4.95492	51.426	127.959	68.9475	11	599.037	599.779	0.955867	0.000194978	123.702	121.964	125.245	125.102	131.154	128.117	129.513	129.824	130.914	133.801	68.9475	0.000780415	0.00234124	0.00702378	0.0210713	0.0632139	0.189642	0.568925	1.70678	5.12033	15.361	46.0829	Lansoprazole	NA	H+/K+-ATPase Inhibitor	CC1=C(C[S+]([O-])C2=NC3=C([NH]2)C=CC=C3)N=CC=C1OCC(F)(F)F
NCGC00015619-09	Loratadine	HRH1	Histamine H1 Receptor Antagonists	s-ewing-osteo-TC71-1	activity	4	-2.1	-4.57921	4.09497	4.08702	132.632	16.0079	11	599.399	597.425	0.978774	1.22215e-05	137.649	124.673	127.472	132.734	141.428	130.741	138.595	133.456	127.035	117.994	16.0079	0.000780415	0.00234124	0.00702378	0.0210713	0.0632139	0.189642	0.568925	1.70678	5.12033	15.361	46.0829	Loratadine	HRH1	Histamine H1 Receptor Antagonists	Clc3cc4CCc1cccnc1C(=C2/CCN(CC2)C(=O)OCC)\c4cc3
NCGC00015622-02	LY-294002	PIK3CA	PI3K Inhibitor	s-ewing-osteo-TC71-1	activity	2.1	-2.2	-4.72921	0.9	46.323	131.147	66.6465	11	579.257	579.97	0.954906	0.000211079	130.158	131.689	136.864	134.242	128.79	129.763	124.288	114.356	115.077	97.1411	66.6465	0.000780415	0.00234124	0.00702378	0.0210713	0.0632139	0.189642	0.568925	1.70678	5.12033	15.361	46.0829	LY-294002	PIK3CA	PI3K Inhibitor	O=C1\C=C(/OC2=C1C=CC=C2C3=CC=CC=C3)N4CCOCC4
NCGC00015646-04	Fomepizole	ADH1	Alcohol Dehydrogenase Inhibitor	s-ewing-osteo-TC71-1	activity	4	-1.1	-7.32921	1.111	2.80923	119.084	57.543	11	220.806	220.377	0.988505	5.6509e-06	120.84	113.93	101.504	92.382	41.6193	30.818	6.12371	5.17304	4.02209	3.74598	57.543	0.000780415	0.00234124	0.00702378	0.0210713	0.0632139	0.189642	0.568925	1.70678	5.12033	15.361	46.0829	Fomepizole	ADH1	Alcohol Dehydrogenase Inhibitor	CC1=C[NH]N=C1
NCGC00015647-03	Nocodazole	TUBB	Tubulin depolymerization inhibitor	s-ewing-osteo-TC71-1	activity	4	-1.1	-7.92921	1.47809	27.2997	123.288	27.1889	11	244.95	244.904	0.995611	2.52e-08	121.411	116.888	90.5991	58.6821	29.2603	29.6672	30.9003	25.1827	28.7925	27.0031	27.1889	0.000780415	0.00234124	0.00702378	0.0210713	0.0632139	0.189642	0.568925	1.70678	5.12033	15.361	46.0829	Nocodazole	TUBB	Tubulin depolymerization inhibitor	COC(=O)NC1=NC2=C([NH]1)C=CC(=C2)C(=O)C3=CC=CS3
NCGC00015649-05	Moxonidine hydrochloride hydrate	NISCH	Imidazoline I1 Receptor Agonists	s-ewing-osteo-TC71-1	activity	1.3	1.4	-7.87921	4.44947	118.252	103.252	123.54	11	550.109	549.078	0.791835	0.0344732	101.752	105.433	103.173	116.558	118.607	115.349	114.398	121.326	112.055	122.097	123.54	0.000780415	0.00234124	0.00702378	0.0210713	0.0632139	0.189642	0.568925	1.70678	5.12033	15.361	46.0829	Moxonidine hydrochloride hydrate	NISCH	Imidazoline I1 Receptor Agonists	COC1=NC(=NC(=C1N\C2=N\CCN2)Cl)C
NCGC00015656-06	Mianserin	HTR2A	5-HT2A Antagonists?	s-ewing-osteo-TC71-1	activity	2.3	-2.2	-4.77921	0.8	81.0735	127.799	91.7743	11	582.818	583.584	0.826446	0.0203661	122.799	125.824	124.405	134.865	125.741	136.733	120.26	118.176	113.116	109.914	91.7743	0.000780415	0.00234124	0.00702378	0.0210713	0.0632139	0.189642	0.568925	1.70678	5.12033	15.361	46.0829	Mianserin	HTR2A	5-HT2A Antagonists?	CN1CC2N(CC1)c4ccccc4Cc3ccccc23
NCGC00015672-01	Morin hydrate	CYP1A2	Cytochrome P450 CYP1A2 Inhibitor	s-ewing-osteo-TC71-1	activity	1.3	4	-5.67921	1.4641	128.048	140.181	127.153	11	657.036	657.644	0.775053	0.04283	140.181	145.925	136.228	138.334	141.094	139.203	138.566	137.047	127.52	131.329	127.153	0.000780415	0.00234124	0.00702378	0.0210713	0.0632139	0.189642	0.568925	1.70678	5.12033	15.361	46.0829	Morin hydrate	CYP1A2	Cytochrome P450 CYP1A2 Inhibitor	OC1=CC(=C(C=C1)\C2=C(O)\C(=O)C3=C(O2)C=C(O)C=C3O)O
NCGC00015673-08	Minoxidil	NA	K(ATP) Channel Activators	s-ewing-osteo-TC71-1	activity	2.3	4	-4.42921	4.95492	139.856	121.608	135.527	11	588.346	587.84	0.578038	0.189445	120.856	129.144	117.642	120.831	116.899	118.774	126.539	122.373	121.238	120.36	135.527	0.000780415	0.00234124	0.00702378	0.0210713	0.0632139	0.189642	0.568925	1.70678	5.12033	15.361	46.0829	Minoxidil	NA	K(ATP) Channel Activators	Nc1cc(nc(N)[n+]1[O-])N2CCCCC2
NCGC00015675-03	Milrinone	PDE3A	Phosphodiesterase III (PDE3) Inhibitor	s-ewing-osteo-TC71-1	activity	1.3	4	-8.67921	0.6	125.129	104.129	111.516	11	585.669	583.907	0.461246	0.32232	108.129	121.621	116.625	117.286	121.194	125.058	129.965	128.073	129.553	114.577	111.516	0.000780415	0.00234124	0.00702378	0.0210713	0.0632139	0.189642	0.568925	1.70678	5.12033	15.361	46.0829	Milrinone	PDE3A	Phosphodiesterase III (PDE3) Inhibitor	C\C1=C(\C=C(\C#N)C(=O)N1)C2=CC=NC=C2
NCGC00015680-14	Melatonin	NA	Free Radical Scavengers; NOS2 Expression Inhibitors; TH Expression Enhancers	s-ewing-osteo-TC71-1	activity	4	-1.1	-5.97921	4.09497	24.4858	124.38	23.6289	11	429.643	429.332	0.995376	3.1e-08	122.192	122.163	126.354	126.53	131.063	119.276	114.084	37.2669	26.7649	21.6712	23.6289	0.000780415	0.00234124	0.00702378	0.0210713	0.0632139	0.189642	0.568925	1.70678	5.12033	15.361	46.0829	Melatonin	NA	Free Radical Scavengers; NOS2 Expression Inhibitors; TH Expression Enhancers	COC1=CC2=C([NH]C=C2CCNC(C)=O)C=C1
NCGC00015682-02	MPEP	GRM5	mgluR5 Antagonists	s-ewing-osteo-TC71-1	activity	2.3	-3	-4.62921	0.9	87.7071	131.791	95.7223	11	609.902	603.041	0.646689	0.129932	135.798	127.491	123.701	125.037	133.356	132.387	132.194	124.866	115.19	126.826	95.7223	0.000780415	0.00234124	0.00702378	0.0210713	0.0632139	0.189642	0.568925	1.70678	5.12033	15.361	46.0829	MPEP	GRM5	mgluR5 Antagonists	CC1=CC=CC(=N1)C#CC2=CC=CC=C2
NCGC00015693-08	Mitoxantrone	TOP2A	DNA Topoisomerase II Inhibitors	s-ewing-osteo-TC71-1	activity	4	-1.1	-7.02921	3.132	10.9383	124.313	2.07868	11	288.72	292.203	0.990639	5.026e-07	118.653	127.853	123.842	125.34	99.9145	23.9054	6.19893	7.24159	18.5158	19.0958	2.07868	0.000780415	0.00234124	0.00702378	0.0210713	0.0632139	0.189642	0.568925	1.70678	5.12033	15.361	46.0829	Mitoxantrone	TOP2A	DNA Topoisomerase II Inhibitors	OCCNCCNC1=CC=C(NCCNCCO)C2=C1C(=O)C3=C(C(=CC=C3O)O)C2=O
NCGC00015697-11	Myricetin	CYP1A2	Cytochrome P450 CYP1A2 Inhibitor	s-ewing-osteo-TC71-1	activity	1.3	4	-5.77921	4.44947	125.44	142.14	123.307	11	658.477	659.063	0.769118	0.0457451	137.64	134.008	138.945	144.941	142.545	148.401	146.867	133.093	127.439	125.463	123.307	0.000780415	0.00234124	0.00702378	0.0210713	0.0632139	0.189642	0.568925	1.70678	5.12033	15.361	46.0829	Myricetin	CYP1A2	Cytochrome P450 CYP1A2 Inhibitor	OC1=CC2=C(C(=C1)O)C(=O)\C(=C(/O2)C3=CC(=C(O)C(=C3)O)O)O
NCGC00015705-04	Memantine	GRIN2A	NMDA Antagonist	s-ewing-osteo-TC71-1	activity	1.3	4	-7.82921	4.95492	131.118	122.929	131.139	11	619.982	619.924	0.374702	0.372221	123.618	132.009	113.461	130.672	132.573	129.65	128.477	132.417	127.309	135.615	131.139	0.000780415	0.00234124	0.00702378	0.0210713	0.0632139	0.189642	0.568925	1.70678	5.12033	15.361	46.0829	Memantine	GRIN2A	NMDA Antagonist	CC13CC2(C)CC(N)(C1)CC(C2)C3
NCGC00015708-17	Maprotiline hydrochloride	NA	noradrenaline reuptake inhibitor	s-ewing-osteo-TC71-1	activity	2.3	-2.2	-4.62921	4.09497	51.4568	122.719	56.9745	11	566.353	566.066	0.844647	0.014578	124.217	131.544	131.957	124.898	101.156	120.507	130.763	120.309	119.796	110.662	56.9745	0.000780415	0.00234124	0.00702378	0.0210713	0.0632139	0.189642	0.568925	1.70678	5.12033	15.361	46.0829	Maprotiline hydrochloride	NA	noradrenaline reuptake inhibitor	CNCCCC12CCC(C3=CC=CC=C13)C4=C2C=CC=C4
NCGC00015718-06	Naftopidil	ADRA1A	alpha1-Adrenoceptor Antagonists	s-ewing-osteo-TC71-1	activity	2.1	-2.2	-4.77921	1.41632	81.2711	124.621	86.6188	11	575.346	574.611	0.929211	0.00107925	124.816	120.866	126.534	128.569	126.773	120.155	126.957	118.278	116.73	107.317	86.6188	0.000780415	0.00234124	0.00702378	0.0210713	0.0632139	0.189642	0.568925	1.70678	5.12033	15.361	46.0829	Naftopidil	ADRA1A	alpha1-Adrenoceptor Antagonists	OC(CN1CCN(CC1)c2ccccc2OC)COc4cccc3ccccc34
NCGC00015724-14	Niflumic acid	PTGS2	Cyclooxygenase-2 Inhibitor	s-ewing-osteo-TC71-1	activity	1.3	4	-7.62921	4.95492	138.55	125.37	117.131	11	646.239	645.008	0.674917	0.132032	128.55	120.9	126.673	130.169	143.377	131.299	143.033	134.509	143.535	136.003	117.131	0.000780415	0.00234124	0.00702378	0.0210713	0.0632139	0.189642	0.568925	1.70678	5.12033	15.361	46.0829	Niflumic acid	PTGS2	Cyclooxygenase-2 Inhibitor	OC(=O)C1=C(NC2=CC=CC(=C2)C(F)(F)F)N=CC=C1
NCGC00015725-16	Nimesulide	PTGS2	Cyclooxygenase-2 Inhibitor	s-ewing-osteo-TC71-1	activity	2.1	-2.2	-4.77921	1.55795	82.5884	140.049	91.4894	11	642.514	642.627	0.963664	9.45716e-05	143.495	139.326	138.714	133.836	140.108	145.944	141.06	137.827	131.427	114.355	91.4894	0.000780415	0.00234124	0.00702378	0.0210713	0.0632139	0.189642	0.568925	1.70678	5.12033	15.361	46.0829	Nimesulide	PTGS2	Cyclooxygenase-2 Inhibitor	C[S+]([O-])(=O)NC1=C(OC2=CC=CC=C2)C=C(C=C1)[N+]([O-])=O
NCGC00015735-12	Niclosamide	STAT3	STAT-3 Inhibitor	s-ewing-osteo-TC71-1	activity	4	-1.1	-5.87921	3.98997	20.8949	115.33	7.64456	11	403.89	408.568	0.939327	0.000621875	107.502	119.091	110.143	115.174	119.084	115.875	117.459	44.806	49.2834	7.2623	7.64456	0.000780415	0.00234124	0.00702378	0.0210713	0.0632139	0.189642	0.568925	1.70678	5.12033	15.361	46.0829	Niclosamide	STAT3	STAT-3 Inhibitor	OC1=C(C=C(Cl)C=C1)C(=O)NC2=C(Cl)C=C(C=C2)[N+]([O-])=O
NCGC00015754-15	Nilutamide	AR	Androgen Receptor Antagonist	s-ewing-osteo-TC71-1	activity	1.3	-2.4	-5.02921	0.5	97.5502	128.351	104.517	11	585.005	584.791	0.829933	0.0192204	129.351	133.145	120.629	125.339	127.982	125.635	118.334	122.356	115.457	112.093	104.517	0.000780415	0.00234124	0.00702378	0.0210713	0.0632139	0.189642	0.568925	1.70678	5.12033	15.361	46.0829	Nilutamide	AR	Androgen Receptor Antagonist	CC1(C)NC(=O)N(C2=CC(=C(C=C2)[N+]([O-])=O)C(F)(F)F)C1=O
NCGC00015766-08	Oxymetazoline	ADRA1A	alpha1A/2A-Adrenoceptor Agonists	s-ewing-osteo-TC71-1	activity	2.1	-3	-4.47921	4.95492	20.4115	110.522	34.9382	11	509.667	512.276	0.906432	0.00283077	98.0717	102.456	106.835	105.708	110.884	119.125	123.938	110.195	113.356	112.085	34.9382	0.000780415	0.00234124	0.00702378	0.0210713	0.0632139	0.189642	0.568925	1.70678	5.12033	15.361	46.0829	Oxymetazoline	ADRA1A	alpha1A/2A-Adrenoceptor Agonists	CC(C)(C)c2cc(C)c(CC1=NCCN1)c(C)c2O
NCGC00015767-09	Oxybutynin chloride	NA	Muscarinic Antagonists	s-ewing-osteo-TC71-1	activity	2.3	4	-4.42921	4.95492	83.0966	110.472	89.6591	11	525.268	526.97	0.647078	0.129861	102.472	104.883	108.851	105.569	117.425	111.783	113.599	114.206	114.672	110.767	89.6591	0.000780415	0.00234124	0.00702378	0.0210713	0.0632139	0.189642	0.568925	1.70678	5.12033	15.361	46.0829	Oxybutynin chloride	NA	Muscarinic Antagonists	CCN(CC)CC#CCOC(=O)C(O)(C1CCCCC1)C2=CC=CC=C2
NCGC00015771-12	Orphenadrine hydrochloride	NA	Muscarinic Antagonists	s-ewing-osteo-TC71-1	activity	1.3	4	-7.97921	4.95492	107.396	98.396	90.7186	11	505.867	505.811	0.600601	0.197275	96.396	101.097	99.0887	109.886	103.821	105.613	111.249	112.896	103.88	104.43	90.7186	0.000780415	0.00234124	0.00702378	0.0210713	0.0632139	0.189642	0.568925	1.70678	5.12033	15.361	46.0829	Orphenadrine hydrochloride	NA	Muscarinic Antagonists	CN(C)CCOC(C1=CC=CC=C1)C2=C(C)C=CC=C2
NCGC00015772-13	Ofloxacin	NA	DNA Topoisomerase IV Inhibitors; Antibiotic	s-ewing-osteo-TC71-1	activity	2.3	-3	-4.67921	1.96734	99.9348	131.529	100.614	11	618.745	617.518	0.79247	0.0341111	134.553	130.222	129.546	130.629	132.396	128.283	128.331	140.852	123.673	125.271	100.614	0.000780415	0.00234124	0.00702378	0.0210713	0.0632139	0.189642	0.568925	1.70678	5.12033	15.361	46.0829	Ofloxacin	NA	DNA Topoisomerase IV Inhibitors; Antibiotic	CC1COC2=C3N1\C=C(C(O)=O)/C(=O)C3=CC(=C2N4CCN(C)CC4)F
NCGC00015785-04	Progesterone	PGR	Progestogen hormone	s-ewing-osteo-TC71-1	activity	4	-1.1	-5.47921	4.95492	4.39662	110.416	6.50654	11	403.993	406.901	0.98332	4.8118e-06	98.4968	111.083	103.999	109.394	113.245	108.621	118.931	116.654	12.4946	5.41783	6.50654	0.000780415	0.00234124	0.00702378	0.0210713	0.0632139	0.189642	0.568925	1.70678	5.12033	15.361	46.0829	Progesterone	PGR	Progestogen hormone	CC(=O)[C@H]2CC[C@H]3[C@@H]4CCC1=CC(=O)CC[C@]1(C)[C@H]4CC[C@]23C
NCGC00015790-02	PD-098059	MAP2K1	Mek 1/2 inhibitor	s-ewing-osteo-TC71-1	activity	2.3	-2.4	-4.72921	2.18762	87.9191	127.423	90.6214	11	594.357	595.707	0.591273	0.176756	116.84	112.599	117.623	134.321	128.638	132.404	141.452	138.637	118.613	113.796	90.6214	0.000780415	0.00234124	0.00702378	0.0210713	0.0632139	0.189642	0.568925	1.70678	5.12033	15.361	46.0829	PD-098059	MAP2K1	Mek 1/2 inhibitor	COC1=CC=CC(=C1N)\C2=C\C(=O)C3=C(O2)C=CC=C3
NCGC00015810-13	Papaverine hydrochloride	PDE10A	Phosphodiesterase X (PDE10) inhibitor	s-ewing-osteo-TC71-1	activity	2.1	-2.2	-4.72921	2.33317	72.6678	136.058	73.0866	11	625.205	626.829	0.903742	0.00311649	129.058	138.897	138.117	134.604	144.923	137.773	140.293	123.624	132.237	116.805	73.0866	0.000780415	0.00234124	0.00702378	0.0210713	0.0632139	0.189642	0.568925	1.70678	5.12033	15.361	46.0829	Papaverine hydrochloride	PDE10A	Phosphodiesterase X (PDE10) inhibitor	COC1=C(OC)C=C(CC2=C3C=C(OC)C(=CC3=CC=N2)OC)C=C1
NCGC00015818-15	Praziquantel	NA	antiparasitic agent	s-ewing-osteo-TC71-1	activity	2.3	-2.4	-4.42921	4.95492	86.621	125.124	96.5382	11	593.369	592.29	0.798533	0.0313929	128.624	132.194	116.542	120.943	123.563	127.2	121.187	125.801	127.426	126.775	96.5382	0.000780415	0.00234124	0.00702378	0.0210713	0.0632139	0.189642	0.568925	1.70678	5.12033	15.361	46.0829	Praziquantel	NA	antiparasitic agent	O=C1CN(CC2N1CCC3=C2C=CC=C3)C(=O)C4CCCCC4
NCGC00015819-11	Propafenone hydrochloride	NA	anti-arrythmia drug	s-ewing-osteo-TC71-1	activity	1.3	-2.2	-4.82921	3.51175	82.9687	116.05	83.0395	11	540.147	541.882	0.823866	0.0212775	111.036	106.553	112.051	122.35	118.267	114.608	119.415	123.325	116.893	99.065	83.0395	0.000780415	0.00234124	0.00702378	0.0210713	0.0632139	0.189642	0.568925	1.70678	5.12033	15.361	46.0829	Propafenone hydrochloride	NA	anti-arrythmia drug	CCCNCC(O)COC1=C(C=CC=C1)C(=O)CCC2=CC=CC=C2
NCGC00015823-18	Piroxicam	PTGS1	Cyclooxygenase Inhibitor	s-ewing-osteo-TC71-1	activity	2.1	-3	-4.42921	4.95492	46.7039	120.705	64.2013	11	564.7	564.635	0.931808	0.000944476	118.881	117.738	118.806	124.699	121.484	118.434	124.058	123.039	111.147	127.708	64.2013	0.000780415	0.00234124	0.00702378	0.0210713	0.0632139	0.189642	0.568925	1.70678	5.12033	15.361	46.0829	Piroxicam	PTGS1	Cyclooxygenase Inhibitor	CN1\C(=C(\O)C2=C(C=CC=C2)[S+]1([O-])=O)C(=O)NC3=CC=CC=N3
NCGC00015830-07	Phenelzine	MAOA	MAO Inhibitor	s-ewing-osteo-TC71-1	activity	4	-2.1	-4.67921	4.09497	-6.57234	129.374	3.85294	11	571.562	572.565	0.968598	5.45224e-05	134.169	127	131.6	135.821	119.007	140.854	121.205	133.061	122.222	99.9735	3.85294	0.000780415	0.00234124	0.00702378	0.0210713	0.0632139	0.189642	0.568925	1.70678	5.12033	15.361	46.0829	Phenelzine	MAOA	MAO Inhibitor	NNCCC1=CC=CC=C1
NCGC00015833-16	Pyrazinamide	FAS	Fatty acid synthase inhibitor	s-ewing-osteo-TC71-1	activity	1.3	4	-7.12921	4.95492	133.419	119.352	119.096	11	613.127	611.406	0.841571	0.0239656	122.919	114.53	117.623	121.82	123.046	135.55	128.559	136.517	134.633	131.941	119.096	0.000780415	0.00234124	0.00702378	0.0210713	0.0632139	0.189642	0.568925	1.70678	5.12033	15.361	46.0829	Pyrazinamide	FAS	Fatty acid synthase inhibitor	NC(=O)C1=CN=CC=N1
NCGC00015834-11	Primidone	NA	anticonvulsant agent	s-ewing-osteo-TC71-1	activity	4	-1.1	-4.92921	4.95492	11.088	116.368	11.2857	11	490.089	492.847	0.986762	1.9562e-06	110.161	114.281	111.209	117.433	122.942	114.456	120.45	124.148	113.003	33.476	11.2857	0.000780415	0.00234124	0.00702378	0.0210713	0.0632139	0.189642	0.568925	1.70678	5.12033	15.361	46.0829	Primidone	NA	anticonvulsant agent	CCC1(C(=O)NCNC1=O)c2ccccc2
NCGC00015840-09	Phloretin	ICAM1	ICAM1 Expression Inhibitors; VCAM1 Expression Inhibitors	s-ewing-osteo-TC71-1	activity	1.1	-1.2	-6.37921	4.95492	45.8738	110.603	37.2283	11	395.268	399.466	0.959136	0.000146451	104.103	113.452	107.308	109.141	105.788	124.031	54.8392	53.1169	50.0196	46.1168	37.2283	0.000780415	0.00234124	0.00702378	0.0210713	0.0632139	0.189642	0.568925	1.70678	5.12033	15.361	46.0829	Phloretin	ICAM1	ICAM1 Expression Inhibitors; VCAM1 Expression Inhibitors	OC1=CC=C(CCC(=O)C2=C(O)C=C(O)C=C2O)C=C1
NCGC00015848-04	Tranylcypromine	MAOA	MAO-A/B Inhibitor	s-ewing-osteo-TC71-1	activity	1.3	4	-4.87921	3.132	112.558	131.7	112.999	11	621.804	624.046	0.833519	0.0180675	125.2	133.71	133.761	136.849	133.275	131.332	130.28	130.781	130.74	119.722	112.999	0.000780415	0.00234124	0.00702378	0.0210713	0.0632139	0.189642	0.568925	1.70678	5.12033	15.361	46.0829	Tranylcypromine	MAOA	MAO-A/B Inhibitor	NC1CC1C2=CC=CC=C2
NCGC00015856-08	Prochlorperazine dimaleate	DRD2	Dopamine D2 Antagonist	s-ewing-osteo-TC71-1	activity	2.1	-3	-4.57921	4.09497	30.5597	115.422	38.373	11	529.627	531.063	0.953121	0.000243498	108.332	112.382	113.214	111.047	114.87	113.14	121.94	126.588	117.735	105.939	38.373	0.000780415	0.00234124	0.00702378	0.0210713	0.0632139	0.189642	0.568925	1.70678	5.12033	15.361	46.0829	Prochlorperazine dimaleate	DRD2	Dopamine D2 Antagonist	O=C(O)/C=C\C(=O)O.O=C(O)/C=C\C(=O)O.CN1CCN(CC1)CCCN2c4ccccc4Sc3ccc(Cl)cc23
NCGC00015870-16	Quercetine	NA	flavanoid	s-ewing-osteo-TC71-1	activity	4	-2.1	-4.72921	2.33317	12.5623	129.935	14.7916	11	571.266	569.784	0.974116	2.61549e-05	126.257	125.703	132.687	128.989	131.123	131.435	132.243	137.382	114.692	88.334	14.7916	0.000780415	0.00234124	0.00702378	0.0210713	0.0632139	0.189642	0.568925	1.70678	5.12033	15.361	46.0829	Quercetine	NA	flavanoid	OC1=CC2=C(C(=C1)O)C(=O)\C(=C(/O2)C3=CC(=C(O)C=C3)O)O
NCGC00015871-07	Quinidine	CYP2D6	antimalarial agents; Cytochrome P450 CYP2D6 Inhibitors	s-ewing-osteo-TC71-1	activity	1.1	-2.2	-5.37921	0.9	90.697	153.826	95.6181	11	668.017	670.962	0.962878	0.000102397	145.224	157.661	154.438	155.709	152.948	155.32	139.872	136.883	117.037	108.88	95.6181	0.000780415	0.00234124	0.00702378	0.0210713	0.0632139	0.189642	0.568925	1.70678	5.12033	15.361	46.0829	Quinidine	CYP2D6	antimalarial agents; Cytochrome P450 CYP2D6 Inhibitors	[H]C(O)(C1=CC=NC2=CC=C(OC)C=C12)[C@@]3([H])CC4CCN3C[C@]4([H])C=C
NCGC00015882-09	Riluzole	GRM1	Glutamate Release Inhibitor	s-ewing-osteo-TC71-1	activity	2.1	-2.2	-4.62921	4.09497	51.4994	133.922	57.973	11	616.52	616.762	0.97541	2.15067e-05	136.016	130.782	131.048	135.646	138.705	132.831	138.907	126.691	133.892	122.872	57.973	0.000780415	0.00234124	0.00702378	0.0210713	0.0632139	0.189642	0.568925	1.70678	5.12033	15.361	46.0829	Riluzole	GRM1	Glutamate Release Inhibitor	FC(F)(F)Oc1ccc2nc(N)sc2c1
NCGC00015883-08	Risperidone???	DRD2	Dopamine D2 Antagonist	s-ewing-osteo-TC71-1	activity	1.3	4	-5.62921	4.95492	100.148	112.005	97.4394	11	522.952	525.636	0.44083	0.313012	103.505	105.185	107.086	116.282	112.976	121.855	117.715	110.214	94.874	107.786	97.4394	0.000780415	0.00234124	0.00702378	0.0210713	0.0632139	0.189642	0.568925	1.70678	5.12033	15.361	46.0829	Risperidone???	DRD2	Dopamine D2 Antagonist	CC/1=C(\CCN2CCC(CC2)C3=NOC4=C3C=CC(=C4)F)C(=O)N/5CCCCC5=N1
NCGC00015884-09	Rilmenidine	NISCH	Imidazoline I1 Receptor Agonists	s-ewing-osteo-TC71-1	activity	1.3	4	-7.87921	4.95492	110.876	102.015	113.821	11	522.168	520.744	0.666354	0.11509	104.376	99.4916	102.138	109.952	111.789	108.545	107.544	114.869	106.023	113.528	113.821	0.000780415	0.00234124	0.00702378	0.0210713	0.0632139	0.189642	0.568925	1.70678	5.12033	15.361	46.0829	Rilmenidine	NISCH	Imidazoline I1 Receptor Agonists	C1CC1C(NC2=NCCO2)C3CC3
NCGC00015887-05	Ritodrine hydrochloride	ADRB2	beta2-Adrenoceptor Agonists	s-ewing-osteo-TC71-1	activity	2.3	4	-4.62921	1.55795	112.023	134.328	117.824	11	636.394	636.727	0.655514	0.123257	136.828	129.094	137.24	135.782	129.311	137.161	131.593	141.268	129.717	127.276	117.824	0.000780415	0.00234124	0.00702378	0.0210713	0.0632139	0.189642	0.568925	1.70678	5.12033	15.361	46.0829	Ritodrine hydrochloride	ADRB2	beta2-Adrenoceptor Agonists	CC(NCCC1=CC=C(O)C=C1)C(O)C2=CC=C(O)C=C2
NCGC00015888-04	Reserpine	NA	Alkaloid anitpsychotic	s-ewing-osteo-TC71-1	activity	4	-1.1	-5.57921	4.95492	24.8825	140.543	25.0941	11	529.694	532.025	0.989493	7.914e-07	130.919	130.699	144.996	145.318	144.64	145.392	142.218	128.21	25.7431	27.9861	25.0941	0.000780415	0.00234124	0.00702378	0.0210713	0.0632139	0.189642	0.568925	1.70678	5.12033	15.361	46.0829	Reserpine	NA	Alkaloid anitpsychotic	COC1C(CC2CN3CCC4=C(NC5=CC(OC)=CC=C45)C3CC2C1C(=O)OC)OC(=O)C6=CC(OC)=C(OC)C(OC)=C6
NCGC00015889-10	Raloxifene hydrochloride	ESR1	Selective Estrogen Receptor Modulators (SERM)	s-ewing-osteo-TC71-1	activity	1.1	-1.1	-5.12921	1.62662	25.1817	123.829	33.9131	11	512.047	509.092	0.975961	1.97126e-05	128.82	117.693	122.404	126.481	118.994	116.173	127.478	119.804	93.3086	40.7871	33.9131	0.000780415	0.00234124	0.00702378	0.0210713	0.0632139	0.189642	0.568925	1.70678	5.12033	15.361	46.0829	Raloxifene hydrochloride	ESR1	Selective Estrogen Receptor Modulators (SERM)	OC1=CC=C(C=C1)C2=C(C(=O)C3=CC=C(OCCN4CCCCC4)C=C3)C5=C(S2)C=C(O)C=C5
NCGC00015892-07	Rutaecarpine	PTGS2	Cyclooxygenase-2 Inhibitor	s-ewing-osteo-TC71-1	activity	2.3	4	-5.22921	4.44947	130.874	121.292	121.443	11	591.75	591.059	0.371207	0.40045	121.874	112.223	122.109	126.838	123.252	125.546	120.237	116.537	124.85	131.029	121.443	0.000780415	0.00234124	0.00702378	0.0210713	0.0632139	0.189642	0.568925	1.70678	5.12033	15.361	46.0829	Rutaecarpine	PTGS2	Cyclooxygenase-2 Inhibitor	O=C1N\2CCC3=C([NH]C4=C3C=CC=C4)C2=N/C5=CC=CC=C15
NCGC00015897-06	Ranolazine	SCN9A	Sodium channel inhibitor	s-ewing-osteo-TC71-1	activity	1.3	4	-7.82921	4.95492	127.765	116.319	135.311	11	599.782	598.525	0.374227	0.371871	114.765	121.235	113.066	127.327	131.035	133.126	130.003	111.06	129.915	122.6	135.311	0.000780415	0.00234124	0.00702378	0.0210713	0.0632139	0.189642	0.568925	1.70678	5.12033	15.361	46.0829	Ranolazine	SCN9A	Sodium channel inhibitor	COC1=C(OCC(O)CN2CCN(CC2)CC(=O)NC3=C(C)C=CC=C3C)C=CC=C1
NCGC00015898-12	Rolipram	PDE4A	Phosphodiesterase IIII (PDE4) inhibitor	s-ewing-osteo-TC71-1	activity	1.3	4	-7.02921	1.69245	124.431	110.837	108.784	11	569.837	568.375	0.847402	0.0217057	113.431	108.378	113.295	108.353	117.521	119.111	125.414	127.925	123.487	121.365	108.784	0.000780415	0.00234124	0.00702378	0.0210713	0.0632139	0.189642	0.568925	1.70678	5.12033	15.361	46.0829	Rolipram	PDE4A	Phosphodiesterase IIII (PDE4) inhibitor	COC1=C(OC2CCCC2)C=C(C=C1)C3CNC(=O)C3
NCGC00015917-07	SB-206553	HTR1A	5-HT1A Receptor Partial Agonist	s-ewing-osteo-TC71-1	activity	2.1	-2.1	-4.62921	4.09497	34.9607	124.096	41.4007	11	567.072	568.066	0.931238	0.000972116	122.346	113.104	119.918	121.168	125.198	118.289	138.91	129.452	128.568	111.056	41.4007	0.000780415	0.00234124	0.00702378	0.0210713	0.0632139	0.189642	0.568925	1.70678	5.12033	15.361	46.0829	SB-206553	HTR1A	5-HT1A Receptor Partial Agonist	C[N]1C=CC2=CC3=C(CCN3C(=O)NC4=CC=CN=C4)C=C12
NCGC00015918-05	SB-224289	HTR1B	5-HT1B Agonist	s-ewing-osteo-TC71-1	activity	1.3	4	-7.67921	2.72022	133.582	126.112	131.974	11	631.412	630.925	0.381918	0.366241	130.582	126.768	120.607	131.281	131.333	138.263	139.824	135.638	131.231	126.333	131.974	0.000780415	0.00234124	0.00702378	0.0210713	0.0632139	0.189642	0.568925	1.70678	5.12033	15.361	46.0829	SB-224289	HTR1B	5-HT1B Agonist	CN1CCC2(CC1)COC3=CC4=C(C=C23)N(CC4)C(=O)C5=CC=C(C=C5)C6=C(C)C=C(C=C6)C7=NOC(=N7)C
NCGC00015919-04	Sotalol	ADRB1	beta-Adrenoceptor Antagonists	s-ewing-osteo-TC71-1	activity	2.1	-2.2	-4.77921	1.47809	62.6452	122.617	69.6836	11	556.985	557.465	0.91114	0.0023756	120.177	114.536	120.241	123.388	121.634	130.679	130.886	120.189	108.699	98.0364	69.6836	0.000780415	0.00234124	0.00702378	0.0210713	0.0632139	0.189642	0.568925	1.70678	5.12033	15.361	46.0829	Sotalol	ADRB1	beta-Adrenoceptor Antagonists	O=S(C)(=O)Nc1ccc(cc1)C(O)CNC(C)C
NCGC00015924-13	Synephrine	ADRA1A	alpha1-Adrenoceptor Agonists	s-ewing-osteo-TC71-1	activity	1.1	1.1	-8.87921	4.09497	124.363	18.9281	120.932	11	570.775	570.593	0.964554	8.60809e-05	29.2245	114.563	112.835	117.839	126.22	129.04	127.053	128.683	123.428	132.188	120.932	0.000780415	0.00234124	0.00702378	0.0210713	0.0632139	0.189642	0.568925	1.70678	5.12033	15.361	46.0829	Synephrine	ADRA1A	alpha1-Adrenoceptor Agonists	CNCC(O)C1=CC=C(O)C=C1
NCGC00015925-13	Sulfaphenazole	NA	Antibiotic	s-ewing-osteo-TC71-1	activity	1.3	4	-6.37921	0.3	127.338	109.641	129.087	11	565.64	564.556	0.313916	0.422987	111.338	111.621	112.842	122.912	111.778	112.503	116.935	126.949	127.993	109.924	129.087	0.000780415	0.00234124	0.00702378	0.0210713	0.0632139	0.189642	0.568925	1.70678	5.12033	15.361	46.0829	Sulfaphenazole	NA	Antibiotic	NC1=CC=C(C=C1)[S+]([O-])(=O)NC2=CC=N[N]2C3=CC=CC=C3
NCGC00015937-02	Spermidine	GRIN2A	Drugs Acting on NMDA Receptors	s-ewing-osteo-TC71-1	activity	5	4	NA	NA	NA	NA	124.953	11	NA	613.173	NA	NA	120.503	130.971	115.49	129.714	130.617	126.458	132.803	130.374	133.798	122.919	124.953	0.000780415	0.00234124	0.00702378	0.0210713	0.0632139	0.189642	0.568925	1.70678	5.12033	15.361	46.0829	Spermidine	GRIN2A	Drugs Acting on NMDA Receptors	NCCCCNCCCN
NCGC00015950-07	SB-415286	GSK3B	GSK-3 inhibitor	s-ewing-osteo-TC71-1	activity	2.3	-3	-4.42921	4.95492	60.6514	127.371	75.3216	11	598.264	600.61	0.873053	0.00775336	118.893	121.617	117.499	129.981	129.668	126.123	131.065	132.502	134.881	132.782	75.3216	0.000780415	0.00234124	0.00702378	0.0210713	0.0632139	0.189642	0.568925	1.70678	5.12033	15.361	46.0829	SB-415286	GSK3B	GSK-3 inhibitor	OC1=C(Cl)C=C(N\C2=C(\C(=O)NC2=O)C3=C(C=CC=C3)[N+]([O-])=O)C=C1
NCGC00015955-09	Albuterol	ADRB2	beta2-Adrenoceptor Agonists	s-ewing-osteo-TC71-1	activity	1.3	4	-5.22921	3.06545	123.805	130.81	125.855	11	622.279	622.606	0.520896	0.242634	128.31	130.801	136.338	130.489	127.031	129.891	133.768	129.844	128.274	122.056	125.855	0.000780415	0.00234124	0.00702378	0.0210713	0.0632139	0.189642	0.568925	1.70678	5.12033	15.361	46.0829	Albuterol	ADRB2	beta2-Adrenoceptor Agonists	OCc1cc(ccc1O)C(O)CNC(C)(C)C
NCGC00015958-02	SP-600125	MAPK8	JNK 1/2/3 Inhibitor	s-ewing-osteo-TC71-1	activity	2.3	-3	-4.47921	4.50447	48.2405	119.348	61.5675	11	556.759	557.437	0.857472	0.0111771	114.244	118.626	121.413	129.484	122.595	126.587	119.959	117.485	102.055	117.653	61.5675	0.000780415	0.00234124	0.00702378	0.0210713	0.0632139	0.189642	0.568925	1.70678	5.12033	15.361	46.0829	SP-600125	MAPK8	JNK 1/2/3 Inhibitor	O=C1C2=C(C=CC=C2)C3=N[NH]C4=CC=CC1=C34
NCGC00015962-02	SB-202190	MAPK14	p38 MAPK Inhibitor	s-ewing-osteo-TC71-1	activity	2.1	-2.2	-4.67921	4.09497	27.7306	108.153	32.8745	11	490.103	493.637	0.932689	0.000901399	98.6534	114.954	114.597	117.756	112.225	105.719	108.518	102.457	100.953	89.2317	32.8745	0.000780415	0.00234124	0.00702378	0.0210713	0.0632139	0.189642	0.568925	1.70678	5.12033	15.361	46.0829	SB-202190	MAPK14	p38 MAPK Inhibitor	OC1=CC=C(C=C1)C2=NC(=C([NH]2)C3=CC=C(F)C=C3)C4=CC=NC=C4
NCGC00015966-03	Levosulpiride	DRD2	Dopamine D2 Antagonist	s-ewing-osteo-TC71-1	activity	2.3	-2.2	-4.77921	3.51175	92.555	125.581	91.0719	11	587.774	588.931	0.810552	0.0263119	113.991	123.372	131.518	129.49	125.271	121.636	122.265	130.974	128.815	111.706	91.0719	0.000780415	0.00234124	0.00702378	0.0210713	0.0632139	0.189642	0.568925	1.70678	5.12033	15.361	46.0829	Levosulpiride	DRD2	Dopamine D2 Antagonist	CCN1CCCC1CNC(=O)C2=C(OC)C=CC(=C2)[S+](N)([O-])=O
NCGC00015970-10	Sulindac	NA	non-steroidal antiinflammatory	s-ewing-osteo-TC71-1	activity	1.1	-1.1	-5.87921	4.44947	46.6133	147.011	34.9903	11	546.016	549.641	0.984674	3.462e-06	144.641	147.53	150.23	142.508	148.823	141.981	153.463	69.7185	55.1254	50.2017	34.9903	0.000780415	0.00234124	0.00702378	0.0210713	0.0632139	0.189642	0.568925	1.70678	5.12033	15.361	46.0829	Sulindac	NA	non-steroidal antiinflammatory	C[S+]([O-])C1=CC=C(C=C1)\C=C2\C(=C(\CC(O)=O)C3=C2C=CC(=C3)F)C
NCGC00015977-02	SK&F-89976A	SLC6A1	GAT-1 Inhibitor	s-ewing-osteo-TC71-1	activity	4	-1.1	-5.02921	4.95492	5.92219	122.265	5.46488	11	501.992	501.839	0.981177	7.6864e-06	119.793	116.594	110.195	114.689	129.071	127.271	128.558	126.134	121.293	14.9658	5.46488	0.000780415	0.00234124	0.00702378	0.0210713	0.0632139	0.189642	0.568925	1.70678	5.12033	15.361	46.0829	SK&F-89976A	SLC6A1	GAT-1 Inhibitor	OC(=O)C1CCCN(CCC=C(C2=CC=CC=C2)C3=CC=CC=C3)C1
NCGC00015989-16	Thalidomide	TNF	TNF-alpha Production Inhibitors	s-ewing-osteo-TC71-1	activity	1.3	4	-6.12921	0.3	118.088	150.37	126.005	11	657.709	656.931	0.674404	0.108142	147.87	153.033	134.077	137.67	139.412	146.866	132.365	132.146	129.031	125.968	126.005	0.000780415	0.00234124	0.00702378	0.0210713	0.0632139	0.189642	0.568925	1.70678	5.12033	15.361	46.0829	Thalidomide	TNF	TNF-alpha Production Inhibitors	O=C1CCC(N2C(=O)C3=C(C=CC=C3)C2=O)C(=O)N1
NCGC00015997-06	l-Taurine	NA	amino acid antipsychotic	s-ewing-osteo-TC71-1	activity	2.3	4	-4.72921	1.1	101.5	133.161	109.194	11	622.57	621.815	0.513917	0.246373	135.161	122.856	124.673	135.427	138.251	134.335	148.284	122.075	125.99	121.086	109.194	0.000780415	0.00234124	0.00702378	0.0210713	0.0632139	0.189642	0.568925	1.70678	5.12033	15.361	46.0829	l-Taurine	NA	amino acid antipsychotic	NCCS(=O)(=O)O
NCGC00016000-10	Disulfiram	ALDH2	Aldehyde Dehydrogenase (ALDH2) Inhibitors	s-ewing-osteo-TC71-1	activity	4	-1.1	-7.87921	2.33317	29.8377	116.332	2.27365	11	249.665	254.937	0.917509	0.00183787	121.084	108.456	102.911	49.2244	34.6755	26.708	35.2434	32.2394	47.2081	35.8092	2.27365	0.000780415	0.00234124	0.00702378	0.0210713	0.0632139	0.189642	0.568925	1.70678	5.12033	15.361	46.0829	Disulfiram	ALDH2	Aldehyde Dehydrogenase (ALDH2) Inhibitors	CCN(CC)C(=S)SSC(=S)N(CC)CC
NCGC00016014-08	Tyrphostin B42	JAK2	Jak2/3 Inhibitor	s-ewing-osteo-TC71-1	activity	2.1	-2.1	-4.62921	4.09497	23.4139	124.273	30.956	11	564.054	564.371	0.965161	8.06728e-05	125.232	123.478	130.554	127.741	130.529	129.409	123.236	117.929	113.268	106.33	30.956	0.000780415	0.00234124	0.00702378	0.0210713	0.0632139	0.189642	0.568925	1.70678	5.12033	15.361	46.0829	Tyrphostin B42	JAK2	Jak2/3 Inhibitor	OC1=C(O)C=C(C=C1)\C=C(/C#N)C(=O)NCC2=CC=CC=C2
NCGC00016017-07	AG-1478	EGFR	EGFR (HER1; erbB1) inhibitor	s-ewing-osteo-TC71-1	activity	4	-1.1	-5.37921	3.132	23.6407	146.367	26.9636	11	570.563	569.755	0.987238	1.6952e-06	142.916	148.347	159.009	143.324	139.02	140.74	143.562	143.618	68.6319	20.9576	26.9636	0.000780415	0.00234124	0.00702378	0.0210713	0.0632139	0.189642	0.568925	1.70678	5.12033	15.361	46.0829	AG-1478	EGFR	EGFR (HER1; erbB1) inhibitor	COC1=CC2=NC=NC(=C2C=C1OC)NC3=CC=CC(=C3)Cl
NCGC00016023-17	Theobromine	PDE4A	cAMP Phosphodiesterase Inhibitors	s-ewing-osteo-TC71-1	activity	4	-2.1	-4.62921	4.09497	-6.43362	122.834	3.70344	11	547.765	548.924	0.966349	7.07872e-05	121.576	119.279	124.525	125.401	124.73	128.479	129.461	128.184	104.99	102.527	3.70344	0.000780415	0.00234124	0.00702378	0.0210713	0.0632139	0.189642	0.568925	1.70678	5.12033	15.361	46.0829	Theobromine	PDE4A	cAMP Phosphodiesterase Inhibitors	C[N]1C=NC2=C1C(=O)NC(=O)N2C
NCGC00016024-06	Taxifolin	NA	flavanoid	s-ewing-osteo-TC71-1	activity	4	-3	-4.47921	4.95492	10.3878	126.553	29.2941	11	580.486	583.503	0.900572	0.00347398	115.643	105.701	124.15	129.339	122.065	134.829	138.048	130.643	138.39	125.157	29.2941	0.000780415	0.00234124	0.00702378	0.0210713	0.0632139	0.189642	0.568925	1.70678	5.12033	15.361	46.0829	Taxifolin	NA	flavanoid	OC1C(OC2=C(C(=CC(=C2)O)O)C1=O)C3=CC(=C(O)C=C3)O
NCGC00016026-11	Terazosin hydrochloride	ADRA1A	alpha1-Adrenoceptor Antagonists	s-ewing-osteo-TC71-1	activity	2.3	-3	-4.47921	4.95492	55.4902	114.416	65.1797	11	535.85	539.064	0.832232	0.0183979	102.738	106.951	115.398	108.701	114.04	119.455	116.509	126.958	119.994	113.023	65.1797	0.000780415	0.00234124	0.00702378	0.0210713	0.0632139	0.189642	0.568925	1.70678	5.12033	15.361	46.0829	Terazosin hydrochloride	ADRA1A	alpha1-Adrenoceptor Antagonists	COC1=CC2=NC(=NC(=C2C=C1OC)N)N3CCN(CC3)C(=O)C4CCCO4
NCGC00016035-12	Trazodone hydrochloride	ADRA2A	alpha2-Adrenoceptor Antagonists	s-ewing-osteo-TC71-1	activity	1.3	4	-7.97921	1.2221	119.871	100.953	102.831	11	554.516	551.793	0.732314	0.0871014	103.871	100.606	109.535	115.374	114.68	117.986	124.586	127.084	117.842	112.355	102.831	0.000780415	0.00234124	0.00702378	0.0210713	0.0632139	0.189642	0.568925	1.70678	5.12033	15.361	46.0829	Trazodone hydrochloride	ADRA2A	alpha2-Adrenoceptor Antagonists	ClC1=CC(=CC=C1)N2CCN(CCCN3\N=C4\C=C/C=C\N4C3=O)CC2
NCGC00016083-13	Verapamil	DRD2	Calcium Channel Blocker	s-ewing-osteo-TC71-1	activity	1.3	4	-5.31797	4.95492	112.489	128.021	112.56	11	616.059	615.442	0.743491	0.0604059	128.521	130.369	130.513	122.683	134.46	119.66	127.571	126.387	110.577	115.062	112.56	0.00156083	0.00468253	0.0140476	0.0421426	0.126428	0.379284	1.13785	3.41355	10.2407	30.722	92.1659	Verapamil	DRD2	Calcium Channel Blocker	COC1=C(OC)C=C(CCN(C)CCCC(C#N)(C(C)C)C2=CC(=C(OC)C=C2)OC)C=C1
NCGC00016092-03	WAY-100635	HTR1A	5-HT1A Receptor Antagonist	s-ewing-osteo-TC71-1	activity	2.3	4	-4.42921	4.95492	88.425	125.327	96.992	11	594.681	595.34	0.718977	0.0759851	119.827	123.418	125.98	121.359	126.934	127.814	131.54	114.366	128.85	131.901	96.992	0.000780415	0.00234124	0.00702378	0.0210713	0.0632139	0.189642	0.568925	1.70678	5.12033	15.361	46.0829	WAY-100635	HTR1A	5-HT1A Receptor Antagonist	COC1=C(C=CC=C1)N2CCN(CC2)CCN(C(=O)C3CCCCC3)C4=CC=CC=N4
NCGC00016101-09	Xylometazoline hydrochloride	ADRA2A	alpha2A/B/C-Adrenoceptor Agonists	s-ewing-osteo-TC71-1	activity	2.3	4	-4.72921	3.132	98.1243	122.431	98.8422	11	577.902	580.654	0.439927	0.313503	112.431	112.158	116.874	137.093	114.463	129.59	133.702	122.738	124.094	113.305	98.8422	0.000780415	0.00234124	0.00702378	0.0210713	0.0632139	0.189642	0.568925	1.70678	5.12033	15.361	46.0829	Xylometazoline hydrochloride	ADRA2A	alpha2A/B/C-Adrenoceptor Agonists	CC1=CC(=CC(=C1C\C2=N\CCN2)C)C(C)(C)C
NCGC00016103-06	Lificiguat	HIF1A	Hypoxia Inducible Factor 1-alpha (HIF-1alpha) Inhibitors	s-ewing-osteo-TC71-1	activity	1.1	-2.1	-4.82921	1.98874	46.4194	135.858	51.5388	11	603.492	605.682	0.908063	0.00266621	129.102	137.016	128.367	132.364	131.152	133.432	155.471	143.359	118.298	95.8433	51.5388	0.000780415	0.00234124	0.00702378	0.0210713	0.0632139	0.189642	0.568925	1.70678	5.12033	15.361	46.0829	Lificiguat	HIF1A	Hypoxia Inducible Factor 1-alpha (HIF-1alpha) Inhibitors	OCC1=CC=C(O1)C2=N[N](CC3=CC=CC=C3)C4=C2C=CC=C4
NCGC00016210-06	WIN-55212-2	CNR1	Cannabinoid Receptor Agonist	s-ewing-osteo-TC71-1	activity	4	-2.1	-4.57921	4.09497	10.9033	125.744	21.4532	11	570.354	570.443	0.966669	6.82915e-05	129.105	133.484	127.53	123.558	130.494	124.767	114.831	131.677	116.702	115.678	21.4532	0.000780415	0.00234124	0.00702378	0.0210713	0.0632139	0.189642	0.568925	1.70678	5.12033	15.361	46.0829	WIN-55212-2	CNR1	Cannabinoid Receptor Agonist	CC1=C(C(=O)C2=C3C=CC=CC3=CC=C2)C4=C5N1[C@H](CN6CCOCC6)COC5=CC=C4
NCGC00016229-13	Propylthiouracil	TPO	thyroperoxidase inhibitor	s-ewing-osteo-TC71-1	activity	2.3	4	-4.42921	4.95492	87.6328	117.396	94.5099	11	558.05	560.562	0.637341	0.137751	108.896	113.979	116.667	119.419	110.902	119.972	124.445	120.203	115.188	125.388	94.5099	0.000780415	0.00234124	0.00702378	0.0210713	0.0632139	0.189642	0.568925	1.70678	5.12033	15.361	46.0829	Propylthiouracil	TPO	thyroperoxidase inhibitor	CCC\C1=C\C(=O)NC(=S)N1
NCGC00016241-11	Furosemide	NA	Loop Diuretics	s-ewing-osteo-TC71-1	activity	5	4	NA	NA	NA	NA	110.128	11	NA	536.062	NA	NA	110.789	113.236	118.09	121.23	122.295	66.2296	122.102	116.668	108.51	116.538	110.128	0.000780415	0.00234124	0.00702378	0.0210713	0.0632139	0.189642	0.568925	1.70678	5.12033	15.361	46.0829	Furosemide	NA	Loop Diuretics	N[S+]([O-])(=O)C1=C(Cl)C=C(NCC2=CC=CO2)C(=C1)C(O)=O
NCGC00016244-14	Isoniazid	NA	Cell Wall Biosynthesis Inhibitors	s-ewing-osteo-TC71-1	activity	1.3	1.4	-8.97921	4.95492	136.832	115.332	126.235	11	653.347	655.772	0.420983	0.357207	119.332	139.961	130.171	129.948	144.008	134.822	139.59	128.02	135.463	147.869	126.235	0.000780415	0.00234124	0.00702378	0.0210713	0.0632139	0.189642	0.568925	1.70678	5.12033	15.361	46.0829	Isoniazid	NA	Cell Wall Biosynthesis Inhibitors	NNC(=O)C1=CC=NC=C1
NCGC00016245-01	Scopolamine	NA	Muscarinic Antagonists	s-ewing-osteo-TC71-1	activity	1.3	4	-6.65417	0.6	111.3	103.938	112.211	11	540.795	541.702	0.366841	0.38052	102.3	107.958	106.801	100.331	108.23	102.375	113.473	109.478	106.408	110.822	112.211	0.000460461	0.00138134	0.00414401	0.0124321	0.0372962	0.111889	0.335666	1.007	3.02099	9.06298	27.1889	Scopolamine	NA	Muscarinic Antagonists	CN1[C@H]2CC(C[C@@H]1[C@@H]3O[C@H]23)OC(=O)[C@@H](CO)C4=CC=CC=C4
NCGC00016246-12	Chlorhexidine	MMP1	MMP Inhibitor	s-ewing-osteo-TC71-1	activity	4	-1.1	-5.37921	3.98997	5.69097	117.74	1.29332	11	443.551	446.452	0.981189	7.6676e-06	111.235	114.719	111.875	118.282	131.406	113.282	119.479	121.296	35.3925	13.6286	1.29332	0.000780415	0.00234124	0.00702378	0.0210713	0.0632139	0.189642	0.568925	1.70678	5.12033	15.361	46.0829	Chlorhexidine	MMP1	MMP Inhibitor	ClC1=CC=C(NC(=N)NC(=N)NCCCCCCNC(=N)NC(=N)NC2=CC=C(Cl)C=C2)C=C1
NCGC00016256-16	Pyrimethamine	DHFR	Dihydrofolate Reductase (DHFR) Inhibitors	s-ewing-osteo-TC71-1	activity	4	-1.1	-5.87921	3.132	32.4642	120.388	29.2014	11	439.411	441.262	0.974501	2.46993e-05	113.187	106.021	123.103	123.957	132.073	119.54	117.774	61.3961	34.2097	33.4071	29.2014	0.000780415	0.00234124	0.00702378	0.0210713	0.0632139	0.189642	0.568925	1.70678	5.12033	15.361	46.0829	Pyrimethamine	DHFR	Dihydrofolate Reductase (DHFR) Inhibitors	CCC1=C(C(=NC(=N1)N)N)C2=CC=C(Cl)C=C2
NCGC00016258-07	Menadione	CDC25	Cell Division Cycle CDC25 Phosphatase Inhibitor	s-ewing-osteo-TC71-1	activity	4	-2.1	-4.57921	4.09497	13.6314	125.008	24.1737	11	567.844	568.135	0.994323	6.98e-08	125.542	125.9	125.211	130.98	125.426	123.905	123.754	122.172	124.928	111.825	24.1737	0.000780415	0.00234124	0.00702378	0.0210713	0.0632139	0.189642	0.568925	1.70678	5.12033	15.361	46.0829	Menadione	CDC25	Cell Division Cycle CDC25 Phosphatase Inhibitor	C\C1=C\C(=O)C2=C(C=CC=C2)C1=O
NCGC00016268-09	Niacin	NA	Vitamin	s-ewing-osteo-TC71-1	activity	1.3	4	-5.07921	1.34431	105.145	131.047	106.628	11	608.9	610.663	0.721717	0.0741615	126.547	126.741	135.977	128.759	123.7	141.554	135.606	127.689	120.255	115.104	106.628	0.000780415	0.00234124	0.00702378	0.0210713	0.0632139	0.189642	0.568925	1.70678	5.12033	15.361	46.0829	Niacin	NA	Vitamin	OC(=O)C1=CC=CN=C1
NCGC00016270-10	Levodopa	NA	Dopamine Precursor	s-ewing-osteo-TC71-1	activity	1.3	1.4	-6.42921	0.5	128.667	108.167	130.202	11	564.24	564.147	0.876025	0.00722165	108.167	110.221	113.163	110.138	114.251	116.174	118.122	126.626	123.392	121.457	130.202	0.000780415	0.00234124	0.00702378	0.0210713	0.0632139	0.189642	0.568925	1.70678	5.12033	15.361	46.0829	Levodopa	NA	Dopamine Precursor	N[C@@H](CC1=CC(=C(O)C=C1)O)C(O)=O
NCGC00016285-08	Sulfanilamide	CA1	Carbonic Anhydrase Type I/II/IX Inhibitor	s-ewing-osteo-TC71-1	activity	2.3	-3	-4.57921	4.09497	85.6362	123.775	89.2369	11	583.632	584.253	0.898476	0.00373453	123.519	118.419	126.939	122.846	131.68	126.443	121.442	122.684	121.179	119.901	89.2369	0.000780415	0.00234124	0.00702378	0.0210713	0.0632139	0.189642	0.568925	1.70678	5.12033	15.361	46.0829	Sulfanilamide	CA1	Carbonic Anhydrase Type I/II/IX Inhibitor	NC1=CC=C(C=C1)[S+](N)([O-])=O
NCGC00016305-10	Silver sulfadiazine	NA	Antibiotic	s-ewing-osteo-TC71-1	activity	2.3	4	-4.77921	0.4	144.533	115.033	132.95	11	582.469	582.837	0.538518	0.224244	112.533	112.628	117.375	124.578	117.249	115.865	123.231	127.057	113.726	137.246	132.95	0.000780415	0.00234124	0.00702378	0.0210713	0.0632139	0.189642	0.568925	1.70678	5.12033	15.361	46.0829	Silver sulfadiazine	NA	Antibiotic	NC1=CC=C(C=C1)[S+]([O-])(=O)NC2=NC=CC=N2
NCGC00016306-07	D-Cycloserine	GRIN2A	NMDA partial agonist	s-ewing-osteo-TC71-1	activity	1.3	4	-6.87921	1.96734	122.875	114.83	111.459	11	572.691	572.789	0.685055	0.124615	114.375	115.856	114.692	114.338	117.866	118.806	124.71	127.36	117.794	121.899	111.459	0.000780415	0.00234124	0.00702378	0.0210713	0.0632139	0.189642	0.568925	1.70678	5.12033	15.361	46.0829	D-Cycloserine	GRIN2A	NMDA partial agonist	N[C@@H]1CONC1=O
NCGC00016311-16	Phentolamine mesilate	ADRA1A	alpha-Adrenoceptor Antagonists	s-ewing-osteo-TC71-1	activity	1.1	-2.2	-4.82921	1.1	78.4556	125.678	87.5713	11	574.423	574.876	0.95554	0.000200611	126.478	128.031	123.783	120.767	130.569	124.779	125.765	119.998	113.66	104.003	87.5713	0.000780415	0.00234124	0.00702378	0.0210713	0.0632139	0.189642	0.568925	1.70678	5.12033	15.361	46.0829	Phentolamine mesilate	ADRA1A	alpha-Adrenoceptor Antagonists	CC1=CC=C(C=C1)N(C\C2=N\CCN2)C3=CC=CC(=C3)O
NCGC00016332-03	RIBOFLAVIN	NA	Vitamin	s-ewing-osteo-TC71-1	activity	4	-2.1	-4.57921	4.09497	-0.15185	140.503	12.5222	11	633.639	634.174	0.991133	4.061e-07	141.849	136.006	143.557	138.182	143.903	141.011	147.124	139.431	134.217	127.622	12.5222	0.000780415	0.00234124	0.00702378	0.0210713	0.0632139	0.189642	0.568925	1.70678	5.12033	15.361	46.0829	RIBOFLAVIN	NA	Vitamin	CC1=CC/2=C(C=C1C)N(C[C@@H](O)[C@@H](O)[C@@H](O)CO)C/3=N/C(=O)NC(=O)C3=N2
NCGC00016345-09	4-methylumbelliferone	NA	hyaluronic acid (HA) synthesis	s-ewing-osteo-TC71-1	activity	2.3	-3	-4.62921	1.4641	93.9808	129.587	98.7219	11	607.737	607.306	0.793333	0.033712	132.587	126.551	126.33	134.191	138.696	126.081	128.467	123.057	125.592	120.904	98.7219	0.000780415	0.00234124	0.00702378	0.0210713	0.0632139	0.189642	0.568925	1.70678	5.12033	15.361	46.0829	4-methylumbelliferone	NA	hyaluronic acid (HA) synthesis	C\C1=C\C(=O)OC2=C1C=CC(=C2)O
NCGC00016360-05	Monobenzone	NA	topical medical depigmentation treatment	s-ewing-osteo-TC71-1	activity	1.1	-2.2	-5.02921	1.21	56.1536	134.505	65.4568	11	585.552	585.63	0.977998	1.40375e-05	133.592	141.323	128.691	133.069	130.087	136.712	134.866	126.675	106.173	85.4424	65.4568	0.000780415	0.00234124	0.00702378	0.0210713	0.0632139	0.189642	0.568925	1.70678	5.12033	15.361	46.0829	Monobenzone	NA	topical medical depigmentation treatment	OC1=CC=C(OCC2=CC=CC=C2)C=C1
NCGC00016361-13	Acetaminophen	PTGS1	Cyclooxygenase-3 Inhibitor	s-ewing-osteo-TC71-1	activity	2.3	4	-4.72921	4.95492	106.777	131.495	107.73	11	622.075	622.027	0.645844	0.130748	132.495	132.074	126.794	129.201	141.696	130.907	133.258	120.294	136.14	125.23	107.73	0.000780415	0.00234124	0.00702378	0.0210713	0.0632139	0.189642	0.568925	1.70678	5.12033	15.361	46.0829	Acetaminophen	PTGS1	Cyclooxygenase-3 Inhibitor	CC(=O)NC1=CC=C(O)C=C1
NCGC00016364-03	Chlorphenamine maleate	HRH1	Histamine H1 Receptor Antagonists; SNRI	s-ewing-osteo-TC71-1	activity	2.3	4	-4.42921	4.95492	97.0557	118.954	102.705	11	567.187	568.849	0.538691	0.22443	113.454	112.833	116.509	120.137	125.904	121.516	122.63	124.35	113.13	119.538	102.705	0.000780415	0.00234124	0.00702378	0.0210713	0.0632139	0.189642	0.568925	1.70678	5.12033	15.361	46.0829	Chlorphenamine maleate	HRH1	Histamine H1 Receptor Antagonists; SNRI	CN(C)CC[C@H](C1=CC=C(Cl)C=C1)C2=CC=CC=N2
NCGC00016371-05	Diclofenamide	CA1	Carbonic Anhydrase Type Inhibitor	s-ewing-osteo-TC71-1	activity	2.3	4	-4.42921	4.95492	104.989	123.111	109.426	11	587.957	588.206	0.379186	0.368062	119.111	119.937	125.063	130.871	125.643	123.676	124.844	123.805	110.448	126.142	109.426	0.000780415	0.00234124	0.00702378	0.0210713	0.0632139	0.189642	0.568925	1.70678	5.12033	15.361	46.0829	Diclofenamide	CA1	Carbonic Anhydrase Type Inhibitor	N[S+]([O-])(=O)C1=CC(=C(Cl)C(=C1)[S+](N)([O-])=O)Cl
NCGC00016375-10	Sulphadimethoxine	NA	Antibiotic	s-ewing-osteo-TC71-1	activity	1.3	4	-7.37921	1.1	133.246	120.746	131.396	11	618.793	620.754	0.706864	0.0846138	117.246	127.2	121.07	124.613	126.484	134.711	132.633	138.546	130.207	131.498	131.396	0.000780415	0.00234124	0.00702378	0.0210713	0.0632139	0.189642	0.568925	1.70678	5.12033	15.361	46.0829	Sulphadimethoxine	NA	Antibiotic	COC1=NC(=NC(=C1)N[S+]([O-])(=O)C2=CC=C(N)C=C2)OC
NCGC00016384-14	Sulfafurazole	NA	Antibiotic	s-ewing-osteo-TC71-1	activity	1.3	4	-6.47921	4.95492	122.58	111.3	110.885	11	559.567	558.756	0.785549	0.0520211	112.08	108.93	109.159	111.497	116.967	109.506	124.797	121.427	125.687	118.842	110.885	0.000780415	0.00234124	0.00702378	0.0210713	0.0632139	0.189642	0.568925	1.70678	5.12033	15.361	46.0829	Sulfafurazole	NA	Antibiotic	CC1=NOC(=C1C)N[S+]([O-])(=O)C2=CC=C(N)C=C2
NCGC00016388-03	Noscapine	TUBB	Tubulin polymerization inhibitors	s-ewing-osteo-TC71-1	activity	4	-1.1	-6.62921	1.1	26.6849	142.954	25.3913	11	416.388	419.759	0.987158	1.7371e-06	133.433	141.986	142.45	143.963	125.335	83.408	58.4301	46.8984	31.0568	24.9492	25.3913	0.000780415	0.00234124	0.00702378	0.0210713	0.0632139	0.189642	0.568925	1.70678	5.12033	15.361	46.0829	Noscapine	TUBB	Tubulin polymerization inhibitors	COC1=C(OC)C2=C(C=C1)[C@@H](OC2=O)[C@@H]3N(C)CCC4=C3C(=C5OCOC5=C4)OC
NCGC00016407-11	Sulfamethizole	NA	Antibacterial	s-ewing-osteo-TC71-1	activity	1.1	-2.2	-4.97921	1.24751	63.1014	131.949	72.5566	11	583.924	584.704	0.96544	7.82991e-05	130.229	127.758	140.358	137.154	129.522	129.38	127.442	123.946	115.419	87.7231	72.5566	0.000780415	0.00234124	0.00702378	0.0210713	0.0632139	0.189642	0.568925	1.70678	5.12033	15.361	46.0829	Sulfamethizole	NA	Antibacterial	CC1=NN=C(N[S+]([O-])(=O)C2=CC=C(N)C=C2)S1
NCGC00016408-10	Sulfapyridine	NA	Antibiotic	s-ewing-osteo-TC71-1	activity	1.3	4	-8.67921	2.72022	134.223	113.223	140.882	11	635.842	634.692	0.725179	0.0720248	114.723	124.635	134.127	139.941	128.119	133.945	135.222	128.752	132.446	134.801	140.882	0.000780415	0.00234124	0.00702378	0.0210713	0.0632139	0.189642	0.568925	1.70678	5.12033	15.361	46.0829	Sulfapyridine	NA	Antibiotic	NC1=CC=C(C=C1)[S+]([O-])(=O)NC2=CC=CC=N2
NCGC00016410-18	Thiabendazole	NA	antiparasitic agent	s-ewing-osteo-TC71-1	activity	1.3	4	-7.92921	4.95492	124.658	114.658	114.058	11	587.35	585.752	0.642054	0.160421	113.658	117.238	113.738	126.861	122.449	126.848	124.664	119.85	130.321	119.982	114.058	0.000780415	0.00234124	0.00702378	0.0210713	0.0632139	0.189642	0.568925	1.70678	5.12033	15.361	46.0829	Thiabendazole	NA	antiparasitic agent	[NH]1C2=C(C=CC=C2)N=C1C3=CSC=N3
NCGC00016418-14	Methoxsalen	CYP1A2	Cytochrome P450 CYP1A2 Inhibitor	s-ewing-osteo-TC71-1	activity	1.3	-1.4	-5.47921	4.95492	120.823	141.497	111.431	11	655.413	658.934	0.629233	0.144298	137.997	143.629	140.046	140.471	152.25	142.06	130.158	146.732	120.628	132.1	111.431	0.000780415	0.00234124	0.00702378	0.0210713	0.0632139	0.189642	0.568925	1.70678	5.12033	15.361	46.0829	Methoxsalen	CYP1A2	Cytochrome P450 CYP1A2 Inhibitor	COC1=C2OC(=O)\C=C/C2=CC3=C1OC=C3
NCGC00016423-14	(-)-Gossypol	BCL2L1	Bcl-xL inhibitor	s-ewing-osteo-TC71-1	activity	4	-2.1	-4.87921	2.30312	-5.15119	141.01	4.01863	11	591.252	592.922	0.99696	5.8e-09	138.869	138.941	139.196	138.841	146.762	142.648	141.342	142.421	127.059	53.7539	4.01863	0.000780415	0.00234124	0.00702378	0.0210713	0.0632139	0.189642	0.568925	1.70678	5.12033	15.361	46.0829	(-)-Gossypol	BCL2L1	Bcl-xL inhibitor	CC(C)C1=C(O)C(=C(C=O)C2=C1C=C(C)C(=C2O)C3=C(O)C4=C(C=O)C(=C(O)C(=C4C=C3C)C(C)C)O)O
NCGC00016438-05	Procarbazine hydrochloride	NA	DNA Alkylating Agent	s-ewing-osteo-TC71-1	activity	1.3	4	-7.42921	0.3	145.016	119.516	149.266	11	648.162	646.613	0.645795	0.130956	123.516	124.885	131.474	134.928	134.889	129.962	138.662	142.433	136.669	133.862	149.266	0.000780415	0.00234124	0.00702378	0.0210713	0.0632139	0.189642	0.568925	1.70678	5.12033	15.361	46.0829	Procarbazine hydrochloride	NA	DNA Alkylating Agent	CNNCC1=CC=C(C=C1)C(=O)NC(C)C
NCGC00016446-12	Metronidazole	NA	Antibiotic	s-ewing-osteo-TC71-1	activity	1.3	4	-8.42921	0.7	121.201	106.701	124.127	11	570.064	569.83	0.768092	0.0467508	108.701	112.952	119.246	115.523	119.03	119.159	121.208	122.706	121.066	117.787	124.127	0.000780415	0.00234124	0.00702378	0.0210713	0.0632139	0.189642	0.568925	1.70678	5.12033	15.361	46.0829	Metronidazole	NA	Antibiotic	CC1=NC=C([N]1CCO)[N+]([O-])=O
NCGC00016447-02	Proscillaridin	NA	Steroid	s-ewing-osteo-TC71-1	activity	4	-1.1	-7.72921	1.78849	7.36095	126.124	4.08381	11	199.211	200.698	0.996622	8.9e-09	121.124	129.078	108.529	56.9752	22.6595	9.21493	8.17786	7.99361	7.76802	7.33879	4.08381	0.000780415	0.00234124	0.00702378	0.0210713	0.0632139	0.189642	0.568925	1.70678	5.12033	15.361	46.0829	Proscillaridin	NA	Steroid	C[C@@H]1O[C@@H](O[C@H]\2CC[C@]\3(C)[C@@H]4CC[C@]5(C)[C@@H](CC[C@@]5(O)[C@H]4CCC3=C2)C/6=C/OC(=O)/C=C6)[C@H](O)[C@H](O)[C@@H]1O
NCGC00016456-12	5	7-Dihydroxyflavone	NA	s-ewing-osteo-TC71-1	activity	2.3	-3	-4.47921	4.95492	69.8984	123.107	78.4113	11	578.995	581.922	0.883793	0.00582883	115.011	121.163	115.896	121.594	127.608	125.625	130.342	125.51	122.031	127.35	78.4113	0.000780415	0.00234124	0.00702378	0.0210713	0.0632139	0.189642	0.568925	1.70678	5.12033	15.361	46.0829	5	7-Dihydroxyflavone	NA	Antiinflammatory Drug	OC1=CC2=C(C(=C1)O)C(=O)\C=C(/O2)C3=CC=CC=C3
NCGC00016457-03	Naringenin	CYP3A4	Cytochrome P450 CYP3A4 Inhibitor	s-ewing-osteo-TC71-1	activity	2.3	4	-4.67921	0.7	110.813	147.855	120.737	11	686.467	686.775	0.641739	0.134035	150.355	148.625	145.205	142.007	153.604	142.372	146.885	147.676	127.365	141.164	120.737	0.000780415	0.00234124	0.00702378	0.0210713	0.0632139	0.189642	0.568925	1.70678	5.12033	15.361	46.0829	Naringenin	CYP3A4	Cytochrome P450 CYP3A4 Inhibitor	OC1=CC=C(C=C1)[C@@H]2CC(=O)C3=C(O2)C=C(O)C=C3O
NCGC00016463-02	Cytisine	CHRNA3	Nicotinic alpha3beta4 Partial Agonists	s-ewing-osteo-TC71-1	activity	1.3	4	-4.87921	4.95492	103.983	131.995	104.818	11	617.6	617.771	0.648989	0.128042	126.495	129.603	115.489	132.526	141.945	136.631	134.587	129.633	139.141	111.793	104.818	0.000780415	0.00234124	0.00702378	0.0210713	0.0632139	0.189642	0.568925	1.70678	5.12033	15.361	46.0829	Cytisine	CHRNA3	Nicotinic alpha3beta4 Partial Agonists	O=C1\C=C/C=C2/[C@H]3CNC[C@H](C3)CN12
NCGC00016467-05	Luteolin	PDE4A	Phosphodiesterase IIII (PDE4) inhibitor	s-ewing-osteo-TC71-1	activity	1.3	4	-6.72921	2.33317	134.123	121.76	99.1462	11	615.278	613.512	0.793785	0.0472625	123.623	117.904	123.649	124.078	120.643	128.686	132.343	134.296	138.989	129.243	99.1462	0.000780415	0.00234124	0.00702378	0.0210713	0.0632139	0.189642	0.568925	1.70678	5.12033	15.361	46.0829	Luteolin	PDE4A	Phosphodiesterase IIII (PDE4) inhibitor	OC1=CC(O)=C2C(=O)C=C(OC2=C1)C3=CC(O)=C(O)C=C3
NCGC00016480-09	Kaempferol	NA	flavanoid	s-ewing-osteo-TC71-1	activity	4	-2.1	-4.72921	4.09497	18.5772	128.992	26.3751	11	573.846	575.607	0.955517	0.000200613	123.848	122.213	120.569	126.498	125.847	132.092	140.683	139.237	125.124	97.0822	26.3751	0.000780415	0.00234124	0.00702378	0.0210713	0.0632139	0.189642	0.568925	1.70678	5.12033	15.361	46.0829	Kaempferol	NA	flavanoid	OC1=CC=C(C=C1)\C2=C(O)\C(=O)C3=C(O2)C=C(O)C=C3O
NCGC00016488-03	Kinetin	NA	plant hormone	s-ewing-osteo-TC71-1	activity	1.3	4	-6.97921	4.95492	131.453	140.257	124.087	11	650.645	652.767	0.418378	0.333469	139.757	136.451	139.436	143.294	142.166	129.206	130.346	139.501	125.93	140.668	124.087	0.000780415	0.00234124	0.00702378	0.0210713	0.0632139	0.189642	0.568925	1.70678	5.12033	15.361	46.0829	Kinetin	NA	plant hormone	C(NC1=C2NC=NC2=NC=N1)C3=CC=CO3
NCGC00016497-08	Ethionamide	NA	Cell Wall Biosynthesis Inhibitors	s-ewing-osteo-TC71-1	activity	2.1	-2.1	-4.67921	4.09497	31.9585	133.027	39.8429	11	602.025	603.536	0.974988	2.29488e-05	131.522	128.149	127.993	128.226	134.162	137.547	131.915	140.213	138.846	109.26	39.8429	0.000780415	0.00234124	0.00702378	0.0210713	0.0632139	0.189642	0.568925	1.70678	5.12033	15.361	46.0829	Ethionamide	NA	Cell Wall Biosynthesis Inhibitors	CCC1=NC=CC(=C1)C(N)=S
NCGC00016526-11	Berberine	PTP4A1	Protein Tyrosine Phosphatase (PTP) Inhibitors	s-ewing-osteo-TC71-1	activity	1.1	-2.1	-5.22921	0.8	28.6142	136.019	41.3563	11	543.965	545.75	0.986804	1.932e-06	132.371	132.311	138.331	138.406	129.072	135.167	122.926	106.348	83.717	67.6249	41.3563	0.000780415	0.00234124	0.00702378	0.0210713	0.0632139	0.189642	0.568925	1.70678	5.12033	15.361	46.0829	Berberine	PTP4A1	Protein Tyrosine Phosphatase (PTP) Inhibitors	COC1=C(OC)C2=C(C=C1)C=C3C4=CC5=C(OCO5)C=C4CC[N+]3=C2
NCGC00016530-06	Sulfameter	NA	Antibiotic	s-ewing-osteo-TC71-1	activity	1.3	4	-7.92921	4.95492	133.521	125.309	137.567	11	632.068	631.422	0.58327	0.185158	125.521	127.049	123.678	137.339	128.842	128.668	135.585	134.889	131.229	134.361	137.567	0.000780415	0.00234124	0.00702378	0.0210713	0.0632139	0.189642	0.568925	1.70678	5.12033	15.361	46.0829	Sulfameter	NA	Antibiotic	COC1=CN=C(N[S+]([O-])(=O)C2=CC=C(N)C=C2)N=C1
NCGC00016533-14	Sulfamethoxazole	NA	Antibiotic	s-ewing-osteo-TC71-1	activity	1.3	4	-6.17921	0.5	149.947	121.411	121.343	11	639.075	638.384	0.840309	0.793158	120.447	128.56	121.735	120	131.667	133.07	135.839	136.529	76.4231	145.644	121.343	0.000780415	0.00234124	0.00702378	0.0210713	0.0632139	0.189642	0.568925	1.70678	5.12033	15.361	46.0829	Sulfamethoxazole	NA	Antibiotic	CC1=CC(=NO1)N[S+]([O-])(=O)C2=CC=C(N)C=C2
NCGC00016543-08	Phenformin hydrochloride	NA	antidiabetic drug	s-ewing-osteo-TC71-1	activity	2.3	-2.2	-4.72921	2.33317	77.5818	130.781	77.2043	11	604.464	604.498	0.863389	0.00978755	124.281	142.489	123.363	135.093	137.61	130.869	124.974	128.472	123.676	113.947	77.2043	0.000780415	0.00234124	0.00702378	0.0210713	0.0632139	0.189642	0.568925	1.70678	5.12033	15.361	46.0829	Phenformin hydrochloride	NA	antidiabetic drug	NC(=N)NC(=N)NCCC1=CC=CC=C1
NCGC00016552-02	7-Aminocephalosporanic acid	NA	Cephalosporin intermediate	s-ewing-osteo-TC71-1	activity	1.3	4	-8.72921	1.96734	129.028	110.528	127.065	11	612.321	612.016	0.700332	0.0893064	113.528	121.356	128.952	127.384	122.687	127.046	130.994	135.166	131.728	127.681	127.065	0.000780415	0.00234124	0.00702378	0.0210713	0.0632139	0.189642	0.568925	1.70678	5.12033	15.361	46.0829	7-Aminocephalosporanic acid	NA	Cephalosporin intermediate	CC(=O)OC\C1=C(\[N@]2[C@@H](SC1)[C@H](N)C2=O)C(O)=O
NCGC00016564-07	Metformin HCl	PRKAA1	AMP-Activated Protein Kinase (AMPK) Activator	s-ewing-osteo-TC71-1	activity	2.3	4	-4.42921	4.95492	119.025	139.588	124.286	11	666.646	666.987	0.668724	0.113015	140.588	134.91	140.847	141.627	143.107	143.872	135.788	134.269	141.632	140.22	124.286	0.000780415	0.00234124	0.00702378	0.0210713	0.0632139	0.189642	0.568925	1.70678	5.12033	15.361	46.0829	Metformin HCl	PRKAA1	AMP-Activated Protein Kinase (AMPK) Activator	CN(C)C(=N)NC(N)=N
NCGC00016569-08	Tranexamic acid	SERPINE1	Tissue-Type Plasminogen Activator Inhibitor (tPA) Inhibitor	s-ewing-osteo-TC71-1	activity	1.3	-2.2	-5.02921	0.8	101.238	142.172	108.643	11	648.177	646.729	0.859202	0.0107708	145.672	141.812	141.407	148.484	134.384	140.05	130.147	140.296	127.292	116.384	108.643	0.000780415	0.00234124	0.00702378	0.0210713	0.0632139	0.189642	0.568925	1.70678	5.12033	15.361	46.0829	Tranexamic acid	SERPINE1	Tissue-Type Plasminogen Activator Inhibitor (tPA) Inhibitor	NCC1CCC(CC1)C(O)=O
NCGC00016599-05	Flucytosine	NA	Pyrimidine Antagonists	s-ewing-osteo-TC71-1	activity	2.3	-2.2	-4.72921	1.88512	98.1788	132.096	101.237	11	618.946	620.22	0.799393	0.0310007	126.585	136.336	132.372	141.457	129.11	135.578	127.028	128.579	126.294	121.736	101.237	0.000780415	0.00234124	0.00702378	0.0210713	0.0632139	0.189642	0.568925	1.70678	5.12033	15.361	46.0829	Flucytosine	NA	Pyrimidine Antagonists	NC/1=N/C(=O)N/C=C1F
NCGC00016610-08	Tolnaftate	NA	Fungal Squalene Monooxygenase Inhibitor	s-ewing-osteo-TC71-1	activity	2.3	4	-4.72921	3.132	101.795	125.167	101.523	11	591.456	592.744	0.717488	0.0770507	120.167	118.776	126.203	129.149	121.738	125.777	135.36	123.044	126.864	117.037	101.523	0.000780415	0.00234124	0.00702378	0.0210713	0.0632139	0.189642	0.568925	1.70678	5.12033	15.361	46.0829	Tolnaftate	NA	Fungal Squalene Monooxygenase Inhibitor	CN(C(=S)OC1=CC=C2C=CC=CC2=C1)C3=CC(=CC=C3)C
NCGC00016611-09	Bufexamac	NA	non-steroidal antiinflammatory	s-ewing-osteo-TC71-1	activity	4	-1.1	-5.12921	1.62662	-8.84858	141.322	3.10057	11	552.7	551.676	0.994261	7.29e-08	142.044	136.069	139.489	147.462	141.287	135.018	141.563	128.672	90.9335	22.9617	3.10057	0.000780415	0.00234124	0.00702378	0.0210713	0.0632139	0.189642	0.568925	1.70678	5.12033	15.361	46.0829	Bufexamac	NA	non-steroidal antiinflammatory	CCCCOC1=CC=C(CC(=O)NO)C=C1
NCGC00016612-04	Sulfadoxine	NA	Dihydropteroate Synthase (DHPS) Inhibitors	s-ewing-osteo-TC71-1	activity	1.3	4	-6.22921	3.132	131.481	125.695	121.214	11	615.319	616.867	0.381521	0.392969	125.481	131.98	122.933	127.842	122.326	124.779	128.335	133.194	126.584	134.781	121.214	0.000780415	0.00234124	0.00702378	0.0210713	0.0632139	0.189642	0.568925	1.70678	5.12033	15.361	46.0829	Sulfadoxine	NA	Dihydropteroate Synthase (DHPS) Inhibitors	COC1=NC=NC(=C1OC)N[S+]([O-])(=O)C2=CC=C(N)C=C2
NCGC00016623-06	Moroxydine	NA	antiinfluenza drug	s-ewing-osteo-TC71-1	activity	4	-3	-4.42921	4.95492	-26.1549	119.109	9.50057	11	542.113	541.864	0.927387	0.00117801	120.924	125.103	130.474	127.435	122.216	121.094	117.674	107.717	97.6943	120.37	9.50057	0.000780415	0.00234124	0.00702378	0.0210713	0.0632139	0.189642	0.568925	1.70678	5.12033	15.361	46.0829	Moroxydine	NA	antiinfluenza drug	NC(=N)NC(=N)N1CCOCC1
NCGC00016641-01	Streptomycin sulfate	NA	30S Ribosomal Protein Inhibitors	s-ewing-osteo-TC71-1	activity	1.3	-2.4	-5.67435	0.5	112.056	141.271	121.008	11	711.271	711.608	0.785315	0.037523	139.771	140.307	141.874	146.631	134.184	131.068	139.813	131.667	130.181	120.009	121.008	0.000226313	0.000678986	0.00203691	0.00611069	0.018332	0.0549961	0.164988	0.494965	1.4849	4.45469	13.3641	Streptomycin sulfate	NA	30S Ribosomal Protein Inhibitors	CN[C@@H]1[C@H](O)[C@H](O)[C@H](CO)O[C@H]1O[C@@H]2[C@@H](O[C@H](C)[C@@]2(O)C=O)O[C@@H]3[C@@H](O)[C@@H](O)[C@@H](NC(N)=N)[C@@H](O)[C@H]3NC(N)=N
NCGC00016643-10	Trioxsalen	NA	phototherapy treatment of skin disorders	s-ewing-osteo-TC71-1	activity	4	-2.1	-4.92921	3.57225	26.7556	128.353	28.57	11	551.949	554.241	0.981842	6.6878e-06	119.288	131.313	126.755	131.604	121.74	129.585	133.809	135.218	121.495	54.0651	28.57	0.000780415	0.00234124	0.00702378	0.0210713	0.0632139	0.189642	0.568925	1.70678	5.12033	15.361	46.0829	Trioxsalen	NA	phototherapy treatment of skin disorders	CC1=CC2=C(O1)C(=C3OC(=O)\C=C(C)/C3=C2)C
NCGC00016645-03	Methacycline hydrochloride	NA	Tetracycline Antibiotic	s-ewing-osteo-TC71-1	activity	2.1	-2.2	-4.67921	1.62662	65.4845	137.983	74.3844	11	630.773	631.048	0.913381	0.00217591	137.955	141.824	142.75	139.06	141.787	132.706	143.827	128.649	122.661	117.659	74.3844	0.000780415	0.00234124	0.00702378	0.0210713	0.0632139	0.189642	0.568925	1.70678	5.12033	15.361	46.0829	Methacycline hydrochloride	NA	Tetracycline Antibiotic	CN(C)[C@H]\1[C@@H]2[C@@H](O)[C@@H]\3C(=C)C4=C(C(=CC=C4)O)C(=O)C3=C(\O)[C@@]2(O)C(=O)\C(=C1O)C(N)=O
NCGC00016656-01	Vidarabine	NA	Adenosine Receptor Agonist; Anti-Herpes Simplex Virus Drug	s-ewing-osteo-TC71-1	activity	1.3	4	-5.12915	4.95492	106.735	122.049	107.121	11	588.96	584.086	0.592312	0.176392	124.049	117.109	118.13	111.318	120.007	126.815	126.017	122.836	122.903	107.461	107.121	0.0005853	0.00175594	0.00526783	0.0158035	0.0474105	0.142231	0.426694	1.28008	3.84025	11.5207	34.5622	Vidarabine	NA	Adenosine Receptor Agonist; Anti-Herpes Simplex Virus Drug	NC1=NC=NC2=C1N=C[N]2[C@@H]3O[C@@H](CO)[C@H](O)[C@@H]3O
NCGC00016672-04	Chloropyramine hydrochloride	HRH1	Histamine H1 Receptor Antagonists	s-ewing-osteo-TC71-1	activity	2.1	-2.1	-4.67921	4.09497	30.7526	118.88	37.5507	11	538.813	540.304	0.905977	0.00287738	116.607	110.979	124.589	129.822	126.357	124.913	122.411	109.081	104.633	99.7706	37.5507	0.000780415	0.00234124	0.00702378	0.0210713	0.0632139	0.189642	0.568925	1.70678	5.12033	15.361	46.0829	Chloropyramine hydrochloride	HRH1	Histamine H1 Receptor Antagonists	Cl.Clc1ccc(cc1)CN(CCN(C)C)c2ccccn2
NCGC00016706-05	Parbendazole	TUBB	Tubulin depolymerization inhibitor	s-ewing-osteo-TC71-1	activity	1.1	-1.1	-7.72921	1.1341	31.5917	138.762	30.5562	11	300.816	300.351	0.99752	2.6e-09	134.102	132.267	113.254	76.683	55.0446	37.4038	34.5221	32.9895	30.734	32.0086	30.5562	0.000780415	0.00234124	0.00702378	0.0210713	0.0632139	0.189642	0.568925	1.70678	5.12033	15.361	46.0829	Parbendazole	TUBB	Tubulin depolymerization inhibitor	CCCCC1=CC2=C([NH]C(=N2)NC(=O)OC)C=C1
NCGC00016710-04	Clemastine fumarate	HRH1	Histamine H1 Receptor Antagonists	s-ewing-osteo-TC71-1	activity	2.1	-2.2	-4.67921	4.09497	36.8952	118.372	42.5116	11	538.828	541.267	0.939377	0.000620334	110.619	108.29	119.433	119.221	125.95	127.461	122.087	116.431	114.851	100.997	42.5116	0.000780415	0.00234124	0.00702378	0.0210713	0.0632139	0.189642	0.568925	1.70678	5.12033	15.361	46.0829	Clemastine fumarate	HRH1	Histamine H1 Receptor Antagonists	CN1CCC[C@@H]1CCO[C@](C)(C2=CC=CC=C2)C3=CC=C(Cl)C=C3
NCGC00016740-19	Prazosin hydrochloride	ADRA1A	alpha1-Adrenoceptor Antagonists	s-ewing-osteo-TC71-1	activity	2.1	-3	-4.57921	4.09497	30.1663	112.736	37.8609	11	517.397	519.125	0.974457	2.48764e-05	107.219	105.36	113.7	115.573	117.521	115.023	112.883	113.098	115.811	103.717	37.8609	0.000780415	0.00234124	0.00702378	0.0210713	0.0632139	0.189642	0.568925	1.70678	5.12033	15.361	46.0829	Prazosin hydrochloride	ADRA1A	alpha1-Adrenoceptor Antagonists	COC1=CC2=NC(=NC(=C2C=C1OC)N)N3CCN(CC3)C(=O)C4=CC=CO4
NCGC00016752-02	Clindamycin hydrochloride	NA	Antibacterial	s-ewing-osteo-TC71-1	activity	2.3	4	-5.17921	2.40638	146.558	127.171	131.643	11	628.31	627.945	0.786477	0.051514	130.558	122.736	123.465	128.118	132.131	126.355	128.514	128.584	133.451	144.498	131.643	0.000780415	0.00234124	0.00702378	0.0210713	0.0632139	0.189642	0.568925	1.70678	5.12033	15.361	46.0829	Clindamycin hydrochloride	NA	Antibacterial	CCC[C@H]1C[C@@H](N(C)C1)C(=O)N[C@H]([C@H](C)Cl)[C@@H]2O[C@@H](SC)[C@@H](O)[C@@H](O)[C@H]2O
NCGC00016759-03	Naproxen sodium	PTGS2	Cyclooxygenase-1/2 Inhibitor	s-ewing-osteo-TC71-1	activity	1.3	4	-5.62921	4.44947	128.852	137.389	128.772	11	649.218	649.75	0.341826	0.40007	131.889	129.837	129.529	144.82	140.483	145.777	138.034	135.658	129.258	128.525	128.772	0.000780415	0.00234124	0.00702378	0.0210713	0.0632139	0.189642	0.568925	1.70678	5.12033	15.361	46.0829	Naproxen sodium	PTGS2	Cyclooxygenase-1/2 Inhibitor	COC1=CC2=CC=C(C=C2C=C1)[C@H](C)C(O)=O
NCGC00016777-07	Probucol	NA	ABCA Modulator?	s-ewing-osteo-TC71-1	activity	2.3	-2.2	-4.67921	1.88512	59.83	121.848	68.063	11	558.976	557.746	0.895122	0.00415523	126.87	114.285	120.346	121.825	114.539	127.388	128.29	127.518	110.136	102.133	68.063	0.000780415	0.00234124	0.00702378	0.0210713	0.0632139	0.189642	0.568925	1.70678	5.12033	15.361	46.0829	Probucol	NA	ABCA Modulator?	CC(C)(C)C1=CC(=CC(=C1O)C(C)(C)C)SC(C)(C)SC2=CC(=C(O)C(=C2)C(C)(C)C)C(C)(C)C
NCGC00016786-14	Mycophenolic acid	IMPDH1	Inosine 5'-Monophosphate Dehydrogenase (IMPDH) Inhibitors	s-ewing-osteo-TC71-1	activity	4	-1.1	-5.62921	1.1	11.9885	126.281	21.1234	11	453.476	455.79	0.989209	8.789e-07	127.343	125.981	121.928	122.547	127.091	120.832	114.4	71.2643	48.6888	26.7574	21.1234	0.000780415	0.00234124	0.00702378	0.0210713	0.0632139	0.189642	0.568925	1.70678	5.12033	15.361	46.0829	Mycophenolic acid	IMPDH1	Inosine 5'-Monophosphate Dehydrogenase (IMPDH) Inhibitors	COC1=C(C)C2=C(C(=C1C\C=C(/C)CCC(O)=O)O)C(=O)OC2
NCGC00016794-14	Gemfibrozil	PPARA	PPARalpha agonist	s-ewing-osteo-TC71-1	activity	2.1	-3	-4.42921	4.95492	8.31183	125.467	35.5307	11	578.555	578.802	0.919664	0.00167723	118.57	114.702	116.754	122.527	129.231	126.042	132.634	124.992	124.899	141.641	35.5307	0.000780415	0.00234124	0.00702378	0.0210713	0.0632139	0.189642	0.568925	1.70678	5.12033	15.361	46.0829	Gemfibrozil	PPARA	PPARalpha agonist	CC1=CC(=C(C)C=C1)OCCCC(C)(C)C(O)=O
NCGC00016797-04	Amoxicillin sodium	NA	beta-lactam antibiotic	s-ewing-osteo-TC71-1	activity	2.3	-2.4	-4.77921	1.24751	91.1459	133.438	99.3155	11	617.463	619.204	0.716421	0.0776209	129.438	131.036	128.087	142.218	136.158	138.754	139.206	115.65	133.15	111.781	99.3155	0.000780415	0.00234124	0.00702378	0.0210713	0.0632139	0.189642	0.568925	1.70678	5.12033	15.361	46.0829	Amoxicillin sodium	NA	beta-lactam antibiotic	CC1(C)S[C@H]2[C@H](NC(=O)[C@@H](N)C3=CC=C(O)C=C3)C(=O)[N@]2[C@H]1C(O)=O
NCGC00016806-12	Mebendazole	TUBB	Tubulin depolymerization inhibitor	s-ewing-osteo-TC71-1	activity	4	-1.1	-5.82921	1.75295	10.2489	125.145	5.43509	11	425.859	427.087	0.985912	2.4935e-06	125.78	112.969	132.256	124.897	121.783	132.4	106.512	58.5588	26.2553	13.4899	5.43509	0.000780415	0.00234124	0.00702378	0.0210713	0.0632139	0.189642	0.568925	1.70678	5.12033	15.361	46.0829	Mebendazole	TUBB	Tubulin depolymerization inhibitor	COC(=O)NC1=NC2=C([NH]1)C=CC(=C2)C(=O)C3=CC=CC=C3
NCGC00016831-04	Buflomedil hydrochloride	NA	vasodilator	s-ewing-osteo-TC71-1	activity	1.3	4	-5.37921	1.1	109.661	126.434	109.873	11	589.173	587.404	0.752456	0.0551913	128.434	120.833	123.196	126.153	128.311	129.169	121.584	125.177	113.541	115.865	109.873	0.000780415	0.00234124	0.00702378	0.0210713	0.0632139	0.189642	0.568925	1.70678	5.12033	15.361	46.0829	Buflomedil hydrochloride	NA	vasodilator	COC1=CC(=C(C(=O)CCCN2CCCC2)C(=C1)OC)OC
NCGC00016855-11	Fenbendazole	NA	antiparasitic agent	s-ewing-osteo-TC71-1	activity	4	-1.1	-5.77921	1.98874	25.4868	129.452	20.5288	11	468.509	469.223	0.993535	1.168e-07	128.312	127.5	134.522	126.454	130.747	122.357	122.308	75.7365	37.0517	30.8247	20.5288	0.000780415	0.00234124	0.00702378	0.0210713	0.0632139	0.189642	0.568925	1.70678	5.12033	15.361	46.0829	Fenbendazole	NA	antiparasitic agent	COC(=O)NC1=NC2=C([NH]1)C=CC(=C2)SC3=CC=CC=C3
NCGC00016868-11	Acemetacin	PTGS1	Cyclooxygenase-1/2/3 Inhibitor	s-ewing-osteo-TC71-1	activity	1.3	4	-5.32921	4.95492	101.714	125.124	104.253	11	577.009	576.619	0.755771	0.0530519	121.124	118.287	126.503	123.637	125.093	137.081	117.672	130.273	110.029	99.5327	104.253	0.000780415	0.00234124	0.00702378	0.0210713	0.0632139	0.189642	0.568925	1.70678	5.12033	15.361	46.0829	Acemetacin	PTGS1	Cyclooxygenase-1/2/3 Inhibitor	COC1=CC2=C(C=C1)[N](C(=C2CC(=O)OCC(O)=O)C)C(=O)C3=CC=C(Cl)C=C3
NCGC00016872-09	Ticlopidine hydrochloride	P2RY12	P2Y12 (P2T) Antagonists	s-ewing-osteo-TC71-1	activity	1.1	1.4	-7.07921	1.21	126.028	103.028	111.064	11	559.09	558.792	0.92693	0.00254675	100.028	105.146	106.152	106.823	111.712	121.465	121.055	128.893	128.914	121.327	111.064	0.000780415	0.00234124	0.00702378	0.0210713	0.0632139	0.189642	0.568925	1.70678	5.12033	15.361	46.0829	Ticlopidine hydrochloride	P2RY12	P2Y12 (P2T) Antagonists	ClC1=C(CN2CCC3=C(C2)C=CS3)C=CC=C1
NCGC00016879-07	Torasemide	NA	Loop Diuretics	s-ewing-osteo-TC71-1	activity	1.3	4	-5.77921	3.98997	108.773	123.258	106.944	11	571.012	571.655	0.625844	0.147338	122.258	118.415	126.316	124.609	124.321	121.639	126.057	115.286	98.9368	120.012	106.944	0.000780415	0.00234124	0.00702378	0.0210713	0.0632139	0.189642	0.568925	1.70678	5.12033	15.361	46.0829	Torasemide	NA	Loop Diuretics	CC(C)NC(=O)N[S+]([O-])(=O)C1=C(NC2=CC(=CC=C2)C)C=CN=C1
NCGC00016889-05	Tenoxicam	NA	non-steroidal antiinflammatory	s-ewing-osteo-TC71-1	activity	2.3	-3	-4.67921	1.331	101.66	144.159	107.334	11	672.605	675.742	0.767788	0.046372	135.702	146.749	148.364	150.382	148.802	138.508	149.391	137.744	132.345	134.516	107.334	0.000780415	0.00234124	0.00702378	0.0210713	0.0632139	0.189642	0.568925	1.70678	5.12033	15.361	46.0829	Tenoxicam	NA	non-steroidal antiinflammatory	CN1\C(=C(\O)C2=C(C=CS2)[S+]1([O-])=O)C(=O)NC3=CC=CC=N3
NCGC00016899-04	Rolipram	PDE4A	Phosphodiesterase IIII (PDE4) inhibitor	s-ewing-osteo-TC71-1	activity	4	-1.1	-5.62921	1.331	9.51593	129.754	11.7339	11	463.201	465.73	0.982099	6.3274e-06	122.63	119.757	125.143	141.253	126.953	134.312	116.274	80.114	43.299	20.9649	11.7339	0.000780415	0.00234124	0.00702378	0.0210713	0.0632139	0.189642	0.568925	1.70678	5.12033	15.361	46.0829	Rolipram	PDE4A	Phosphodiesterase IIII (PDE4) inhibitor	COC1=C(OC2CCCC2)C=C(C=C1)[C@@H]3CNC(=O)C3
NCGC00016916-12	Norfloxacin	TOP2B	DNA Topoisomerase IV Inhibitors	s-ewing-osteo-TC71-1	activity	1.3	4	-6.47921	4.95492	141.779	133.129	149.114	11	658.756	656.637	0.352736	0.390551	132.779	132.595	128.904	138.356	134.872	130.61	145.289	148.91	132.482	132.211	149.114	0.000780415	0.00234124	0.00702378	0.0210713	0.0632139	0.189642	0.568925	1.70678	5.12033	15.361	46.0829	Norfloxacin	TOP2B	DNA Topoisomerase IV Inhibitors	CCN1\C=C(\C(O)=O)C(=O)C2=C1C=C(N3CCNCC3)C(=C2)F
NCGC00016925-10	Omeprazole	ABCC3	ABCC3 Expression Enhancer	s-ewing-osteo-TC71-1	activity	2.1	-3	-4.47921	4.50447	44.1407	116.885	57.7344	11	544.529	547.645	0.928292	0.00112797	107.571	114.155	116.879	117.46	123.997	121.553	123.011	118.367	110.614	114.835	57.7344	0.000780415	0.00234124	0.00702378	0.0210713	0.0632139	0.189642	0.568925	1.70678	5.12033	15.361	46.0829	Omeprazole	ABCC3	ABCC3 Expression Enhancer	COC1=CC2=C([NH]C(=N2)[S+]([O-])CC3=C(C)C(=C(C)C=N3)OC)C=C1
NCGC00016927-10	Enoxacin	NA	Quinoline Antibiotic	s-ewing-osteo-TC71-1	activity	1.3	1.4	-8.57921	2.72022	118.752	100.252	119.929	11	560.816	561.561	0.896327	0.00402704	100.752	108.419	117.167	120.891	117.821	117.248	115.731	119.375	123.404	117.675	119.929	0.000780415	0.00234124	0.00702378	0.0210713	0.0632139	0.189642	0.568925	1.70678	5.12033	15.361	46.0829	Enoxacin	NA	Quinoline Antibiotic	CCN1\C=C(\C(O)=O)C(=O)C2=C1N=C(N3CCNCC3)C(=C2)F
NCGC00016936-03	Aztreonam	NA	beta-lactam antibiotic	s-ewing-osteo-TC71-1	activity	2.3	4	-4.62921	4.50447	108.663	125.189	109.251	11	596.396	598.145	0.467368	0.289289	119.689	122.898	126.971	132.016	128.557	121.837	133.451	115.825	126.423	123.092	109.251	0.000780415	0.00234124	0.00702378	0.0210713	0.0632139	0.189642	0.568925	1.70678	5.12033	15.361	46.0829	Aztreonam	NA	beta-lactam antibiotic	C[C@H]1[C@H](NC(=O)\C(=N\OC(C)(C)C(O)=O)C2=CSC(=N2)N)C(=O)N1[S+](O)([O-])=O
NCGC00016959-07	Ciprofloxacin	TOP2B	DNA Topoisomerase IV Inhibitors	s-ewing-osteo-TC71-1	activity	1.3	4	-4.92921	0.2	142.731	115.731	138.356	11	598.047	598.223	0.365984	0.379421	113.231	124.549	124.722	119.595	129.405	122.061	127.104	118.071	122.234	130.01	138.356	0.000780415	0.00234124	0.00702378	0.0210713	0.0632139	0.189642	0.568925	1.70678	5.12033	15.361	46.0829	Ciprofloxacin	TOP2B	DNA Topoisomerase IV Inhibitors	OC(=O)\C1=C\N(C2CC2)C3=CC(=C(F)C=C3C1=O)N4CCNCC4
NCGC00016960-03	Glimepiride	NA	K(ATP) Channel Blockers	s-ewing-osteo-TC71-1	activity	5	4	NA	NA	NA	NA	112.307	11	NA	552.855	NA	NA	114.369	110.072	110.447	118.112	112.611	114.49	125.236	116.987	114.473	114.624	112.307	0.000780415	0.00234124	0.00702378	0.0210713	0.0632139	0.189642	0.568925	1.70678	5.12033	15.361	46.0829	Glimepiride	NA	K(ATP) Channel Blockers	CC=3CN(C(=O)NCCc1ccc(cc1)S(=O)(=O)NC(=O)N[C@@H]2CC[C@@H](C)CC2)C(=O)C=3CC
NCGC00016973-03	Letrozole	CYP19A1	Aromatase Inhibitor	s-ewing-osteo-TC71-1	activity	2.3	-3	-4.62921	4.09497	80.6951	125.7	83.2148	11	589.343	589.649	0.797412	0.0318349	124.469	128.166	132.386	122.203	121.433	140.905	120.373	122.761	117.835	119.764	83.2148	0.000780415	0.00234124	0.00702378	0.0210713	0.0632139	0.189642	0.568925	1.70678	5.12033	15.361	46.0829	Letrozole	CYP19A1	Aromatase Inhibitor	N#CC1=CC=C(C=C1)C([N]2C=NC=N2)C3=CC=C(C=C3)C#N
NCGC00016978-05	Repaglinide	NA	Insulin Secretagogues	s-ewing-osteo-TC71-1	activity	1.3	4	-7.87921	4.95492	120.023	113.971	115.455	11	569.552	570.019	0.423518	0.356886	115.523	115.272	110.48	121.479	123.049	122.93	113.378	116.574	119.293	123.542	115.455	0.000780415	0.00234124	0.00702378	0.0210713	0.0632139	0.189642	0.568925	1.70678	5.12033	15.361	46.0829	Repaglinide	NA	Insulin Secretagogues	CCOC1=C(C=CC(=C1)CC(=O)N[C@@H](CC(C)C)C2=C(C=CC=C2)N3CCCCC3)C(O)=O
NCGC00016991-06	Proparacaine	NA	Sodium channel inhibitor	s-ewing-osteo-TC71-1	activity	1.3	4	-5.02921	0.3	100.606	127.523	111.8	11	577.128	577.761	0.529335	0.232818	122.023	132.175	122.818	129.118	116.097	117.395	117.609	123.391	119.606	107.509	111.8	0.000780415	0.00234124	0.00702378	0.0210713	0.0632139	0.189642	0.568925	1.70678	5.12033	15.361	46.0829	Proparacaine	NA	Sodium channel inhibitor	CCCOC1=C(N)C=C(C=C1)C(=O)OCCN(CC)CC
NCGC00016994-16	Camptothecin	TOP1	DNA Topoisomerase I Inhibitors	s-ewing-osteo-TC71-1	activity	4	-1.1	-8.02921	2.40638	3.60857	142.809	3.92956	11	167.745	166.468	0.994725	5.22e-08	147.879	129.891	101.292	14.283	5.16665	4.81003	6.33753	4.51979	3.37466	3.02917	3.92956	0.000780415	0.00234124	0.00702378	0.0210713	0.0632139	0.189642	0.568925	1.70678	5.12033	15.361	46.0829	Camptothecin	TOP1	DNA Topoisomerase I Inhibitors	CC[C@@]1(O)C(=O)OC\C2=C1\C=C\3N(CC4=C3N=C5C=CC=CC5=C4)C2=O
NCGC00017112-11	Ciclopirox	NA	Antifungal Agent	s-ewing-osteo-TC71-1	activity	4	-1.1	-5.27921	2.24812	14.1909	110.085	12.1555	11	435.171	437.461	0.981081	7.8385e-06	99.538	106.726	111.562	114.834	109.394	108.589	117.625	105.428	59.3793	26.5889	12.1555	0.000780415	0.00234124	0.00702378	0.0210713	0.0632139	0.189642	0.568925	1.70678	5.12033	15.361	46.0829	Ciclopirox	NA	Antifungal Agent	CC/1=C/C(=O)N(O)/C(=C1)C2CCCCC2
NCGC00017156-01	Cefoperazone sodium	NA	Cephalosporin antibiotic	s-ewing-osteo-TC71-1	activity	1.3	1.2	-7.77435	0.4	130.297	101.918	117.443	11	639.16	639.542	0.807672	0.0396142	107.297	105.314	111.899	115.322	115.071	119.547	118.081	132.279	120.713	129.04	117.443	0.000226313	0.000678986	0.00203691	0.00611069	0.018332	0.0549961	0.164988	0.494965	1.4849	4.45469	13.3641	Cefoperazone sodium	NA	Cephalosporin antibiotic	O.O.CCN1CCN(C(=O)N[C@H](C(=O)N[C@H]2[C@@H]3SC\C(=C(/N3C2=O)C(O)=O)CSC4=NN=N[N]4C)C5=CC=C(O)C=C5)C(=O)C1=O
NCGC00017159-08	Curcumin	NFKB1	NF-kappaB Activation Inhibitor	s-ewing-osteo-TC71-1	activity	4	-2.1	-4.66797	2.25265	-6.57597	124.342	3.63389	11	533.049	534.074	0.980325	9.1202e-06	122.353	116.293	118.483	133.497	136.218	123.094	125.131	121.276	103.306	29.4909	3.63389	0.00156083	0.00468253	0.0140476	0.0421426	0.126428	0.379284	1.13785	3.41355	10.2407	30.722	92.1659	Curcumin	NFKB1	NF-kappaB Activation Inhibitor	COC1=CC(=CC=C1O)/C=C/C(=O)CC(=O)/C=C/C2=CC(=C(O)C=C2)OC
NCGC00017223-03	Ursolic acid	STAT3	STAT-3 Inhibitor	s-ewing-osteo-TC71-1	activity	1.1	-1.2	-5.76797	4.95492	83.5787	127.053	87.8519	11	556.346	556.871	0.92311	0.00144018	119.053	125.148	120.99	126.461	135.77	135.833	122.566	84.9951	74.7756	88.9101	87.8519	0.00156083	0.00468253	0.0140476	0.0421426	0.126428	0.379284	1.13785	3.41355	10.2407	30.722	92.1659	Ursolic acid	STAT3	STAT-3 Inhibitor	C[C@@H]1CC[C@@]2(CC[C@]3(C)\C(=C/C[C@@H]4[C@@]5(C)CC[C@H](O)C(C)(C)[C@@H]5CC[C@@]34C)[C@@H]2[C@H]1C)C(O)=O
NCGC00017236-08	Baicalein	CYP2C9	Cyp2C9 Inhibitor	s-ewing-osteo-TC71-1	activity	2.3	-2.2	-4.62921	4.09497	84.9026	147.25	89.5273	11	687.205	687.901	0.866406	0.0091195	147.317	148.175	154.3	160.196	150.56	141.157	144.114	148.817	133.391	135.993	89.5273	0.000780415	0.00234124	0.00702378	0.0210713	0.0632139	0.189642	0.568925	1.70678	5.12033	15.361	46.0829	Baicalein	CYP2C9	Cyp2C9 Inhibitor	OC1=CC2=C(C(=O)\C=C(/O2)C3=CC=CC=C3)C(=C1O)O
NCGC00017244-05	Enoxolone	NA	15-hydroxyprostaglandin dehydrogenase inhibitor	s-ewing-osteo-TC71-1	activity	1.3	4	-5.22921	3.92947	115.203	135.28	117.818	11	631.819	632.462	0.699414	0.0895749	127.28	135.264	138.05	135.038	142.787	134.824	125.949	141.331	127.988	113.049	117.818	0.000780415	0.00234124	0.00702378	0.0210713	0.0632139	0.189642	0.568925	1.70678	5.12033	15.361	46.0829	Enoxolone	NA	15-hydroxyprostaglandin dehydrogenase inhibitor	CC1(C)[C@@H](O)CC[C@@]2(C)[C@H]1CC[C@]3(C)[C@@H]2C(=O)\C=C/4[C@@H]5C[C@](C)(CC[C@]5(C)CC[C@@]34C)C(O)=O
NCGC00017245-12	Ellagic acid	AKR1B1	Aldose Reductase Inhibitor	s-ewing-osteo-TC71-1	activity	5	4	NA	NA	NA	NA	129.558	11	NA	648.305	NA	NA	130.891	135.039	129.981	137.08	138.812	137.152	139.765	134.856	134.283	131.968	129.558	0.000780415	0.00234124	0.00702378	0.0210713	0.0632139	0.189642	0.568925	1.70678	5.12033	15.361	46.0829	Ellagic acid	AKR1B1	Aldose Reductase Inhibitor	OC1=CC2=C3C(=C1O)OC(=O)C4=CC(=C(O)C(=C34)OC2=O)O
NCGC00017248-10	Embelin	XIAP	X-Chromosome-Linked Inhibitor of Apoptosis Protein (XIAP) Inhibitors	s-ewing-osteo-TC71-1	activity	2.3	-3	-4.47921	4.95492	82.9444	134.273	91.5362	11	633.116	634.803	0.765027	0.0478415	125.915	124.607	130.705	130.425	129.25	138.389	148.696	140.2	139.75	132.94	91.5362	0.000780415	0.00234124	0.00702378	0.0210713	0.0632139	0.189642	0.568925	1.70678	5.12033	15.361	46.0829	Embelin	XIAP	X-Chromosome-Linked Inhibitor of Apoptosis Protein (XIAP) Inhibitors	CCCCCCCCCCCC/1=C(O)/C(=O)/C=C(O)\C1=O
NCGC00017254-02	Cyanein	GBF1	Golgi-Specific Brefeldin A-Resistance Guanine Nucleotide Exchange Factor 1 (GBF1) Inhibitors	s-ewing-osteo-TC71-1	activity	4	4	NA	NA	NA	NA	3.59621	11	NA	25.0291	NA	NA	4.28914	5.5629	5.80507	6.32906	5.6166	6.30728	6.11902	4.50531	4.03214	3.97153	3.59621	0.000780415	0.00234124	0.00702378	0.0210713	0.0632139	0.189642	0.568925	1.70678	5.12033	15.361	46.0829	Cyanein	GBF1	Golgi-Specific Brefeldin A-Resistance Guanine Nucleotide Exchange Factor 1 (GBF1) Inhibitors	C[C@H]1CCC/C=C/C2C[C@H](O)C[C@H]2[C@H](O)\C=C\C(=O)O1
NCGC00017256-08	Galantamine hydrobromide	ACHE	Acetylcholinesterase Inhibitors	s-ewing-osteo-TC71-1	activity	2.1	-2.1	-4.67921	2.25265	52.7932	141.768	54.6677	11	644.589	640.811	0.939327	0.000622072	148.393	134.707	150.918	140.239	142.122	137.38	134.191	143.88	135.364	118.685	54.6677	0.000780415	0.00234124	0.00702378	0.0210713	0.0632139	0.189642	0.568925	1.70678	5.12033	15.361	46.0829	Galantamine hydrobromide	ACHE	Acetylcholinesterase Inhibitors	COC1=CC=C2CN(C)CC[C@@]34\C=C/[C@H](O)C[C@@H]3OC1=C24
NCGC00017269-06	Formononetin	MAOA	MAO Inhibitor	s-ewing-osteo-TC71-1	activity	2.3	4	-4.92921	4.09497	103.669	126.274	125.621	11	592.362	595.327	0.605006	0.192776	117.774	131.118	128.475	128.292	127.869	131.036	121.414	122.927	125.582	109.353	125.621	0.000780415	0.00234124	0.00702378	0.0210713	0.0632139	0.189642	0.568925	1.70678	5.12033	15.361	46.0829	Formononetin	MAOA	MAO Inhibitor	COC1=CC=C(C=C1)C/2=C/OC3=CC(=CC=C3C2=O)O
NCGC00017280-22	Tretinoin	RORB	Retinoid RAR Agonists? Retinoid RORbeta Ligand	s-ewing-osteo-TC71-1	activity	4	-3	-4.47921	4.95492	-4.24665	118.14	15.8694	11	538.56	540.326	0.971633	3.70852e-05	107.999	112.09	115.275	117.939	120.876	118.393	118.193	128.545	119.38	118.667	15.8694	0.000780415	0.00234124	0.00702378	0.0210713	0.0632139	0.189642	0.568925	1.70678	5.12033	15.361	46.0829	Tretinoin	RORB	Retinoid RAR Agonists? Retinoid RORbeta Ligand	C/C1=C(\C=C\C(C)=C\C=C\C(C)=C\C(O)=O)C(C)(C)CCC1
NCGC00017312-03	Uridine	NA	Anti-anxiety drug	s-ewing-osteo-TC71-1	activity	2.3	-2.4	-4.52921	0.3	76.5095	128.569	89.5087	11	562.559	564.075	0.666767	0.113954	130.131	127.041	118.796	126.189	118.671	119.288	110.993	115.836	110.973	117.992	89.5087	0.000780415	0.00234124	0.00702378	0.0210713	0.0632139	0.189642	0.568925	1.70678	5.12033	15.361	46.0829	Uridine	NA	Anti-anxiety drug	OC[C@H]1O[C@H]([C@H](O)[C@@H]1O)N2\C=C/C(=O)NC2=O
NCGC00017323-07	Tetracycline hydrochloride	NA	30S Ribosomal Protein Inhibitors	s-ewing-osteo-TC71-1	activity	1.1	-2.2	-5.42921	1.21	80.5704	137.758	79.0184	11	596.646	596.93	0.954596	0.000216466	139.361	132.684	140.044	139.087	132.061	136.197	139.395	119.764	99.792	97.0236	79.0184	0.000780415	0.00234124	0.00702378	0.0210713	0.0632139	0.189642	0.568925	1.70678	5.12033	15.361	46.0829	Tetracycline hydrochloride	NA	30S Ribosomal Protein Inhibitors	CN(C)[C@H]\1[C@@H]2C[C@H]3C(=C(O)\[C@]2(O)C(=O)\C(=C1O)C(N)=O)/C(=O)C4=C(O)C=CC=C4[C@@]3(C)O
NCGC00017324-08	Simvastatin	HMGCR	HMG-CoA Reductase Inhibitor	s-ewing-osteo-TC71-1	activity	4	-2.1	-4.92921	1.24751	-11.0612	123.706	8.2546	11	501.888	503.57	0.984901	3.2672e-06	121.877	120.827	115.299	130.213	125.953	123.277	121.808	120.489	83.3707	48.5179	8.2546	0.000780415	0.00234124	0.00702378	0.0210713	0.0632139	0.189642	0.568925	1.70678	5.12033	15.361	46.0829	Simvastatin	HMGCR	HMG-CoA Reductase Inhibitor	CCC(C)(C)C(=O)O[C@H]1C[C@@H](C)\C=C2\C=C/[C@H](C)[C@H](CC[C@@H]3C[C@@H](O)CC(=O)O3)[C@@H]12
NCGC00017337-15	Capsaicin	NFKB1	NF-kappaB Activation Inhibitor	s-ewing-osteo-TC71-1	activity	2.1	-2.2	-4.77921	1.24751	55.4406	127.207	69.887	11	570.837	571.628	0.935393	0.000779286	125.45	119.135	128.635	132.996	134.743	120.508	127.073	126.71	109.774	95.6447	69.887	0.000780415	0.00234124	0.00702378	0.0210713	0.0632139	0.189642	0.568925	1.70678	5.12033	15.361	46.0829	Capsaicin	NFKB1	NF-kappaB Activation Inhibitor	COC1=C(O)C=CC(=C1)CNC(=O)CCCC\C=C\C(C)C
NCGC00017338-05	Antimycin A	NA	Antifungal Agent	s-ewing-osteo-TC71-1	activity	1.1	-1.2	-7.27921	3.98997	62.6881	124.413	57.8704	11	413.36	416.117	0.971263	3.89598e-05	116.913	124.06	122.945	132.417	83.3896	66.2877	69.242	63.6897	62.0311	56.3888	57.8704	0.000780415	0.00234124	0.00702378	0.0210713	0.0632139	0.189642	0.568925	1.70678	5.12033	15.361	46.0829	Antimycin A	NA	Antifungal Agent	CCCCCC[C@@H]1[C@@H](OC(=O)CC(C)C)[C@H](C)OC(=O)[C@@H](NC(=O)C2=C(O)C(=CC=C2)NC=O)[C@@H](C)OC1=O
NCGC00017344-06	Fisetin	SIRT1	Histone Deacetylase/SIRT1 Activator	s-ewing-osteo-TC71-1	activity	4	-2.1	-4.72921	2.40638	11.7633	123.315	13.8577	11	542.328	541.596	0.971744	3.65376e-05	118.582	120.67	120.663	124.064	118.327	127.548	127.279	132.186	112.304	84.8422	13.8577	0.000780415	0.00234124	0.00702378	0.0210713	0.0632139	0.189642	0.568925	1.70678	5.12033	15.361	46.0829	Fisetin	SIRT1	Histone Deacetylase/SIRT1 Activator	OC1=CC2=C(C=C1)C(=O)\C(=C(O2)\C3=CC(=C(O)C=C3)O)O
NCGC00017352-23	Resveratrol	PTGS2	Cyclooxygenase-2 Inhibitor	s-ewing-osteo-TC71-1	activity	1.1	-2.2	-4.82921	2.04374	54.9193	136.89	61.0104	11	612.735	613.766	0.988346	1.1889e-06	137.149	136.121	138.341	134.932	137.002	143.6	135.059	132.404	129.448	95.8786	61.0104	0.000780415	0.00234124	0.00702378	0.0210713	0.0632139	0.189642	0.568925	1.70678	5.12033	15.361	46.0829	Resveratrol	PTGS2	Cyclooxygenase-2 Inhibitor	OC1=CC=C(C=C1)/C=C/C2=CC(=CC(=C2)O)O
NCGC00017354-06	Spectinomycin hydrochloride	NA	Antibiotic	s-ewing-osteo-TC71-1	activity	4	-1.1	-5.87921	3.57225	2.05857	134.283	1.53032	11	435.462	436.403	0.99684	6.8e-09	133.593	139.597	135.969	127.872	134.809	129.385	132.782	41.8717	3.09306	1.60332	1.53032	0.000780415	0.00234124	0.00702378	0.0210713	0.0632139	0.189642	0.568925	1.70678	5.12033	15.361	46.0829	Spectinomycin hydrochloride	NA	Antibiotic	CN[C@@H]1[C@H](O)[C@H](NC)[C@H]2O[C@]3(O)[C@@H](O[C@H](C)CC3=O)O[C@@H]2[C@H]1O
NCGC00017358-14	Rotenone	NDUFAF1	NADH-Ubiquinone Oxidoreductase (Complex I) Inhibitor	s-ewing-osteo-TC71-1	activity	4	-1.1	-5.32921	0.7	-4.11148	127.877	21.3907	11	464.311	463.632	0.982963	5.2246e-06	126.771	131.947	124.386	121.836	126.042	109.936	97.5232	93.8664	61.6471	28.8748	21.3907	0.000780415	0.00234124	0.00702378	0.0210713	0.0632139	0.189642	0.568925	1.70678	5.12033	15.361	46.0829	Rotenone	NDUFAF1	NADH-Ubiquinone Oxidoreductase (Complex I) Inhibitor	COC1=CC2=C(C=C1OC)[C@H]3[C@@H](CO2)OC4=C(C=CC5=C4C[C@@H](O5)C(C)=C)C3=O
NCGC00017363-10	cycloheximide	GSK3B	GSK-3beta Inhibitor; tau Protein Kinase I Inhibitor	s-ewing-osteo-TC71-1	activity	4	-1.1	-6.62921	0.6	3.95949	148.244	5.01281	11	375.853	378.719	0.988976	9.556e-07	136.678	141.09	137.257	124.282	107.464	70.5137	56.1482	39.5116	31.7086	14.5644	5.01281	0.000780415	0.00234124	0.00702378	0.0210713	0.0632139	0.189642	0.568925	1.70678	5.12033	15.361	46.0829	cycloheximide	GSK3B	GSK-3beta Inhibitor; tau Protein Kinase I Inhibitor	C[C@H]1C[C@H](C)C(=O)[C@@H](C1)[C@H](O)CC2CC(=O)NC(=O)C2
NCGC00017364-14	Caffeic acid	NA	PPAR modulator	s-ewing-osteo-TC71-1	activity	2.3	-2.2	-4.72921	1.88512	90.5841	143.663	93.884	11	665.509	667.163	0.89219	0.0045544	138.163	149.123	149.111	149.442	140.819	142.408	143.8	139.398	132.315	128.898	93.884	0.000780415	0.00234124	0.00702378	0.0210713	0.0632139	0.189642	0.568925	1.70678	5.12033	15.361	46.0829	Caffeic acid	NA	PPAR modulator	OC(=O)/C=C/C1=CC(=C(O)C=C1)O
NCGC00017369-10	Biochanin A	NA	flavanoid	s-ewing-osteo-TC71-1	activity	2.3	4	-4.62921	4.50447	95.1874	121.303	96.4567	11	574.616	576.951	0.663069	0.116942	112.803	112.137	123.773	119.195	120.082	128.287	126.37	127.694	121.731	118.172	96.4567	0.000780415	0.00234124	0.00702378	0.0210713	0.0632139	0.189642	0.568925	1.70678	5.12033	15.361	46.0829	Biochanin A	NA	flavanoid	COC1=CC=C(C=C1)C/2=C/OC3=C(C(=CC(=C3)O)O)C2=O
NCGC00017376-10	Tetrandrine	NA	Calcium Channel Blocker	s-ewing-osteo-TC71-1	activity	2.1	-2.1	-4.67921	1.4641	27.1251	134.085	51.0988	11	595.024	586.622	0.943693	0.00047526	143.306	134.102	121.919	127.743	139.582	127.338	134.039	127.74	119.762	96.2812	51.0988	0.000780415	0.00234124	0.00702378	0.0210713	0.0632139	0.189642	0.568925	1.70678	5.12033	15.361	46.0829	Tetrandrine	NA	Calcium Channel Blocker	COC1=CC=C2C[C@@H]3N(C)CCC4=C3C(=C(OC)C(=C4)OC)OC5=C(OC)C=C6CCN(C)[C@@H](CC7=CC=C(OC1=C2)C=C7)C6=C5
NCGC00017394-08	G-Strophanthin	NKAIN1	Na+/K+-ATPase Inhibitors	s-ewing-osteo-TC71-1	activity	4	-1.1	-7.37921	1.50949	7.13334	115.375	7.35721	11	221.47	220.612	0.996688	8.2e-09	119.293	110.704	109.127	85.4015	48.109	11.436	8.82165	8.62816	8.13199	8.1485	7.35721	0.000780415	0.00234124	0.00702378	0.0210713	0.0632139	0.189642	0.568925	1.70678	5.12033	15.361	46.0829	G-Strophanthin	NKAIN1	Na+/K+-ATPase Inhibitors	C[C@@H]1O[C@@H](O[C@H]2C[C@@H](O)[C@]3(CO)[C@H]4[C@H](O)C[C@]5(C)[C@H](CC[C@]5(O)[C@@H]4CC[C@]3(O)C2)C6=CC(=O)OC6)[C@H](O)[C@H](O)[C@H]1O
NCGC00018099-10	Dyphylline	NA	Xanthine Derivative	s-ewing-osteo-TC71-1	activity	5	4	NA	NA	NA	NA	122.406	11	NA	572.35	NA	NA	113.397	114.928	114.773	121.998	113.533	123.083	122.554	121.674	118.984	121.073	122.406	0.000780415	0.00234124	0.00702378	0.0210713	0.0632139	0.189642	0.568925	1.70678	5.12033	15.361	46.0829	Dyphylline	NA	Xanthine Derivative	CN1C(=O)N(C)C2=C([N](CC(O)CO)C=N2)C1=O
NCGC00018100-02	Fasudil hydrochloride	ROCK1	ROCK Inhibitor	s-ewing-osteo-TC71-1	activity	2.3	4	-4.57921	4.50447	93.9784	126.176	96.2055	11	597.066	599.675	0.62002	0.152069	116.39	117.122	124.213	118.393	127.682	134.947	127.842	138.107	131.882	123.229	96.2055	0.000780415	0.00234124	0.00702378	0.0210713	0.0632139	0.189642	0.568925	1.70678	5.12033	15.361	46.0829	Fasudil hydrochloride	ROCK1	ROCK Inhibitor	[O-][S+](=O)(N1CCCNCC1)C2=C3C=CN=CC3=CC=C2
NCGC00018102-06	Flunarizine	NA	Calcium Channel Blocker	s-ewing-osteo-TC71-1	activity	2.3	-3	-4.57921	4.09497	76.5908	126.121	81.1782	11	591.531	591.161	0.893195	0.00441663	123.211	126.28	131.637	125.067	132.985	124.075	131.506	117.489	121.551	120.202	81.1782	0.000780415	0.00234124	0.00702378	0.0210713	0.0632139	0.189642	0.568925	1.70678	5.12033	15.361	46.0829	Flunarizine	NA	Calcium Channel Blocker	Fc1ccc(cc1)C(c2ccc(F)cc2)N3CCN(CC3)C/C=C/c4ccccc4
NCGC00018117-23	Theophyllamine	ADORA1	Adenosine Receptor Antagonist	s-ewing-osteo-TC71-1	activity	1.3	4	-5.47921	4.95492	126.852	139.825	124.348	11	656.583	658.912	0.653314	0.124896	134.325	140.272	140.444	135.104	136.148	142.307	144.428	146.425	125.562	131.755	124.348	0.000780415	0.00234124	0.00702378	0.0210713	0.0632139	0.189642	0.568925	1.70678	5.12033	15.361	46.0829	Theophyllamine	ADORA1	Adenosine Receptor Antagonist	CN1C(=O)N(C)C2=C([NH]C=N2)C1=O
NCGC00018139-08	Ipriflavone	NA	Treatment of Osteoporosis	s-ewing-osteo-TC71-1	activity	4	-3	-4.47921	4.95492	4.10999	127.858	24.6032	11	584.942	585.467	0.975362	2.16615e-05	121.269	128.612	123.481	132.886	125.4	134.412	130.96	131.997	119.002	125.566	24.6032	0.000780415	0.00234124	0.00702378	0.0210713	0.0632139	0.189642	0.568925	1.70678	5.12033	15.361	46.0829	Ipriflavone	NA	Treatment of Osteoporosis	CC(C)OC1=CC=C2C(=C1)O\C=C(/C2=O)C3=CC=CC=C3
NCGC00018153-09	Dienestrol	ESR1	Estrogen Receptor (ER) Agonist	s-ewing-osteo-TC71-1	activity	4	-3	-4.52921	4.09497	5.00048	132.131	22.8982	11	601.209	598.982	0.977198	1.60978e-05	136.175	127.898	135.477	138.432	133.831	126.784	137.67	126.672	123.533	123.872	22.8982	0.000780415	0.00234124	0.00702378	0.0210713	0.0632139	0.189642	0.568925	1.70678	5.12033	15.361	46.0829	Dienestrol	ESR1	Estrogen Receptor (ER) Agonist	C\C=C(C1=CC=C(O)C=C1)\C(=C\C)C2=CC=C(O)C=C2
NCGC00018157-11	Flurbiprofen	NA	non-steroidal antiinflammatory	s-ewing-osteo-TC71-1	activity	2.1	-3	-4.52921	4.09497	39.9518	134.789	53.0219	11	622.593	623.058	0.967559	6.16765e-05	131.366	132.097	136.021	139.721	136.243	144.573	128.246	133.548	130.904	128.383	53.0219	0.000780415	0.00234124	0.00702378	0.0210713	0.0632139	0.189642	0.568925	1.70678	5.12033	15.361	46.0829	Flurbiprofen	NA	non-steroidal antiinflammatory	CC(C(O)=O)C1=CC=C(C(=C1)F)C2=CC=CC=C2
NCGC00018158-08	Doxazosin mesylate	ADRA1A	alpha1-Adrenoceptor Antagonists	s-ewing-osteo-TC71-1	activity	2.1	-2.2	-4.77921	1.41632	66.4923	127.592	73.9079	11	579.935	579.683	0.935881	0.000758682	126.877	124.486	128.639	122.194	131.123	131.756	129.081	128.051	109.768	103.981	73.9079	0.000780415	0.00234124	0.00702378	0.0210713	0.0632139	0.189642	0.568925	1.70678	5.12033	15.361	46.0829	Doxazosin mesylate	ADRA1A	alpha1-Adrenoceptor Antagonists	COC1=C(OC)C=C2C(=NC(=NC2=C1)N3CCN(CC3)C(=O)C4COC5=C(O4)C=CC=C5)N
NCGC00018172-08	Indapamide	CA7	Carbonic Anhydrase Type VII Inhibitor	s-ewing-osteo-TC71-1	activity	2.3	-2.2	-4.67921	1.62662	94.9204	140.024	98.3217	11	652.85	652.051	0.840963	0.0156717	140.839	141.227	143.915	146.467	139.485	136.021	143.378	129.517	130.669	129.075	98.3217	0.000780415	0.00234124	0.00702378	0.0210713	0.0632139	0.189642	0.568925	1.70678	5.12033	15.361	46.0829	Indapamide	CA7	Carbonic Anhydrase Type VII Inhibitor	CC1CC2=C(C=CC=C2)N1NC(=O)C3=CC=C(Cl)C(=C3)[S+](N)([O-])=O
NCGC00018176-04	Estrone	NA	Steroid hormone	s-ewing-osteo-TC71-1	activity	1.3	-2.2	-4.82921	0.7	67.9634	122.824	80.7386	11	548.982	550.603	0.808866	0.0269729	117.824	114.669	129.773	123.058	134.321	114.882	113.853	111.59	105.595	100.994	80.7386	0.000780415	0.00234124	0.00702378	0.0210713	0.0632139	0.189642	0.568925	1.70678	5.12033	15.361	46.0829	Estrone	NA	Steroid hormone	C[C@]12CCC3C(CCC4=C3C=CC(=C4)O)C1CCC2=O
NCGC00018181-13	Nalidixic acid	NA	Quinoline Antibiotic	s-ewing-osteo-TC71-1	activity	1.3	4	-8.07921	1.82648	124.984	112.984	128.912	11	588.363	588.455	0.752585	0.0552643	111.484	116.945	115.856	125.782	127.022	126.05	121.749	121.926	122.342	125.902	128.912	0.000780415	0.00234124	0.00702378	0.0210713	0.0632139	0.189642	0.568925	1.70678	5.12033	15.361	46.0829	Nalidixic acid	NA	Quinoline Antibiotic	CCN1\C=C(\C(O)=O)C(=O)C2=CC=C(C)N=C12
NCGC00018185-07	Tranilast	TNF	TNF-alpha Production Inhibitor	s-ewing-osteo-TC71-1	activity	2.1	-3	-4.62921	4.09497	84.7544	136.62	88.944	11	639.572	638.567	0.928383	0.00112354	139.536	143.102	135.288	128.65	137.476	138.312	136.287	131.788	139.873	126.752	88.944	0.000780415	0.00234124	0.00702378	0.0210713	0.0632139	0.189642	0.568925	1.70678	5.12033	15.361	46.0829	Tranilast	TNF	TNF-alpha Production Inhibitor	COC1=CC=C(\C=C\C(=O)NC2=CC=CC=C2C(O)=O)C=C1OC
NCGC00018193-06	Fluvoxamine	HTR1A	5-HT Reuptake Inhibitor	s-ewing-osteo-TC71-1	activity	2.3	-2.2	-4.72921	2.72022	55.4701	120.791	55.3752	11	551.605	552.527	0.894843	0.0041906	116.39	111.272	124.864	120.604	121.073	137.361	121.437	114.508	118.17	98.758	55.3752	0.000780415	0.00234124	0.00702378	0.0210713	0.0632139	0.189642	0.568925	1.70678	5.12033	15.361	46.0829	Fluvoxamine	HTR1A	5-HT Reuptake Inhibitor	FC(F)(F)c1ccc(cc1)C(\CCCCOC)=N\OCCN
NCGC00018199-06	Rhein	NA	component of rhubarb	s-ewing-osteo-TC71-1	activity	1.3	4	-4.91797	1.47809	122.043	138.746	122.077	11	673.79	673.756	0.734385	0.0661416	137.246	132.466	141.751	135.247	145.561	136.887	141.269	136.701	130.214	126.75	122.077	0.00156083	0.00468253	0.0140476	0.0421426	0.126428	0.379284	1.13785	3.41355	10.2407	30.722	92.1659	Rhein	NA	component of rhubarb	OC(=O)C1=CC(=C2C(=O)C3=C(O)C=CC=C3C(=O)C2=C1)O
NCGC00018204-11	Vinpocetine	NA	Na channel blocker	s-ewing-osteo-TC71-1	activity	4	-2.1	-4.67921	4.09497	-5.64783	121.145	3.32478	11	535.396	536.693	0.980359	9.0598e-06	115.482	118.077	120.772	127.482	122.848	112.182	122.93	129.167	120.908	90.8413	3.32478	0.000780415	0.00234124	0.00702378	0.0210713	0.0632139	0.189642	0.568925	1.70678	5.12033	15.361	46.0829	Vinpocetine	NA	Na channel blocker	also PDE1	IKK inhibitor	CCOC(=O)\C1=C\[C@]2(CC)CCCN3CCC4=C([C@H]23)[N]1C5=C4C=CC=C5
NCGC00018218-03	Edaravone	NA	Free Radical Scavenger	s-ewing-osteo-TC71-1	activity	1.3	4	-5.47921	0.2	147.374	113.232	140.07	11	605.712	603.593	0.621018	0.151634	123.374	113.672	116.267	125.435	126.004	128.439	130.861	126.748	126.841	128.682	140.07	0.000780415	0.00234124	0.00702378	0.0210713	0.0632139	0.189642	0.568925	1.70678	5.12033	15.361	46.0829	Edaravone	NA	Free Radical Scavenger	C\C1=N\N(C(=O)C1)C2=CC=CC=C2
NCGC00018238-08	Oxibendazole	NA	DNA Polymerase Inhibitors	s-ewing-osteo-TC71-1	activity	4	-1.1	-8.02921	1.24751	29.9339	113.442	28.0869	11	235.409	237.268	0.980758	8.3702e-06	104.999	109.235	72.5885	58.2858	35.1085	30.1553	31.7893	30.9255	30.6788	29.8945	28.0869	0.000780415	0.00234124	0.00702378	0.0210713	0.0632139	0.189642	0.568925	1.70678	5.12033	15.361	46.0829	Oxibendazole	NA	DNA Polymerase Inhibitors	CCCOC1=CC=C2[NH]C(=NC2=C1)NC(=O)OC
NCGC00018248-08	Meloxicam	PTGS1	Cyclooxygenase-1/2 Inhibitor	s-ewing-osteo-TC71-1	activity	1.3	4	-5.87921	4.95492	133.1	122.96	127.519	11	607.324	607.029	0.805882	0.0408273	125.6	119.233	122.391	125.741	126.019	120.634	121.677	130.792	133.565	133.028	127.519	0.000780415	0.00234124	0.00702378	0.0210713	0.0632139	0.189642	0.568925	1.70678	5.12033	15.361	46.0829	Meloxicam	PTGS1	Cyclooxygenase-1/2 Inhibitor	CN1\C(=C(\O)C2=CC=CC=C2[S+]1([O-])=O)C(=O)NC3=NC=C(C)S3
NCGC00018257-07	Methocarbamol	NA	Muscle relaxant	s-ewing-osteo-TC71-1	activity	1.3	1.4	-7.42921	0.3	125.507	103.007	123.261	11	560.141	560.376	0.835506	0.0174857	105.007	111.999	114.911	111.75	112.247	120.061	117.078	120.407	119.893	122.86	123.261	0.000780415	0.00234124	0.00702378	0.0210713	0.0632139	0.189642	0.568925	1.70678	5.12033	15.361	46.0829	Methocarbamol	NA	Muscle relaxant	COC1=C(OCC(O)COC(N)=O)C=CC=C1
NCGC00018258-09	Econazole nitrate	NA	Antifungal Agent	s-ewing-osteo-TC71-1	activity	2.1	-3	-4.47921	4.95492	41.2054	119.607	53.8482	11	556.139	557.088	0.954128	0.000224835	112.107	110.33	121.803	121.297	120.482	123.071	121.764	122.749	118.393	120.738	53.8482	0.000780415	0.00234124	0.00702378	0.0210713	0.0632139	0.189642	0.568925	1.70678	5.12033	15.361	46.0829	Econazole nitrate	NA	Antifungal Agent	ClC1=CC=C(COC(C[N]2C=CN=C2)C3=CC=C(Cl)C=C3Cl)C=C1
NCGC00018261-05	Perhexiline	NA	mitochondrial carnitine palmitoyltransferase-1 inhbitior	s-ewing-osteo-TC71-1	activity	4	-2.1	-4.87921	3.98997	2.51344	128.846	4.19635	11	544.617	544.419	0.994326	6.97e-08	124.404	128.44	122.381	130.419	126.727	131.043	130.308	129.854	131.1	46.1641	4.19635	0.000780415	0.00234124	0.00702378	0.0210713	0.0632139	0.189642	0.568925	1.70678	5.12033	15.361	46.0829	Perhexiline	NA	mitochondrial carnitine palmitoyltransferase-1 inhbitior	C1CCC(CC1)C(CC2CCCCN2)C3CCCCC3
NCGC00018276-03	Famotidine	HRH2	Histamine H2 Receptor Antagonists	s-ewing-osteo-TC71-1	activity	2.1	-2.1	-4.72921	2.72022	33.2181	117.099	34.8131	11	525.618	524.806	0.963387	9.72105e-05	114.563	113.003	110.028	115.049	123.379	124.106	122.421	112.387	114.683	87.613	34.8131	0.000780415	0.00234124	0.00702378	0.0210713	0.0632139	0.189642	0.568925	1.70678	5.12033	15.361	46.0829	Famotidine	HRH2	Histamine H2 Receptor Antagonists	NC(N)=NC1=NC(=CS1)CSCCC(=N)N[S+](N)([O-])=O
NCGC00018294-06	Miconazole nitrate	CYP19A1	antifungal agent; Aromatase Inhibitor	s-ewing-osteo-TC71-1	activity	2.1	-2.2	-4.62921	1.4641	50.2579	125.865	60.4358	11	572.835	571.95	0.929974	0.00103719	133.135	127.985	123.016	124.946	123.659	125.633	126.101	121.176	116.308	108.655	60.4358	0.000780415	0.00234124	0.00702378	0.0210713	0.0632139	0.189642	0.568925	1.70678	5.12033	15.361	46.0829	Miconazole nitrate	CYP19A1	antifungal agent; Aromatase Inhibitor	ClC1=CC=C(COC(C[N]2C=CN=C2)C3=CC=C(Cl)C=C3Cl)C(=C1)Cl
NCGC00018296-08	Meclizine hydrochloride	NR1I3	Constitutive Androstane Receptor Agonist	s-ewing-osteo-TC71-1	activity	2.1	-2.2	-4.67921	1.88512	47.8459	133.754	59.2085	11	605.917	604.792	0.969468	4.90387e-05	140.37	137.189	138.871	128.912	131.267	134.897	133.231	128.189	125.508	105.334	59.2085	0.000780415	0.00234124	0.00702378	0.0210713	0.0632139	0.189642	0.568925	1.70678	5.12033	15.361	46.0829	Meclizine hydrochloride	NR1I3	Constitutive Androstane Receptor Agonist	CC1=CC=CC(=C1)CN2CCN(CC2)C(C3=CC=CC=C3)C4=CC=C(Cl)C=C4
NCGC00018302-08	Trichlormethiazide	NA	Diuretic	s-ewing-osteo-TC71-1	activity	1.3	4	-7.62921	2.72022	125.089	118.71	115.385	11	591.819	590.73	0.39499	0.38081	123.089	118.975	112.773	122.724	122.39	130.274	127.821	126.263	118.939	124.763	115.385	0.000780415	0.00234124	0.00702378	0.0210713	0.0632139	0.189642	0.568925	1.70678	5.12033	15.361	46.0829	Trichlormethiazide	NA	Diuretic	N[S+]([O-])(=O)C1=C(Cl)C=C2NC(N[S+]([O-])(=O)C2=C1)C(Cl)Cl
NCGC00021146-06	Ketanserin	HTR2A	5-HT2A Antagonists?	s-ewing-osteo-TC71-1	activity	1.1	-2.4	-6.12921	4.95492	113.783	136.912	129.762	11	616.482	618.062	0.93001	0.00222875	133.912	137.126	138.509	135.28	135.323	139.998	131.812	109.638	112.946	119.301	129.762	0.000780415	0.00234124	0.00702378	0.0210713	0.0632139	0.189642	0.568925	1.70678	5.12033	15.361	46.0829	Ketanserin	HTR2A	5-HT2A Antagonists?	Fc1ccc(cc1)C(=O)C4CCN(CCN2C(=O)c3ccccc3NC2=O)CC4
NCGC00021191-05	Cortisone acetate	NA	Glucocorticoid steroid	s-ewing-osteo-TC71-1	activity	1.3	1.4	-7.57921	0.3	128.089	100.589	127.391	11	565.657	565.521	0.838915	0.0163683	104.589	113.704	112.817	109.588	114.808	122.084	121.162	119.751	123.265	122.648	127.391	0.000780415	0.00234124	0.00702378	0.0210713	0.0632139	0.189642	0.568925	1.70678	5.12033	15.361	46.0829	Cortisone acetate	NA	Glucocorticoid steroid	CC(=O)OCC(=O)[C@@]1(O)CC[C@H]2[C@@H]3CCC/4=C/C(=O)CC[C@]4(C)[C@H]3C(=O)C[C@]12C
NCGC00021301-04	Fluocinolone acetonide	NA	Glucocorticoid steroid	s-ewing-osteo-TC71-1	activity	2.3	4	-4.52921	0.8	105.311	132.105	111.86	11	621.308	621.701	0.636222	0.138882	134.605	133.709	130.412	134.287	126.262	135.647	133.355	123.866	124.63	129.318	111.86	0.000780415	0.00234124	0.00702378	0.0210713	0.0632139	0.189642	0.568925	1.70678	5.12033	15.361	46.0829	Fluocinolone acetonide	NA	Glucocorticoid steroid	OCC(=O)[C@]45OC(C)(C)O[C@@H]5C[C@@H]3[C@]4(C)C[C@H](O)[C@@]2(F)[C@H]3C[C@H](F)C1=CC(=O)C=C[C@@]12C
NCGC00021305-08	Rapamycin	MTOR	mTOR inhibitor	s-ewing-osteo-TC71-1	activity	4	-3	-4.47921	4.95492	19.9223	80.0828	29.7845	11	370.528	370.934	0.987243	1.6954e-06	80.9165	81.4399	82.1983	78.0958	83.1217	78.5554	79.7557	80.5791	77.4577	78.6761	29.7845	0.000780415	0.00234124	0.00702378	0.0210713	0.0632139	0.189642	0.568925	1.70678	5.12033	15.361	46.0829	Rapamycin	MTOR	mTOR inhibitor	CO[C@@H]1C[C@@H](CC[C@H]1O)C[C@H](C)[C@@H]2CC(=O)[C@H](C)\C=C(C)\[C@@H](O)[C@@H](OC)C(=O)[C@H](C)C[C@H](C)/C=C/C=C/C=C(C)/[C@H](C[C@@H]3CC[C@@H](C)[C@@](O)(O3)C(=O)C(=O)N4CCCC[C@H]4C(=O)O2)OC
NCGC00021336-09	Diclofenac sodium	PTGS1	Cyclooxygenase-1/2/3 Inhibitor	s-ewing-osteo-TC71-1	activity	2.3	-2.4	-4.67921	0.8	85.3792	129.315	97.006	11	594.981	590.173	0.668321	0.112735	133.34	118.018	127.279	122.449	137.258	131.43	123.727	124.598	111.423	118.385	97.006	0.000780415	0.00234124	0.00702378	0.0210713	0.0632139	0.189642	0.568925	1.70678	5.12033	15.361	46.0829	Diclofenac sodium	PTGS1	Cyclooxygenase-1/2/3 Inhibitor	[O-]C(=O)CC1=CC=CC=C1NC2=C(Cl)C=CC=C2Cl
NCGC00021569-08	Enalapril maleate	ACE	Angiotensin-I Converting Enzyme Inhibitor	s-ewing-osteo-TC71-1	activity	2.3	-2.2	-4.77921	1.55795	88.1049	136.115	93.7247	11	628.644	632.537	0.811615	0.0258687	121.824	142.273	136.034	142.922	145.18	134.041	135.861	129.606	128.794	116.292	93.7247	0.000780415	0.00234124	0.00702378	0.0210713	0.0632139	0.189642	0.568925	1.70678	5.12033	15.361	46.0829	Enalapril maleate	ACE	Angiotensin-I Converting Enzyme Inhibitor	CCOC(=O)[C@H](CCC1=CC=CC=C1)N[C@@H](C)C(=O)N2CCC[C@H]2C(O)=O
NCGC00021925-04	Prednisolone acetate	NA	Glucocorticoid steroid	s-ewing-osteo-TC71-1	activity	1.3	-2.2	-5.02921	1.50949	90.1427	122.238	91.9087	11	563.326	564.743	0.898417	0.00374195	115.738	122.712	120.756	128.121	118.669	123.878	122.895	123.468	110.205	102.294	91.9087	0.000780415	0.00234124	0.00702378	0.0210713	0.0632139	0.189642	0.568925	1.70678	5.12033	15.361	46.0829	Prednisolone acetate	NA	Glucocorticoid steroid	CC(=O)OCC(=O)[C@@]1(O)CC[C@H]2[C@@H]3CCC/4=C/C(=O)/C=C\[C@]4(C)[C@H]3[C@@H](O)C[C@]12C
NCGC00022001-14	Podofilox	IGFR1	Antimitotic Agent; IGF-1R Inhibitors	s-ewing-osteo-TC71-1	activity	4	4	-8.77921	3.2975	27.3278	17.3278	27.6959	11	127.943	127.433	0.852046	0.0129928	18.3278	24.6932	26.2787	25.6878	26.7994	26.6035	28.275	29.364	28.4279	25.8884	27.6959	0.000780415	0.00234124	0.00702378	0.0210713	0.0632139	0.189642	0.568925	1.70678	5.12033	15.361	46.0829	Podofilox	IGFR1	Antimitotic Agent; IGF-1R Inhibitors	COC1=C(OC)C(=CC(=C1)[C@H]2[C@@H]3[C@H](COC3=O)[C@@H](O)C4=CC5=C(OCO5)C=C24)OC
NCGC00022037-06	Medroxyprogesterone acetate	PGR	Progesterone Receptor Agonist	s-ewing-osteo-TC71-1	activity	2.1	-3	-4.47921	4.95492	48.1283	124.305	60.6986	11	579.256	580.989	0.906906	0.00278309	113.278	118.071	116.574	121.486	128.641	129.791	131.241	131.004	125.32	124.072	60.6986	0.000780415	0.00234124	0.00702378	0.0210713	0.0632139	0.189642	0.568925	1.70678	5.12033	15.361	46.0829	Medroxyprogesterone acetate	PGR	Progesterone Receptor Agonist	C[C@H]1C[C@@H]2[C@H](CC[C@@]3(C)[C@H]2CC[C@]3(OC(C)=O)C(C)=O)[C@@]\4(C)CCC(=O)\C=C14
NCGC00022398-06	Fluocinonide	NA	Glucocorticoid steroid	s-ewing-osteo-TC71-1	activity	1.3	4	-6.27921	0.5	133.912	116.412	124.128	11	595.095	594.729	0.786478	0.0515477	116.412	116.614	117.348	123.502	121.863	118.061	124.86	132.027	127.797	130.992	124.128	0.000780415	0.00234124	0.00702378	0.0210713	0.0632139	0.189642	0.568925	1.70678	5.12033	15.361	46.0829	Fluocinonide	NA	Glucocorticoid steroid	CC(=O)OCC(=O)[C@@]12OC(C)(C)O[C@@H]1C[C@H]3[C@@H]4C[C@H](F)C/5=C/C(=O)/C=C\[C@]5(C)[C@@]4(F)[C@@H](O)C[C@]23C
NCGC00022567-08	Cladribine	ADA	Adenosine Deaminase Inhibitor	s-ewing-osteo-TC71-1	activity	4	-1.1	-6.42921	1.37226	6.26458	132.389	5.78484	11	367.884	370.291	0.99608	1.61e-08	125.719	134.619	139.181	126.005	124.706	97.0143	50.5307	19.901	11.0544	6.90066	5.78484	0.000780415	0.00234124	0.00702378	0.0210713	0.0632139	0.189642	0.568925	1.70678	5.12033	15.361	46.0829	Cladribine	ADA	Adenosine Deaminase Inhibitor	NC1=NC(=NC2=C1N=C[N]2[C@H]3C[C@H](O)[C@@H](CO)O3)Cl
NCGC00022612-10	Cefaclor	NA	Cephalosporin antibiotic	s-ewing-osteo-TC71-1	activity	1.3	4	-5.17921	0.3	142.172	117.172	131.078	11	598.638	599.623	0.591768	0.177026	116.172	123.847	119.344	120.165	119.509	127.69	125.741	126.24	121.978	138.878	131.078	0.000780415	0.00234124	0.00702378	0.0210713	0.0632139	0.189642	0.568925	1.70678	5.12033	15.361	46.0829	Cefaclor	NA	Cephalosporin antibiotic	N[C@@H](C(=O)N[C@H]1[C@H]2SC\C(=C(/N2C1=O)C(O)=O)Cl)C3=CC=CC=C3
NCGC00022678-07	Rifampicin	PRKDC	DNA-Directed RNA Polymerase Inhibitor	s-ewing-osteo-TC71-1	activity	2.3	-3	-5.17301	3.2475	99.1626	141.251	105.98	11	732.496	734.33	0.845208	0.0144416	134.994	137.367	151.121	139.231	145.283	145.381	137.499	141.605	139.322	136.237	105.98	0.000187281	0.000561889	0.00168571	0.0050571	0.0151713	0.045514	0.136542	0.409626	1.22888	3.68664	11.0599	Rifampicin	PRKDC	DNA-Directed RNA Polymerase Inhibitor	CO[C@H]1\C=C\O[C@@]2(C)OC3=C(C2=O)C4=C(O)C(=C(NC(=O)\C(=C/C=C/[C@H](C)[C@H](O)[C@@H](C)[C@@H](O)[C@@H](C)[C@H](OC(C)=O)[C@@H]1C)C)C(=C4C(=C3C)O)O)\C=N\N5CCN(C)CC5
NCGC00022735-07	Methylprednisolone	NA	glucocorticoid receptor antagonist	s-ewing-osteo-TC71-1	activity	5	4	NA	NA	NA	NA	115.355	11	NA	555.141	NA	NA	115.447	112.102	116.894	115.064	112.47	115.99	111.521	117.335	117.353	120.825	115.355	0.000780415	0.00234124	0.00702378	0.0210713	0.0632139	0.189642	0.568925	1.70678	5.12033	15.361	46.0829	Methylprednisolone	NA	glucocorticoid receptor antagonist	C[C@H]1C[C@H]2[C@@H]3CC[C@](O)(C(=O)CO)[C@@]3(C)C[C@H](O)[C@@H]2[C@@]\4(C)/C=C\C(=O)\C=C14
NCGC00022819-03	Ipratropium bromide hydrate	NA	Muscarinic Antagonists	s-ewing-osteo-TC71-1	activity	1.3	4	-8.12921	0.5	131.838	106.838	120.336	11	603.31	603.42	0.731059	0.088041	110.838	116.53	120.109	124.053	124.638	130.879	119.165	134.421	134.75	130.057	120.336	0.000780415	0.00234124	0.00702378	0.0210713	0.0632139	0.189642	0.568925	1.70678	5.12033	15.361	46.0829	Ipratropium bromide hydrate	NA	Muscarinic Antagonists	[Br-].O.C[N+]2(C1CC(CC2CC1)OC(=O)C(CO)c3ccccc3)C(C)C
NCGC00022848-06	Hydrocortisone	PTGS2	immunosuppressant	s-ewing-osteo-TC71-1	activity	1.3	4	-7.27921	3.98997	129.539	121.503	121.479	11	608.062	607.57	0.696325	0.115391	120.539	126.778	119.259	119.413	126.717	132.263	130.86	128.868	126.201	128.81	121.479	0.000780415	0.00234124	0.00702378	0.0210713	0.0632139	0.189642	0.568925	1.70678	5.12033	15.361	46.0829	Hydrocortisone	PTGS2	immunosuppressant	OCC(=O)[C@@]4(O)CC[C@@H]2[C@]4(C)C[C@H](O)[C@@H]1[C@@]3(C)CCC(=O)C=C3CC[C@H]12
NCGC00022858-07	Sodium cromoglycate	NA	Mediator Release Inhibitors	s-ewing-osteo-TC71-1	activity	1.3	4	-6.47921	0.8	112.007	101.766	112.412	11	511.518	509.834	0.597681	0.172224	108.507	99.2242	95.3893	103.857	106.91	103.91	109.398	108.765	110.866	111.435	112.412	0.000780415	0.00234124	0.00702378	0.0210713	0.0632139	0.189642	0.568925	1.70678	5.12033	15.361	46.0829	Sodium cromoglycate	NA	Mediator Release Inhibitors	OC(COC1=C2C(=O)\C=C(/OC2=CC=C1)C([O-])=O)COC3=C4C(=O)\C=C(/OC4=CC=C3)C([O-])=O
NCGC00023037-06	Pancuronium bromide	NA	Steroid non-depolarizing blocker	s-ewing-osteo-TC71-1	activity	4	-1.1	-5.97921	4.95492	25.9208	129.232	24.96	11	446.786	448.299	0.990895	4.509e-07	121.042	124.887	128.477	132.451	126.216	134.161	132.311	29.1297	29.5803	27.5231	24.96	0.000780415	0.00234124	0.00702378	0.0210713	0.0632139	0.189642	0.568925	1.70678	5.12033	15.361	46.0829	Pancuronium bromide	NA	Steroid non-depolarizing blocker	CC(=O)O[C@H]1C[C@@H]2CC[C@@H]3[C@H](CC[C@@]4(C)[C@H]3C[C@@H]([C@@H]4OC(C)=O)[N+]5(C)CCCCC5)[C@@]2(C)C[C@@H]1[N+]6(C)CCCCC6
NCGC00023193-04	Triamcinolone acetonide	NA	Glucocorticoid steroid	s-ewing-osteo-TC71-1	activity	2.3	4	-4.42921	4.95492	83.391	114.16	90.6025	11	542.288	545.014	0.655137	0.123259	106.66	107.177	114.358	123.339	114.222	111.53	118.853	120.347	111.292	115.819	90.6025	0.000780415	0.00234124	0.00702378	0.0210713	0.0632139	0.189642	0.568925	1.70678	5.12033	15.361	46.0829	Triamcinolone acetonide	NA	Glucocorticoid steroid	OCC(=O)[C@@]54OC(C)(C)O[C@@H]5C[C@@H]3[C@]4(C)C[C@H](O)[C@@]2(F)[C@H]3CCC1=CC(=O)C=C[C@@]12C
NCGC00023212-07	Stavudine	TERT	Reverse Transcriptase Inhibitor	s-ewing-osteo-TC71-1	activity	1.3	4	-8.31797	1.2221	117.563	104.063	107.915	11	573.771	519.379	0.587313	0.209459	106.063	112.649	112.178	116.533	119.823	121.693	119.603	114.243	120.033	111.601	107.915	0.00156083	0.00468253	0.0140476	0.0421426	0.126428	0.379284	1.13785	3.41355	10.2407	30.722	92.1659	Stavudine	TERT	Reverse Transcriptase Inhibitor	CC1=CN(C(=O)NC1=O)[C@H]2C=C[C@@H](CO)O2
NCGC00023373-04	Clobetasol propionate	NA	Corticosteroid	s-ewing-osteo-TC71-1	activity	2.3	4	-4.42921	4.95492	95.5337	114.626	99.7157	11	546.969	546.688	0.601539	0.168728	110.626	118.457	107.25	112.317	114.082	113.299	115.462	119.057	115.067	118.239	99.7157	0.000780415	0.00234124	0.00702378	0.0210713	0.0632139	0.189642	0.568925	1.70678	5.12033	15.361	46.0829	Clobetasol propionate	NA	Corticosteroid	CCC(=O)O[C@@]1([C@@H](C)C[C@H]2[C@@H]3CCC/4=C/C(=O)/C=C\[C@]4(C)[C@@]3(F)[C@@H](O)C[C@]12C)C(=O)CCl
NCGC00023509-14	Lovastatin	HMGCR	HMG-CoA Reductase Inhibitor	s-ewing-osteo-TC71-1	activity	4	-2.1	-4.82921	1.34372	9.716	129.772	29.8132	11	552.445	551.771	0.987324	1.6514e-06	130.299	134.576	127.64	125.95	130.103	135.325	121.436	121.207	109.261	68.6912	29.8132	0.000780415	0.00234124	0.00702378	0.0210713	0.0632139	0.189642	0.568925	1.70678	5.12033	15.361	46.0829	Lovastatin	HMGCR	HMG-CoA Reductase Inhibitor	CC[C@H](C)C(=O)O[C@H]1C[C@@H](C)\C=C2\C=C/[C@H](C)[C@H](CC[C@@H]3C[C@@H](O)CC(=O)O3)[C@@H]12
NCGC00023673-08	Adenosine	ADORA1	Adenosine Receptor Agonist; Anti-Herpes Simplex Virus Drug	s-ewing-osteo-TC71-1	activity	1.1	-1.1	-5.17921	1	45.0543	136.053	55.5042	11	568.716	569.927	0.961592	0.000116261	130.553	136.426	146.699	138.695	135.435	129.817	121.7	115.577	105.763	67.25	55.5042	0.000780415	0.00234124	0.00702378	0.0210713	0.0632139	0.189642	0.568925	1.70678	5.12033	15.361	46.0829	Adenosine	ADORA1	Adenosine Receptor Agonist; Anti-Herpes Simplex Virus Drug	NC1=NC=NC2=C1N=C[N]2[C@@H]3O[C@H](CO)[C@@H](O)[C@H]3O
NCGC00023722-07	Floxuridine	NA	Pyrimidine Antagonists	s-ewing-osteo-TC71-1	activity	4	-1.1	-7.02921	1.21	20.4696	133.817	29.5233	11	334.098	330.209	0.985885	2.5125e-06	138.714	130.515	130.854	106.727	98.783	50.9741	32.1028	22.7161	16.3078	16.796	29.5233	0.000780415	0.00234124	0.00702378	0.0210713	0.0632139	0.189642	0.568925	1.70678	5.12033	15.361	46.0829	Floxuridine	NA	Pyrimidine Antagonists	OC[C@H]1O[C@H](C[C@@H]1O)N2\C=C(F)/C(=O)NC2=O
NCGC00023945-13	Zidovudine	TERT	Reverse Transcriptase Inhibitor	s-ewing-osteo-TC71-1	activity	1.3	4	-8.17921	1.78849	127.511	111.511	122.886	11	597.938	598.405	0.721706	0.074374	112.511	113.126	120.979	123.567	129.236	135.767	126.604	128.573	127.297	122.226	122.886	0.000780415	0.00234124	0.00702378	0.0210713	0.0632139	0.189642	0.568925	1.70678	5.12033	15.361	46.0829	Zidovudine	TERT	Reverse Transcriptase Inhibitor	C\C1=C\N([C@H]2C[C@H](N=[N+]=[N-])[C@@H](CO)O2)C(=O)NC1=O
NCGC00024196-06	Megestrol acetate	PGR	Progesterone Receptor Antagonist	s-ewing-osteo-TC71-1	activity	4	-1.1	-5.37921	2.24812	2.71892	120.715	4.34807	11	452.794	453.917	0.994378	6.72e-08	120.715	112.763	122.711	121.721	118.968	127.071	122.226	105.787	50.0234	7.24056	4.34807	0.000780415	0.00234124	0.00702378	0.0210713	0.0632139	0.189642	0.568925	1.70678	5.12033	15.361	46.0829	Megestrol acetate	PGR	Progesterone Receptor Antagonist	CC(=O)O[C@@]1(CC[C@H]2[C@@H]3\C=C(C)/C4=C/C(=O)CC[C@]4(C)[C@H]3CC[C@]12C)C(C)=O
NCGC00024246-13	Daunorubicin	NA	Antineoplastic Antibiotics	s-ewing-osteo-TC71-1	activity	4	-1.1	-7.17921	1.96734	4.95975	120.68	4.50957	11	247.016	247.744	0.996046	1.66e-08	117.056	122.802	125.31	103.704	68.3703	13.9596	6.07302	6.15012	6.20632	5.55386	4.50957	0.000780415	0.00234124	0.00702378	0.0210713	0.0632139	0.189642	0.568925	1.70678	5.12033	15.361	46.0829	Daunorubicin	NA	Antineoplastic Antibiotics	COC1=CC=CC2=C1C(=O)C3=C(O)C4=C(C[C@](O)(C[C@@H]4O[C@H]5C[C@H](N)[C@H](O)[C@H](C)O5)C(C)=O)C(=C3C2=O)O
NCGC00024257-07	Phenylephrine hydrochloride	ADRA1A	alpha1-Adrenoceptor Agonists	s-ewing-osteo-TC71-1	activity	1.3	4	-6.52921	4.95492	114.363	103.193	115.484	11	520.723	519.407	0.831644	0.0187074	107.363	98.0546	101.697	105.84	103.608	102.838	116.705	113.769	113.494	112.622	115.484	0.000780415	0.00234124	0.00702378	0.0210713	0.0632139	0.189642	0.568925	1.70678	5.12033	15.361	46.0829	Phenylephrine hydrochloride	ADRA1A	alpha1-Adrenoceptor Agonists	CNC[C@H](O)C1=CC=CC(=C1)O
NCGC00024359-06	Penicillamine	NA	Copper Chelator	s-ewing-osteo-TC71-1	activity	1.3	4	-8.37921	4.95492	132.495	122.609	120.961	11	629.699	628.815	0.577646	0.217979	124.995	120.507	133.234	130.567	128.029	128.139	136.91	137.58	134.279	130.978	120.961	0.000780415	0.00234124	0.00702378	0.0210713	0.0632139	0.189642	0.568925	1.70678	5.12033	15.361	46.0829	Penicillamine	NA	Copper Chelator	CC(C)(S)[C@@H](N)C(O)=O
NCGC00024379-04	Emetine	NA	antiprotozoal agent	s-ewing-osteo-TC71-1	activity	4	-1.1	-7.22921	1.75295	6.71933	129.291	4.42701	11	262.559	264.583	0.993347	1.308e-07	126.831	125.409	127.023	120.125	58.318	28.1137	13.708	6.78571	5.0814	4.01742	4.42701	0.000780415	0.00234124	0.00702378	0.0210713	0.0632139	0.189642	0.568925	1.70678	5.12033	15.361	46.0829	Emetine	NA	antiprotozoal agent	COc4cc5CCN[C@H](C[C@H]1C[C@H]2c3cc(OC)c(OC)cc3CCN2C[C@@H]1CC)c5cc4OC
NCGC00024415-39	Doxorubicin (Adriamycin)	TOP2A	DNA Topoisomerase II Inhibitors	s-ewing-osteo-TC71-1	activity	4	-1.1	-7.12921	1.82648	5.96967	143.792	2.70233	11	301.398	298.864	0.986917	1.8681e-06	151.218	127.872	143.062	136.734	89.1329	16.2381	16.9929	9.5701	5.09258	4.53505	2.70233	0.000780415	0.00234124	0.00702378	0.0210713	0.0632139	0.189642	0.568925	1.70678	5.12033	15.361	46.0829	Doxorubicin (Adriamycin)	TOP2A	DNA Topoisomerase II Inhibitors	COC1=CC=CC2=C1C(=O)C3=C(O)C4=C(C[C@](O)(C[C@@H]4O[C@H]5C[C@H](N)[C@H](O)[C@H](C)O5)C(=O)CO)C(=C3C2=O)O
NCGC00024427-03	Naltrexone hydrochloride	OPRM1	opiod receptor antagonist	s-ewing-osteo-TC71-1	activity	5	4	NA	NA	NA	NA	120.439	11	NA	610.817	NA	NA	133.329	125.12	124.526	127.87	130.089	124.092	126.602	134.226	128.002	123.858	120.439	0.000780415	0.00234124	0.00702378	0.0210713	0.0632139	0.189642	0.568925	1.70678	5.12033	15.361	46.0829	Naltrexone hydrochloride	OPRM1	opiod receptor antagonist	OC1=CC=C2C[C@H]3N(CC[C@@]45[C@@H](OC1=C24)C(=O)CC[C@@]35O)CC6CC6
NCGC00024547-06	nor-Binaltorphimine	NA	Opioid receptor antagonist	s-ewing-osteo-TC71-1	activity	1.3	4	-7.92921	4.95492	127.836	121.524	120.242	11	606.99	607.634	0.471726	0.314576	125.836	120.875	117.66	131.823	126.398	123.657	129.729	125.918	127.555	131.497	120.242	0.000780415	0.00234124	0.00702378	0.0210713	0.0632139	0.189642	0.568925	1.70678	5.12033	15.361	46.0829	nor-Binaltorphimine	NA	Opioid receptor antagonist	OC1=C2O[C@H]3C4=C(C[C@@]5(O)[C@H]6CC(=C2[C@@]35CCN6CC7CC7)C=C1)C8=C([NH]4)[C@@H]9OC%10=C%11C(=CC=C%10O)C[C@H]%12N(CC[C@@]9%11[C@@]%12(O)C8)CC%13CC%13
NCGC00024563-02	Azasetron	HTR3A	5-HT3 Antagonists	s-ewing-osteo-TC71-1	activity	2.3	4	-4.47921	0.4	94.7069	128.124	104.276	11	587.974	586.21	0.489799	0.268647	132.124	116.382	127.656	125.968	130.202	121.834	125.389	114.881	116.939	123.444	104.276	0.000780415	0.00234124	0.00702378	0.0210713	0.0632139	0.189642	0.568925	1.70678	5.12033	15.361	46.0829	Azasetron	HTR3A	5-HT3 Antagonists	Clc1cc(c2OCC(=O)N(C)c2c1)C(=O)NC4CN3CCC4CC3
NCGC00024594-01	Calpeptin	PSMD1	Proteasome Inhibitor	s-ewing-osteo-TC71-1	activity	2.3	4	-4.67921	0.7	83.0266	120.355	90.998	11	554.094	554.197	0.628155	0.145262	120.855	118.38	120.408	121.638	122.13	116.147	124.549	99.5635	115.804	110.24	90.998	0.000780415	0.00234124	0.00702378	0.0210713	0.0632139	0.189642	0.568925	1.70678	5.12033	15.361	46.0829	Calpeptin	PSMD1	Proteasome Inhibitor	CCCCC(NC(=O)C(CC(C)C)NC(=O)OCC1=CC=CC=C1)C=O
NCGC00024631-01	EBPC	AKR1B1	Aldose Reductase Inhibitor	s-ewing-osteo-TC71-1	activity	2.3	4	-4.67921	1.41632	115.792	138.961	119.821	11	657.101	659.085	0.394653	0.353986	129.961	135.628	143.516	127.524	139.326	148.526	146.437	143.441	129.096	134.095	119.821	0.000780415	0.00234124	0.00702378	0.0210713	0.0632139	0.189642	0.568925	1.70678	5.12033	15.361	46.0829	EBPC	AKR1B1	Aldose Reductase Inhibitor	CCOC(=O)C/1=C(O)/C(=O)N(CC2=CC=CC=C2)C1
NCGC00024667-13	Methyldopa	DDC	DOPA decarboxylase inhibitor	s-ewing-osteo-TC71-1	activity	5	4	NA	NA	NA	NA	111.938	11	NA	576.539	NA	NA	122.916	114.681	125.548	121.322	118.327	121.682	120.376	117.769	122.192	120.734	111.938	0.000780415	0.00234124	0.00702378	0.0210713	0.0632139	0.189642	0.568925	1.70678	5.12033	15.361	46.0829	Methyldopa	DDC	DOPA decarboxylase inhibitor	C[C@](N)(CC1=CC(=C(O)C=C1)O)C(O)=O
NCGC00024717-01	L-NAME	NOS3	Nitric Oxide Synthase Inhibitors	s-ewing-osteo-TC71-1	activity	1.3	1.4	-7.82921	4.95492	116.018	96.5082	122.389	11	533.222	531.91	0.782516	0.0388474	97.0185	98.2924	95.3433	113.439	109.585	111.111	120.438	108.898	121.411	117.52	122.389	0.000780415	0.00234124	0.00702378	0.0210713	0.0632139	0.189642	0.568925	1.70678	5.12033	15.361	46.0829	L-NAME	NOS3	Nitric Oxide Synthase Inhibitors	COC(=O)[C@@H](N)CCCNC(=N)N[N+]([O-])=O
NCGC00024728-01	L-690330	INPPL1	inositol monophophatase inhibitor	s-ewing-osteo-TC71-1	activity	1.3	4	-5.52921	0.4	98.2908	133.368	108.93	11	588.617	587.734	0.705663	0.0850945	134.368	132.398	132.089	124.798	125.305	116.39	127.495	129.723	109.593	104.304	108.93	0.000780415	0.00234124	0.00702378	0.0210713	0.0632139	0.189642	0.568925	1.70678	5.12033	15.361	46.0829	L-690330	INPPL1	inositol monophophatase inhibitor	CC(OC1=CC=C(O)C=C1)([P](O)(O)=O)[P](O)(O)=O
NCGC00024762-05	Tesmilifene hydrochloride	ESR1	Estrogen Receptor Antagonist	s-ewing-osteo-TC71-1	activity	2.1	-3	-4.52921	4.50447	45.9343	122.805	55.0917	11	569.892	570.998	0.944196	0.000460202	119.646	120.114	125.35	131.911	131.128	118.389	120.009	116.409	123.636	118.351	55.0917	0.000780415	0.00234124	0.00702378	0.0210713	0.0632139	0.189642	0.568925	1.70678	5.12033	15.361	46.0829	Tesmilifene hydrochloride	ESR1	Estrogen Receptor Antagonist	CCN(CC)CCOC1=CC=C(CC2=CC=CC=C2)C=C1
NCGC00024868-08	Bisoprolol	ADRB1	beta1-Adrenoceptor Antagonists	s-ewing-osteo-TC71-1	activity	1.3	4	-6.07921	4.95492	118.316	124.527	128.94	11	587.656	588.83	0.430304	0.351148	125.027	126.356	125.507	123.859	125.75	120.149	125.251	111.517	122.424	121.202	128.94	0.000780415	0.00234124	0.00702378	0.0210713	0.0632139	0.189642	0.568925	1.70678	5.12033	15.361	46.0829	Bisoprolol	ADRB1	beta1-Adrenoceptor Antagonists	CC(C)NCC(O)COC1=CC=C(COCCOC(C)C)C=C1
NCGC00024901-03	BD-1047	SIGMAR1	sigma Receptor Antagonist	s-ewing-osteo-TC71-1	activity	5	4	NA	NA	NA	NA	108.732	11	NA	593.825	NA	NA	128.092	118.546	121.562	121.222	125.339	132.861	126.564	123.173	124.578	124.268	108.732	0.000780415	0.00234124	0.00702378	0.0210713	0.0632139	0.189642	0.568925	1.70678	5.12033	15.361	46.0829	BD-1047	SIGMAR1	sigma Receptor Antagonist	CN(C)CCN(C)CCC1=CC=C(Cl)C(=C1)Cl
NCGC00024928-22	Tamoxifen	ER	Selective Estrogen Receptor Modulators (SERM)	s-ewing-osteo-TC71-1	activity	2.1	-2.2	-4.77921	1.75295	66.167	133.076	74.4866	11	604.817	604.163	0.942546	0.000511436	133.912	121.31	134.553	135.477	130.834	134.812	135.426	137.842	122.434	103.847	74.4866	0.000780415	0.00234124	0.00702378	0.0210713	0.0632139	0.189642	0.568925	1.70678	5.12033	15.361	46.0829	Tamoxifen	ER	Selective Estrogen Receptor Modulators (SERM)	CCC(/C1=CC=CC=C1)=C(C2=CC=CC=C2)/C3=CC=C(OCCN(C)C)C=C3
NCGC00024929-01	ICI-D7288	HCN	HCN [I(h)] Blockers	s-ewing-osteo-TC71-1	activity	1.3	4	-5.47921	4.95492	118.986	134.821	118.792	11	629.106	629.971	0.690117	0.0963905	130.321	130.268	134.432	143.366	128.066	140.531	132.043	138.045	119.815	120.415	118.792	0.000780415	0.00234124	0.00702378	0.0210713	0.0632139	0.189642	0.568925	1.70678	5.12033	15.361	46.0829	ICI-D7288	HCN	HCN [I(h)] Blockers	CCN(C1=CC=CC=C1)C2=CC(=[N+](C)C(=N2)C)NC
NCGC00024956-02	PD-153035	EGFR	EGFR (HER1; erbB1) Inhibitor	s-ewing-osteo-TC71-1	activity	4	-1.1	-6.22921	1.21	13.0309	123.184	15.0134	11	379.511	381.607	0.972448	3.31878e-05	114.026	124.725	123.3	124.393	126.489	86.4765	82.0009	29.9043	24.877	12.0107	15.0134	0.000780415	0.00234124	0.00702378	0.0210713	0.0632139	0.189642	0.568925	1.70678	5.12033	15.361	46.0829	PD-153035	EGFR	EGFR (HER1; erbB1) Inhibitor	COC1=CC2=NC=NC(=C2C=C1OC)NC3=CC=CC(=C3)Br
NCGC00024976-04	CGS-21680	ADORA2	Adenosine A2 Antagonist	s-ewing-osteo-TC71-1	activity	1.3	4	-5.52921	1.1	110.952	124.313	111.429	11	580.862	580.181	0.593619	0.175395	123.813	114.87	129.242	126.029	128.618	119.929	124.975	117.085	117.613	111.746	111.429	0.000780415	0.00234124	0.00702378	0.0210713	0.0632139	0.189642	0.568925	1.70678	5.12033	15.361	46.0829	CGS-21680	ADORA2	Adenosine A2 Antagonist	CCNC(=O)[C@H]1O[C@H]([C@H](O)[C@@H]1O)[N]2C=NC3=C2N=C(NCCC4=CC=C(CCC(O)=O)C=C4)N=C3N
NCGC00024994-01	Selegiline hydrochloride	MAOB	MAO-B Inhibitor	s-ewing-osteo-TC71-1	activity	2.3	4	-4.57921	4.09497	106.211	122.854	107.735	11	585.579	585.667	0.653619	0.125032	117.854	118.248	126.481	126.112	123.345	128.015	121.398	121.039	120.969	121.099	107.735	0.000780415	0.00234124	0.00702378	0.0210713	0.0632139	0.189642	0.568925	1.70678	5.12033	15.361	46.0829	Selegiline hydrochloride	MAOB	MAO-B Inhibitor	C[C@H](CC1=CC=CC=C1)N(C)CC#C
NCGC00024995-10	Paclitaxel	TUBB	Tubulin depolymerization inhibitor	s-ewing-osteo-TC71-1	activity	4	-1.2	-8.47921	1.24751	19.5044	78.429	13.6875	11	134.291	135.07	0.958307	0.000157935	72.8448	51.1091	38.6136	25.172	20.1977	21.1117	18.0835	16.7808	20.7416	27.0008	13.6875	0.000780415	0.00234124	0.00702378	0.0210713	0.0632139	0.189642	0.568925	1.70678	5.12033	15.361	46.0829	Paclitaxel	TUBB	Tubulin depolymerization inhibitor	CC(=O)O[C@H]1C(=O)[C@]2(C)[C@@H](O)C[C@H]3OC[C@@]3(OC(C)=O)C2[C@H](OC(=O)C4=CC=CC=C4)[C@]5(O)C[C@H](OC(=O)[C@H](O)[C@@H](NC(=O)C6=CC=CC=C6)C7=CC=CC=C7)\C(=C1/C5(C)C)C
NCGC00024999-02	Procaterol	ADRB2	beta2-Adrenoceptor Agonists	s-ewing-osteo-TC71-1	activity	2.3	4	-4.67921	4.09497	105.486	124.288	106.203	11	590.454	589.783	0.83052	0.0190999	124.788	122.181	122.089	122.86	127.732	129.817	122.844	122.423	123.096	119.703	106.203	0.000780415	0.00234124	0.00702378	0.0210713	0.0632139	0.189642	0.568925	1.70678	5.12033	15.361	46.0829	Procaterol	ADRB2	beta2-Adrenoceptor Agonists	CC(C)N[C@@H](CC)[C@H](O)c2ccc(O)c1NC(=O)C=Cc12
NCGC00025000-08	Ketoconazole	CYP19A1	Aromatase Inhibitor	s-ewing-osteo-TC71-1	activity	2.1	-2.2	-4.67921	4.09497	43.0421	124.921	49.2667	11	570.159	570.262	0.972577	3.26153e-05	123.406	128.39	124.4	122.271	123.082	121.384	134.118	124.267	120.843	106.463	49.2667	0.000780415	0.00234124	0.00702378	0.0210713	0.0632139	0.189642	0.568925	1.70678	5.12033	15.361	46.0829	Ketoconazole	CYP19A1	Aromatase Inhibitor	CC(=O)N1CCN(CC1)C2=CC=C(OC[C@H]3CO[C@@](C[N]4C=CN=C4)(O3)C5=CC=C(Cl)C=C5Cl)C=C2
NCGC00025012-02	AM-630	CNR2	cannabinoid CB2 antagonist	s-ewing-osteo-TC71-1	activity	2.1	-3	-4.47921	4.95492	58.0333	122.537	68.6784	11	573.549	575.766	0.913971	0.0021262	111.445	117.052	120.194	121.491	123.477	124.979	124.083	129.597	127.07	123.644	68.6784	0.000780415	0.00234124	0.00702378	0.0210713	0.0632139	0.189642	0.568925	1.70678	5.12033	15.361	46.0829	AM-630	CNR2	cannabinoid CB2 antagonist	COC1=CC=C(C=C1)C(=O)C2=C(C)[N](CCN3CCOCC3)C4=C2C=CC(=C4)I
NCGC00025018-09	Yohimbine	ADRA2A	alpha2-Adrenoceptor Antagonists	s-ewing-osteo-TC71-1	activity	1.3	4	-7.97921	4.95492	118.13	107.13	114.683	11	555.163	557	0.584727	0.183157	104.63	109.743	107.664	120.848	117.239	116.767	116.121	112.492	128.578	119.794	114.683	0.000780415	0.00234124	0.00702378	0.0210713	0.0632139	0.189642	0.568925	1.70678	5.12033	15.361	46.0829	Yohimbine	ADRA2A	alpha2-Adrenoceptor Antagonists	COC(=O)[C@H]1[C@@H](O)CC[C@H]2CN3CCC4=C([NH]C5=C4C=CC=C5)[C@@H]3C[C@H]12
NCGC00025029-05	U-0126	MAP2K1	Mek 1/2 inhibitor	s-ewing-osteo-TC71-1	activity	2.1	-3	-4.47921	4.95492	50.0183	122.806	62.0048	11	572.861	574.313	0.963596	9.52011e-05	114.306	127.267	125.626	125.83	119.551	124.77	123.189	122.056	121.583	121.071	62.0048	0.000780415	0.00234124	0.00702378	0.0210713	0.0632139	0.189642	0.568925	1.70678	5.12033	15.361	46.0829	U-0126	MAP2K1	Mek 1/2 inhibitor	NC(/SC1=CC=CC=C1N)=C(C#N)\C(C#N)=C(N)\SC2=CC=CC=C2N
NCGC00025035-05	SB-203580	MAPK14	p38 MAPK Inhibitor	s-ewing-osteo-TC71-1	activity	2.1	-2.2	-4.41797	1.47809	47.1783	109.728	57.0736	11	515.728	514.806	0.930186	0.00102648	106.55	109.667	113.185	108.48	103.709	111.465	113.502	113.481	93.5622	86.9389	57.0736	0.00156083	0.00468253	0.0140476	0.0421426	0.126428	0.379284	1.13785	3.41355	10.2407	30.722	92.1659	SB-203580	MAPK14	p38 MAPK Inhibitor	C[S+]([O-])C1=CC=C(C=C1)C2=NC(=C([NH]2)C3=CC=NC=C3)C4=CC=C(F)C=C4
NCGC00025059-04	Actinomycin D	PRKDC	DNA-Directed RNA Polymerase Inhibitor	s-ewing-osteo-TC71-1	activity	4	4	NA	NA	NA	NA	-0.14868	11	NA	11.7316	NA	NA	5.21807	4.86627	4.38684	3.40021	3.34638	3.25152	1.83892	0.536078	0.174768	0.263709	-0.14868	0.000780415	0.00234124	0.00702378	0.0210713	0.0632139	0.189642	0.568925	1.70678	5.12033	15.361	46.0829	Actinomycin D	PRKDC	DNA-Directed RNA Polymerase Inhibitor	CC(C)C1NC(=O)C(NC(=O)C2=C3\N=C\4/C(=C(C)\C(=O)\C(=C4C(=O)NC5C(C)OC(=O)C(C(C)C)N(C)C(=O)CN(C)C(=O)C6CCCN6C(=O)C(NC5=O)C(C)C)N)OC3=C(C)C=C2)C(C)OC(=O)C(C(C)C)N(C)C(=O)CN(C)C(=O)C7CCCN7C1=O
NCGC00025060-16	Methotrexate	DHFR	Dihydrofolate Reductase (DHFR) Inhibitors	s-ewing-osteo-TC71-1	activity	4	-1.1	-7.82921	3.1925	19.8592	131.3	2.51825	11	237.315	241.663	0.965476	7.79372e-05	130.025	127.887	125.637	48.2345	33.3514	29.11	26.5125	25.5328	19.0602	4.71757	2.51825	0.000780415	0.00234124	0.00702378	0.0210713	0.0632139	0.189642	0.568925	1.70678	5.12033	15.361	46.0829	Methotrexate	DHFR	Dihydrofolate Reductase (DHFR) Inhibitors	CN(CC1=NC2=C(N)N=C(N)N=C2N=C1)C3=CC=C(C=C3)C(=O)N[C@@H](CCC(O)=O)C(O)=O
NCGC00025072-01	PD-128907	DRD2	Dopamine D2/D3 Agonist	s-ewing-osteo-TC71-1	activity	1.3	4	-5.57921	4.95492	106.33	121.565	101.369	11	565.108	566.044	0.676293	0.106753	121.565	115.489	116.746	124.258	121.086	119.625	131.133	120.811	105.674	112.556	101.369	0.000780415	0.00234124	0.00702378	0.0210713	0.0632139	0.189642	0.568925	1.70678	5.12033	15.361	46.0829	PD-128907	DRD2	Dopamine D2/D3 Agonist	CCCN1CCO[C@H]2[C@H]1COC3=CC=C(O)C=C23
NCGC00025091-04	U-73122??	PLCG1	Phospholipase C Inhibitor	s-ewing-osteo-TC71-1	activity	2.3	-2.2	-4.77921	0.8	92.057	136.545	103.448	11	626.364	626.209	0.860935	0.010365	139.045	138.346	129.917	138.386	131.911	139.625	136.845	130.262	117.526	120.727	103.448	0.000780415	0.00234124	0.00702378	0.0210713	0.0632139	0.189642	0.568925	1.70678	5.12033	15.361	46.0829	U-73122??	PLCG1	Phospholipase C Inhibitor	COC1=CC=C2[C@H]3CC[C@]4(C)[C@H](CC[C@H]4[C@@H]3CCC2=C1)NCCCCCCN5C(=O)\C=C/C5=O
NCGC00025092-02	GR-159897	TACR2	Tachykinin NK2 Antagonist	s-ewing-osteo-TC71-1	activity	1.3	-1.2	-5.22921	1.24751	93.6591	130.415	96.0189	11	591.755	590.804	0.891925	0.00459397	130.439	127.621	127.749	128.381	141.26	124.127	131.451	120.846	114.483	101.989	96.0189	0.000780415	0.00234124	0.00702378	0.0210713	0.0632139	0.189642	0.568925	1.70678	5.12033	15.361	46.0829	GR-159897	TACR2	Tachykinin NK2 Antagonist	COC1(CCN(CCC2=C[NH]C3=CC=C(F)C=C23)CC1)C[S+]([O-])C4=CC=CC=C4
NCGC00025100-09	LFM-A13	BTK	BTK Inhibitor	s-ewing-osteo-TC71-1	activity	4	-2.1	-4.62921	4.09497	1.89583	119.488	11.5303	11	535.536	536.389	0.92582	0.00126977	123.559	127.773	126.066	127.848	125.994	115.47	111.769	121.405	96.5264	102.966	11.5303	0.000780415	0.00234124	0.00702378	0.0210713	0.0632139	0.189642	0.568925	1.70678	5.12033	15.361	46.0829	LFM-A13	BTK	BTK Inhibitor	CC(/O)=C(C#N)/C(=O)NC1=C(Br)C=CC(=C1)Br
NCGC00025103-01	Monastrol	KIF11	Kinesin-Like Spindle Protein Inhibitor	s-ewing-osteo-TC71-1	activity	4	-1.1	-6.97921	4.04497	27.6901	124.519	26.8564	11	339.558	340.194	0.997928	1.3e-09	120.882	123.877	128.331	123.937	114.791	37.463	29.9416	26.7997	27.5978	24.4101	26.8564	0.000780415	0.00234124	0.00702378	0.0210713	0.0632139	0.189642	0.568925	1.70678	5.12033	15.361	46.0829	Monastrol	KIF11	Kinesin-Like Spindle Protein Inhibitor	CCOC(=O)C/1=C(C)/NC(=S)NC1C2=CC=CC(=C2)O
NCGC00025109-01	ZM-336372	BRAF	Raf Kinase Inhibitors	s-ewing-osteo-TC71-1	activity	4	-1.1	-6.27921	1.88512	4.15059	137.818	6.40541	11	398.005	396.511	0.991517	3.412e-07	137.132	142.693	129.208	143.164	132.418	118.145	74.3561	6.65722	5.98663	6.17643	6.40541	0.000780415	0.00234124	0.00702378	0.0210713	0.0632139	0.189642	0.568925	1.70678	5.12033	15.361	46.0829	ZM-336372	BRAF	Raf Kinase Inhibitors	CN(C)C1=CC=CC(=C1)C(=O)NC2=CC(=C(C)C=C2)NC(=O)C3=CC=C(O)C=C3
NCGC00025125-20	Colchicine	TUBB	Tubulin polymerization inhibitor	s-ewing-osteo-TC71-1	activity	4	4	-5.27921	2.40638	25.4389	34.6704	25.6442	11	157.608	158.05	0.847139	0.0141424	34.1704	33.455	31.8408	37.4355	33.9778	36.6566	35.9638	33.7515	30.2878	26.0775	25.6442	0.000780415	0.00234124	0.00702378	0.0210713	0.0632139	0.189642	0.568925	1.70678	5.12033	15.361	46.0829	Colchicine	TUBB	Tubulin polymerization inhibitor	COC/1=C/C=C2\C(=C/C1=O)[C@H](CCC3=CC(=C(OC)C(=C23)OC)OC)NC(C)=O
NCGC00025155-01	Omacetaxine mepesuccinate	NA	Alkaloid	s-ewing-osteo-TC71-1	activity	5	4	NA	NA	NA	NA	110.453	11	NA	575.1	NA	NA	128.981	111.297	117.309	121.838	133.099	114.502	131.563	114.665	120.336	112.825	110.453	0.000780415	0.00234124	0.00702378	0.0210713	0.0632139	0.189642	0.568925	1.70678	5.12033	15.361	46.0829	Omacetaxine mepesuccinate	NA	Alkaloid	O=C(OC)C[C@](O)(CCCC(C)(C)O)C(=O)O[C@@H]2C(OC)=CC53CCCN5CCc1cc4OCOc4cc1[C@H]23
NCGC00025176-01	Etomidate	GABRA1	GABAA Receptor Modulator	s-ewing-osteo-TC71-1	activity	1.3	4	-6.42921	0.8	129.799	148.157	127.775	11	672.936	674.892	0.760406	0.0505141	142.657	151.763	148.999	147.647	144.618	137.86	142.391	127.934	138.318	130.273	127.775	0.000780415	0.00234124	0.00702378	0.0210713	0.0632139	0.189642	0.568925	1.70678	5.12033	15.361	46.0829	Etomidate	GABRA1	GABAA Receptor Modulator	CCOC(=O)C1=CN=C[N]1[C@H](C)C2=CC=CC=C2
NCGC00025179-13	Mifepristone	PGR	Progesterone Receptor Antagonist	s-ewing-osteo-TC71-1	activity	4	-1.1	-6.57921	3.1925	5.21862	102.173	4.85579	11	270.797	272.859	0.996284	1.3e-08	95.5619	104.537	99.0355	106.568	102.563	78.763	14.2731	5.05795	5.30781	5.20987	4.85579	0.000780415	0.00234124	0.00702378	0.0210713	0.0632139	0.189642	0.568925	1.70678	5.12033	15.361	46.0829	Mifepristone	PGR	Progesterone Receptor Antagonist	CC#C[C@]1(O)CC[C@H]2[C@@H]/3CCC/4=C/C(=O)CCC4=C3[C@H](C[C@]12C)C5=CC=C(C=C5)N(C)C
NCGC00025195-01	Ozagrel hydrochloride	TBXA2R	Thromboxane Synthase Inhibitor	s-ewing-osteo-TC71-1	activity	5	4	NA	NA	NA	NA	121.343	11	NA	587.746	NA	NA	115.651	124.134	123.298	126.725	116.628	120.301	130.736	127.378	121.5	113.651	121.343	0.000780415	0.00234124	0.00702378	0.0210713	0.0632139	0.189642	0.568925	1.70678	5.12033	15.361	46.0829	Ozagrel hydrochloride	TBXA2R	Thromboxane Synthase Inhibitor	OC(=O)/C=C/C1=CC=C(C[N]2C=CN=C2)C=C1
NCGC00025207-06	HA-14-1	BCL2	Bcl-2 Inhibitor	s-ewing-osteo-TC71-1	activity	4	-2.1	-4.62921	4.09497	-9.09143	128.355	2.31819	11	571.603	572.05	0.980988	7.9897e-06	134.988	131.481	132.841	132.206	134.102	126.237	128.545	119.045	121.199	104.48	2.31819	0.000780415	0.00234124	0.00702378	0.0210713	0.0632139	0.189642	0.568925	1.70678	5.12033	15.361	46.0829	HA-14-1	BCL2	Bcl-2 Inhibitor	CCOC(=O)C(C#N)C\1C2=CC(=CC=C2O\C(=C1C(=O)OCC)N)Br
NCGC00025219-04	Purvalanol A	CDK1	CDK1/2/3/4/5 inhibitor	s-ewing-osteo-TC71-1	activity	4	-2.1	-5.12921	0.7	-17.4696	126.108	0.477604	11	465.864	464.708	0.973489	2.8656e-05	128.672	121.915	123.944	127.409	122.42	115.853	104.552	78.6427	66.4206	48.2153	0.477604	0.000780415	0.00234124	0.00702378	0.0210713	0.0632139	0.189642	0.568925	1.70678	5.12033	15.361	46.0829	Purvalanol A	CDK1	CDK1/2/3/4/5 inhibitor	CC(C)[C@H](CO)NC1=NC(=C2N=C[N](C(C)C)C2=N1)NC3=CC(=CC=C3)Cl
NCGC00025220-03	Purvalanol B	CDK1	CDK1/2/3/4/5 inhibitor	s-ewing-osteo-TC71-1	activity	4	-2.3	-6.42921	0.3	36.5079	140.241	23.6902	11	444.132	450.692	0.684046	0.100586	127.059	133.542	121.668	93.8779	86.9878	86.7086	89.1571	85.9904	78.584	90.9572	23.6902	0.000780415	0.00234124	0.00702378	0.0210713	0.0632139	0.189642	0.568925	1.70678	5.12033	15.361	46.0829	Purvalanol B	CDK1	CDK1/2/3/4/5 inhibitor	CC(C)[C@H](CO)NC1=NC(=C2N=C[N](C(C)C)C2=N1)NC3=CC(=C(C=C3)C(O)=O)Cl
NCGC00025225-02	SCH-79797	PAR1	PAR1 Antagonist	s-ewing-osteo-TC71-1	activity	4	-1.1	-5.97921	2.53343	19.6801	119.258	1.93982	11	406.059	411.143	0.963005	0.000101023	112.817	110.231	121.002	130.771	112.82	127.203	102.156	42.1312	29.8734	28.0059	1.93982	0.000780415	0.00234124	0.00702378	0.0210713	0.0632139	0.189642	0.568925	1.70678	5.12033	15.361	46.0829	SCH-79797	PAR1	PAR1 Antagonist	CC(C)C1=CC=C(C[N]2C=CC3=C4C(=NC(=NC4=CC=C23)NC5CC5)N)C=C1
NCGC00025230-01	SB-431542	NA	TGF-bR1 (ALK5) Inhibitor	s-ewing-osteo-TC71-1	activity	1.1	-2.2	-4.82921	0.8	75.4833	142.569	90.6511	11	637.719	638.837	0.905535	0.00292522	136.569	147.26	150.493	139.407	142.33	133.887	136.942	137.12	116.513	114.646	90.6511	0.000780415	0.00234124	0.00702378	0.0210713	0.0632139	0.189642	0.568925	1.70678	5.12033	15.361	46.0829	SB-431542	NA	TGF-bR1 (ALK5) Inhibitor	NC(=O)C1=CC=C(C=C1)C2=NC(=C([NH]2)C3=NC=CC=C3)C4=CC5=C(OCO5)C=C4
NCGC00025234-01	Alprostadil	NA	prostaglandin	s-ewing-osteo-TC71-1	activity	1.1	-2.4	-5.82921	2.40638	115.797	136.888	117.25	11	625.72	625.918	0.93458	0.000816975	138.388	137.376	133.667	139.811	133.202	141.454	133.322	125.42	115.395	115.689	117.25	0.000780415	0.00234124	0.00702378	0.0210713	0.0632139	0.189642	0.568925	1.70678	5.12033	15.361	46.0829	Alprostadil	NA	prostaglandin	CCCCC[C@H](O)\C=C\[C@H]1[C@H](O)CC(=O)[C@@H]1CCCCCCC(O)=O
NCGC00025235-01	Streptozocin	NA	DNA Alkylating Agent	s-ewing-osteo-TC71-1	activity	1.3	4	-6.47921	4.95492	129.616	122.124	135.85	11	603.338	599.665	0.387839	0.360687	128.616	121.025	114.456	125.356	123.879	118.255	132.832	128.99	123.641	126.083	135.85	0.000780415	0.00234124	0.00702378	0.0210713	0.0632139	0.189642	0.568925	1.70678	5.12033	15.361	46.0829	Streptozocin	NA	DNA Alkylating Agent	CN(N=O)C(=O)N[C@H]1C(O)OC(CO)[C@@H](O)[C@@H]1O
NCGC00025245-01	Ginkgolide B	GABRA1	GABA(A) Receptor Antagonists	s-ewing-osteo-TC71-1	activity	4	-2.1	-4.82921	1.53859	10.4846	129.648	24.9197	11	554.448	553.536	0.992056	2.634e-07	128.027	125.871	132.954	130.447	131.617	131.198	124.723	128.63	106.078	70.3155	24.9197	0.000780415	0.00234124	0.00702378	0.0210713	0.0632139	0.189642	0.568925	1.70678	5.12033	15.361	46.0829	Ginkgolide B	GABRA1	GABA(A) Receptor Antagonists	CC1C(=O)OC2C(O)C34C5CC(C(C)(C)C)C36C(O)C(=O)OC6OC4(C(=O)O5)C12O
NCGC00025288-03	Deguelin	PIK3CA	PI3K Inhibitor	s-ewing-osteo-TC71-1	activity	4	-2.1	-4.62921	1.1	-11.8055	98.0375	7.56697	11	418.381	418.537	0.826958	0.0201572	104.43	109.329	114.1	97.317	97.4989	84.2477	84.3115	82.3606	77.6748	73.8134	7.56697	0.000780415	0.00234124	0.00702378	0.0210713	0.0632139	0.189642	0.568925	1.70678	5.12033	15.361	46.0829	Deguelin	PIK3CA	PI3K Inhibitor	COC1=CC2=C(C=C1OC)[C@H]3[C@@H](CO2)OC4=C(C=CC5=C4\C=C/C(C)(C)O5)C3=O
NCGC00025297-01	Gabexate mesilate	NFKB1	NF-kappaB Activation Inhibitor	s-ewing-osteo-TC71-1	activity	2.3	4	-4.97921	0.9	151.747	125.747	132.671	11	624.965	625.805	0.696473	0.114631	121.747	130.239	122.783	124.899	127.494	127.29	131.611	126.618	129.773	146.13	132.671	0.000780415	0.00234124	0.00702378	0.0210713	0.0632139	0.189642	0.568925	1.70678	5.12033	15.361	46.0829	Gabexate mesilate	NFKB1	NF-kappaB Activation Inhibitor	CCOC(=O)C1=CC=C(OC(=O)CCCCCNC(N)=N)C=C1
NCGC00025300-01	2-Methoxyestradiol	HIF1A	Hypoxia Inducible Factor 1-alpha Inhibitor	s-ewing-osteo-TC71-1	activity	4	-1.1	-5.57921	1.82648	32.6395	137.202	23.5209	11	525.686	530.412	0.975325	2.17832e-05	127.141	139.853	140.25	139.425	131.166	141.88	134.411	105.923	52.1368	49.5691	23.5209	0.000780415	0.00234124	0.00702378	0.0210713	0.0632139	0.189642	0.568925	1.70678	5.12033	15.361	46.0829	2-Methoxyestradiol	HIF1A	Hypoxia Inducible Factor 1-alpha Inhibitor	COC1=C(O)C=C2CCC3C(CC[C@]4(C)[C@@H](O)CCC34)C2=C1
NCGC00025323-01	Ubenimex	LTA4H	Leukotriene A4 Hydrolase Inhibitor	s-ewing-osteo-TC71-1	activity	4	-2.1	-4.57921	4.09497	-9.01901	125.064	3.31328	11	561.381	563.073	0.99423	7.45e-08	121.893	123.798	126.785	127.593	122.206	126.056	128.398	130.168	122.049	110.243	3.31328	0.000780415	0.00234124	0.00702378	0.0210713	0.0632139	0.189642	0.568925	1.70678	5.12033	15.361	46.0829	Ubenimex	LTA4H	Leukotriene A4 Hydrolase Inhibitor	CC(C)C[C@H](NC(=O)[C@@H](O)[C@H](N)CC1=CC=CC=C1)C(O)=O
NCGC00025325-03	Vapiprost hydrochloride	TBXA2R	Prostanoid TP Antagonist	s-ewing-osteo-TC71-1	activity	1.3	4	-5.62921	3.1925	105.636	121.034	107.779	11	561.406	562.278	0.835791	0.0173262	115.034	119.111	120.552	122.099	120.664	127.293	122.059	116.743	107.097	103.452	107.779	0.000780415	0.00234124	0.00702378	0.0210713	0.0632139	0.189642	0.568925	1.70678	5.12033	15.361	46.0829	Vapiprost hydrochloride	TBXA2R	Prostanoid TP Antagonist	O[C@H]1C[C@H](OCC2=CC=C(C=C2)C3=CC=CC=C3)[C@H](CC\C=C/CCC(O)=O)[C@H]1N4CCCCC4
NCGC00025329-02	SB-239063	MAPK14	p38 MAPK Inhibitor	s-ewing-osteo-TC71-1	activity	1.3	-2.2	-4.82921	0.5	87.7809	145.665	101.915	11	647.823	649.004	0.784338	0.037901	146.084	151.108	134.452	146.292	143.335	134.925	143.462	128.122	118.578	128.406	101.915	0.000780415	0.00234124	0.00702378	0.0210713	0.0632139	0.189642	0.568925	1.70678	5.12033	15.361	46.0829	SB-239063	MAPK14	p38 MAPK Inhibitor	COC1=NC(=CC=N1)C2=C(N=C[N]2C3CCC(O)CC3)C4=CC=C(F)C=C4
NCGC00025330-01	SB-408124	HCRTR1	Orexin OX-1 Antagonists	s-ewing-osteo-TC71-1	activity	2.3	4	-4.67921	1.88512	104.672	131.435	106.049	11	620.239	619.137	0.604274	0.16567	132.935	123.579	129.898	130.637	130.333	134.761	144.673	123.054	127.544	125.804	106.049	0.000780415	0.00234124	0.00702378	0.0210713	0.0632139	0.189642	0.568925	1.70678	5.12033	15.361	46.0829	SB-408124	HCRTR1	Orexin OX-1 Antagonists	CN(C)C1=CC=C(NC(=O)NC2=CC(=NC3=C2C=C(F)C=C3F)C)C=C1
NCGC00025341-01	Isradipine	NA	Calcium Channel Blocker	s-ewing-osteo-TC71-1	activity	4	-2.1	-4.57921	4.09497	9.43113	127.744	20.3054	11	578.937	578.824	0.983834	4.2619e-06	124.866	124.468	129.208	135.42	121.564	132.639	129.058	127.93	122.503	116.275	20.3054	0.000780415	0.00234124	0.00702378	0.0210713	0.0632139	0.189642	0.568925	1.70678	5.12033	15.361	46.0829	Isradipine	NA	Calcium Channel Blocker	COC(=O)C\1=C(C)\N\C(=C(/C1C2=CC=CC3=NON=C23)C(=O)OC(C)C)C
NCGC00025346-01	Mirtazapine	HTR2A	5-HT2A/3 Antagonists?	s-ewing-osteo-TC71-1	activity	1.3	4	-5.42921	4.95492	124.92	134.994	122.099	11	637.22	637.369	0.577055	0.190178	135.494	130.335	130.244	139.536	137.557	140.918	129.801	135.633	126.529	127.446	122.099	0.000780415	0.00234124	0.00702378	0.0210713	0.0632139	0.189642	0.568925	1.70678	5.12033	15.361	46.0829	Mirtazapine	HTR2A	5-HT2A/3 Antagonists?	CN1CCN2C(C1)C3=C(CC4=C2N=CC=C4)C=CC=C3
NCGC00025355-11	Paroxetine	HTR1A	5-HT Reuptake Inhibitor	s-ewing-osteo-TC71-1	activity	2.1	-2.2	-4.72921	1.34431	80.7737	134.176	88.5537	11	617.469	618.761	0.902064	0.00330565	127.454	136.782	135.793	135.167	133.321	142.998	133.142	127.232	122.312	115.538	88.5537	0.000780415	0.00234124	0.00702378	0.0210713	0.0632139	0.189642	0.568925	1.70678	5.12033	15.361	46.0829	Paroxetine	HTR1A	5-HT Reuptake Inhibitor	FC1=CC=C(C=C1)[C@@H]2CCNC[C@H]2COC3=CC=C4OCOC4=C3
NCGC00025357-01	Nicorandil	NA	K(ATP) Channel Activators	s-ewing-osteo-TC71-1	activity	2.3	-3	-4.57921	4.09497	83.9661	117.765	87.1826	11	556.033	557.721	0.811273	0.0260422	113.265	114.786	120.377	122.753	119.095	112.743	111.774	126.014	120.101	114.588	87.1826	0.000780415	0.00234124	0.00702378	0.0210713	0.0632139	0.189642	0.568925	1.70678	5.12033	15.361	46.0829	Nicorandil	NA	K(ATP) Channel Activators	O=C(NCCO[N+]([O-])=O)c1cccnc1
NCGC00025379-01	SR 33805	NA	Ca2+ channel antagonist	s-ewing-osteo-TC71-1	activity	1.3	4	-5.47921	4.95492	113.016	129.717	108.466	11	603.54	604.615	0.822433	0.0218356	130.717	131.521	126.109	124.25	132.05	129.024	131.489	133.392	113.365	118.369	108.466	0.000780415	0.00234124	0.00702378	0.0210713	0.0632139	0.189642	0.568925	1.70678	5.12033	15.361	46.0829	SR 33805	NA	Ca2+ channel antagonist	COC1=CC=C(CCN(C)CCCOC2=CC=C(C=C2)[S+]([O-])(=O)C3=C(C(C)C)C4=CC=CC=C4[NH]3)C=C1OC
NCGC00037850-05	NCGC00037850	HPGD	HPGD Inhibitor	s-ewing-osteo-TC71-1	activity	1.3	4	-5.02921	0.7	117.849	139.532	121.63	11	651.169	650.748	0.568816	0.197113	140.532	131.806	149.95	135.135	134.168	142.149	138.277	132.025	130.878	129.403	121.63	0.000780415	0.00234124	0.00702378	0.0210713	0.0632139	0.189642	0.568925	1.70678	5.12033	15.361	46.0829	NCGC00037850	HPGD	HPGD Inhibitor	CC1=CC(=C(C)[N]1C2=CC=CC=C2)C3=NN=C4CCCCC[N]34
NCGC00065890-07	Nevirapine	TERT	Reverse Transcriptase Inhibitor	s-ewing-osteo-TC71-1	activity	1.3	4	-6.97921	0.5	135.154	119.154	133.028	11	615.041	615.357	0.824209	0.0212992	120.654	121.219	121.259	126.251	125.205	128.78	127.45	136.925	129.757	136.163	133.028	0.000780415	0.00234124	0.00702378	0.0210713	0.0632139	0.189642	0.568925	1.70678	5.12033	15.361	46.0829	Nevirapine	TERT	Reverse Transcriptase Inhibitor	CC1=CC=NC2=C1NC(=O)C3=CC=CN=C3N2C4CC4
NCGC00065934-06	Oxcarbazepine	NA	Sodium channel inhibitor	s-ewing-osteo-TC71-1	activity	1.3	4	-7.72921	0.5	128.958	111.958	126.958	11	593.91	594.689	0.526921	0.235029	113.458	118.417	114.434	128.928	121.195	114.927	130.011	131.829	130.205	126.828	126.958	0.000780415	0.00234124	0.00702378	0.0210713	0.0632139	0.189642	0.568925	1.70678	5.12033	15.361	46.0829	Oxcarbazepine	NA	Sodium channel inhibitor	NC(=O)N1C2=CC=CC=C2CC(=O)C3=CC=CC=C13
NCGC00068236-08	Gatifloxacin	TOP2B	DNA Topoisomerase IV Inhibitors	s-ewing-osteo-TC71-1	activity	1.3	4	-5.57921	4.95492	124.048	143.728	117.828	11	666.033	668.074	0.728603	0.0696375	139.228	134.54	145.616	149.906	146.568	140.466	147.787	142.432	123.491	132.135	117.828	0.000780415	0.00234124	0.00702378	0.0210713	0.0632139	0.189642	0.568925	1.70678	5.12033	15.361	46.0829	Gatifloxacin	TOP2B	DNA Topoisomerase IV Inhibitors	COC1=C(N2CCNC(C)C2)C(=CC3=C1N(\C=C(C(O)=O)/C3=O)C4CC4)F
NCGC00070736-04	Imiquimod	TLR7	TLR 7 Receptor Antagonist	s-ewing-osteo-TC71-1	activity	4	-2.1	-4.72921	1.71374	-9.51339	140.968	2.0138	11	605.146	603.86	0.943294	0.00048738	146.104	148.758	132.768	142.436	142.638	144.469	140.671	142.977	104.413	92.2938	2.0138	0.000780415	0.00234124	0.00702378	0.0210713	0.0632139	0.189642	0.568925	1.70678	5.12033	15.361	46.0829	Imiquimod	TLR7	TLR 7 Receptor Antagonist	CC(C)C[N]1C=NC2=C(N)N=C3C=CC=CC3=C12
NCGC00079434-03	KL001	NA	Cryptochrome Activator	s-ewing-osteo-TC71-1	activity	2.1	-3	-4.57921	4.09497	51.2282	133.437	58.7477	11	617.008	618.907	0.906941	0.00277884	123.937	125.017	142.884	129.063	143.563	142.105	126.843	137.341	130.371	124.277	58.7477	0.000780415	0.00234124	0.00702378	0.0210713	0.0632139	0.189642	0.568925	1.70678	5.12033	15.361	46.0829	KL001	NA	Cryptochrome Activator	C[S+]([O-])(=O)N(CC(O)C[N]1C2=CC=CC=C2C3=CC=CC=C13)CC4=CC=CO4
NCGC00081778-04	SID 7969543	NR5A1	SF1 (NR5A1) Receptor Antagonist	s-ewing-osteo-TC71-1	activity	2.3	4	-4.42921	4.95492	95.629	117.786	101.155	11	561.518	563.164	0.543933	0.219669	111.286	112.796	118.854	115.897	120.023	122.286	116.195	115.585	117.333	127.634	101.155	0.000780415	0.00234124	0.00702378	0.0210713	0.0632139	0.189642	0.568925	1.70678	5.12033	15.361	46.0829	SID 7969543	NR5A1	SF1 (NR5A1) Receptor Antagonist	CCOC(=O)C(C)OC1=CC=CC2=C1\C=C/N(CC(=O)NC3=CC=C4OCCOC4=C3)C2=O
NCGC00087387-03	Droxinostat	HDAC6	Histone Deacetylase (HDAC) 3/6/8 Inhibitor	s-ewing-osteo-TC71-1	activity	4	-2.1	-5.02921	1.1	-5.45434	118.368	14.3452	11	470.894	472.703	0.984616	3.5136e-06	113.343	112.332	119.87	123.118	126.006	118.395	108.006	101.036	80.473	36.5933	14.3452	0.000780415	0.00234124	0.00702378	0.0210713	0.0632139	0.189642	0.568925	1.70678	5.12033	15.361	46.0829	Droxinostat	HDAC6	Histone Deacetylase (HDAC) 3/6/8 Inhibitor	CC1=CC(=CC=C1OCCCC(=O)NO)Cl
NCGC00090504-10	Isoliquiritigenin	SIRT1	Histone Deacetylase/SIRT1 Activator	s-ewing-osteo-TC71-1	activity	4	-2.1	-4.82921	1.34372	1.63891	123.807	22.2675	11	522.521	522.19	0.99216	2.501e-07	125.411	129.147	124.525	124.967	122.506	117.195	122.216	114.772	102.801	60.839	22.2675	0.000780415	0.00234124	0.00702378	0.0210713	0.0632139	0.189642	0.568925	1.70678	5.12033	15.361	46.0829	Isoliquiritigenin	SIRT1	Histone Deacetylase/SIRT1 Activator	OC1=CC=C(C=C1)/C=C/C(=O)C2=C(O)C=C(O)C=C2
NCGC00090686-10	Nitrofurazone	NA	Antibiotic	s-ewing-osteo-TC71-1	activity	2.1	-3	-4.62921	4.09497	78.1648	125.947	81.4705	11	589.615	591.594	0.905998	0.00287872	122.042	118.88	126.477	124.283	122.081	132.092	133.383	128.87	126.431	119.621	81.4705	0.000780415	0.00234124	0.00702378	0.0210713	0.0632139	0.189642	0.568925	1.70678	5.12033	15.361	46.0829	Nitrofurazone	NA	Antibiotic	NC(=O)N/N=C/C1=CC=C(O1)[N+]([O-])=O
NCGC00090691-03	2'	3'-Dideoxyinosine	TERT	s-ewing-osteo-TC71-1	activity	2.3	-3	-4.42921	4.95492	73.0547	112.247	81.8368	11	531.33	533.806	0.806152	0.0281241	105.747	113.735	104.712	113.849	116.951	112.884	115.92	115.824	107.835	117.224	81.8368	0.000780415	0.00234124	0.00702378	0.0210713	0.0632139	0.189642	0.568925	1.70678	5.12033	15.361	46.0829	2'	3'-Dideoxyinosine	TERT	Reverse Transcriptase Inhibitor	O=C3NC=Nc2c3ncn2[C@H]1CC[C@@H](CO)O1
NCGC00090705-11	Zalcitabine	TERT	Reverse Transcriptase Inhibitor	s-ewing-osteo-TC71-1	activity	5	4	NA	NA	NA	NA	118.291	11	NA	577.067	NA	NA	115.529	120.632	115.803	117.378	124.412	132.393	125.308	116.335	114.771	116.749	118.291	0.000780415	0.00234124	0.00702378	0.0210713	0.0632139	0.189642	0.568925	1.70678	5.12033	15.361	46.0829	Zalcitabine	TERT	Reverse Transcriptase Inhibitor	NC/1=N/C(=O)N(/C=C1)[C@H]2CC[C@@H](CO)O2
NCGC00090726-11	Ribavirin	IMPDH1	Inosine 5'-Monophosphate Dehydrogenase (IMPDH) Inhibitors	s-ewing-osteo-TC71-1	activity	1.3	4	-4.87921	4.95492	126.667	140.668	126.583	11	667.715	667.332	0.702675	0.087629	141.168	144.581	137.491	134.94	145.093	141.981	139.06	137.616	143.792	130.833	126.583	0.000780415	0.00234124	0.00702378	0.0210713	0.0632139	0.189642	0.568925	1.70678	5.12033	15.361	46.0829	Ribavirin	IMPDH1	Inosine 5'-Monophosphate Dehydrogenase (IMPDH) Inhibitors	NC(=O)C1=N[N](C=N1)[C@@H]2O[C@H](CO)[C@@H](O)[C@H]2O
NCGC00090749-11	Diethylstilbestrol	ESR1	Estrogen Receptor (ER) Agonist	s-ewing-osteo-TC71-1	activity	2.3	-2.1	-4.57921	4.09497	22.0982	127.714	31.8226	11	582.558	582.981	0.869735	0.00841251	131.052	134.779	135.437	143.083	130.77	125.836	126.841	98.1488	126.003	117.172	31.8226	0.000780415	0.00234124	0.00702378	0.0210713	0.0632139	0.189642	0.568925	1.70678	5.12033	15.361	46.0829	Diethylstilbestrol	ESR1	Estrogen Receptor (ER) Agonist	CCC(/C1=CC=C(O)C=C1)=C(/CC)C2=CC=C(O)C=C2
NCGC00090752-08	Fenretinide	RARB	RARbeta/gamma Agonist	s-ewing-osteo-TC71-1	activity	4	-1.1	-5.26797	1.62662	-6.90257	114.607	2.27348	11	418.811	423.737	0.983386	4.7381e-06	108.972	110.391	114.397	113.482	114.77	114.218	114.971	77.4488	17.9367	10.7146	2.27348	0.00156083	0.00468253	0.0140476	0.0421426	0.126428	0.379284	1.13785	3.41355	10.2407	30.722	92.1659	Fenretinide	RARB	RARbeta/gamma Agonist	C\C1=C(/C=C/C(C)=C/C=C/C(C)=C/C(=O)NC2=CC=C(O)C=C2)C(C)(C)CCC1
NCGC00090753-05	Azithromycin	NA	50S Ribosomal Protein Inhibitors	s-ewing-osteo-TC71-1	activity	1.3	-2.4	-4.82921	1.24751	98.9973	131.744	104.705	11	613.421	613.757	0.793486	0.0336496	128.244	131.548	127.152	128.523	138.106	137.705	126.307	135.408	120.508	116.87	104.705	0.000780415	0.00234124	0.00702378	0.0210713	0.0632139	0.189642	0.568925	1.70678	5.12033	15.361	46.0829	Azithromycin	NA	50S Ribosomal Protein Inhibitors	CC[C@H]1OC(=O)[C@H](C)[C@@H](O[C@H]2C[C@@](C)(OC)[C@@H](O)[C@H](C)O2)[C@H](C)[C@@H](O[C@@H]3O[C@H](C)C[C@@H]([C@H]3O)N(C)C)[C@](C)(O)C[C@@H](C)CN(C)[C@H](C)[C@@H](O)[C@]1(C)O
NCGC00090757-05	Melphalan	NA	DNA Alkylating Agent	s-ewing-osteo-TC71-1	activity	4	-2.1	-5.02921	1.1	-8.74894	129.892	12.1666	11	514.549	517.952	0.98845	1.1472e-06	119.979	134.725	130.461	136.078	133.163	126.411	120.356	114.105	81.2419	42.058	12.1666	0.000780415	0.00234124	0.00702378	0.0210713	0.0632139	0.189642	0.568925	1.70678	5.12033	15.361	46.0829	Melphalan	NA	DNA Alkylating Agent	N[C@@H](CC1=CC=C(C=C1)N(CCCl)CCCl)C(O)=O
NCGC00090759-02	Cisplatin	NA	DNA Alkylating Agent	s-ewing-osteo-TC71-1	activity	2.3	-3	-4.62921	4.09497	89.7265	121.829	91.8269	11	574.995	576.493	0.711953	0.0807258	117.329	113.014	118.267	131.343	127.991	119.966	128.499	125.11	115.898	116.788	91.8269	0.000780415	0.00234124	0.00702378	0.0210713	0.0632139	0.189642	0.568925	1.70678	5.12033	15.361	46.0829	Cisplatin	NA	DNA Alkylating Agent	N[Pt](N)(Cl)Cl
NCGC00090762-03	Rifabutin	PRKDC	DNA-Directed RNA Polymerase Inhibitor	s-ewing-osteo-TC71-1	activity	1.3	4	-5.07921	4.95492	100.895	121.032	103.875	11	566.281	566.964	0.632986	0.141262	119.532	111.179	115.752	130.359	113.813	127.439	125.505	124.646	121.189	99.0011	103.875	0.000780415	0.00234124	0.00702378	0.0210713	0.0632139	0.189642	0.568925	1.70678	5.12033	15.361	46.0829	Rifabutin	PRKDC	DNA-Directed RNA Polymerase Inhibitor	CO[C@H]1\C=C\O[C@@]2(C)OC3=C(C2=O)C4=C(C(=C3C)O)C(=O)\C(=C/5NC6(CCN(CC6)CC(C)C)/N=C45)NC(=O)\C(=C/C=C/[C@H](C)[C@H](O)[C@@H](C)[C@@H](O)[C@@H](C)[C@H](OC(C)=O)[C@@H]1C)C
NCGC00090766-08	Prednisone???	NA	Glucocorticoid steroid	s-ewing-osteo-TC71-1	activity	2.3	4	-5.19041	4.95492	117.01	129.037	129.925	11	648.075	651.074	0.315391	0.445528	126.037	130.896	122.113	127.961	132.203	136.621	124.586	130.779	131.396	120.181	129.925	0.00039023	0.00117065	0.00351189	0.0105357	0.031607	0.0948209	0.284463	0.853388	2.56016	7.68049	23.0415	Prednisone???	NA	Glucocorticoid steroid	C[C@]12CC(=O)[C@H]3[C@@H](CC\C4=C\C(=O)\C=C/[C@]34C)[C@@H]1CC[C@]2(O)C(=O)CO
NCGC00090774-03	Nitazoxanide	NA	antiprotozoal agent	s-ewing-osteo-TC71-1	activity	4	-1.1	-4.71797	2.25265	5.17132	115.193	13.4653	11	495.869	495.446	0.98468	3.4572e-06	109.908	107.92	119.167	116.862	114.313	111.679	118.213	118.95	96.6315	28.4422	13.4653	0.00156083	0.00468253	0.0140476	0.0421426	0.126428	0.379284	1.13785	3.41355	10.2407	30.722	92.1659	Nitazoxanide	NA	antiprotozoal agent	CC(=O)OC1=C(C=CC=C1)C(=O)NC2=NC=C(S2)[N+]([O-])=O
NCGC00090782-07	Viracept	NA	HIV Protease Inhibitors	s-ewing-osteo-TC71-1	activity	4	-2.1	-4.67921	4.09497	-8.33159	129.214	2.45477	11	570.203	571.895	0.978131	1.37085e-05	127.878	136.151	131.926	134.49	131.942	129.579	132.137	116.531	122.802	97.7289	2.45477	0.000780415	0.00234124	0.00702378	0.0210713	0.0632139	0.189642	0.568925	1.70678	5.12033	15.361	46.0829	Viracept	NA	HIV Protease Inhibitors	CC1=C(C=CC=C1O)C(=O)N[C@@H](CSC2=CC=CC=C2)[C@H](O)CN3C[C@H]4CCCC[C@H]4C[C@H]3C(=O)NC(C)(C)C
NCGC00090797-11	Digoxin	NA	Steroid	s-ewing-osteo-TC71-1	activity	4	-1.1	-6.61797	2.25265	5.9563	118.658	4.70406	11	297.979	297.432	0.989002	9.468e-07	129.928	119.868	106.977	113.008	101.964	30.5145	9.27506	8.12697	7.73521	5.95023	4.70406	0.00156083	0.00468253	0.0140476	0.0421426	0.126428	0.379284	1.13785	3.41355	10.2407	30.722	92.1659	Digoxin	NA	Steroid	C[C@H]1O[C@H](C[C@H](O)[C@@H]1O)O[C@H]2[C@@H](O)C[C@@H](O[C@@H]2C)O[C@H]3[C@@H](O)C[C@@H](O[C@@H]3C)O[C@H]4CC[C@@]5(C)[C@H](CC[C@@H]6[C@@H]5C[C@@H](O)[C@]7(C)[C@H](CC[C@]67O)C/8=C/C(=O)OC8)C4
NCGC00090808-03	Amphotericin B	NA	Macrolide Antibiotic	s-ewing-osteo-TC71-1	activity	4	-1.1	-6.42921	4.95492	3.04989	113.655	2.2024	11	308.868	311.781	0.988605	1.0878e-06	99.8683	114.327	110.203	112.48	122.089	119.227	14.3147	4.32454	2.58189	2.7151	2.2024	0.000780415	0.00234124	0.00702378	0.0210713	0.0632139	0.189642	0.568925	1.70678	5.12033	15.361	46.0829	Amphotericin B	NA	Macrolide Antibiotic	C[C@H]1O[C@@H](O[C@@H]\2C[C@@H]3O[C@](O)(C[C@@H](O)C[C@@H](O)[C@H](O)CC[C@@H](O)C[C@@H](O)CC(=O)O[C@@H](C)[C@H](C)[C@H](O)[C@@H](C)/C=C/C=C/C=C/C=C/C=C/C=C/C=C2)C[C@H](O)[C@H]3C(O)=O)[C@@H](O)[C@@H](N)[C@@H]1O
NCGC00090851-09	Azacitidine	DNMT1	DNA Methyltransferase (DNMT) Inhibitor	s-ewing-osteo-TC71-1	activity	4	-1.1	-5.37921	1.55795	7.04952	120.633	8.64141	11	456.554	455.898	0.996448	1.09e-08	122.347	115.753	122.963	118.801	121.909	121.32	112.321	101.273	53.5364	21.5057	8.64141	0.000780415	0.00234124	0.00702378	0.0210713	0.0632139	0.189642	0.568925	1.70678	5.12033	15.361	46.0829	Azacitidine	DNMT1	DNA Methyltransferase (DNMT) Inhibitor	NC/1=N/C(=O)N(/C=N1)[C@@H]2O[C@H](CO)[C@@H](O)[C@H]2O
NCGC00090903-09	Sulfasalazine	NFKB1	NFKB Activation Inhibitors	s-ewing-osteo-TC71-1	activity	1.3	4	-8.57921	0.8	140.053	127.553	142.279	11	664.319	664.109	0.461937	0.295479	129.553	135.394	137.161	134.63	140.721	141.009	135.256	145.826	134.275	141.154	142.279	0.000780415	0.00234124	0.00702378	0.0210713	0.0632139	0.189642	0.568925	1.70678	5.12033	15.361	46.0829	Sulfasalazine	NFKB1	NFKB Activation Inhibitors	OC(=O)C1=CC(=CC=C1O)/N=N/C2=CC=C(C=C2)[S+]([O-])(=O)NC3=NC=CC=C3
NCGC00090905-11	Busulfan	NA	DNA Alkylating Agent	s-ewing-osteo-TC71-1	activity	2.3	-2.4	-4.77921	0.5	96.7758	143.631	107.205	11	649.5	650.906	0.730494	0.0683743	138.131	143.152	148.613	137.381	149.651	139.214	129.773	124.973	134.539	126.311	107.205	0.000780415	0.00234124	0.00702378	0.0210713	0.0632139	0.189642	0.568925	1.70678	5.12033	15.361	46.0829	Busulfan	NA	DNA Alkylating Agent	C[S+]([O-])(=O)OCCCCO[S+](C)([O-])=O
NCGC00091009-05	17-Methyltestosterone	CYP19A1	Aromatase Inhibitor	s-ewing-osteo-TC71-1	activity	4	-1.3	-5.21797	4.95492	20.5406	121.037	37.0712	11	481.678	478.567	0.942047	0.35442	124.048	117.195	117.697	116.742	118.187	125.08	115.735	129.467	9.03976	114.082	37.0712	0.00156083	0.00468253	0.0140476	0.0421426	0.126428	0.379284	1.13785	3.41355	10.2407	30.722	92.1659	17-Methyltestosterone	CYP19A1	Aromatase Inhibitor	O=C4CC[C@@]3(C)C(CC[C@@H]2[C@@H]3CC[C@@]1(C)[C@H]2CC[C@]1(C)O)=C4
NCGC00091011-09	Chloramphenicol	NA	Antibiotic	s-ewing-osteo-TC71-1	activity	1.3	4	-6.77921	0.3	134.773	115.273	131.419	11	601.933	602.272	0.660463	0.119511	116.773	117.251	127.961	123.536	119.431	121.055	130.239	128.48	129.296	131.201	131.419	0.000780415	0.00234124	0.00702378	0.0210713	0.0632139	0.189642	0.568925	1.70678	5.12033	15.361	46.0829	Chloramphenicol	NA	Antibiotic	OC[C@@H](NC(=O)C(Cl)Cl)[C@H](O)C1=CC=C(C=C1)[N+]([O-])=O
NCGC00091014-06	Hydroxyflutamide	AR	Androgen Receptor Antagonist	s-ewing-osteo-TC71-1	activity	4	-2.1	-4.62921	4.09497	-2.36883	124.702	7.59592	11	557.471	556.594	0.984695	3.4445e-06	123.465	121.052	116.43	125.626	127.82	131.325	129.389	123.852	124.55	100.428	7.59592	0.000780415	0.00234124	0.00702378	0.0210713	0.0632139	0.189642	0.568925	1.70678	5.12033	15.361	46.0829	Hydroxyflutamide	AR	Androgen Receptor Antagonist	CC(C)(O)C(=O)NC1=CC(=C(C=C1)[N+]([O-])=O)C(F)(F)F
NCGC00091019-08	Betamethasone	NR3C1	Antiinflammatory; glucocorticoid receptor antagonist	s-ewing-osteo-TC71-1	activity	1.3	4	-8.02921	0.3	121.131	99.0744	117.795	11	548.34	549.054	0.56203	0.203496	103.131	115.177	103.084	112.358	113.329	118.688	112.852	116.698	115.288	124.079	117.795	0.000780415	0.00234124	0.00702378	0.0210713	0.0632139	0.189642	0.568925	1.70678	5.12033	15.361	46.0829	Betamethasone	NR3C1	Antiinflammatory; glucocorticoid receptor antagonist	OCC(=O)[C@@]4(O)[C@@H](C)C[C@@H]3[C@]4(C)C[C@H](O)[C@@]2(F)[C@H]3CCC1=CC(=O)C=C[C@@]12C
NCGC00091032-08	Cyproterone acetate	AR	Androgen Receptor Antagonist	s-ewing-osteo-TC71-1	activity	4	-2.1	-4.87921	3.98997	-0.217377	126.494	2.19149	11	533.087	532.581	0.990389	5.576e-07	122.635	125.971	116.061	127.748	128.826	126.476	128.632	130.807	127.435	41.7057	2.19149	0.000780415	0.00234124	0.00702378	0.0210713	0.0632139	0.189642	0.568925	1.70678	5.12033	15.361	46.0829	Cyproterone acetate	AR	Androgen Receptor Antagonist	CC(=O)O[C@@]1(CC[C@H]2[C@@H]3\C=C(Cl)/C4=C/C(=O)[C@@H]5C[C@@H]5[C@]4(C)[C@H]3CC[C@]12C)C(C)=O
NCGC00091057-06	Silybin	NA	P-Glycoprotein (MDR-1) Inhibitor	s-ewing-osteo-TC71-1	activity	1.1	-2.1	-4.82921	1.75295	23.7767	126.324	36.6124	11	549.397	548.09	0.991115	4.096e-07	128.296	124.851	131.337	122.074	128.31	124.092	125.948	120.061	114.385	72.5123	36.6124	0.000780415	0.00234124	0.00702378	0.0210713	0.0632139	0.189642	0.568925	1.70678	5.12033	15.361	46.0829	Silybin	NA	P-Glycoprotein (MDR-1) Inhibitor	COC1=C(O)C=CC(=C1)[C@H]2OC3=C(O[C@@H]2CO)C=CC(=C3)[C@H]4OC5=C(C(=CC(=C5)O)O)C(=O)[C@@H]4O
NCGC00091062-07	5-Hydroxytryptophan	NA	Serotonin modulator	s-ewing-osteo-TC71-1	activity	2.3	4	-4.57921	4.09497	104.09	126.538	106.164	11	601.566	603.992	0.722333	0.0739155	119.038	125.835	129.587	132.554	125.756	130.844	128.056	126.444	121.821	124.529	106.164	0.000780415	0.00234124	0.00702378	0.0210713	0.0632139	0.189642	0.568925	1.70678	5.12033	15.361	46.0829	5-Hydroxytryptophan	NA	Serotonin modulator	N[C@@H](CC1=C[NH]C2=CC=C(O)C=C12)C(O)=O
NCGC00091104-05	Aspartame	NA	synthetic sugar substitute	s-ewing-osteo-TC71-1	activity	2.1	-3	-4.57921	4.09497	53.327	126.098	60.1173	11	584.528	585.917	0.949064	0.000330192	122.959	128.707	137.337	129.123	120.051	124.889	123.414	126.484	122.44	119.576	60.1173	0.000780415	0.00234124	0.00702378	0.0210713	0.0632139	0.189642	0.568925	1.70678	5.12033	15.361	46.0829	Aspartame	NA	synthetic sugar substitute	COC(=O)[C@H](CC1=CC=CC=C1)NC(=O)[C@@H](N)CC(O)=O
NCGC00091109-03	Neohesperidin dihydrochalcone	NA	synthetic sugar substitute	s-ewing-osteo-TC71-1	activity	4	-1.1	-5.02921	4.09497	4.79716	128.084	5.04195	11	525.247	524.47	0.993378	1.283e-07	127.433	122.473	125.351	132.067	131.486	123.437	135.161	125.396	118.617	18.6371	5.04195	0.000780415	0.00234124	0.00702378	0.0210713	0.0632139	0.189642	0.568925	1.70678	5.12033	15.361	46.0829	Neohesperidin dihydrochalcone	NA	synthetic sugar substitute	COC1=C(O)C=C(CCC(=O)C2=C(O)C=C(O[C@@H]3O[C@H](CO)[C@@H](O)[C@H](O)[C@H]3O[C@@H]4O[C@@H](C)[C@H](O)[C@@H](O)[C@H]4O)C=C2O)C=C1
NCGC00091112-08	Methylrosaniline chloride	NA	TNFR1 (p55/CD120a) Modulator	s-ewing-osteo-TC71-1	activity	4	-1.1	-6.52921	1.34431	9.73162	149.508	-0.56284	11	407.15	408.591	0.983094	5.0698e-06	146.501	147.818	149.804	139.625	147.584	94.8927	42.8938	38.0328	11.9199	10.8686	-0.56284	0.000780415	0.00234124	0.00702378	0.0210713	0.0632139	0.189642	0.568925	1.70678	5.12033	15.361	46.0829	Methylrosaniline chloride	NA	TNFR1 (p55/CD120a) Modulator	CN(C)C1=CC=C(C=C1)C(C2=CC=C(C=C2)N(C)C)=C/3\C=C/C(/C=C3)=[N+](C)C
NCGC00091253-07	Asaraldehyde	PTGS2	Cyclooxygenase-2 Inhibitor	s-ewing-osteo-TC71-1	activity	2.1	-3	-4.42921	4.95492	44.9997	125.222	65.0085	11	585.107	583.427	0.92053	0.00161612	127.536	127.781	115.203	125.276	117.072	128.462	126.707	120.945	133.148	127.114	65.0085	0.000780415	0.00234124	0.00702378	0.0210713	0.0632139	0.189642	0.568925	1.70678	5.12033	15.361	46.0829	Asaraldehyde	PTGS2	Cyclooxygenase-2 Inhibitor	COC1=CC(=C(C=O)C=C1OC)OC
NCGC00091268-11	Oxytetracycline	NA	Tetracycline Antibiotic	s-ewing-osteo-TC71-1	activity	1.3	4	-4.97921	1.4641	123.66	140.554	125.976	11	663.556	662.328	0.473892	0.283241	142.554	129.918	144.575	139.068	137.98	143.136	149.548	132.567	139.831	127.934	125.976	0.000780415	0.00234124	0.00702378	0.0210713	0.0632139	0.189642	0.568925	1.70678	5.12033	15.361	46.0829	Oxytetracycline	NA	Tetracycline Antibiotic	CN(C)[C@H]\1[C@@H]2[C@@H](O)[C@H]3\C(=C(O)/[C@]2(O)C(=O)\C(=C1O)C(N)=O)C(=O)C4=C(C=CC=C4O)[C@@]3(C)O
NCGC00091281-07	Daminozide	NA	KDM2/7 Histone Demethylases Inhibitor	s-ewing-osteo-TC71-1	activity	2.1	-3	-4.47921	4.09497	72.3853	127.31	83.6821	11	598.906	600.902	0.94892	0.000333978	123.31	126.577	129.075	129.337	130.103	129.838	132.395	124.281	122.776	125.338	83.6821	0.000780415	0.00234124	0.00702378	0.0210713	0.0632139	0.189642	0.568925	1.70678	5.12033	15.361	46.0829	Daminozide	NA	KDM2/7 Histone Demethylases Inhibitor	CN(C)NC(=O)CCC(O)=O
NCGC00091455-08	Celecoxib	PTGS2	Cyclooxygenase-2 Inhibitor	s-ewing-osteo-TC71-1	activity	1.1	-2.2	-4.87921	3.98997	88.8186	141.69	88.5598	11	649.793	649.963	0.962708	0.000104193	141.575	142.422	139.379	147.405	143.214	139.158	143.292	133.705	143.873	108.166	88.5598	0.000780415	0.00234124	0.00702378	0.0210713	0.0632139	0.189642	0.568925	1.70678	5.12033	15.361	46.0829	Celecoxib	PTGS2	Cyclooxygenase-2 Inhibitor	CC1=CC=C(C=C1)C2=CC(=N[N]2C3=CC=C(C=C3)[S+](N)([O-])=O)C(F)(F)F
NCGC00091533-11	Ethinylestradiol	ESR1	Estrogen Receptor (ER) Agonist	s-ewing-osteo-TC71-1	activity	4	-2.1	-4.77921	1.41632	7.8696	130.646	23.1616	11	560.945	560.474	0.963141	9.96603e-05	132.39	139.47	132.557	123.969	126.188	130.762	130.733	123.641	103.354	84.5296	23.1616	0.000780415	0.00234124	0.00702378	0.0210713	0.0632139	0.189642	0.568925	1.70678	5.12033	15.361	46.0829	Ethinylestradiol	ESR1	Estrogen Receptor (ER) Agonist	C[C@]12CC[C@H]3[C@@H](CCC4=CC(=CC=C34)O)[C@@H]1CC[C@@]2(O)C#C
NCGC00091544-08	beta-Estradiol	ESR1	Estrogen Receptor (ER) Agonist	s-ewing-osteo-TC71-1	activity	4	-2.1	-4.77921	1.47809	4.71344	132.384	20.1657	11	567.373	567.954	0.967095	6.50534e-05	130.539	132.002	143.176	133.944	135.112	122.092	132.66	125.964	107.157	81.421	20.1657	0.000780415	0.00234124	0.00702378	0.0210713	0.0632139	0.189642	0.568925	1.70678	5.12033	15.361	46.0829	beta-Estradiol	ESR1	Estrogen Receptor (ER) Agonist	C[C@]12CC[C@H]3[C@@H](CCC4=C3C=CC(=C4)O)[C@@H]1CC[C@@H]2O
NCGC00091585-03	2-Ethylhexyl-2-cyano-3	3-diphenylacrylate	NA	s-ewing-osteo-TC71-1	activity	2.3	4	-4.42921	4.95492	83.9506	114.115	90.8114	11	542.199	544.031	0.636234	0.138654	105.115	109.587	107.278	118.697	121.23	113.215	111.806	116.262	119.932	117.523	90.8114	0.000780415	0.00234124	0.00702378	0.0210713	0.0632139	0.189642	0.568925	1.70678	5.12033	15.361	46.0829	2-Ethylhexyl-2-cyano-3	3-diphenylacrylate	NA	photosensitizer	CCC(CCCC)COC(=O)C(\C#N)=C(\c1ccccc1)c2ccccc2
NCGC00091823-05	Chrysophanol	FLT1	VEGFR-1/2 Inhibitor	s-ewing-osteo-TC71-1	activity	1.3	4	-8.07921	3.06545	133.67	118.955	128.021	11	627.306	627.385	0.579521	0.187531	119.67	118.658	124.23	132.445	136.652	136.957	121.921	133.549	135.372	141.802	128.021	0.000780415	0.00234124	0.00702378	0.0210713	0.0632139	0.189642	0.568925	1.70678	5.12033	15.361	46.0829	Chrysophanol	FLT1	VEGFR-1/2 Inhibitor	CC1=CC(=C2C(=O)C3=C(O)C=CC=C3C(=O)C2=C1)O
NCGC00091835-09	Chlormethine	NA	DNA Alkylating Agent	s-ewing-osteo-TC71-1	activity	2.1	-3	-4.47921	4.95492	23.3277	128.747	40.4334	11	593.606	595.711	0.969955	4.61364e-05	123.576	127.222	130.627	124.276	137.012	121.446	135.068	130.239	129.83	127.827	40.4334	0.000780415	0.00234124	0.00702378	0.0210713	0.0632139	0.189642	0.568925	1.70678	5.12033	15.361	46.0829	Chlormethine	NA	DNA Alkylating Agent	CN(CCCl)CCCl
NCGC00091861-06	Dacarbazine	NA	DNA Alkylating Agent	s-ewing-osteo-TC71-1	activity	2.1	-2.2	-4.72921	2.25265	50.8684	133.949	57.2702	11	605.918	604.225	0.955885	0.000194601	137.293	130.378	127.942	139.743	133.949	128.695	140.708	133.706	122.931	106.808	57.2702	0.000780415	0.00234124	0.00702378	0.0210713	0.0632139	0.189642	0.568925	1.70678	5.12033	15.361	46.0829	Dacarbazine	NA	DNA Alkylating Agent	CN(C)/N=N/C1=C([NH]C=N1)C(N)=O
NCGC00092276-06	Y-27632	ROCK1	ROCK 1	s-ewing-osteo-TC71-1	activity	1.3	4	-7.57921	1.331	134.75	122.25	115.057	11	628.547	628.322	0.439178	0.341481	118.25	127.912	124.857	123.88	132.133	139.095	143.555	138.688	123.491	129.689	115.057	0.000780415	0.00234124	0.00702378	0.0210713	0.0632139	0.189642	0.568925	1.70678	5.12033	15.361	46.0829	Y-27632	ROCK1	ROCK 1	ROCK 2 Inhibitor	C[C@@H](N)C1CC[C@@H](CC1)C(=O)NC2=CC=NC=C2
NCGC00092284-03	AHPN	RARG	RARgamma Agonist	s-ewing-osteo-TC71-1	activity	4	-1.1	-6.22921	2.18762	7.38198	124.603	11.8083	11	372.913	373.674	0.994153	7.85e-08	120.166	120.836	128.306	123.834	131.62	115.845	64.3483	21.8096	4.84493	4.87507	11.8083	0.000780415	0.00234124	0.00702378	0.0210713	0.0632139	0.189642	0.568925	1.70678	5.12033	15.361	46.0829	AHPN	RARG	RARgamma Agonist	OC(=O)C1=CC2=CC=C(C=C2C=C1)C3=CC=C(O)C(=C3)C45CC6CC(CC(C6)C4)C5
NCGC00092288-01	(-)-Blebbistatin	MYH2	myosin II ATPase inhibitor	s-ewing-osteo-TC71-1	activity	2.1	-2.2	-4.72921	0.9	45.4943	132.674	67.4281	11	585.177	584.188	0.917714	0.00182311	135.971	130.044	134.281	122.7	129.526	140.401	130.79	122.061	105.431	102.459	67.4281	0.000780415	0.00234124	0.00702378	0.0210713	0.0632139	0.189642	0.568925	1.70678	5.12033	15.361	46.0829	(-)-Blebbistatin	MYH2	myosin II ATPase inhibitor	CC1=CC=C2\N=C/3N(CC[C@@]3(O)C(=O)C2=C1)C4=CC=CC=C4
NCGC00092289-01	DA-3003-1	CDC25	Cell Division Cycle CDC25 Phosphatase Inhibitor	s-ewing-osteo-TC71-1	activity	4	-1.1	-5.17921	2.33317	-6.96519	124.922	0.808988	11	484.43	482.149	0.992057	2.633e-07	126.199	126.727	124.302	119.423	127.623	128.513	125.74	113.966	79.5148	1.16175	0.808988	0.000780415	0.00234124	0.00702378	0.0210713	0.0632139	0.189642	0.568925	1.70678	5.12033	15.361	46.0829	DA-3003-1	CDC25	Cell Division Cycle CDC25 Phosphatase Inhibitor	ClC/1=C(NCCN2CCOCC2)/C(=O)C3=C(C=CC=N3)C1=O
NCGC00092290-03	SL-327	MAP2K1	Mek 1/2 inhibitor	s-ewing-osteo-TC71-1	activity	1.1	-2.1	-4.97921	1.34431	31.344	127.252	41.4082	11	542.46	543.064	0.990108	6.246e-07	128.168	127.735	125.692	124.002	123.777	128.069	130.575	123.013	97.5317	69.9509	41.4082	0.000780415	0.00234124	0.00702378	0.0210713	0.0632139	0.189642	0.568925	1.70678	5.12033	15.361	46.0829	SL-327	MAP2K1	Mek 1/2 inhibitor	NC(\SC1=CC=C(N)C=C1)=C(C#N)/C2=CC=CC=C2C(F)(F)F
NCGC00092310-03	Amisulpride	DRD2	Dopamine D2/D3 Antagonist	s-ewing-osteo-TC71-1	activity	5	4	NA	NA	NA	NA	109.456	11	NA	557.776	NA	NA	118.572	122.457	112.808	106.017	122.109	118.494	117.769	113.986	116.971	116.29	109.456	0.000780415	0.00234124	0.00702378	0.0210713	0.0632139	0.189642	0.568925	1.70678	5.12033	15.361	46.0829	Amisulpride	DRD2	Dopamine D2/D3 Antagonist	CCN2CCCC2CNC(=O)c1cc(c(N)cc1OC)S(=O)(=O)CC
NCGC00092314-04	Tricirbine	AKT1	PKB/Akt Inhibitor	s-ewing-osteo-TC71-1	activity	4	-2.1	-4.67921	0.6	-33.3371	129.168	7.44845	11	503.926	506.941	0.869668	0.00842534	134.903	133.406	133.3	132.511	119.519	102.418	103.576	95.444	88.3601	82.2357	7.44845	0.000780415	0.00234124	0.00702378	0.0210713	0.0632139	0.189642	0.568925	1.70678	5.12033	15.361	46.0829	Tricirbine	AKT1	PKB/Akt Inhibitor	CN4N=C(N)c2cn([C@@H]1O[C@H](CO)[C@@H](O)[C@H]1O)c3ncnc4c23
NCGC00092318-02	NSC 23766	RAC1	Rac1-GEF inhibitor	s-ewing-osteo-TC71-1	activity	1.3	4	-7.97921	4.95492	135.948	125.628	117.35	11	641.591	641.795	0.762651	0.0664528	126.448	124.931	126.457	135.967	135.244	135.787	135.11	130.029	140.526	138.391	117.35	0.000780415	0.00234124	0.00702378	0.0210713	0.0632139	0.189642	0.568925	1.70678	5.12033	15.361	46.0829	NSC 23766	RAC1	Rac1-GEF inhibitor	CCN(CC)CCCC(C)NC1=NC(=CC(=N1)C)NC2=CC3=C(N)C=C(C)N=C3C=C2
NCGC00092329-01	Eliprodil	GRIN2A	NMDA Antagonist	s-ewing-osteo-TC71-1	activity	1.3	4	-6.22921	3.92947	110.188	118.935	108.396	11	554.838	556.48	0.597275	0.172518	111.935	117.339	115.848	123.367	122.697	121.544	115.265	108.467	113.723	109.863	108.396	0.000780415	0.00234124	0.00702378	0.0210713	0.0632139	0.189642	0.568925	1.70678	5.12033	15.361	46.0829	Eliprodil	GRIN2A	NMDA Antagonist	OC(CN1CCC(CC1)CC2=CC=C(F)C=C2)C3=CC=C(Cl)C=C3
NCGC00092344-05	GW-0742	PPARD	PPARgamma Agonists?	s-ewing-osteo-TC71-1	activity	4	-2.1	-4.62921	4.09497	-5.76373	126.915	4.31764	11	566.257	566.645	0.966288	7.12723e-05	130.335	131.624	119.61	128.916	141.102	129.346	118.954	125.567	116.51	108.357	4.31764	0.000780415	0.00234124	0.00702378	0.0210713	0.0632139	0.189642	0.568925	1.70678	5.12033	15.361	46.0829	GW-0742	PPARD	PPARgamma Agonists?	CC1=CC(=CC=C1OCC(O)=O)SCC2=C(C)N=C(S2)C3=CC=C(C(=C3)F)C(F)(F)F
NCGC00092357-04	Sibutramine hydrochloride	HTR1A	5-HT Reuptake Inhibitor	s-ewing-osteo-TC71-1	activity	2.1	-3	-4.47921	4.95492	66.1219	130.697	76.5072	11	612.756	613.231	0.934662	0.000811419	127.711	129.404	136.771	131.13	133.085	136.792	130.373	127.222	121.756	130.948	76.5072	0.000780415	0.00234124	0.00702378	0.0210713	0.0632139	0.189642	0.568925	1.70678	5.12033	15.361	46.0829	Sibutramine hydrochloride	HTR1A	5-HT Reuptake Inhibitor	CC(C)CC(N(C)C)C1(CCC1)C2=CC=C(Cl)C=C2
NCGC00092360-01	Cordycepin	NA	Purine Antagonist	s-ewing-osteo-TC71-1	activity	2.1	-2.2	-4.67921	1.4641	40.0821	124.939	51.2359	11	561.287	560.738	0.91044	0.00243898	130.906	129.522	122.436	123.087	125.628	127.208	123.44	119.772	104.117	105.166	51.2359	0.000780415	0.00234124	0.00702378	0.0210713	0.0632139	0.189642	0.568925	1.70678	5.12033	15.361	46.0829	Cordycepin	NA	Purine Antagonist	NC1=NC=NC2=C1N=C[N]2[C@@H]3O[C@H](CO)C[C@H]3O
NCGC00092361-06	Dinoprostone	NA	prostaglandin	s-ewing-osteo-TC71-1	activity	2.3	-2.2	-4.72921	3.51175	100.298	131.486	98.5795	11	618.646	617.679	0.857749	0.0111287	129.986	131.877	121.904	131.139	137.2	135.558	130.027	130.526	134.751	120.01	98.5795	0.000780415	0.00234124	0.00702378	0.0210713	0.0632139	0.189642	0.568925	1.70678	5.12033	15.361	46.0829	Dinoprostone	NA	prostaglandin	O[C@@H]1CC(=O)[C@H](C/C=C\CCCC(=O)O)[C@H]1/C=C/[C@@H](O)CCCCC
NCGC00092364-05	PNU-282987	CHRNA7	Nicotinic alpha7 Agonists	s-ewing-osteo-TC71-1	activity	2.1	-2.1	-4.72921	2.33317	24.5856	132.388	32.4109	11	587.402	587.722	0.97937	1.09514e-05	130.228	129.238	131.012	128.135	140.438	133.28	136.458	136.596	120.422	92.5007	32.4109	0.000780415	0.00234124	0.00702378	0.0210713	0.0632139	0.189642	0.568925	1.70678	5.12033	15.361	46.0829	PNU-282987	CHRNA7	Nicotinic alpha7 Agonists	ClC1=CC=C(C=C1)C(=O)N[C@H]2CN3CCC2CC3
NCGC00092372-01	Necrostatin-1	RIPK1	RIP Kinase inhibitor	s-ewing-osteo-TC71-1	activity	1.3	-2.4	-6.22921	0.6	111.625	139.718	113.224	11	616.383	614.957	0.846209	0.014165	143.718	136.98	130.249	135.273	137.076	136.339	120.005	120.691	119.26	116.14	113.224	0.000780415	0.00234124	0.00702378	0.0210713	0.0632139	0.189642	0.568925	1.70678	5.12033	15.361	46.0829	Necrostatin-1	RIPK1	RIP Kinase inhibitor	CN1C(=O)C(CC2=C[NH]C3=C2C=CC=C3)NC1=S
NCGC00092375-02	JNJ-16259685	GRM1	mgluR1 Antagonists	s-ewing-osteo-TC71-1	activity	2.1	-2.1	-4.77921	1.2221	19.8152	134.328	44.2373	11	580.468	580.244	0.971643	3.70372e-05	138.168	127.676	132.97	127.76	137.882	135.394	142.636	123.927	110.347	83.0544	44.2373	0.000780415	0.00234124	0.00702378	0.0210713	0.0632139	0.189642	0.568925	1.70678	5.12033	15.361	46.0829	JNJ-16259685	GRM1	mgluR1 Antagonists	COC1CCC(CC1)C(=O)C2=CC3=C(C=C2)N=C4OCCCC4=C3
NCGC00092381-03	ABT-702	ADK	Adenosine Kinase Inhibitor	s-ewing-osteo-TC71-1	activity	2.1	-2.1	-4.67921	4.09497	21.976	135.251	30.7373	11	608.196	607.599	0.971632	3.70906e-05	140.254	140.813	136.324	135.525	141.918	131.961	132.261	131.164	123.607	112.118	30.7373	0.000780415	0.00234124	0.00702378	0.0210713	0.0632139	0.189642	0.568925	1.70678	5.12033	15.361	46.0829	ABT-702	ADK	Adenosine Kinase Inhibitor	NC1=C2C(=NC=N1)N=C(C=C2C3=CC(=CC=C3)Br)C4=CN=C(C=C4)N5CCOCC5
NCGC00092384-04	Fenobam	GRM5	mgluR5 Antagonists	s-ewing-osteo-TC71-1	activity	2.3	-2.4	-4.72921	1.66044	97.1575	132.381	103.195	11	619.228	618.577	0.826633	0.02032	135.881	132.223	126.107	127.694	136.808	132.582	139.9	126.368	129.618	117.976	103.195	0.000780415	0.00234124	0.00702378	0.0210713	0.0632139	0.189642	0.568925	1.70678	5.12033	15.361	46.0829	Fenobam	GRM5	mgluR5 Antagonists	CN1CC(=O)\N=C1\NC(=O)NC2=CC(=CC=C2)Cl
NCGC00092385-02	LY-320135	CNR1	Cannabinoid CB1 Antagonist	s-ewing-osteo-TC71-1	activity	2.3	-3	-4.42921	4.95492	85.7303	126.073	94.9178	11	597.545	598.501	0.709985	0.0820705	120.542	114.205	129.638	119.403	126.453	128.478	135.546	130.685	126.387	128.828	94.9178	0.000780415	0.00234124	0.00702378	0.0210713	0.0632139	0.189642	0.568925	1.70678	5.12033	15.361	46.0829	LY-320135	CNR1	Cannabinoid CB1 Antagonist	COC1=CC=C(C=C1)C2=C(C(=O)C3=CC=C(C=C3)C#N)C4=CC=C(OC)C=C4O2
NCGC00093347-06	Mestranol	ESR1	Estrogen Receptor (ER) Agonist	s-ewing-osteo-TC71-1	activity	4	-2.1	-4.52921	1.88512	-14.5788	127.562	20.5888	11	567.927	567.393	0.959647	0.000139761	130.487	127.665	129.23	127.182	137.593	127.871	128.414	124.501	107.796	101.881	20.5888	0.000780415	0.00234124	0.00702378	0.0210713	0.0632139	0.189642	0.568925	1.70678	5.12033	15.361	46.0829	Mestranol	ESR1	Estrogen Receptor (ER) Agonist	COC1=CC=C2[C@H]3CC[C@@]4(C)[C@@H](CC[C@@]4(O)C#C)[C@@H]3CCC2=C1
NCGC00093354-09	Niacinamide	NA	Vitamin	s-ewing-osteo-TC71-1	activity	1.3	4	-6.97921	4.95492	124.933	131.758	119.487	11	615.081	616.996	0.522785	0.240025	129.758	128.378	135.314	131.53	132.804	122.987	129.932	124.842	126.545	127.336	119.487	0.000780415	0.00234124	0.00702378	0.0210713	0.0632139	0.189642	0.568925	1.70678	5.12033	15.361	46.0829	Niacinamide	NA	Vitamin	NC(=O)C1=CC=CN=C1
NCGC00093356-08	Cytarabine	NA	DNA Polymerase Inhibitors; nucleoside	s-ewing-osteo-TC71-1	activity	4	-1.1	-7.47921	0.8	10.5374	96.5792	7.33681	11	193.028	195.388	0.981937	6.5537e-06	86.0792	95.9169	76.4889	59.6455	40.7936	25.8957	26.0272	13.7219	11.742	12.0288	7.33681	0.000780415	0.00234124	0.00702378	0.0210713	0.0632139	0.189642	0.568925	1.70678	5.12033	15.361	46.0829	Cytarabine	NA	DNA Polymerase Inhibitors; nucleoside	NC\1=N\C(=O)N(\C=C1)[C@@H]2O[C@H](CO)[C@@H](O)[C@@H]2O
NCGC00093560-06	Finasteride	AR	Androgen Receptor Antagonist	s-ewing-osteo-TC71-1	activity	4	-1.1	-5.87921	3.92947	6.39404	130.354	2.19242	11	429.16	429.894	0.996107	1.56e-08	125.769	128.462	128.07	127.847	129.454	133.173	132.863	43.1673	9.57435	4.26282	2.19242	0.000780415	0.00234124	0.00702378	0.0210713	0.0632139	0.189642	0.568925	1.70678	5.12033	15.361	46.0829	Finasteride	AR	Androgen Receptor Antagonist	CC(C)(C)NC(=O)[C@H]1CC[C@H]2[C@@H]3CC[C@H]4NC(=O)\C=C/[C@]4(C)[C@H]3CC[C@]12C
NCGC00093656-03	Brivudine	TERT	Reverse Transcriptase Inhibitor	s-ewing-osteo-TC71-1	activity	1.3	4	-8.72921	4.95492	119.019	106.019	119.442	11	567.493	567.332	0.367918	0.377863	106.019	116.069	122.597	119.626	115.939	109.493	110.906	125.268	124.543	123.03	119.442	0.000780415	0.00234124	0.00702378	0.0210713	0.0632139	0.189642	0.568925	1.70678	5.12033	15.361	46.0829	Brivudine	TERT	Reverse Transcriptase Inhibitor	OC[C@H]1O[C@H](C[C@@H]1O)N2/C=C(/C=C/Br)C(=O)NC2=O
NCGC00093704-11	Cyclosporine A	NA	immunosuppressant; inhibits of T cell immune response/celcineurin	s-ewing-osteo-TC71-1	activity	2.1	-3	-4.62921	4.09497	80.7696	124.534	83.5414	11	584.149	584.202	0.951343	0.000279639	119.534	123.302	125.765	123.633	123.994	128.65	122.794	129.274	122.319	116.959	83.5414	0.000780415	0.00234124	0.00702378	0.0210713	0.0632139	0.189642	0.568925	1.70678	5.12033	15.361	46.0829	Cyclosporine A	NA	immunosuppressant; inhibits of T cell immune response/celcineurin	CCC1NC(=O)C(C(O)C(C)C\C=C\C)N(C)C(=O)C(C(C)C)N(C)C(=O)C(CC(C)C)N(C)C(=O)C(CC(C)C)N(C)C(=O)C(C)NC(=O)C(C)NC(=O)C(CC(C)C)N(C)C(=O)C(NC(=O)C(CC(C)C)N(C)C(=O)CN(C)C1=O)C(C)C
NCGC00093706-05	Cephalexin	NA	Cephalosporin antibiotic	s-ewing-osteo-TC71-1	activity	1.3	1.4	-8.12921	1.50949	127.675	110.071	126.537	11	596.263	596.294	0.774114	0.0431771	111.675	110.338	121.189	120.672	132.49	123.937	124.181	126.932	127.633	133.898	126.537	0.000780415	0.00234124	0.00702378	0.0210713	0.0632139	0.189642	0.568925	1.70678	5.12033	15.361	46.0829	Cephalexin	NA	Cephalosporin antibiotic	CC/1=C(/N2[C@H](SC1)[C@H](NC(=O)C(N)C3=CC=CC=C3)C2=O)C(O)=O
NCGC00093802-08	Dehydroepiandrosterone	NA	Steroid hormone	s-ewing-osteo-TC71-1	activity	4	-2.1	-4.72921	1.50949	11.1966	125.174	25.3962	11	545.019	543.413	0.935083	0.000792263	126.822	129.204	125.686	113.991	127.5	124.982	135.247	118.732	98.0358	87.567	25.3962	0.000780415	0.00234124	0.00702378	0.0210713	0.0632139	0.189642	0.568925	1.70678	5.12033	15.361	46.0829	Dehydroepiandrosterone	NA	Steroid hormone	C[C@]12CC[C@H]3[C@@H](C\C=C/4C[C@@H](O)CC[C@]34C)[C@@H]1CCC2=O
NCGC00093926-04	Doxifluridine	TYMS	thymidylate synthase inhibitor	s-ewing-osteo-TC71-1	activity	1.1	-2.2	-4.82921	1.24751	43.3002	134.099	60.6643	11	589.589	591.176	0.939063	0.000631886	126.599	129.195	144.21	135.753	133.887	137.978	135.341	116.757	121.398	86.3925	60.6643	0.000780415	0.00234124	0.00702378	0.0210713	0.0632139	0.189642	0.568925	1.70678	5.12033	15.361	46.0829	Doxifluridine	TYMS	thymidylate synthase inhibitor	C[C@H]1O[C@H]([C@H](O)[C@@H]1O)N2\C=C(F)/C(=O)NC2=O
NCGC00093976-06	Idarubicin hydrochloride	TOP2A	DNA Topoisomerase II Inhibitors	s-ewing-osteo-TC71-1	activity	4	-1.1	-7.42921	2.84727	4.39975	134.811	2.21256	11	239.988	238.706	0.997741	1.8e-09	138.912	133.494	127.055	116.371	29.7546	6.14167	6.2882	3.95225	3.3812	3.13989	2.21256	0.000780415	0.00234124	0.00702378	0.0210713	0.0632139	0.189642	0.568925	1.70678	5.12033	15.361	46.0829	Idarubicin hydrochloride	TOP2A	DNA Topoisomerase II Inhibitors	C[C@@H]1O[C@H](C[C@H](N)[C@@H]1O)O[C@H]2C[C@@](O)(CC3=C(O)C4=C(C(=C23)O)C(=O)C5=C(C=CC=C5)C4=O)C(C)=O
NCGC00093985-10	Metolazone	CA7	Carbonic Anhydrase Type VII Inhibitor	s-ewing-osteo-TC71-1	activity	1.3	4	-6.57921	4.95492	131.23	143.548	128.822	11	662.259	663.533	0.663907	0.116417	138.548	146.948	142.402	143.479	145.659	141.962	126.199	141.979	129.137	129.684	128.822	0.000780415	0.00234124	0.00702378	0.0210713	0.0632139	0.189642	0.568925	1.70678	5.12033	15.361	46.0829	Metolazone	CA7	Carbonic Anhydrase Type VII Inhibitor	CC1NC2=CC(=C(C=C2C(=O)N1C3=C(C)C=CC=C3)[S+](N)([O-])=O)Cl
NCGC00094087-06	Mizoribine	IMPDH1	Inosine 5'-Monophosphate Dehydrogenase (IMPDH) Inhibitors	s-ewing-osteo-TC71-1	activity	2.3	4	-4.72921	0.9	117.705	142.828	122.559	11	671.383	673.396	0.588733	0.179395	136.828	153.587	144.816	138.778	141.543	138.414	146.145	139.919	133.005	136.369	122.559	0.000780415	0.00234124	0.00702378	0.0210713	0.0632139	0.189642	0.568925	1.70678	5.12033	15.361	46.0829	Mizoribine	IMPDH1	Inosine 5'-Monophosphate Dehydrogenase (IMPDH) Inhibitors	NC(=O)C1=C(O)[N](C=N1)[C@@H]2O[C@H](CO)[C@@H](O)[C@H]2O
NCGC00094112-06	BIO	GSK3B	GSK-3 inhibitor	s-ewing-osteo-TC71-1	activity	4	-2.1	-5.12921	1.62662	-10.1478	138.315	1.1528	11	539.686	545.039	0.973529	2.84892e-05	132.555	137.441	125.812	137.067	140.306	145.149	137.679	141.826	77.2457	32.8843	1.1528	0.000780415	0.00234124	0.00702378	0.0210713	0.0632139	0.189642	0.568925	1.70678	5.12033	15.361	46.0829	BIO	GSK3B	GSK-3 inhibitor	O\N=C1\C(NC2=CC=CC=C12)=C3\C(=O)NC4=CC(=CC=C34)Br
NCGC00094201-01	Masoprocol	ALOX5	5-Lipoxygenase Inhibitor	s-ewing-osteo-TC71-1	activity	1.1	-2.1	-4.87921	1.1341	40.221	142.968	59.6579	11	619.163	620.378	0.961159	0.000121232	136.113	141.716	139.797	138.719	147.255	152.573	136.98	140.199	110.076	90.6212	59.6579	0.000780415	0.00234124	0.00702378	0.0210713	0.0632139	0.189642	0.568925	1.70678	5.12033	15.361	46.0829	Masoprocol	ALOX5	5-Lipoxygenase Inhibitor	C[C@H](CC1=CC=C(O)C(=C1)O)[C@@H](C)CC2=CC(=C(O)C=C2)O
NCGC00094226-11	Piceatannol	SYK	Syk Kinase inhibitor	s-ewing-osteo-TC71-1	activity	2.1	-2.1	-4.72921	2.33317	32.4176	116.357	34.0886	11	521.178	521.223	0.962002	0.000111705	117.639	113.324	116.648	121.915	119.883	119.719	114.252	109.194	108.074	91.0279	34.0886	0.000780415	0.00234124	0.00702378	0.0210713	0.0632139	0.189642	0.568925	1.70678	5.12033	15.361	46.0829	Piceatannol	SYK	Syk Kinase inhibitor	OC1=CC(=CC(=C1)/C=C/C2=CC(=C(O)C=C2)O)O
NCGC00094358-17	Isotretinoin	RARB	Retinoid RAR Agonists? Retinoid RORbeta Ligand	s-ewing-osteo-TC71-1	activity	1.1	-1.2	-5.32921	3.51175	57.6144	114.677	52.2024	11	492.275	494.993	0.916804	0.00189342	105.018	103.932	110.322	119.452	125.37	112.611	119.074	118.6	80.6472	64.961	52.2024	0.000780415	0.00234124	0.00702378	0.0210713	0.0632139	0.189642	0.568925	1.70678	5.12033	15.361	46.0829	Isotretinoin	RARB	Retinoid RAR Agonists? Retinoid RORbeta Ligand	CC/1=C(\C=C\C(C)=C\C=C\C(C)=C/C(O)=O)C(C)(C)CCC1
NCGC00094374-05	Seliciclib	CDK1	CDK 1	s-ewing-osteo-TC71-1	activity	4	-2.1	-4.67921	1.88512	8.38878	135.009	18.0456	11	594.423	591.282	0.948614	0.000340752	138.756	142.94	142.47	135.933	135.977	131.15	129.867	124.751	116.247	100.192	18.0456	0.000780415	0.00234124	0.00702378	0.0210713	0.0632139	0.189642	0.568925	1.70678	5.12033	15.361	46.0829	Seliciclib	CDK1	CDK 1	2	5	7	9 Inhibitor	CC[C@H](CO)NC1=NC(=C2N=C[N](C(C)C)C2=N1)NCC3=CC=CC=C3
NCGC00094419-06	TPCK	NA	Cysteine Protease Inhibitor	s-ewing-osteo-TC71-1	activity	4	-2.1	-4.72921	2.72022	6.44544	115.561	2.34263	11	507.026	505.631	0.960842	0.000124948	104.519	118.077	109.247	115.162	123.377	115.514	125.033	113.023	110.953	75.7623	2.34263	0.000780415	0.00234124	0.00702378	0.0210713	0.0632139	0.189642	0.568925	1.70678	5.12033	15.361	46.0829	TPCK	NA	Cysteine Protease Inhibitor	CC1=CC=C(C=C1)[S+]([O-])(=O)N[C@@H](CC2=CC=CC=C2)C(=O)CCl
NCGC00094552-04	Pyrantel pamoate	NA	antiparasitic agent	s-ewing-osteo-TC71-1	activity	1.3	4	-5.57921	4.95492	121.818	129.866	122.623	11	614.072	614.209	0.868623	0.00880602	127.866	127.851	132.834	129.971	131.582	129.377	129.787	129.201	121.16	121.21	122.623	0.000780415	0.00234124	0.00702378	0.0210713	0.0632139	0.189642	0.568925	1.70678	5.12033	15.361	46.0829	Pyrantel pamoate	NA	antiparasitic agent	CN1CCC/N=C1/C=C/C2=CC=CS2.OC(=O)C3=CC4=CC=CC=C4C(=C3O)CC5=C(O)C(=CC6=CC=CC=C56)C(O)=O
NCGC00094571-07	Crotamiton	NA	antipruritic	s-ewing-osteo-TC71-1	activity	2.1	-3	-4.42921	4.95492	81.1985	130.392	92.7862	11	616.451	617.813	0.925286	0.00130498	128.998	129.57	133.883	134.91	128.426	125.481	130.602	126.734	134.299	133.188	92.7862	0.000780415	0.00234124	0.00702378	0.0210713	0.0632139	0.189642	0.568925	1.70678	5.12033	15.361	46.0829	Crotamiton	NA	antipruritic	CCN(C(=O)\C=C\C)C1=CC=CC=C1C
NCGC00094575-01	Tolterodine tartrate	NA	Muscarinic M3 Antagonists	s-ewing-osteo-TC71-1	activity	2.3	4	-4.67921	4.50447	95.2964	114.099	95.9301	11	541.624	542.752	0.534457	0.22807	111.599	106.752	108.378	114.956	107.425	119.944	118.773	119.873	120.267	110.3	95.9301	0.000780415	0.00234124	0.00702378	0.0210713	0.0632139	0.189642	0.568925	1.70678	5.12033	15.361	46.0829	Tolterodine tartrate	NA	Muscarinic M3 Antagonists	Cl.CC(C)N(CCC(C1=CC=CC=C1)C2=CC(=CC=C2O)C)C(C)C
NCGC00094580-05	Allopurinol	XDH	Xanthine Oxidase Inhibitor	s-ewing-osteo-TC71-1	activity	1.3	4	-8.32921	4.95492	122.001	112.076	126.617	11	578.896	577.091	0.428158	0.325153	115.001	109.647	121.582	122.26	117.026	120.247	120.076	131.539	116.318	120.621	126.617	0.000780415	0.00234124	0.00702378	0.0210713	0.0632139	0.189642	0.568925	1.70678	5.12033	15.361	46.0829	Allopurinol	XDH	Xanthine Oxidase Inhibitor	O=C1N\C=N/C2=C1C=N[NH]2
NCGC00094717-05	6-mercaptopurine	HPRT1	Purine Antagonist	s-ewing-osteo-TC71-1	activity	4	-1.1	-5.72921	2.04786	8.94984	119.225	7.80709	11	415.562	414.831	0.996958	5.9e-09	122.082	115.082	119.848	121.781	118.701	118.268	107.854	70.0408	17.7991	14.5481	7.80709	0.000780415	0.00234124	0.00702378	0.0210713	0.0632139	0.189642	0.568925	1.70678	5.12033	15.361	46.0829	6-mercaptopurine	HPRT1	Purine Antagonist	S=C1N\C=N/C2=C1[NH]C=N2
NCGC00094763-03	Polymyxin B sulphate	NA	Peptide Antibiotic	s-ewing-osteo-TC71-1	activity	1.3	4	-6.67921	1	144.706	128.706	124.179	11	656.698	656.835	0.567695	0.226092	124.706	130.859	132.022	137.234	127.013	133.303	141.588	153.221	142.6	137.506	124.179	0.000780415	0.00234124	0.00702378	0.0210713	0.0632139	0.189642	0.568925	1.70678	5.12033	15.361	46.0829	Polymyxin B sulphate	NA	Peptide Antibiotic	CCC(C)CCCCC(=O)N[C@@H](CCN)C(=O)NC([C@@H](C)O)C(=O)N[C@H](CCN)C(=O)N[C@@H]1CCNC(=O)C(NC(=O)[C@@H](CCN)NC(=O)[C@@H](CCN)NC(=O)[C@@H](CC(C)C)NC(=O)[C@H](CC2=CC=CC=C2)NC(=O)[C@H](CCN)NC1=O)[C@@H](C)O
NCGC00094792-06	Tioguanine	NA	Purine Antagonist	s-ewing-osteo-TC71-1	activity	4	-1.1	-6.02921	3.67725	4.34629	115.192	2.0141	11	362.49	364.832	0.995835	2.04e-08	108.023	116.486	114.683	121.51	115.669	116.227	99.3043	13.926	8.65148	3.02579	2.0141	0.000780415	0.00234124	0.00702378	0.0210713	0.0632139	0.189642	0.568925	1.70678	5.12033	15.361	46.0829	Tioguanine	NA	Purine Antagonist	NC/1=N/C2=C([NH]C=N2)C(=S)N1
NCGC00094810-06	Warfarin sodium	VKORC1	Vitamin K Epoxide Reductase (VKER	s-ewing-osteo-TC71-1	activity	1.3	1.4	-8.47921	0.9641	113.505	90.0047	117.875	11	528.308	527.183	0.76176	0.0498022	94.0047	99.8547	106.389	108.19	116.584	111.369	105.237	112.602	111.728	118.276	117.875	0.000780415	0.00234124	0.00702378	0.0210713	0.0632139	0.189642	0.568925	1.70678	5.12033	15.361	46.0829	Warfarin sodium	VKORC1	Vitamin K Epoxide Reductase (VKER	VKOR) Inhibitor	CC(=O)CC(C1=CC=CC=C1)C/2=C(O)/C3=CC=CC=C3OC2=O
NCGC00094818-08	Hexestrol	AKR1C1	17-betahydroxysteroid dehydrogenase inhibitor	s-ewing-osteo-TC71-1	activity	1.1	-1.2	-5.97921	4.95492	60.1383	122.706	55.0322	11	484.193	486.92	0.979008	1.17116e-05	116.206	123.856	115.637	126.647	127.988	122.043	124.693	64.2925	63.7479	61.9271	55.0322	0.000780415	0.00234124	0.00702378	0.0210713	0.0632139	0.189642	0.568925	1.70678	5.12033	15.361	46.0829	Hexestrol	AKR1C1	17-betahydroxysteroid dehydrogenase inhibitor	CCC(C(CC)C1=CC=C(O)C=C1)C2=CC=C(O)C=C2
NCGC00094872-08	Piperine	MAOA	MAO-A/B Inhibitor	s-ewing-osteo-TC71-1	activity	1.3	4	-5.27921	1.37226	111.716	130.742	114.507	11	609.502	609.119	0.747018	0.0583013	129.242	123.914	129.407	135.02	131.861	132.434	134.175	122.045	125.283	112.137	114.507	0.000780415	0.00234124	0.00702378	0.0210713	0.0632139	0.189642	0.568925	1.70678	5.12033	15.361	46.0829	Piperine	MAOA	MAO-A/B Inhibitor	O=C(\C=C\C=C\C1=CC=C2OCOC2=C1)N3CCCCC3
NCGC00094889-05	Fumalic acid	NA	Free Radical Scavenger	s-ewing-osteo-TC71-1	activity	2.1	-3	-4.47921	4.95492	32.539	122.944	47.2116	11	569.304	571.399	0.957242	0.000173338	118.063	113.577	123.409	124.038	117.902	125.376	127.911	129.607	127.054	122.578	47.2116	0.000780415	0.00234124	0.00702378	0.0210713	0.0632139	0.189642	0.568925	1.70678	5.12033	15.361	46.0829	Fumalic acid	NA	Free Radical Scavenger	COC1=CC(=CC=C1O)/C=C/C(O)=O
NCGC00094927-01	Flunisolide	NA	Corticosteroid	s-ewing-osteo-TC71-1	activity	2.3	-3	-4.52921	4.95492	82.6479	123.061	86.6985	11	580.816	582.145	0.746063	0.0587092	120.006	112.538	125.283	121.181	119.617	118.347	132.511	123.866	135.59	121.396	86.6985	0.000780415	0.00234124	0.00702378	0.0210713	0.0632139	0.189642	0.568925	1.70678	5.12033	15.361	46.0829	Flunisolide	NA	Corticosteroid	CC1(C)OC2CC3C4CC(F)C/5=C/C(=O)/C=C\C5(C)C4C(O)CC3(C)[C@@]2(O1)C(=O)CO
NCGC00094994-06	Mefloquine	NA	antimalarial agents; Inhibtion of heme crystallization	s-ewing-osteo-TC71-1	activity	4	-2.1	-4.67921	4.50447	-2.94175	123.334	5.13109	11	547.099	552.821	0.956203	0.000189392	105.614	128.867	122.216	119.963	121.417	131.697	131.329	129.846	118.432	99.1369	5.13109	0.000780415	0.00234124	0.00702378	0.0210713	0.0632139	0.189642	0.568925	1.70678	5.12033	15.361	46.0829	Mefloquine	NA	antimalarial agents; Inhibtion of heme crystallization	OC(C1CCCCN1)C2=C3C=CC=C(C3=NC(=C2)C(F)(F)F)C(F)(F)F
NCGC00095003-06	Tioxolone	CA1	Carbonic Anhydrase Type I Inhibitor	s-ewing-osteo-TC71-1	activity	2.1	-2.2	-4.72921	2.33317	67.7746	139.285	69.2575	11	637.03	636.004	0.957523	0.000169184	143.402	142.834	136.178	145.426	139.569	138.657	134.904	131.931	136.527	115.504	69.2575	0.000780415	0.00234124	0.00702378	0.0210713	0.0632139	0.189642	0.568925	1.70678	5.12033	15.361	46.0829	Tioxolone	CA1	Carbonic Anhydrase Type I Inhibitor	OC1=CC2=C(SC(=O)O2)C=C1
NCGC00095023-04	Ethisterone	PGR	Progestogen hormone	s-ewing-osteo-TC71-1	activity	5	4	NA	NA	NA	NA	119.15	11	NA	583.07	NA	NA	121.433	116.73	120.351	125.612	127.229	117.837	123.515	123.159	116.277	122.207	119.15	0.000780415	0.00234124	0.00702378	0.0210713	0.0632139	0.189642	0.568925	1.70678	5.12033	15.361	46.0829	Ethisterone	PGR	Progestogen hormone	CC\12CCC(=O)\C=C1CCC3C2CCC4(C)C3CCC4(O)C#C
NCGC00095042-08	ThioTEPA	NA	Cytochrome P450 Oxidase Inhibitor	s-ewing-osteo-TC71-1	activity	4	-2.1	-4.77921	1	-17.2561	128.216	13.1461	11	527.391	526.641	0.933723	0.000852851	130.078	126.855	128.48	127.891	124.02	120.643	137.273	118.045	74.2532	73.7401	13.1461	0.000780415	0.00234124	0.00702378	0.0210713	0.0632139	0.189642	0.568925	1.70678	5.12033	15.361	46.0829	ThioTEPA	NA	Cytochrome P450 Oxidase Inhibitor	S=[P](N1CC1)(N2CC2)N3CC3
NCGC00095055-03	Salinomycin	WNT1	Anticoccidial/Antibacterial	s-ewing-osteo-TC71-1	activity	4	-1.1	-5.82921	0.9	-1.91533	125.584	3.7996	11	406.133	408.304	0.989253	8.649e-07	118.098	124.432	128.571	124.795	117.932	118.239	81.7416	55.2305	35.11	8.48325	3.7996	0.000780415	0.00234124	0.00702378	0.0210713	0.0632139	0.189642	0.568925	1.70678	5.12033	15.361	46.0829	Salinomycin	WNT1	Anticoccidial/Antibacterial	CCC(C1CCC(C)C(O1)C(C)C(O)C(C)C(=O)C(CC)C2OC\3(O[C@]4(CC[C@@](C)(O4)C5CC[C@@](O)(CC)C(C)O5)C(O)\C=C3)C(C)CC2C)C([O-])=O
NCGC00095089-11	Fluconazole	NA	Antifungal Agent	s-ewing-osteo-TC71-1	activity	2.3	4	-4.67921	0.8	102.443	130.27	110.664	11	609.319	606.095	0.512069	0.248343	134.27	116.29	131.561	124.257	136.64	131.656	131.395	125.604	121.266	120.962	110.664	0.000780415	0.00234124	0.00702378	0.0210713	0.0632139	0.189642	0.568925	1.70678	5.12033	15.361	46.0829	Fluconazole	NA	Antifungal Agent	OC(C[N]1C=NC=N1)(C[N]2C=NC=N2)C3=CC=C(F)C=C3F
NCGC00095099-04	Sildenafil citrate	PDE5A	Phosphodiesterase V (PDE5) inhibitor	s-ewing-osteo-TC71-1	activity	1.1	-2.2	-4.87921	0.7	55.4821	125.495	72.3336	11	547.926	548.925	0.922965	0.00145031	126.557	119.631	124.234	127.068	132.952	118.963	118.706	104.528	106.488	93.1058	72.3336	0.000780415	0.00234124	0.00702378	0.0210713	0.0632139	0.189642	0.568925	1.70678	5.12033	15.361	46.0829	Sildenafil citrate	PDE5A	Phosphodiesterase V (PDE5) inhibitor	CCCC1=N[N](C)C2=C1\N=C(/NC2=O)C3=CC(=CC=C3OCC)[S+]([O-])(=O)N4CCN(C)CC4
NCGC00095107-10	Gliclazide	NA	K(ATP) Channel Blockers	s-ewing-osteo-TC71-1	activity	2.1	-2.2	-4.77921	3.06545	82.0175	126.392	82.5539	11	585.99	587.328	0.912819	0.00222655	125.046	126.882	121.55	119.629	125.249	130.25	135.635	128.295	125.082	108.48	82.5539	0.000780415	0.00234124	0.00702378	0.0210713	0.0632139	0.189642	0.568925	1.70678	5.12033	15.361	46.0829	Gliclazide	NA	K(ATP) Channel Blockers	CC1=CC=C(C=C1)[S+]([O-])(=O)NC(=O)NN2CC3CCCC3C2
NCGC00095109-06	Venlafaxine hydrochloride	HTR1A	5-HT Reuptake Inhibitor	s-ewing-osteo-TC71-1	activity	2.3	4	-4.62921	4.50447	100.597	126.581	101.845	11	600.026	601.368	0.690141	0.0963271	125.581	120.035	133.817	129.308	127.555	127.291	132.743	116.35	128.866	123.169	101.845	0.000780415	0.00234124	0.00702378	0.0210713	0.0632139	0.189642	0.568925	1.70678	5.12033	15.361	46.0829	Venlafaxine hydrochloride	HTR1A	5-HT Reuptake Inhibitor	COC1=CC=C(C=C1)C(CN(C)C)C2(O)CCCCC2
NCGC00095112-04	Avobenzone	NA	UVA ray absorber	s-ewing-osteo-TC71-1	activity	4	-1.1	-5.77921	3.06545	6.33961	124.703	5.85926	11	424.351	424.593	0.995719	2.28e-08	125.946	118.628	120.985	125.338	125.092	130.105	124.883	59.3885	12.7155	6.43168	5.85926	0.000780415	0.00234124	0.00702378	0.0210713	0.0632139	0.189642	0.568925	1.70678	5.12033	15.361	46.0829	Avobenzone	NA	UVA ray absorber	COC1=CC=C(C=C1)C(=O)CC(=O)C2=CC=C(C=C2)C(C)(C)C
NCGC00095118-05	Rofecoxib	PTGS2	Cyclooxygenase-2 Inhibitor	s-ewing-osteo-TC71-1	activity	2.1	-2.1	-4.72921	4.09497	29.8843	136.092	36.385	11	609.733	613.448	0.957924	0.000163256	121.805	136.346	131.496	132.267	141.821	132.435	142.014	141.094	142.218	104.24	36.385	0.000780415	0.00234124	0.00702378	0.0210713	0.0632139	0.189642	0.568925	1.70678	5.12033	15.361	46.0829	Rofecoxib	PTGS2	Cyclooxygenase-2 Inhibitor	C[S+]([O-])(=O)C1=CC=C(C=C1)C/2=C(/C(=O)OC2)C3=CC=CC=C3
NCGC00095124-06	Rosiglitazone	PPARG	PPARgamma Agonists?	s-ewing-osteo-TC71-1	activity	1.3	-2.2	-4.97921	0.6	98.2939	150.229	111.922	11	674.306	672.64	0.805585	0.0283218	154.51	154.725	147.381	148.839	138.964	142.597	146.265	130.889	143.072	115.527	111.922	0.000780415	0.00234124	0.00702378	0.0210713	0.0632139	0.189642	0.568925	1.70678	5.12033	15.361	46.0829	Rosiglitazone	PPARG	PPARgamma Agonists?	CN(CCOC1=CC=C(CC2SC(=O)NC2=O)C=C1)C3=CC=CC=N3
NCGC00095128-04	Orlistat	FAS	Fatty acid synthase inhibitor	s-ewing-osteo-TC71-1	activity	1.3	1.4	-7.97921	0.5	136.192	114.692	134.259	11	626.055	626.651	0.78025	0.0400899	118.192	123.402	122.051	131.362	129.094	125.03	136.641	136.865	138.208	134.551	134.259	0.000780415	0.00234124	0.00702378	0.0210713	0.0632139	0.189642	0.568925	1.70678	5.12033	15.361	46.0829	Orlistat	FAS	Fatty acid synthase inhibitor	CCCCCCCCCCCC(CC1OC(=O)C1CCCCCC)OC(=O)C(CC(C)C)NC=O
NCGC00095133-04	Famciclovir	NA	antiviral	s-ewing-osteo-TC71-1	activity	1.3	4	-8.12921	0.4	119.816	103.816	120.599	11	554.792	554.979	0.823817	0.0215762	105.816	112.076	113.536	111.206	116.847	114.013	118.638	116.703	119.331	118.669	120.599	0.000780415	0.00234124	0.00702378	0.0210713	0.0632139	0.189642	0.568925	1.70678	5.12033	15.361	46.0829	Famciclovir	NA	antiviral	CC(=O)OCC(CC[N]1C=NC2=CN=C(N)N=C12)COC(C)=O
NCGC00095134-03	Ezetimibe	NPC1L1	NPC1L1 Inhibitor	s-ewing-osteo-TC71-1	activity	2.3	-2.4	-4.67921	4.50447	103.812	129.188	104.541	11	611.772	612.5	0.830188	0.0191388	125.688	133.497	125.663	130.013	123.043	128.302	133.976	131.237	130.945	124.185	104.541	0.000780415	0.00234124	0.00702378	0.0210713	0.0632139	0.189642	0.568925	1.70678	5.12033	15.361	46.0829	Ezetimibe	NPC1L1	NPC1L1 Inhibitor	OC(CCC1C(N(C1=O)C2=CC=C(F)C=C2)C3=CC=C(O)C=C3)C4=CC=C(F)C=C4
NCGC00095135-04	Almotriptan	HTR1B	5-HT1B Agonist	s-ewing-osteo-TC71-1	activity	1.1	1.4	-7.12921	0.3	142.753	111.753	119.305	11	620.567	621.128	0.912908	0.00436104	115.253	122.148	125.017	123.472	124.436	131.606	129.458	134.551	135.691	138.362	119.305	0.000780415	0.00234124	0.00702378	0.0210713	0.0632139	0.189642	0.568925	1.70678	5.12033	15.361	46.0829	Almotriptan	HTR1B	5-HT1B Agonist	CN(C)CCC1=C[NH]C2=CC=C(C[S+]([O-])(=O)N3CCCC3)C=C12
NCGC00095145-01	Cantharidin	PPP1CA	PP-1 Inhibitors;PP-2A Inhibitors	s-ewing-osteo-TC71-1	activity	4	-1.1	-5.37921	2.40638	0.111049	125.261	0.368597	11	466.909	466.396	0.997167	4.4e-09	129.143	119.745	124.852	125.799	129.758	124.664	121.91	112.81	47.0165	6.18173	0.368597	0.000780415	0.00234124	0.00702378	0.0210713	0.0632139	0.189642	0.568925	1.70678	5.12033	15.361	46.0829	Cantharidin	PPP1CA	PP-1 Inhibitors;PP-2A Inhibitors	C[C@]12C3CCC(O3)[C@]1(C)C(=O)OC2=O
NCGC00095150-07	Telmisartan	AGT	Angiotensin AT1 Antagonist	s-ewing-osteo-TC71-1	activity	2.1	-3	-4.47921	4.95492	44.6023	123.946	57.5162	11	576.769	579.839	0.918946	0.0017304	111.652	116.832	122.642	122.315	124.121	133.383	130.185	127.525	125.583	123.845	57.5162	0.000780415	0.00234124	0.00702378	0.0210713	0.0632139	0.189642	0.568925	1.70678	5.12033	15.361	46.0829	Telmisartan	AGT	Angiotensin AT1 Antagonist	CCCC1=NC2=C(C=C(C=C2C)C3=NC4=CC=CC=C4[N]3C)[N]1CC5=CC=C(C=C5)C6=CC=CC=C6C(O)=O
NCGC00095152-07	Alfuzosin hydrochloride	ADRA1A	alpha1-Adrenoceptor Antagonists	s-ewing-osteo-TC71-1	activity	2.3	4	-4.57921	4.95492	97.2482	109.245	97.9144	11	521.64	524.089	0.328685	0.411335	101.245	109.698	106.808	114.489	110.326	101.352	114.761	116.455	109.327	108.372	97.9144	0.000780415	0.00234124	0.00702378	0.0210713	0.0632139	0.189642	0.568925	1.70678	5.12033	15.361	46.0829	Alfuzosin hydrochloride	ADRA1A	alpha1-Adrenoceptor Antagonists	COC1=CC2=C(C=C1OC)C(=NC(=N2)N(C)CCCNC(=O)C3CCCO3)N
NCGC00095157-06	Oxfendazole	NA	antiparasitic agent	s-ewing-osteo-TC71-1	activity	2.1	-2.1	-4.72921	3.132	31.4824	116.43	32.792	11	522.656	522.172	0.959729	0.000138726	109.43	115.361	117.861	119.174	109.169	126.246	114.686	113.861	121.581	82.9371	32.792	0.000780415	0.00234124	0.00702378	0.0210713	0.0632139	0.189642	0.568925	1.70678	5.12033	15.361	46.0829	Oxfendazole	NA	antiparasitic agent	COC(=O)NC1=NC2=CC=C(C=C2[NH]1)[S+]([O-])C3=CC=CC=C3
NCGC00095158-05	Secnidazole	NA	antiprotozoal agent	s-ewing-osteo-TC71-1	activity	2.3	-3	-4.42921	4.95492	85.2397	127.414	95.1263	11	603.605	605.336	0.63243	0.141618	121.62	125.104	114.524	121.272	130.666	136.355	129.304	141.006	124.03	131.028	95.1263	0.000780415	0.00234124	0.00702378	0.0210713	0.0632139	0.189642	0.568925	1.70678	5.12033	15.361	46.0829	Secnidazole	NA	antiprotozoal agent	CC(O)C[N]1C(=NC=C1[N+]([O-])=O)C
NCGC00095161-04	Rebamipide	NA	Free Radical Scavenger	s-ewing-osteo-TC71-1	activity	2.3	-3	-4.42921	4.95492	64.3063	120.502	77.1842	11	567.449	569.142	0.780244	0.0399106	112.05	114.38	112.566	119.649	119.852	123.987	117.442	124.907	136.232	123.502	77.1842	0.000780415	0.00234124	0.00702378	0.0210713	0.0632139	0.189642	0.568925	1.70678	5.12033	15.361	46.0829	Rebamipide	NA	Free Radical Scavenger	OC(=O)C(CC/1=C/C(=O)NC2=CC=CC=C12)NC(=O)C3=CC=C(Cl)C=C3
NCGC00095164-05	Protionamide	NA	tuberculosis treatment	s-ewing-osteo-TC71-1	activity	1.3	1.4	-8.42921	0.9	128.323	109.323	130.501	11	601.788	601.512	0.842109	0.0154295	111.323	117.082	123.941	121.144	129.88	123.679	129.751	129.147	128.442	127.042	130.501	0.000780415	0.00234124	0.00702378	0.0210713	0.0632139	0.189642	0.568925	1.70678	5.12033	15.361	46.0829	Protionamide	NA	tuberculosis treatment	CCCC1=CC(=CC=N1)C(N)=S
NCGC00095165-05	Carmofur	NA	Pyrimidine Antagonists	s-ewing-osteo-TC71-1	activity	1.1	-2.1	-5.07921	1.21	42.5694	135.986	53.5995	11	576.84	575.296	0.982003	6.4616e-06	139.772	133.199	131.649	141.459	140.524	127.252	131.382	124.617	102.818	72.199	53.5995	0.000780415	0.00234124	0.00702378	0.0210713	0.0632139	0.189642	0.568925	1.70678	5.12033	15.361	46.0829	Carmofur	NA	Pyrimidine Antagonists	CCCCCCNC(=O)N1\C=C(F)/C(=O)NC1=O
NCGC00095188-04	Pantoprazole	NA	H+/K+-ATPase Inhibitor	s-ewing-osteo-TC71-1	activity	1.3	4	-6.92921	2.30312	133.463	121.752	116.401	11	616.002	614.779	0.7711	0.0608659	122.463	116.871	125.269	122.142	124.59	130.058	135.278	137.878	129.535	130.642	116.401	0.000780415	0.00234124	0.00702378	0.0210713	0.0632139	0.189642	0.568925	1.70678	5.12033	15.361	46.0829	Pantoprazole	NA	H+/K+-ATPase Inhibitor	COC1=C(OC)C(=NC=C1)C[S+]([O-])C2=NC3=CC(=CC=C3[NH]2)OC(F)F
NCGC00095192-06	Tegaserod maleate	HTR4	5-HT4 Partial Agonists	s-ewing-osteo-TC71-1	activity	4	-2.1	-4.97921	2.90227	25.0833	122.312	24.7245	11	521.372	523.042	0.979243	1.12142e-05	114.418	125.137	119.401	128.033	114.792	121.108	123.687	129.976	111.084	51.6196	24.7245	0.000780415	0.00234124	0.00702378	0.0210713	0.0632139	0.189642	0.568925	1.70678	5.12033	15.361	46.0829	Tegaserod maleate	HTR4	5-HT4 Partial Agonists	CCCCCNC(=N)N/N=C/C1=C[NH]C2=C1C=C(OC)C=C2
NCGC00095245-01	Testosterone propionate	AR	Androgen Receptor Agonist	s-ewing-osteo-TC71-1	activity	1.3	4	-7.67921	1.88512	130.772	119.124	121.656	11	611.929	611.206	0.770971	0.0610251	122.272	117.149	118.737	125.583	129.945	127.848	128.547	135.443	127.127	133.087	121.656	0.000780415	0.00234124	0.00702378	0.0210713	0.0632139	0.189642	0.568925	1.70678	5.12033	15.361	46.0829	Testosterone propionate	AR	Androgen Receptor Agonist	CCC(=O)OC1CCC2C3CCC/4=C/C(=O)CC[C@@]4(C)C3CC[C@]12C
NCGC00095264-05	Chloroxine	NA	Antibacterial	s-ewing-osteo-TC71-1	activity	4	-1.1	-4.97921	3.06545	7.99962	121.488	8.22859	11	506.251	505.626	0.974554	2.45047e-05	122.715	112.778	129.862	130.89	125.275	123.632	110.202	114.651	110.898	35.4731	8.22859	0.000780415	0.00234124	0.00702378	0.0210713	0.0632139	0.189642	0.568925	1.70678	5.12033	15.361	46.0829	Chloroxine	NA	Antibacterial	OC1=C2N=CC=CC2=C(Cl)C=C1Cl
NCGC00095322-03	Ubidecarenone	NA	mitochondrial electron transport	s-ewing-osteo-TC71-1	activity	5	4	NA	NA	NA	NA	125.685	11	NA	584.012	NA	NA	125.876	115.709	115.719	119.746	118.632	127.228	126.476	124.447	124.904	116.057	125.685	0.000780415	0.00234124	0.00702378	0.0210713	0.0632139	0.189642	0.568925	1.70678	5.12033	15.361	46.0829	Ubidecarenone	NA	mitochondrial electron transport	COC1=C(OC)C(=O)C(C)=C(C\C=C(/C)CC\C=C(/C)CC\C=C(/C)CC\C=C(/C)CC\C=C(/C)CC\C=C(/C)CC\C=C(/C)CC\C=C(/C)CC\C=C(/C)CC\C=C(/C)C)C1=O
NCGC00095348-07	Diindolylmethane	AR	Androgen Receptor Antagonist	s-ewing-osteo-TC71-1	activity	4	-1.1	-5.37921	3.132	16.2957	130.754	4.31104	11	504.476	508.212	0.979507	1.06725e-05	124.158	125.81	132.545	133.96	136.243	128.55	129.367	129.437	53.1051	31.59	4.31104	0.000780415	0.00234124	0.00702378	0.0210713	0.0632139	0.189642	0.568925	1.70678	5.12033	15.361	46.0829	Diindolylmethane	AR	Androgen Receptor Antagonist	C(C1=C[NH]C2=C1C=CC=C2)C3=C[NH]C4=C3C=CC=C4
NCGC00095460-06	Hematoxylin	NA	Iron Chelator	s-ewing-osteo-TC71-1	activity	1.3	4	-8.22921	0.8	115.573	103.073	113.087	11	543.256	544.277	0.529988	0.232925	103.573	109.755	109.825	110.142	109.931	120.813	121.395	113.204	111.852	117.106	113.087	0.000780415	0.00234124	0.00702378	0.0210713	0.0632139	0.189642	0.568925	1.70678	5.12033	15.361	46.0829	Hematoxylin	NA	Iron Chelator	OC1=CC2=C(C=C1O)C3C4=C(OCC3(O)C2)C(=C(O)C=C4)O
NCGC00095486-03	Ergosterol	NA	Sterol (fungal cell wall)	s-ewing-osteo-TC71-1	activity	2.1	-3	-4.57921	4.09497	57.064	122.876	63.5274	11	571.105	570.153	0.926087	0.00125466	125.913	124.73	123.052	133.899	121.644	124.387	120.457	119.739	112.916	114.723	63.5274	0.000780415	0.00234124	0.00702378	0.0210713	0.0632139	0.189642	0.568925	1.70678	5.12033	15.361	46.0829	Ergosterol	NA	Sterol (fungal cell wall)	CC(C)C(C)/C=C/C(C)C1CCC2\C3=C\C=C/4CC(O)CCC4(C)C3CCC12C
NCGC00095537-06	Ribitol	NA	sugar alcohol	s-ewing-osteo-TC71-1	activity	2.3	4	-4.67921	1.96734	99.7564	127.475	101.793	11	600.911	602.854	0.74471	0.0596172	121.975	124.905	128.578	124.418	131.983	129.504	137.502	124.157	122.729	120.304	101.793	0.000780415	0.00234124	0.00702378	0.0210713	0.0632139	0.189642	0.568925	1.70678	5.12033	15.361	46.0829	Ribitol	NA	sugar alcohol	OCC(O)C(O)C(O)CO
NCGC00095597-02	Andrographolide	TNF	TNF-alpha Production Inhibitor	s-ewing-osteo-TC71-1	activity	1.3	4	-5.51797	3.98997	134.614	151.829	133.85	11	728.08	728.076	0.662932	0.117018	154.329	153.24	152.766	147.558	146.005	152.737	154.961	141.977	124.15	145.951	133.85	0.00156083	0.00468253	0.0140476	0.0421426	0.126428	0.379284	1.13785	3.41355	10.2407	30.722	92.1659	Andrographolide	TNF	TNF-alpha Production Inhibitor	C[C@@]1(CO)C(O)CC[C@]2(C)C(C/C=C/3C(O)COC3=O)C(=C)CCC12
NCGC00095694-05	Ostol	GABRA1	GABAA Receptor Modulator	s-ewing-osteo-TC71-1	activity	2.1	-2.4	-4.67921	1.331	70.2158	137.846	82.3303	11	630.243	629.807	0.907343	0.179218	142.903	134.274	135.26	141.86	103.841	137.564	138.34	131.917	121.202	121.155	82.3303	0.000780415	0.00234124	0.00702378	0.0210713	0.0632139	0.189642	0.568925	1.70678	5.12033	15.361	46.0829	Ostol	GABRA1	GABAA Receptor Modulator	COC1=C(CC=C(C)C)C2=C(\C=C/C(=O)O2)C=C1
NCGC00095707-03	Solanesol	NA	tobacco isoprenoid alcohol	s-ewing-osteo-TC71-1	activity	2.3	4	-4.67921	0.9	98.304	124.353	103.229	11	582.922	584.655	0.555365	0.209053	117.853	116.409	128.207	129.664	125.923	129.654	127.431	114.713	116.375	118.797	103.229	0.000780415	0.00234124	0.00702378	0.0210713	0.0632139	0.189642	0.568925	1.70678	5.12033	15.361	46.0829	Solanesol	NA	tobacco isoprenoid alcohol	CC(C)=CCC/C(C)=C/CC/C(C)=C/CC/C(C)=C/CC/C(C)=C/CC/C(C)=C/CC\C(C)=C\CC\C(C)=C\CC\C(C)=C\CO
NCGC00095709-06	Tanshinone IIA	TNF	TNF-alpha Production Inhibitors	s-ewing-osteo-TC71-1	activity	1.3	4	-6.02921	3.06545	116.635	134.053	118.505	11	614.27	613.826	0.683968	0.100848	138.053	125.99	130.452	132.74	145.779	132.16	131.424	119.471	109.371	122.053	118.505	0.000780415	0.00234124	0.00702378	0.0210713	0.0632139	0.189642	0.568925	1.70678	5.12033	15.361	46.0829	Tanshinone IIA	TNF	TNF-alpha Production Inhibitors	CC1=COC2=C1C(=O)C(=O)C3=C2C=CC4=C3CCCC4(C)C
NCGC00095838-03	Sumatriptan succinate	HTR1B	5-HT1B Agonist	s-ewing-osteo-TC71-1	activity	1.3	4	-7.92921	1.6259	138.898	125.397	122.23	11	651.668	650.427	0.705048	0.107899	128.398	122.147	131.922	133.022	140.557	134.145	141.217	144.851	136.497	136.366	122.23	0.000780415	0.00234124	0.00702378	0.0210713	0.0632139	0.189642	0.568925	1.70678	5.12033	15.361	46.0829	Sumatriptan succinate	HTR1B	5-HT1B Agonist	CN[S+]([O-])(=O)CC1=CC=C2[NH]C=C(CCN(C)C)C2=C1
NCGC00095899-04	Rizatriptan benzoate	HTR1B	5-HT1B Agonist	s-ewing-osteo-TC71-1	activity	1.3	4	-8.82921	4.50447	116.084	106.084	102.453	11	555.173	554.824	0.347188	0.420358	106.584	114.962	111.517	118.424	109.398	119.051	122.966	111.981	116.212	117.55	102.453	0.000780415	0.00234124	0.00702378	0.0210713	0.0632139	0.189642	0.568925	1.70678	5.12033	15.361	46.0829	Rizatriptan benzoate	HTR1B	5-HT1B Agonist	CN(C)CCC1=C[NH]C2=CC=C(C[N]3C=NC=N3)C=C12
NCGC00095977-03	Paeonol	NA	Lipid Peroxidation Inhibitors	s-ewing-osteo-TC71-1	activity	1.1	4	-7.02921	2.72022	126.552	113.767	126.516	11	581.691	580.761	0.958358	0.000158489	116.052	113.781	111.231	114.236	116.805	124.789	124.936	127.059	125.802	127.9	126.516	0.000780415	0.00234124	0.00702378	0.0210713	0.0632139	0.189642	0.568925	1.70678	5.12033	15.361	46.0829	Paeonol	NA	Lipid Peroxidation Inhibitors	COC1=CC=C(C(C)=O)C(=C1)O
NCGC00095986-02	10-hydroxycamptothecin	TOP1	DNA Topoisomerase I Inhibitors	s-ewing-osteo-TC71-1	activity	4	-1.1	-7.92921	2.84727	7.39669	146.584	4.2496	11	199.687	199.086	0.999251	0	147.299	145.276	120.686	28.5671	10.4365	7.25754	7.23384	10.0086	6.30359	5.40505	4.2496	0.000780415	0.00234124	0.00702378	0.0210713	0.0632139	0.189642	0.568925	1.70678	5.12033	15.361	46.0829	10-hydroxycamptothecin	TOP1	DNA Topoisomerase I Inhibitors	CC[C@@]1(O)C(=O)OCC/2=C1/C=C3\N(CC4=CC5=CC(=CC=C5N=C34)O)C2=O
NCGC00096075-03	Parietin	PTP4A1	Protein Tyrosine Phosphatase (PTP) Inhibitors	s-ewing-osteo-TC71-1	activity	1.3	4	-6.19041	4.95492	122.073	138.221	115.431	11	675.004	672.729	0.63579	0.138958	142.221	131.602	134.582	135.131	138.677	138.381	145.233	125.18	117.42	133.549	115.431	0.00039023	0.00117065	0.00351189	0.0105357	0.031607	0.0948209	0.284463	0.853388	2.56016	7.68049	23.0415	Parietin	PTP4A1	Protein Tyrosine Phosphatase (PTP) Inhibitors	COC1=CC2=C(C(=C1)O)C(=O)C3=C(C=C(C)C=C3O)C2=O
NCGC00096077-05	Olanzapine	DRD2	Dopamine D2 Antagonist	s-ewing-osteo-TC71-1	activity	1.3	4	-8.07921	4.95492	110.1	102.191	108.224	11	520.878	520.619	0.385328	0.363297	103.6	100.735	104.414	114.147	109.884	100.342	107.21	115.843	109.971	114.67	108.224	0.000780415	0.00234124	0.00702378	0.0210713	0.0632139	0.189642	0.568925	1.70678	5.12033	15.361	46.0829	Olanzapine	DRD2	Dopamine D2 Antagonist	CN1CCN(CC1)C/2=N/C3=CC=CC=C3NC4=C2C=C(C)S4
NCGC00096081-03	beta-Carotene	NA	Vitamin/Supplement	s-ewing-osteo-TC71-1	activity	4	-2.1	-4.72921	1.96734	19.3804	139.684	28.0742	11	615.162	616.35	0.960661	0.000127115	136.746	142.223	143.541	136.739	143.295	145.563	137.598	137.163	118.349	102.844	28.0742	0.000780415	0.00234124	0.00702378	0.0210713	0.0632139	0.189642	0.568925	1.70678	5.12033	15.361	46.0829	beta-Carotene	NA	Vitamin/Supplement	CC\1=C(/C=C/C(C)=C/C=C/C(C)=C/C=C/C=C(C)/C=C/C=C(C)/C=C/C2=C(C)/CCCC2(C)C)C(C)(C)CCC1
NCGC00096095-02	8-Cl-Ado	TERT	Telomerase Inhibitor	s-ewing-osteo-TC71-1	activity	4	-2.1	-4.57921	4.09497	-9.64409	137.594	4.42602	11	617.705	616.707	0.982841	5.3706e-06	139.716	141.193	145.862	141.341	141.692	129.049	137.968	129.455	134.069	119.531	4.42602	0.000780415	0.00234124	0.00702378	0.0210713	0.0632139	0.189642	0.568925	1.70678	5.12033	15.361	46.0829	8-Cl-Ado	TERT	Telomerase Inhibitor	NC1=NC=NC2=C1N=C(Cl)[N]2[C@@H]3O[C@H](CO)[C@@H](O)[C@H]3O
NCGC00142400-06	Chenodeoxycholic acid	NA	Farnesoid X Receptor Agonist; Steroid	s-ewing-osteo-TC71-1	activity	1.3	2.4	-5.07921	0.4	160.989	114.425	150.684	11	605.273	610.206	0.73266	0.0670122	110.448	121.896	123.252	130.996	115.598	119.303	126.454	127.467	133.436	138.773	150.684	0.000780415	0.00234124	0.00702378	0.0210713	0.0632139	0.189642	0.568925	1.70678	5.12033	15.361	46.0829	Chenodeoxycholic acid	NA	Farnesoid X Receptor Agonist; Steroid	C[C@H](CCC(O)=O)[C@H]1CC[C@H]2[C@@H]3[C@H](O)C[C@@H]4C[C@H](O)CC[C@]4(C)[C@H]3CC[C@]12C
NCGC00142423-03	Phlorizin	NA	SGLT-1/2 inhibitor	s-ewing-osteo-TC71-1	activity	5	4	NA	NA	NA	NA	118.837	11	NA	567.079	NA	NA	116.019	111.192	127.05	118.448	130.728	120.646	119.208	105.093	112.492	117.433	118.837	0.000780415	0.00234124	0.00702378	0.0210713	0.0632139	0.189642	0.568925	1.70678	5.12033	15.361	46.0829	Phlorizin	NA	SGLT-1/2 inhibitor	OC[C@H]1O[C@@H](OC2=C(C(=O)CCC3=CC=C(O)C=C3)C(=CC(=C2)O)O)[C@H](O)[C@@H](O)[C@@H]1O
NCGC00142483-02	Cytidine	NA	DNA Polymerase Inhibitors; nucleoside	s-ewing-osteo-TC71-1	activity	1.3	4	-7.37921	4.95492	126.67	115.67	124.911	11	590.062	589.956	0.763864	0.0487612	113.67	116.72	117.926	114.221	125.965	120.82	131.942	127.328	124.308	128.694	124.911	0.000780415	0.00234124	0.00702378	0.0210713	0.0632139	0.189642	0.568925	1.70678	5.12033	15.361	46.0829	Cytidine	NA	DNA Polymerase Inhibitors; nucleoside	NC\1=N\C(=O)N(\C=C1)[C@@H]2O[C@H](CO)[C@@H](O)[C@H]2O
NCGC00142598-05	beta-Sitosterol	NA	Cholesterol lowering drug	s-ewing-osteo-TC71-1	activity	1.3	4	-5.52921	4.95492	116.922	133.199	113.552	11	620.25	620.609	0.711638	0.0810193	134.199	133.524	123.81	138.056	138.581	126.742	136.346	133.962	116.184	121.223	113.552	0.000780415	0.00234124	0.00702378	0.0210713	0.0632139	0.189642	0.568925	1.70678	5.12033	15.361	46.0829	beta-Sitosterol	NA	Cholesterol lowering drug	CC[C@H](CC[C@@H](C)[C@H]1CC[C@H]2[C@@H]3C\C=C/4C[C@@H](O)CC[C@]4(C)[C@H]3CC[C@]12C)C(C)C
NCGC00142599-02	Stigmasterol	NA	Steroid hormone	s-ewing-osteo-TC71-1	activity	2.3	4	-4.89041	2.63843	105.495	122.932	108.485	11	617.822	617.897	0.675976	0.107531	120.932	117.284	125.72	126.111	124.709	118.98	127.088	122.054	122.438	119.463	108.485	0.00039023	0.00117065	0.00351189	0.0105357	0.031607	0.0948209	0.284463	0.853388	2.56016	7.68049	23.0415	Stigmasterol	NA	Steroid hormone	CC[C@H](\C=C\[C@@H](C)[C@H]1CC[C@H]2[C@@H]3C\C=C/4C[C@@H](O)CC[C@]4(C)[C@H]3CC[C@]12C)C(C)C
NCGC00142605-03	Salicin	NA	Antiinflammatory agent	s-ewing-osteo-TC71-1	activity	1.3	4	-7.62921	1.82648	119.299	112.799	112.83	11	563.812	562.95	0.511861	0.279046	112.299	113.39	114.159	115.332	117.65	123.933	123.629	117.765	117.639	114.494	112.83	0.000780415	0.00234124	0.00702378	0.0210713	0.0632139	0.189642	0.568925	1.70678	5.12033	15.361	46.0829	Salicin	NA	Antiinflammatory agent	OC[C@H]1O[C@@H](OC2=CC=CC=C2CO)[C@H](O)[C@@H](O)[C@@H]1O
NCGC00142615-03	Epinephrine	ADRA1A	alpha/beta-adrenoceptor agonist	s-ewing-osteo-TC71-1	activity	2.3	-2.4	-4.46797	0.7	64.2344	120.806	78.3955	11	560.734	561.281	0.742024	0.0611234	120.538	115.98	112.257	135.721	116.23	122.189	114.681	111.84	94.5994	104.578	78.3955	0.00156083	0.00468253	0.0140476	0.0421426	0.126428	0.379284	1.13785	3.41355	10.2407	30.722	92.1659	Epinephrine	ADRA1A	alpha/beta-adrenoceptor agonist	Oc1ccc(cc1O)[C@@H](O)CNC
NCGC00142624-04	Lactulose	NA	synthetic sugar	s-ewing-osteo-TC71-1	activity	2.3	4	-4.57921	4.09497	114.659	129.864	116.11	11	619.703	620.968	0.589431	0.179436	125.864	128.344	129.486	133.897	131.316	132.599	128.472	135.742	123.555	128.469	116.11	0.000780415	0.00234124	0.00702378	0.0210713	0.0632139	0.189642	0.568925	1.70678	5.12033	15.361	46.0829	Lactulose	NA	synthetic sugar	OC[C@H]1O[C@@H](O[C@@H]2[C@@H](CO)O[C@](O)(CO)[C@H]2O)[C@H](O)[C@@H](O)[C@H]1O
NCGC00159326-02	Lincomycin hydrochloride	NA	Antibiotic	s-ewing-osteo-TC71-1	activity	1.3	-2.4	-5.62921	0.3	101.698	134.859	110.308	11	592.144	592.204	0.841741	0.0154885	133.359	128.609	129.682	131.89	122.703	129.267	118.737	116.446	121.08	112.764	110.308	0.000780415	0.00234124	0.00702378	0.0210713	0.0632139	0.189642	0.568925	1.70678	5.12033	15.361	46.0829	Lincomycin hydrochloride	NA	Antibiotic	Cl.O[C@@H]1[C@@H](O)[C@@H](O)[C@H](O[C@@H]1SC)[C@H](NC(=O)[C@@H]2C[C@@H](CCC)CN2C)[C@@H](C)O
NCGC00159336-05	Sulbactam	NA	beta-Lactamase Inhibitor	s-ewing-osteo-TC71-1	activity	5	4	NA	NA	NA	NA	134.366	11	NA	631.921	NA	NA	126.581	129.045	133.222	127.041	137.436	138.963	130.7	125.053	131.676	130.859	134.366	0.000780415	0.00234124	0.00702378	0.0210713	0.0632139	0.189642	0.568925	1.70678	5.12033	15.361	46.0829	Sulbactam	NA	beta-Lactamase Inhibitor	CC1(C)[C@@H](N2[C@@H](CC2=O)[S+]1([O-])=O)C(O)=O
NCGC00159337-06	Efavirenz	TERT	Reverse Transcriptase Inhibitor	s-ewing-osteo-TC71-1	activity	2.1	-2.2	-4.62921	4.09497	33.5569	111.107	39.3866	11	508.462	510.72	0.945346	0.000426704	106.042	101.552	110.245	111.53	117.81	106.617	112.364	116.791	118.09	99.782	39.3866	0.000780415	0.00234124	0.00702378	0.0210713	0.0632139	0.189642	0.568925	1.70678	5.12033	15.361	46.0829	Efavirenz	TERT	Reverse Transcriptase Inhibitor	FC(F)(F)C1(OC(=O)NC2=CC=C(Cl)C=C12)C#CC3CC3
NCGC00159341-03	Lamivudine	TERT	Reverse Transcriptase Inhibitor	s-ewing-osteo-TC71-1	activity	1.3	4	-7.56797	4.95492	127.38	114.575	124.264	11	614.254	614.384	0.585254	0.182494	116.88	115.471	111.209	127.742	121.452	124.817	137.21	120.729	128.624	132.497	124.264	0.00156083	0.00468253	0.0140476	0.0421426	0.126428	0.379284	1.13785	3.41355	10.2407	30.722	92.1659	Lamivudine	TERT	Reverse Transcriptase Inhibitor	NC1=NC(=O)N(C=C1)[C@@H]2O[C@H](CO)SC2
NCGC00159346-05	Terbinafine hydrochloride	NA	Fungal Squalene Monooxygenase Inhibitor	s-ewing-osteo-TC71-1	activity	1.3	4	-6.77921	1.92824	116.295	103.564	102.748	11	529.346	528.247	0.836919	0.0259433	103.295	106.601	100.602	105.59	104.172	111.568	113.259	118.9	118.684	111.881	102.748	0.000780415	0.00234124	0.00702378	0.0210713	0.0632139	0.189642	0.568925	1.70678	5.12033	15.361	46.0829	Terbinafine hydrochloride	NA	Fungal Squalene Monooxygenase Inhibitor	CN(C\C=C\C#CC(C)(C)C)CC1=CC=CC2=C1C=CC=C2
NCGC00159349-07	Levonorgestrel	PGR	Progestogen hormone	s-ewing-osteo-TC71-1	activity	1.3	4	-8.42921	4.95492	121.6	111.302	114.539	11	577.364	576.636	0.611851	0.187286	113.6	110.018	124.754	117.845	125.557	121.366	124.908	121.056	116.314	120.663	114.539	0.000780415	0.00234124	0.00702378	0.0210713	0.0632139	0.189642	0.568925	1.70678	5.12033	15.361	46.0829	Levonorgestrel	PGR	Progestogen hormone	CC[C@]12CC[C@H]3[C@@H](CCC/4=C/C(=O)CC[C@H]34)[C@@H]1CC[C@@]2(O)C#C
NCGC00159356-02	Nandrolone phenpropionate	NA	Steroid hormone	s-ewing-osteo-TC71-1	activity	4	-1.1	-5.02921	4.95492	26.7789	112.828	26.7037	11	478.944	481.01	0.976019	1.95299e-05	103.828	107.976	105.869	120.478	113.675	112.852	119.231	116.82	110.598	33.4029	26.7037	0.000780415	0.00234124	0.00702378	0.0210713	0.0632139	0.189642	0.568925	1.70678	5.12033	15.361	46.0829	Nandrolone phenpropionate	NA	Steroid hormone	O=C5CC[C@H]4C(CC[C@@H]2[C@@H]4CC[C@]3(C)[C@@H](OC(=O)CCc1ccccc1)CC[C@@H]23)=C5
NCGC00159360-02	Betamethasone dipropionate	NA	Glucocorticoid steroid	s-ewing-osteo-TC71-1	activity	2.3	-3	-4.42921	4.95492	55.7439	110.881	68.9379	11	521.426	521.109	0.850596	0.0129455	110.169	109.203	115.434	106.921	108.467	98.3057	113.971	116.821	113.532	114.865	68.9379	0.000780415	0.00234124	0.00702378	0.0210713	0.0632139	0.189642	0.568925	1.70678	5.12033	15.361	46.0829	Betamethasone dipropionate	NA	Glucocorticoid steroid	CCC(=O)OCC(=O)[C@@]4(OC(=O)CC)[C@@H](C)C[C@@H]3[C@]4(C)C[C@H](O)[C@@]2(F)[C@H]3CCC1=CC(=O)C=C[C@@]12C
NCGC00159370-05	Docosanol	NA	Anti-Herpes Simplex Virus Drug	s-ewing-osteo-TC71-1	activity	1.3	1.4	-8.57921	0.7	124.755	97.2549	130.125	11	578.899	578.512	0.75594	0.0530659	101.255	115.832	114.394	118.192	125.718	119.258	122.939	118.419	126.706	125.694	130.125	0.000780415	0.00234124	0.00702378	0.0210713	0.0632139	0.189642	0.568925	1.70678	5.12033	15.361	46.0829	Docosanol	NA	Anti-Herpes Simplex Virus Drug	CCCCCCCCCCCCCCCCCCCCCCO
NCGC00159406-11	Noradrenaline bitartrate monohydrate	ADRA1A	alpha/beta-adrenoceptor agonist	s-ewing-osteo-TC71-1	activity	1.3	4	-5.12921	4.95492	106.311	124.318	108.948	11	583.074	583.648	0.813952	0.0250364	122.818	120.485	124.111	129.06	124.505	128.557	127.308	118.347	122.444	104.479	108.948	0.000780415	0.00234124	0.00702378	0.0210713	0.0632139	0.189642	0.568925	1.70678	5.12033	15.361	46.0829	Noradrenaline bitartrate monohydrate	ADRA1A	alpha/beta-adrenoceptor agonist	NC[C@H](O)C1=CC=C(O)C(=C1)O
NCGC00159418-02	Tegafur	NA	Pyrimidine Antagonists	s-ewing-osteo-TC71-1	activity	2.3	4	-4.41797	0.8	106.198	145.001	116.665	11	696.265	687.527	0.609	0.161573	149.001	142.716	143.698	138.433	133.567	138.584	142.226	149.592	128.071	130.885	116.665	0.00156083	0.00468253	0.0140476	0.0421426	0.126428	0.379284	1.13785	3.41355	10.2407	30.722	92.1659	Tegafur	NA	Pyrimidine Antagonists	FC1=CN(C(=O)NC1=O)C2CCCO2
NCGC00159422-02	Tiopronin	NA	Copper Chelator	s-ewing-osteo-TC71-1	activity	2.3	-3	-4.42921	4.95492	46.1711	128.789	65.5612	11	601.751	602.951	0.883524	0.00586833	125.036	121.517	126.875	116.452	126.283	131.617	140.511	134	130.126	136.178	65.5612	0.000780415	0.00234124	0.00702378	0.0210713	0.0632139	0.189642	0.568925	1.70678	5.12033	15.361	46.0829	Tiopronin	NA	Copper Chelator	OC(=O)CNC(=O)C(C)S
NCGC00159438-02	Selenomethionine	NA	dietary supplement	s-ewing-osteo-TC71-1	activity	1.3	4	-5.66797	0.9	105.194	129.094	103.177	11	601.477	603.389	0.679132	0.104469	133.094	123.943	123.979	123.725	135.773	128.461	121.215	110.353	106.028	119.093	103.177	0.00156083	0.00468253	0.0140476	0.0421426	0.126428	0.379284	1.13785	3.41355	10.2407	30.722	92.1659	Selenomethionine	NA	dietary supplement	O=C(O)C(N)CC[Se]C
NCGC00159453-06	Zileuton	ALOX5	5-Lipoxygenase Inhibitor	s-ewing-osteo-TC71-1	activity	1.3	4	-6.42921	1.47874	124.585	134.162	118.931	11	624.485	625.52	0.608477	0.162714	133.162	136.736	131.84	137.299	129.61	132.617	128.964	122.51	125.301	131.276	118.931	0.000780415	0.00234124	0.00702378	0.0210713	0.0632139	0.189642	0.568925	1.70678	5.12033	15.361	46.0829	Zileuton	ALOX5	5-Lipoxygenase Inhibitor	CC(N(O)C(N)=O)C1=CC2=CC=CC=C2S1
NCGC00159455-04	Gefitinib	EGFR	EGFR (HER1; erbB1) inhibitor	s-ewing-osteo-TC71-1	activity	4	-2.1	-4.51797	1	-17.192	143.941	22.027	11	615.624	615.857	0.981149	7.7308e-06	144.587	140.905	151.21	142.669	144.034	144.02	130.63	121.479	115.218	58.7093	22.027	0.00156083	0.00468253	0.0140476	0.0421426	0.126428	0.379284	1.13785	3.41355	10.2407	30.722	92.1659	Gefitinib	EGFR	EGFR (HER1; erbB1) inhibitor	COC1=CC2=NC=NC(=C2C=C1OCCCN3CCOCC3)NC4=CC=C(F)C(=C4)Cl
NCGC00159456-06	Imatinib	ABL1	Bcr-Abl Inhibitor	s-ewing-osteo-TC71-1	activity	2.1	-2.2	-4.62921	4.09497	49.6144	123.718	54.8429	11	570.219	570.954	0.947609	0.000365891	119.606	116.386	125.965	128.76	127.25	132.601	118.615	119.862	124.8	111.129	54.8429	0.000780415	0.00234124	0.00702378	0.0210713	0.0632139	0.189642	0.568925	1.70678	5.12033	15.361	46.0829	Imatinib	ABL1	Bcr-Abl Inhibitor	CN1CCN(CC1)CC2=CC=C(C=C2)C(=O)NC3=CC=C(C)C(=C3)NC4=NC=CC(=N4)C5=CC=CN=C5
NCGC00159459-02	Mycophenolate mofetil	IMPDH1	Inosine 5'-Monophosphate Dehydrogenase (IMPDH) Inhibitors	s-ewing-osteo-TC71-1	activity	4	-1.1	-5.82921	1.80795	27.2565	126.56	22.5464	11	456.509	457.397	0.987759	1.4404e-06	124.941	118.109	130.455	122.328	129.712	128.281	115.032	66.2463	43.3466	29.7319	22.5464	0.000780415	0.00234124	0.00702378	0.0210713	0.0632139	0.189642	0.568925	1.70678	5.12033	15.361	46.0829	Mycophenolate mofetil	IMPDH1	Inosine 5'-Monophosphate Dehydrogenase (IMPDH) Inhibitors	Oc3c1C(=O)OCc1c(C)c(OC)c3C\C=C(/C)CCC(=O)OCCN2CCOCC2
NCGC00159460-02	Indinavir sulfate	NA	HIV Protease Inhibitors	s-ewing-osteo-TC71-1	activity	4	-1.1	-5.92921	4.95492	6.89136	115.297	5.86707	11	375.059	376.548	0.995094	3.91e-08	108.296	110.793	114.864	117.911	122.542	115.666	114.468	20.3132	8.27974	6.855	5.86707	0.000780415	0.00234124	0.00702378	0.0210713	0.0632139	0.189642	0.568925	1.70678	5.12033	15.361	46.0829	Indinavir sulfate	NA	HIV Protease Inhibitors	O[C@H](CN1CCN(C[C@H]1C(=O)NC(C)(C)C)Cc2cccnc2)C[C@@H](Cc3ccccc3)C(=O)N[C@H]4c5ccccc5C[C@H]4O.O=S(=O)(O)O
NCGC00159461-03	Amprenavir	NA	HIV Protease Inhibitors	s-ewing-osteo-TC71-1	activity	2.1	-2.2	-4.72921	2.33317	70.7605	124.421	74.808	11	573.686	573.994	0.979243	1.12276e-05	125.402	122.92	124.817	129.618	126.937	121.791	124.826	123.129	119.911	103.427	74.808	0.000780415	0.00234124	0.00702378	0.0210713	0.0632139	0.189642	0.568925	1.70678	5.12033	15.361	46.0829	Amprenavir	NA	HIV Protease Inhibitors	[H][C@@](O)(CN(CC(C)C)[S+]([O-])(=O)C1=CC=C(N)C=C1)[C@]([H])(CC2=CC=CC=C2)NC(=O)O[C@@]3([H])CCOC3
NCGC00159483-03	Hydroxychloroquine sulfate	MAP1LC3A	Autophagy Inhibitor	s-ewing-osteo-TC71-1	activity	2.1	-3	-4.47921	4.95492	33.0159	115.675	46.4679	11	536.219	537.217	0.96631	7.11343e-05	113.505	112.996	117.538	123.084	112.291	110.577	120.832	116.587	112.385	116.227	46.4679	0.000780415	0.00234124	0.00702378	0.0210713	0.0632139	0.189642	0.568925	1.70678	5.12033	15.361	46.0829	Hydroxychloroquine sulfate	MAP1LC3A	Autophagy Inhibitor	CCN(CCO)CCCC(C)NC1=CC=NC2=CC(=CC=C12)Cl
NCGC00159489-04	Chloramphenicol palmitate	NA	Antibiotic	s-ewing-osteo-TC71-1	activity	1.3	4	-7.62921	0.3	132.856	108.856	133.226	11	595.707	595.52	0.61203	0.159293	112.856	117.896	115.298	127.45	123.158	119.552	131.187	128.185	120.643	131.847	133.226	0.000780415	0.00234124	0.00702378	0.0210713	0.0632139	0.189642	0.568925	1.70678	5.12033	15.361	46.0829	Chloramphenicol palmitate	NA	Antibiotic	O=[N+]([O-])c1ccc(cc1)[C@@H](O)[C@@H](COC(=O)CCCCCCCCCCCCCCC)NC(=O)C(Cl)Cl
NCGC00159491-05	Rimantadine	NA	M2 Channel Inhibitor	s-ewing-osteo-TC71-1	activity	1.3	4	-8.57921	0.7	123.277	103.777	119.472	11	577.833	579.13	0.692455	0.0950499	107.777	116.901	115.358	116.832	124.249	120.936	125.368	124.063	128.237	119.359	119.472	0.000780415	0.00234124	0.00702378	0.0210713	0.0632139	0.189642	0.568925	1.70678	5.12033	15.361	46.0829	Rimantadine	NA	M2 Channel Inhibitor	CC(N)C12CC3CC(CC(C3)C1)C2
NCGC00159508-05	Rose Bengal disodium	NA	Free radical formation	s-ewing-osteo-TC71-1	activity	1.1	-2.2	-4.82921	1.80795	55.0384	121.526	63.1207	11	546.834	546.265	0.973614	2.81665e-05	120.851	115.701	118.53	119.253	125.206	126.38	121.514	123.629	111.343	86.6891	63.1207	0.000780415	0.00234124	0.00702378	0.0210713	0.0632139	0.189642	0.568925	1.70678	5.12033	15.361	46.0829	Rose Bengal disodium	NA	Free radical formation	[O-]C(=O)C1=C(C(=C(Cl)C(=C1Cl)Cl)Cl)C/2=C/3\C=C(I)/C(=O)/C(=C3OC4=C2C=C(I)C(=C4I)[O-])I
NCGC00159509-02	Perindopril	ACE	Angiotensin-I Converting Enzyme Inhibitor	s-ewing-osteo-TC71-1	activity	1.1	-2.2	-4.82921	1.28756	85.7252	138.788	93.9838	11	635.242	636.482	0.956899	0.000178741	135.277	138.68	134.873	143.758	140.292	135.905	142.38	135.468	126.624	114.416	93.9838	0.000780415	0.00234124	0.00702378	0.0210713	0.0632139	0.189642	0.568925	1.70678	5.12033	15.361	46.0829	Perindopril	ACE	Angiotensin-I Converting Enzyme Inhibitor	O=C(OCC)[C@H](CCC)N[C@@H](C)C(=O)N1[C@@H](C[C@@H]2CCCC[C@H]12)C(=O)O
NCGC00159510-04	Aripiprazole	HTR2A	5-HT1A/2A Antagonists?	s-ewing-osteo-TC71-1	activity	1.3	-1.3	-8.87921	4.95492	106.29	204.726	61.5718	11	535.381	545.476	0.74549	0.0589732	197.909	112.277	120.672	111.581	118.397	118.246	109.769	110.217	101.649	106.142	61.5718	0.000780415	0.00234124	0.00702378	0.0210713	0.0632139	0.189642	0.568925	1.70678	5.12033	15.361	46.0829	Aripiprazole	HTR2A	5-HT1A/2A Antagonists?	ClC1=CC=CC(=C1Cl)N2CCN(CCCCOC3=CC=C4CCC(=O)NC4=C3)CC2
NCGC00159513-02	Cefprozil monohydrate	NA	Cephalosporin antibiotic	s-ewing-osteo-TC71-1	activity	1.3	4	-8.27921	3.98997	128.468	120.468	120.135	11	610.991	610.239	0.435854	0.345849	120.468	120.609	126.324	130.483	122.972	122.505	134.176	132.358	126.644	128.757	120.135	0.000780415	0.00234124	0.00702378	0.0210713	0.0632139	0.189642	0.568925	1.70678	5.12033	15.361	46.0829	Cefprozil monohydrate	NA	Cephalosporin antibiotic	O.Oc1ccc(cc1)[C@@H](N)C(=O)N[C@@H]3C(=O)N2C(=C(C=CC)CS[C@@H]23)C(=O)O
NCGC00159515-02	Eszopiclone	GABRA1	GABAA Receptor Modulator	s-ewing-osteo-TC71-1	activity	2.3	4	-4.67921	4.09497	100.75	126.218	101.744	11	597.264	597.406	0.74647	0.0585784	124.218	118.588	126.985	127.749	128.435	128.644	125.747	134.842	120.178	120.4	101.744	0.000780415	0.00234124	0.00702378	0.0210713	0.0632139	0.189642	0.568925	1.70678	5.12033	15.361	46.0829	Eszopiclone	GABRA1	GABAA Receptor Modulator	CN1CCN(CC1)C(=O)O[C@H]4c2nccnc2C(=O)N4c3ccc(Cl)cn3
NCGC00159518-04	Rabeprazole	NA	H+/K+-ATPase Inhibitor	s-ewing-osteo-TC71-1	activity	2.3	-3	-4.67921	4.50447	95.2283	133.583	97.6582	11	628.2	629.484	0.886125	0.00545988	129.083	136.225	131.1	133.64	125.809	133.606	135.183	139.107	138.208	125.837	97.6582	0.000780415	0.00234124	0.00702378	0.0210713	0.0632139	0.189642	0.568925	1.70678	5.12033	15.361	46.0829	Rabeprazole	NA	H+/K+-ATPase Inhibitor	COCCCOC1=CC=NC(=C1C)C[S+]([O-])C2=NC3=CC=CC=C3[N-]2
NCGC00159521-05	Zoledronic acid monohydrate	FDPS	Farnesyl Pyrophosphate Synthase Inhibitors	s-ewing-osteo-TC71-1	activity	1.3	1.4	-7.24041	0.3	136.966	106.868	134.404	11	630.748	630.335	0.872023	0.00799028	113.966	108.468	116.794	122.908	121.152	123.18	122.131	126.092	131.047	130.391	134.404	0.00039023	0.00117065	0.00351189	0.0105357	0.031607	0.0948209	0.284463	0.853388	2.56016	7.68049	23.0415	Zoledronic acid monohydrate	FDPS	Farnesyl Pyrophosphate Synthase Inhibitors	OC(C[N]1C=CN=C1)([P](O)(O)=O)[P](O)(O)=O
NCGC00159541-02	S-Trityl-L-cysteine	KIF11	Mitotic Kinesin Eg5 Inhibitor	s-ewing-osteo-TC71-1	activity	4	-3	-4.52921	4.50447	4.694	122.054	18.6885	11	555.544	555.133	0.972526	3.28361e-05	118.649	113.866	120.72	120.927	132.188	120.402	117.926	121.024	130.101	116.295	18.6885	0.000780415	0.00234124	0.00702378	0.0210713	0.0632139	0.189642	0.568925	1.70678	5.12033	15.361	46.0829	S-Trityl-L-cysteine	KIF11	Mitotic Kinesin Eg5 Inhibitor	N[C@H](CSC(C1=CC=CC=C1)(C2=CC=CC=C2)C3=CC=CC=C3)C(O)=O
NCGC00159544-02	Zaldaride maleate	CALM1	Calmodulin Antagonist	s-ewing-osteo-TC71-1	activity	2.1	-2.2	-4.77921	1	62.5577	130.689	76.6749	11	586.541	586.408	0.96174	0.00011469	130.972	134.505	133.816	129.727	124.86	130.57	125.485	124.787	112.434	103.354	76.6749	0.000780415	0.00234124	0.00702378	0.0210713	0.0632139	0.189642	0.568925	1.70678	5.12033	15.361	46.0829	Zaldaride maleate	CALM1	Calmodulin Antagonist	CC1(CN2CCC(CC2)N3C(=O)NC4=C3C=CC=C4)OCC5=CC=CC=C5[N]6C=CC=C16
NCGC00159559-01	Eplerenone	NR3C2	Mineralocorticoid Receptor (MR) Antagonist	s-ewing-osteo-TC71-1	activity	1.3	4	-6.17921	0.7	130.861	119.924	110.573	11	597.247	594.626	0.422764	0.356468	126.361	113.913	117.409	120.767	125.564	120.818	127.534	121.878	134.675	127.387	110.573	0.000780415	0.00234124	0.00702378	0.0210713	0.0632139	0.189642	0.568925	1.70678	5.12033	15.361	46.0829	Eplerenone	NR3C2	Mineralocorticoid Receptor (MR) Antagonist	[H][C@@]12CC[C@@]3(CCC(=O)O3)[C@@]1(C)C[C@H]4O[C@@]45[C@@]2([H])[C@@H](CC6=CC(=O)CC[C@]56C)C(=O)OC
NCGC00159570-01	RITA	MDM2	MDM2 (hdm2) Inhibitor	s-ewing-osteo-TC71-1	activity	4	-2.1	-4.57921	4.09497	-5.54244	124.115	6.73605	11	558.131	555.733	0.916013	0.00195558	132.027	138.593	133.874	127.618	119.842	130.283	118.218	115.301	99.752	111.398	6.73605	0.000780415	0.00234124	0.00702378	0.0210713	0.0632139	0.189642	0.568925	1.70678	5.12033	15.361	46.0829	RITA	MDM2	MDM2 (hdm2) Inhibitor	OCC1=CC=C(S1)C2=CC=C(O2)C3=CC=C(CO)S3
NCGC00159574-02	ZM-447439	AURKA	Aurora-A/B Inhibitor	s-ewing-osteo-TC71-1	activity	4	-2.1	-4.77921	1	-17.1837	122.695	5.27	11	504.274	507.887	0.886319	0.0054173	117.539	120.223	115.059	125.95	134.19	125.459	129.656	93.2168	78.8724	80.0607	5.27	0.000780415	0.00234124	0.00702378	0.0210713	0.0632139	0.189642	0.568925	1.70678	5.12033	15.361	46.0829	ZM-447439	AURKA	Aurora-A/B Inhibitor	COC1=C(OCCCN2CCOCC2)C=C3N=CN=C(NC4=CC=C(NC(=O)C5=CC=CC=C5)C=C4)C3=C1
NCGC00160162-03	Hordenine	NA	Antibiotic properties	s-ewing-osteo-TC71-1	activity	2.3	-2.4	-4.72921	1.21	99.0429	132.818	104.755	11	620.411	621.393	0.830474	0.0190223	133.318	127.221	132.473	131.937	138.821	135.853	135.508	125.923	125.15	122.677	104.755	0.000780415	0.00234124	0.00702378	0.0210713	0.0632139	0.189642	0.568925	1.70678	5.12033	15.361	46.0829	Hordenine	NA	Antibiotic properties	CN(C)CCC1=CC=C(O)C=C1
NCGC00160163-01	Diosgenin	PTGS2	Cyclooxygenase up-regulator	s-ewing-osteo-TC71-1	activity	5	4	NA	NA	NA	NA	111.728	11	NA	578.067	NA	NA	117.152	123.259	111.561	121.717	127.202	114.128	124.241	122.887	124.934	118.905	111.728	0.000780415	0.00234124	0.00702378	0.0210713	0.0632139	0.189642	0.568925	1.70678	5.12033	15.361	46.0829	Diosgenin	PTGS2	Cyclooxygenase up-regulator	C[C@H]1C2C(CC3C4CC=C5CC(O)CCC5(C)C4CCC23C)O[C@]16CC[C@@H](C)CO6
NCGC00160165-01	(+)-Usniacin	NA	adrenergenic receptor antagaonist	s-ewing-osteo-TC71-1	activity	1.3	1.4	-8.37921	0.6	123.166	105.666	127.001	11	575.276	575.202	0.780285	0.0402106	107.666	114.194	119.092	114.3	120.23	123.766	122.978	120.448	122.448	121.347	127.001	0.000780415	0.00234124	0.00702378	0.0210713	0.0632139	0.189642	0.568925	1.70678	5.12033	15.361	46.0829	(+)-Usniacin	NA	adrenergenic receptor antagaonist	CC(=O)C1=C(O)C(C)=C(O)C2=C1OC3=CC(=O)C(C(C)=O)=C(O)C23C
NCGC00160217-02	Sophocarpine	KCNH2	HERG Inhibitor	s-ewing-osteo-TC71-1	activity	2.1	-2.2	-4.77921	1.1	38.5802	121.637	56.1245	11	535.683	535.996	0.960956	0.000123656	123.602	120.506	124.056	125.781	112.894	125.282	119.153	110.328	104.679	86.6862	56.1245	0.000780415	0.00234124	0.00702378	0.0210713	0.0632139	0.189642	0.568925	1.70678	5.12033	15.361	46.0829	Sophocarpine	KCNH2	HERG Inhibitor	O=C1\C=C/C[C@@H]2[C@H]3CCCN4CCC[C@@H](CN12)[C@@H]34
NCGC00160275-01	Resistomycin	POLR2A	RNA Polymerase Inhibitor	s-ewing-osteo-TC71-1	activity	4	-3	-4.47921	4.95492	-24.9102	138.138	1.90621	11	624.948	627.182	0.951819	0.000269176	128.399	130.938	144.935	151.739	149.875	144.935	137.347	131.132	122.723	135.596	1.90621	0.000780415	0.00234124	0.00702378	0.0210713	0.0632139	0.189642	0.568925	1.70678	5.12033	15.361	46.0829	Resistomycin	POLR2A	RNA Polymerase Inhibitor	CC1=C2C(O)=CC3=C4C2=C(C(O)=C1)C(=O)C5=C4C(=C(O)C=C5O)C(=O)C3(C)C
NCGC00160391-02	Auranofin	TXNRD1	Thioredoxin Reductase Inhibitors	s-ewing-osteo-TC71-1	activity	4	-1.1	-5.87921	2.40638	4.21639	114.751	5.1069	11	376.975	375.255	0.997853	1.5e-09	116.42	115.91	109.275	115.388	116.411	111.046	103.152	43.2346	5.6461	5.29183	5.1069	0.000780415	0.00234124	0.00702378	0.0210713	0.0632139	0.189642	0.568925	1.70678	5.12033	15.361	46.0829	Auranofin	TXNRD1	Thioredoxin Reductase Inhibitors	CC[P](CC)(CC)=[Au]S[C@@H]1OC(COC(C)=O)[C@@H](OC(C)=O)[C@H](OC(C)=O)C1OC(C)=O
NCGC00160396-02	Pravadoline	NA	COX inhibitor and?cannabinoid (CB)?agonist	s-ewing-osteo-TC71-1	activity	5	4	NA	NA	NA	NA	118.17	11	NA	570.31	NA	NA	117.216	110.333	115.499	117.218	116.099	117.229	127.185	138.574	112.344	114.366	118.17	0.000780415	0.00234124	0.00702378	0.0210713	0.0632139	0.189642	0.568925	1.70678	5.12033	15.361	46.0829	Pravadoline	NA	COX inhibitor and?cannabinoid (CB)?agonist	COC1=CC=C(C=C1)C(=O)C2=C(C)[N](CCN3CCOCC3)C4=CC=CC=C24
NCGC00160397-01	Irsogladine maleate	CHRM1	M1 Muscarinic acetylcholine receptor Antagonists	s-ewing-osteo-TC71-1	activity	2.3	4	-4.47921	4.09497	101.352	126.967	106.704	11	604.21	605.958	0.656307	0.12245	123.467	125.533	129.059	123.694	129.706	129.548	136.928	126.775	119.543	126.233	106.704	0.000780415	0.00234124	0.00702378	0.0210713	0.0632139	0.189642	0.568925	1.70678	5.12033	15.361	46.0829	Irsogladine maleate	CHRM1	M1 Muscarinic acetylcholine receptor Antagonists	Nc1nc(nc(N)n1)c2cc(Cl)ccc2Cl.O=C(O)/C=C\C(=O)O
NCGC00160398-04	Nafamostat mesilate	TPSAB1	Tryptase Inhibitors	s-ewing-osteo-TC71-1	activity	2.3	-3	-4.42921	4.95492	77.103	118.046	87.7813	11	558.838	559.741	0.67362	0.108645	119.401	115.944	116.471	106.84	131.325	126.103	113.958	116.944	115.301	120.168	87.7813	0.000780415	0.00234124	0.00702378	0.0210713	0.0632139	0.189642	0.568925	1.70678	5.12033	15.361	46.0829	Nafamostat mesilate	TPSAB1	Tryptase Inhibitors	NC(=N)NC1=CC=C(C=C1)C(=O)OC2=CC=C3C=C(C=CC3=C2)C(N)=N
NCGC00160421-02	Tetrabenazine	SLC18A2	Vesicular Monoamine Transporter 2 (VMAT2) Inhibitor	s-ewing-osteo-TC71-1	activity	1.3	4	-5.92921	2.95227	124.149	133.742	119.581	11	627.197	629.115	0.318652	0.419009	126.742	132.057	139.829	142.857	122.039	138.174	132.12	127.123	120.459	131.865	119.581	0.000780415	0.00234124	0.00702378	0.0210713	0.0632139	0.189642	0.568925	1.70678	5.12033	15.361	46.0829	Tetrabenazine	SLC18A2	Vesicular Monoamine Transporter 2 (VMAT2) Inhibitor	COC1=C(OC)C=C2C3CC(=O)C(CC(C)C)CN3CCC2=C1
NCGC00160428-02	Indibulin	TUBB	Tubulin polymerization inhibitor	s-ewing-osteo-TC71-1	activity	1.1	-1.1	-6.87921	3.98997	45.6391	127.601	52.0659	11	400.941	398.99	0.979826	1.00456e-05	131.168	119.379	124.3	129.069	130.012	60.5845	53.1263	41.9429	35.4982	46.8488	52.0659	0.000780415	0.00234124	0.00702378	0.0210713	0.0632139	0.189642	0.568925	1.70678	5.12033	15.361	46.0829	Indibulin	TUBB	Tubulin polymerization inhibitor	ClC1=CC=C(C[N]2C=C(C(=O)C(=O)NC3=CC=NC=C3)C4=CC=CC=C24)C=C1
NCGC00160514-03	Idebenone	NA	Free Radical Scavenger	s-ewing-osteo-TC71-1	activity	2.1	-3	-4.47921	4.95492	20.448	120.729	36.7261	11	556.298	557.343	0.970948	4.06144e-05	112.229	117.275	116.177	121.013	120.631	120.362	128.5	125.381	122.207	119.388	36.7261	0.000780415	0.00234124	0.00702378	0.0210713	0.0632139	0.189642	0.568925	1.70678	5.12033	15.361	46.0829	Idebenone	NA	Free Radical Scavenger	COC\1=C(/OC)C(=O)\C(=C(C)/C1=O)CCCCCCCCCCO
NCGC00160515-03	Acarbose	GAA	alpha-Glucosidase Inhibitors	s-ewing-osteo-TC71-1	activity	1.3	4	-6.67921	2.72022	131.745	119.137	130.617	11	602.617	601.229	0.708116	0.0835645	124.245	116.413	118.977	114.572	121.372	123.368	137.193	126.84	127.622	136.63	130.617	0.000780415	0.00234124	0.00702378	0.0210713	0.0632139	0.189642	0.568925	1.70678	5.12033	15.361	46.0829	Acarbose	GAA	alpha-Glucosidase Inhibitors	C[C@H]1O[C@H](O[C@H]2[C@H](O)[C@@H](O)[C@H](O[C@@H]2CO)O[C@H]3[C@H](O)[C@@H](O)C(O)O[C@@H]3CO)[C@H](O)[C@@H](O)[C@@H]1N[C@H]4\C=C(CO)/[C@@H](O)[C@H](O)[C@H]4O
NCGC00160519-02	Acipimox	NA	Niacin deravitive	s-ewing-osteo-TC71-1	activity	2.3	-2.4	-4.52921	4.95492	108.739	141.76	111.992	11	672.651	672.785	0.837367	0.0167922	143.26	141.281	145.11	136.189	141.15	133.523	145.96	144.933	145.771	140.233	111.992	0.000780415	0.00234124	0.00702378	0.0210713	0.0632139	0.189642	0.568925	1.70678	5.12033	15.361	46.0829	Acipimox	NA	Niacin deravitive	CC1=[N+]([O-])C=C(N=C1)C(O)=O
NCGC00160527-05	Mosapride citrate	HTR4	5-HT4 Antagonists	s-ewing-osteo-TC71-1	activity	1.3	2.4	-5.92921	0.3	151.068	112.068	112.494	11	612.135	613.446	0.867624	0.014669	111.068	122.513	118.524	123.382	125.57	124.197	125.845	130.959	136.549	141.431	112.494	0.000780415	0.00234124	0.00702378	0.0210713	0.0632139	0.189642	0.568925	1.70678	5.12033	15.361	46.0829	Mosapride citrate	HTR4	5-HT4 Antagonists	CCOC1=CC(=C(Cl)C=C1C(=O)NCC2CN(CCO2)CC3=CC=C(F)C=C3)N
NCGC00160529-05	Tizanidine hydrochloride	ADRA2A	alpha2-Adrenoceptor Agonists	s-ewing-osteo-TC71-1	activity	1.3	4	-5.87921	4.44947	119.336	108.147	118.415	11	537.725	540.359	0.798231	0.0317054	107.336	109.28	107.291	110.989	105.929	114.425	106.209	116.679	121.338	118.731	118.415	0.000780415	0.00234124	0.00702378	0.0210713	0.0632139	0.189642	0.568925	1.70678	5.12033	15.361	46.0829	Tizanidine hydrochloride	ADRA2A	alpha2-Adrenoceptor Agonists	ClC1=C(N\C2=N\CCN2)C3=NSN=C3C=C1
NCGC00160530-03	Toremifene	ESR1	Selective Estrogen Receptor Modulators (SERM)	s-ewing-osteo-TC71-1	activity	1.1	-1.2	-5.42921	1.88512	83.7833	124.349	87.268	11	551.833	550.032	0.943671	0.00047628	128.519	121.051	116.061	127.062	124.385	127.081	126.492	114.947	99.539	81.821	87.268	0.000780415	0.00234124	0.00702378	0.0210713	0.0632139	0.189642	0.568925	1.70678	5.12033	15.361	46.0829	Toremifene	ESR1	Selective Estrogen Receptor Modulators (SERM)	CN(C)CCOC1=CC=C(C=C1)/C(=C(/CCCl)C2=CC=CC=C2)C3=CC=CC=C3
NCGC00160531-01	Atorvastatin calcium	HMGCR	HMG-CoA Reductase Inhibitor	s-ewing-osteo-TC71-1	activity	4	-2.1	-4.82921	1.6259	-5.41083	126.932	12.0172	11	534.581	533.652	0.922298	0.00149328	131.388	129.753	133.275	130.304	96.0897	139.318	128.342	122.898	105.387	60.5218	12.0172	0.000780415	0.00234124	0.00702378	0.0210713	0.0632139	0.189642	0.568925	1.70678	5.12033	15.361	46.0829	Atorvastatin calcium	HMGCR	HMG-CoA Reductase Inhibitor	[H][C@@](O)(CCN1C(C(C)C)=C(C(=O)NC2=CC=CC=C2)C(=C1C3=CC=C(F)C=C3)C4=CC=CC=C4)C[C@@]([H])(O)CC([O-])=O
NCGC00160670-04	Mecarbinate	NA	antiinfluenza drug	s-ewing-osteo-TC71-1	activity	2.3	-3	-4.42921	0.8	66.8348	145.436	87.4515	11	663.493	646.329	0.548026	0.215207	151.879	136.718	137.459	134.35	150.063	138.706	122.584	137.992	132.918	137.691	87.4515	0.000780415	0.00234124	0.00702378	0.0210713	0.0632139	0.189642	0.568925	1.70678	5.12033	15.361	46.0829	Mecarbinate	NA	antiinfluenza drug	CCOC(=O)C1=C(C)[N](C)C2=CC=C(O)C=C12
NCGC00161290-05	16	16-dimethyl PGE2	NA	s-ewing-osteo-TC71-1	activity	2.1	-2.2	-4.72921	2.25265	85.5119	125.906	88.2174	11	586.745	586.327	0.901514	0.0033711	124.146	130.106	127.377	121.516	126.326	133.02	124.67	119.521	121.59	112.024	88.2174	0.000780415	0.00234124	0.00702378	0.0210713	0.0632139	0.189642	0.568925	1.70678	5.12033	15.361	46.0829	16	16-dimethyl PGE2	NA	prostaglandin	CCCCC(C)(C)[C@H](O)/C=C/[C@H]1[C@H](O)CC(=O)[C@@H]1C\C=C/CCCC(O)=O
NCGC00161327-05	Calcitriol	VDR	Vitamin D Analog	s-ewing-osteo-TC71-1	activity	4	-1.1	-5.52921	2.04786	10.8816	135.348	5.779	11	497.588	499.747	0.994447	6.4e-08	133.343	136.375	128.675	134.872	139.445	137.471	134.058	104.068	41.3307	21.135	5.779	0.000780415	0.00234124	0.00702378	0.0210713	0.0632139	0.189642	0.568925	1.70678	5.12033	15.361	46.0829	Calcitriol	VDR	Vitamin D Analog	C[C@H](CCCC(C)(C)O)[C@H]1CC[C@H]2C(/CCC[C@]12C)=C/C=C3/C[C@@H](O)C[C@H](O)C3=C
NCGC00161398-01	GW-441756	NTRK1	Tropomyosin Related Kinase A (TrkA) inhibitor	s-ewing-osteo-TC71-1	activity	2.3	4	-4.62921	4.50447	98.854	127.056	100.054	11	601.594	603.11	0.708828	0.0829257	121.056	120.738	119.129	126.202	132.967	126.185	132.272	134.466	130.672	123.443	100.054	0.000780415	0.00234124	0.00702378	0.0210713	0.0632139	0.189642	0.568925	1.70678	5.12033	15.361	46.0829	GW-441756	NTRK1	Tropomyosin Related Kinase A (TrkA) inhibitor	CN1C=C(\C=C2/C(=O)NC3=CC=CN=C23)C4=C1C=CC=C4
NCGC00161408-02	anagrelide	PDE3A	Phosphodiesterase III (PDE3) inhibitor	s-ewing-osteo-TC71-1	activity	2.1	-2.2	-4.67921	4.09497	47.3202	126.892	53.0907	11	580.488	582.609	0.981723	6.8621e-06	124.248	124.46	124.74	126.177	131.254	131.653	123.281	126.192	129.264	111.459	53.0907	0.000780415	0.00234124	0.00702378	0.0210713	0.0632139	0.189642	0.568925	1.70678	5.12033	15.361	46.0829	anagrelide	PDE3A	Phosphodiesterase III (PDE3) inhibitor	ClC1=CC=C2N/C3=N/C(=O)CN3CC2=C1Cl
NCGC00161410-02	CCT-018159	HSP90AB1	Heat Shock Protein 90 (hsp90) Inhibitor	s-ewing-osteo-TC71-1	activity	1.1	-1.1	-5.07921	2.33317	32.4141	119.08	38.79	11	504.582	505.474	0.956308	0.000187727	116.527	107.697	110.011	118.369	122.035	126.542	128.261	121.704	98.7102	45.5543	38.79	0.000780415	0.00234124	0.00702378	0.0210713	0.0632139	0.189642	0.568925	1.70678	5.12033	15.361	46.0829	CCT-018159	HSP90AB1	Heat Shock Protein 90 (hsp90) Inhibitor	CCC1=C(O)C=C(O)C(=C1)C2=NNC(C)=C2C3=CC4=C(OCCO4)C=C3
NCGC00161414-02	Tropisetron	HTR3A	5-HT3 Antagonists	s-ewing-osteo-TC71-1	activity	2.1	-2.2	-4.72921	1.21	55.5296	136.229	68.2294	11	611.798	614.083	0.919933	0.00165831	131.729	140.356	137.774	133.333	143.184	143.044	129.265	129.435	115.569	110.052	68.2294	0.000780415	0.00234124	0.00702378	0.0210713	0.0632139	0.189642	0.568925	1.70678	5.12033	15.361	46.0829	Tropisetron	HTR3A	5-HT3 Antagonists	CN1[C@H]2CC[C@@H]1CC(C2)OC(=O)C3=C[NH]C4=CC=CC=C34
NCGC00161418-02	JTC-801	OPRL1	ORL1 (OP4	s-ewing-osteo-TC71-1	activity	4	-1.1	-5.12921	4.95492	2.55508	117.562	4.63207	11	472.614	476.808	0.98491	3.2595e-06	108.482	119.082	114.595	115.516	125.504	125.699	122.038	110.115	104.109	5.78403	4.63207	0.000780415	0.00234124	0.00702378	0.0210713	0.0632139	0.189642	0.568925	1.70678	5.12033	15.361	46.0829	JTC-801	OPRL1	ORL1 (OP4	NOP) Antagonists	CCC1=CC=C(OCC2=C(C=CC=C2)C(=O)NC3=CC4=C(C=C3)N=C(C)C=C4N)C=C1
NCGC00161419-03	Trimetrexate	DHFR	Dihydrofolate Reductase (DHFR) Inhibitors	s-ewing-osteo-TC71-1	activity	4	-1.1	-6.07921	2.72022	24.6851	114.225	23.2742	11	390.019	391.083	0.988365	1.1807e-06	111.455	104.349	113.668	118.539	116.635	120.575	88.0623	37.5671	27.5495	23.634	23.2742	0.000780415	0.00234124	0.00702378	0.0210713	0.0632139	0.189642	0.568925	1.70678	5.12033	15.361	46.0829	Trimetrexate	DHFR	Dihydrofolate Reductase (DHFR) Inhibitors	COC1=C(OC)C(=CC(=C1)NCC2=C(C)C3=C(C=C2)N=C(N)N=C3N)OC
NCGC00161599-11	Troglitazone	CCL2	CCL2 Expression Inhibitor	s-ewing-osteo-TC71-1	activity	2.3	4	-4.47921	4.95492	94.4581	127.655	99.991	11	605.646	608.779	0.719611	0.0755661	117.655	122.37	124.652	126.713	128.174	129.737	133.58	127.413	136.714	130.339	99.991	0.000780415	0.00234124	0.00702378	0.0210713	0.0632139	0.189642	0.568925	1.70678	5.12033	15.361	46.0829	Troglitazone	CCL2	CCL2 Expression Inhibitor	CC1=C(O)C(=C2CCC(C)(COC3=CC=C(CC4SC(=O)NC4=O)C=C3)OC2=C1C)C
NCGC00161602-05	Doxycycline	MMP1	Matrix Metalloproteinase Inhibitors	s-ewing-osteo-TC71-1	activity	2.1	-2.2	-4.72921	2.72022	61.8983	116.923	62.6712	11	537.584	538.015	0.951317	0.00027989	112.423	112.417	117.001	117.448	123.855	113.627	116.357	122.005	114.743	97.9729	62.6712	0.000780415	0.00234124	0.00702378	0.0210713	0.0632139	0.189642	0.568925	1.70678	5.12033	15.361	46.0829	Doxycycline	MMP1	Matrix Metalloproteinase Inhibitors	C[C@@H]1[C@H]\2[C@H](O)[C@H]3[C@H](N(C)C)\C(=C(C(N)=O)/C(=O)[C@@]3(O)\C(=C2C(=O)C4=C(O)C=CC=C14)O)O
NCGC00161630-02	Novobiocin sodium	HSP90AB1	Heat Shock Protein 90 (hsp90) Inhibitor	s-ewing-osteo-TC71-1	activity	1.3	-2.2	-5.32921	1.98874	99.4812	136.711	95.0195	11	618.734	620.681	0.843942	0.0147892	129.117	127.041	133.692	137.066	139.651	142.197	146.894	132.243	113.9	109.08	95.0195	0.000780415	0.00234124	0.00702378	0.0210713	0.0632139	0.189642	0.568925	1.70678	5.12033	15.361	46.0829	Novobiocin sodium	HSP90AB1	Heat Shock Protein 90 (hsp90) Inhibitor	CO[C@@H]1[C@@H](OC(N)=O)[C@@H](O)[C@H](OC2=CC=C3\C(=C(NC(=O)C4=CC=C([O-])C(=C4)CC=C(C)C)/C(=O)OC3=C2C)O)OC1(C)C
NCGC00161634-07	Artemisinin	NA	antimalarial agents	s-ewing-osteo-TC71-1	activity	1.1	-2.2	-5.42921	1	63.641	123.38	65.8081	11	523.616	524.832	0.958177	0.00015971	121.644	119.539	125.6	123.889	117.169	131.098	114.187	103.253	87.1992	79.4483	65.8081	0.000780415	0.00234124	0.00702378	0.0210713	0.0632139	0.189642	0.568925	1.70678	5.12033	15.361	46.0829	Artemisinin	NA	antimalarial agents	C[C@@H]1CC[C@H]2[C@@H](C)C(=O)O[C@@H]3O[C@@]4(C)CC[C@@H]1[C@@]23OO4
NCGC00161641-04	Sinomenine	NA	Antiinflammatory opioid	s-ewing-osteo-TC71-1	activity	1.1	-1.1	-5.47921	3.67725	38.5182	119.013	33.5812	11	476.67	478.326	0.980375	9.0322e-06	115.619	111.884	114.502	125.251	121.89	125.692	118.764	111.231	50.726	45.4924	33.5812	0.000780415	0.00234124	0.00702378	0.0210713	0.0632139	0.189642	0.568925	1.70678	5.12033	15.361	46.0829	Sinomenine	NA	Antiinflammatory opioid	COC/1=C/[C@@H]2[C@@H]3CC4=C(C(=C(OC)C=C4)O)[C@]2(CCN3C)CC1=O
NCGC00161670-06	Pepstatin	NA	Aspartyl Protease Inhibitor	s-ewing-osteo-TC71-1	activity	1.3	4	-6.82921	1.4641	138.658	127.158	125.259	11	640.276	638.537	0.655425	0.148713	125.658	127.667	126.68	130.141	130.863	131.098	140.864	139.543	143.351	130.395	125.259	0.000780415	0.00234124	0.00702378	0.0210713	0.0632139	0.189642	0.568925	1.70678	5.12033	15.361	46.0829	Pepstatin	NA	Aspartyl Protease Inhibitor	OC(=O)C[C@H](O)[C@@H](NC(=O)[C@H](C)NC(=O)C[C@H](O)[C@H](CC(C)C)NC(=O)[C@@H](NC(=O)[C@@H](NC(=O)CC(C)C)C(C)C)C(C)C)CC(C)C
NCGC00161679-01	MG-132	PSMD1	Proteasome Inhibitor	s-ewing-osteo-TC71-1	activity	4	-1.1	-6.22921	2.72022	4.60855	117.495	2.17679	11	347.155	348.494	0.995949	1.83e-08	112.711	116.241	115.365	117.138	121.773	117.911	61.1847	15.7061	4.05832	3.4271	2.17679	0.000780415	0.00234124	0.00702378	0.0210713	0.0632139	0.189642	0.568925	1.70678	5.12033	15.361	46.0829	MG-132	PSMD1	Proteasome Inhibitor	CC(C)C[C@H](NC(=O)[C@H](CC(C)C)NC(=O)[C@H](CC(C)C)NC(=O)OCC1=CC=CC=C1)C=O
NCGC00161703-02	NCGC00161703	NFKB1	NF-kB/AP-1 activation inhibitor	s-ewing-osteo-TC71-1	activity	4	-1.1	-6.12921	0.5	-14.6072	127.31	2.11091	11	342.035	343.04	0.973196	2.9884e-05	116.618	120.905	118.24	114.9	96.0235	68.1069	53.6262	51.4193	33.8263	2.40912	2.11091	0.000780415	0.00234124	0.00702378	0.0210713	0.0632139	0.189642	0.568925	1.70678	5.12033	15.361	46.0829	NCGC00161703	NFKB1	NF-kB/AP-1 activation inhibitor	COC1=CC=CC2=C1C(=NC(=N2)C3=CC=CS3)NN4C(=O)\C=C(C)/C4=O
NCGC00161825-02	GSK-3965	ABCA1	ABCA1 Expression Enhancer	s-ewing-osteo-TC71-1	activity	4	-2.1	-4.67921	4.09497	14.8948	131.02	23.4361	11	586.807	588.513	0.959995	0.000135322	122.754	125.161	125.047	131.845	135.12	136.223	137.191	141.522	121.146	105.375	23.4361	0.000780415	0.00234124	0.00702378	0.0210713	0.0632139	0.189642	0.568925	1.70678	5.12033	15.361	46.0829	GSK-3965	ABCA1	ABCA1 Expression Enhancer	OC(=O)CC1=CC=CC(=C1)OCCCN(CC(C2=CC=CC=C2)C3=CC=CC=C3)CC4=CC=CC(=C4Cl)C(F)(F)F
NCGC00161834-01	Budesonide	NA	Glucocorticoid steroid	s-ewing-osteo-TC71-1	activity	1.3	-2.2	-4.87921	2.09374	89.4629	132.008	92.6222	11	609.147	610.171	0.80404	0.0289669	128.53	134.763	125.047	138.188	118.862	143.068	131.73	136.798	126.013	106.936	92.6222	0.000780415	0.00234124	0.00702378	0.0210713	0.0632139	0.189642	0.568925	1.70678	5.12033	15.361	46.0829	Budesonide	NA	Glucocorticoid steroid	[H][C@@]12CC3OC(CCC)O[C@@]3(C(=O)CO)[C@@]1(C)CC(O)[C@@]4([H])[C@@]2([H])CCC5=CC(=O)C=C[C@]45C
NCGC00161923-04	Picropodophyllin	IGFR1	Antimitotic Agent; IGF-1R Inhibitors	s-ewing-osteo-TC71-1	activity	4	-1.1	-6.72921	3.132	24.0904	119.235	28.0935	11	342.042	341.723	0.987066	1.7864e-06	117.658	109.775	118.494	125.946	124.816	66.3202	20.7971	23.9567	24.3673	26.782	28.0935	0.000780415	0.00234124	0.00702378	0.0210713	0.0632139	0.189642	0.568925	1.70678	5.12033	15.361	46.0829	Picropodophyllin	IGFR1	Antimitotic Agent; IGF-1R Inhibitors	COC1=C(OC)C(=CC(=C1)[C@H]2[C@H]3[C@H](COC3=O)[C@@H](O)C4=C2C=C5OCOC5=C4)OC
NCGC00161927-03	4-Demethylepipodophyllotoxin	TUBB	Antimitotic Agent	s-ewing-osteo-TC71-1	activity	4	-1.1	-7.37921	3.06545	26.9109	115.555	16.1281	11	282.258	286.052	0.9835	4.6135e-06	112.403	121.192	111.589	106.637	48.5674	23.4732	28.6184	26.331	32.0238	35.6409	16.1281	0.000780415	0.00234124	0.00702378	0.0210713	0.0632139	0.189642	0.568925	1.70678	5.12033	15.361	46.0829	4-Demethylepipodophyllotoxin	TUBB	Antimitotic Agent	COC1=C(O)C(=CC(=C1)[C@H]2C3C(COC3=O)[C@H](O)C4=C2C=C5OCOC5=C4)OC
NCGC00162073-05	H-89	AKT1	PKB/Akt Inhibitor	s-ewing-osteo-TC71-1	activity	4	-1.1	-5.57921	4.95492	8.64296	122.502	2.25831	11	445.251	445.428	0.984198	3.8999e-06	125.04	121.81	123.29	129.154	123.369	113.319	117.437	115.373	5.01798	20.9851	2.25831	0.000780415	0.00234124	0.00702378	0.0210713	0.0632139	0.189642	0.568925	1.70678	5.12033	15.361	46.0829	H-89	AKT1	PKB/Akt Inhibitor	[O-][S+](=O)(NCCNC\C=C\C1=CC=C(Br)C=C1)C2=CC=CC3=CN=CC=C23
NCGC00162094-04	Betamethasone	NA	Antiinflammatory; glucocorticoid receptor antagonist	s-ewing-osteo-TC71-1	activity	2.3	4	-4.67921	0.8	105.464	129.364	112.614	11	607.343	604.517	0.580857	0.186637	133.364	123.009	122.605	130.556	133.135	126.601	132.772	124.021	120.515	122.445	112.614	0.000780415	0.00234124	0.00702378	0.0210713	0.0632139	0.189642	0.568925	1.70678	5.12033	15.361	46.0829	Betamethasone	NA	Antiinflammatory; glucocorticoid receptor antagonist	C[C@H]1CC2C3CCC/4=C/C(=O)/C=C\[C@]4(C)[C@@]3(F)[C@@H](O)C[C@]2(C)[C@@]1(O)C(=O)CO
NCGC00162142-03	SD-169	MAPK14	p38 MAPK Inhibitor	s-ewing-osteo-TC71-1	activity	5	4	NA	NA	NA	NA	129.926	11	NA	653.412	NA	NA	139.647	136.826	138.932	124.253	145.923	142.526	135.451	137.659	126.779	136.704	129.926	0.000780415	0.00234124	0.00702378	0.0210713	0.0632139	0.189642	0.568925	1.70678	5.12033	15.361	46.0829	SD-169	MAPK14	p38 MAPK Inhibitor	NC(=O)C1=CC=C2[NH]C=CC2=C1
NCGC00162225-05	L-tetramisol	CHRNA3	Nicotinic Receptor Agonist	s-ewing-osteo-TC71-1	activity	1.3	4	-6.52921	1	123.949	113.449	123.689	11	568.719	569.531	0.448455	0.306481	110.449	117.041	110.573	119.284	114.871	112.306	118.76	134.515	120.114	119.965	123.689	0.000780415	0.00234124	0.00702378	0.0210713	0.0632139	0.189642	0.568925	1.70678	5.12033	15.361	46.0829	L-tetramisol	CHRNA3	Nicotinic Receptor Agonist	C1CN\2C[C@@H](\N=C2S1)C3=CC=CC=C3
NCGC00162249-04	MK-886	ALOX5AP	5-lipoxygenase-activating (FLAP) inhibitor	s-ewing-osteo-TC71-1	activity	2.1	-2.2	-4.67921	1.4641	55.3781	132.644	72.3143	11	601.834	599.711	0.940793	0.000569955	139.376	139.635	132.181	124.432	128.32	134.525	131.418	128.406	120.271	106.532	72.3143	0.000780415	0.00234124	0.00702378	0.0210713	0.0632139	0.189642	0.568925	1.70678	5.12033	15.361	46.0829	MK-886	ALOX5AP	5-lipoxygenase-activating (FLAP) inhibitor	CC(C)C1=CC=C2[N](CC3=CC=C(Cl)C=C3)C(=C(SC(C)(C)C)C2=C1)CC(C)(C)C([O-])=O
NCGC00162288-06	Valproic acid sodium salt	GSK3B	GSK-3 inhibitor	s-ewing-osteo-TC71-1	activity	1.3	2.4	-6.37921	0.2	151.973	109.973	130.152	11	622.687	625.012	0.666839	0.138632	113.973	122.481	119.607	131.882	127.988	132.854	124.607	127.06	138.998	144.514	130.152	0.000780415	0.00234124	0.00702378	0.0210713	0.0632139	0.189642	0.568925	1.70678	5.12033	15.361	46.0829	Valproic acid sodium salt	GSK3B	GSK-3 inhibitor	CCCC(CCC)C([O-])=O
NCGC00162381-03	Thapsigargin	ATP2A1	SERCA inhibitor	s-ewing-osteo-TC71-1	activity	4	-1.1	-7.27921	1.6259	8.03034	113.999	0.663308	11	232.392	234.986	0.9879	1.3763e-06	105.907	115.601	116.271	95.4796	46.9136	24.7324	14.0783	13.4667	8.67963	3.95189	0.663308	0.000780415	0.00234124	0.00702378	0.0210713	0.0632139	0.189642	0.568925	1.70678	5.12033	15.361	46.0829	Thapsigargin	ATP2A1	SERCA inhibitor	[H][C@]12[C@H](OC(=O)CCCCCCC)[C@@H](OC(=O)C(\C)=C/C)C(C)=C1[C@@H]3OC(=O)[C@@](C)(O)[C@@]3(O)[C@H](C[C@]2(C)OC(C)=O)OC(=O)CCC
NCGC00162383-02	Vancomycin hydrochloride	NA	glycopeptide antibiotic	s-ewing-osteo-TC71-1	activity	1.3	4	-6.27921	3.06545	132.721	117.54	131.463	11	595.037	594.671	0.806231	0.028138	119.221	110.32	119.406	116.275	124.435	116.687	125.464	135.429	130.377	132.876	131.463	0.000780415	0.00234124	0.00702378	0.0210713	0.0632139	0.189642	0.568925	1.70678	5.12033	15.361	46.0829	Vancomycin hydrochloride	NA	glycopeptide antibiotic	CN[C@H](CC(C)C)C(=O)N[C@@H]1[C@H](O)C2=CC=C(OC3=CC4=CC(=C3O[C@@H]5O[C@H](CO)[C@@H](O)[C@H](O)[C@H]5O[C@H]6C[C@](C)(N)[C@H](O)[C@H](C)O6)OC7=C(Cl)C=C(C=C7)[C@@H](O)[C@@H]8NC(=O)[C@H](NC(=O)[C@@H]4NC(=O)[C@H](CC(N)=O)NC1=O)C9=CC=C(O)C(=C9)C%10=C(C=C(O)C=C%10O)[C@H](NC8=O)C(O)=O)C(=C2)Cl
NCGC00162385-05	Olprinone	PDE3A	Phosphodiesterase III (PDE3) Inhibitor	s-ewing-osteo-TC71-1	activity	1.3	4	-8.17921	4.95492	116.457	108.187	114.01	11	552.175	552.877	0.685996	0.100466	108.957	107.065	113.444	116.588	115.418	115.843	122.805	115.991	117.128	114.544	114.01	0.000780415	0.00234124	0.00702378	0.0210713	0.0632139	0.189642	0.568925	1.70678	5.12033	15.361	46.0829	Olprinone	PDE3A	Phosphodiesterase III (PDE3) Inhibitor	C\C1=C(\C=C(C#N)/C(=O)N1)C2=C[N]3C=CN=C3C=C2
NCGC00162409-03	Bafilomycin A1	NA	Vacuolar H+ ATPase (V-ATPase) Inhibitors	s-ewing-osteo-TC71-1	activity	4	-2.2	-4.67921	2.25265	-0.0737905	34.0228	2.71114	11	149.418	148.874	0.966263	7.17351e-05	37.5228	32.1677	33.0585	32.1543	32.7764	35.2991	35.2297	33.5445	33.5116	23.9658	2.71114	0.000780415	0.00234124	0.00702378	0.0210713	0.0632139	0.189642	0.568925	1.70678	5.12033	15.361	46.0829	Bafilomycin A1	NA	Vacuolar H+ ATPase (V-ATPase) Inhibitors	CO[C@H]1\C=C/C=C(/C)C[C@H](C)[C@H](O)[C@H](C)\C=C(C)/C=C(/OC)C(=O)O[C@@H]1[C@@H](C)[C@@H](O)[C@H](C)[C@@]2(O)C[C@@H](O)[C@H](C)[C@H](O2)C(C)C
NCGC00162423-04	Mithramycin	ADH1A	Alcohol Dehydrogenase Inhibitor	s-ewing-osteo-TC71-1	activity	4	4	NA	NA	NA	NA	2.62684	11	NA	17.1096	NA	NA	2.66698	4.08378	3.4297	3.56803	3.48287	3.6295	3.89545	3.84691	3.53635	3.54545	2.62684	0.000780415	0.00234124	0.00702378	0.0210713	0.0632139	0.189642	0.568925	1.70678	5.12033	15.361	46.0829	Mithramycin	ADH1A	Alcohol Dehydrogenase Inhibitor	CO[C@@H]([C@@H]1CC2=C(C(=C3C(=C(C)C(=CC3=C2)C[C@H]4C[C@H](O[C@H]5C[C@@H](O)[C@H](O)[C@@H](C)O5)[C@@H](O)[C@@H](C)O4)O)O)C(=O)[C@H]1O[C@@H]6C[C@H](O[C@@H]7C[C@H](O[C@@H]8C[C@](O)(CO)[C@@H](O)[C@H](C)O8)[C@@H](O)[C@H](C)O7)[C@@H](O)[C@H](C)O6)C(=O)[C@@H](O)[C@@H](C)O
NCGC00162440-01	Elactocin	NA	Antineoplastic Antibiotics	s-ewing-osteo-TC71-1	activity	4	-1.1	-7.65705	3.1925	11.2363	121.456	28.3289	11	383.589	403.951	0.983033	5.1411e-06	120.265	119.99	125.053	124.128	124.08	110.485	64.9132	6.46444	6.08135	5.97919	28.3289	3.11982e-05	9.36406e-05	0.000280968	0.000842857	0.00252857	0.00758567	0.022757	0.068271	0.204813	0.614439	1.84332	Elactocin	NA	Antineoplastic Antibiotics	CCC(\C=C\[C@@H]1OC(=O)C=C[C@@H]1C)=C\[C@H](C)C\C=C\C(C)=C\[C@@H](C)C(=O)[C@@H](C)[C@H](O)[C@@H](C)C\C(C)=C\C(O)=O
NCGC00162453-10	Trichostatin A	HDAC1	HDAC1 Inhibitor	s-ewing-osteo-TC71-1	activity	4	-1.1	-6.12921	1.88512	1.65617	138.839	2.73381	11	416.568	415.023	0.997403	3.1e-09	137.438	133.888	136.859	142.85	140.62	128.607	87.8337	18.9108	6.01599	3.976	2.73381	0.000780415	0.00234124	0.00702378	0.0210713	0.0632139	0.189642	0.568925	1.70678	5.12033	15.361	46.0829	Trichostatin A	HDAC1	HDAC1 Inhibitor	C[C@H](\C=C(C)\C=C\C(=O)NO)C(=O)C1=CC=C(C=C1)N(C)C
NCGC00163107-06	CITCO	NR1I3	Constitutive androstane receptor agonist	s-ewing-osteo-TC71-1	activity	2.3	-2.4	-4.67921	0.3	88.096	141.349	100.406	11	618.652	620.679	0.687199	0.0983868	138.874	140.223	135.635	140.9	127.808	129.854	124.495	119.071	129.962	125.838	100.406	0.000780415	0.00234124	0.00702378	0.0210713	0.0632139	0.189642	0.568925	1.70678	5.12033	15.361	46.0829	CITCO	NR1I3	Constitutive androstane receptor agonist	ClC1=CC=C(C=C1)C2=C(\C=N\OCC3=CC(=C(Cl)C=C3)Cl)[N]4C=CSC4=N2
NCGC00163125-07	Pregnenolone	NA	Steroid	s-ewing-osteo-TC71-1	activity	2.3	4	-4.72921	0.8	112.333	140.465	118.938	11	657.195	659.918	0.675741	0.107203	131.965	144.262	138.23	148.246	139.22	143.892	138.36	133.076	131.902	131.65	118.938	0.000780415	0.00234124	0.00702378	0.0210713	0.0632139	0.189642	0.568925	1.70678	5.12033	15.361	46.0829	Pregnenolone	NA	Steroid	CC(=O)[C@H]1CC[C@H]2[C@@H]3C/C=C4/C[C@@H](O)CC[C@]4(C)[C@H]3CC[C@]12C
NCGC00163127-05	Acitretin	NA	retinoid	s-ewing-osteo-TC71-1	activity	5	4	NA	NA	NA	NA	132.618	11	NA	629.103	NA	NA	128.842	136.264	126.971	129.466	129.57	127.969	135.665	132.635	130.357	129.062	132.618	0.000780415	0.00234124	0.00702378	0.0210713	0.0632139	0.189642	0.568925	1.70678	5.12033	15.361	46.0829	Acitretin	NA	retinoid	COC1=C(C)C(=C(\C=C\C(C)=C\C=C\C(C)=C\C(O)=O)C(=C1)C)C
NCGC00163128-07	Pioglitazone HCl	PPARG	PPARgamma Agonists?	s-ewing-osteo-TC71-1	activity	1.3	-1.2	-6.52921	0.3	113.719	157.981	120.096	11	658.244	659.099	0.884563	0.00570964	149.481	156.256	142.829	142.696	138.849	140.468	137.373	126.456	124.037	128.736	120.096	0.000780415	0.00234124	0.00702378	0.0210713	0.0632139	0.189642	0.568925	1.70678	5.12033	15.361	46.0829	Pioglitazone HCl	PPARG	PPARgamma Agonists?	CCC1=CN=C(CCOC2=CC=C(CC3SC(=O)NC3=O)C=C2)C=C1
NCGC00163135-04	Niguldipine	NA	L-type Ca2+ channel blocker	s-ewing-osteo-TC71-1	activity	4	-2.1	-4.67921	4.09497	-0.484324	124.298	9.02768	11	551.294	551.133	0.984195	3.9031e-06	127.928	127.865	130.015	118.131	126.626	118.55	126.123	119.979	120.458	98.2276	9.02768	0.000780415	0.00234124	0.00702378	0.0210713	0.0632139	0.189642	0.568925	1.70678	5.12033	15.361	46.0829	Niguldipine	NA	L-type Ca2+ channel blocker	COC(=O)C/1=C(C)/N/C(=C(\C1C2=CC(=CC=C2)[N+]([O-])=O)C(=O)OCCCN3CCC(CC3)(C4=CC=CC=C4)C5=CC=CC=C5)C
NCGC00163169-02	Pizotifen	NA	Antimigraine drugs	s-ewing-osteo-TC71-1	activity	2.3	-3	-4.52921	4.95492	86.9975	127.315	91.0577	11	601.287	601.294	0.72019	0.0751005	124.273	119.915	115.396	127.241	122.386	132.619	132.227	140.229	130.166	125.646	91.0577	0.000780415	0.00234124	0.00702378	0.0210713	0.0632139	0.189642	0.568925	1.70678	5.12033	15.361	46.0829	Pizotifen	NA	Antimigraine drugs	CN1CCC(CC1)=C2C3=C(CCC4=C2C=CC=C4)SC=C3
NCGC00163246-01	Huperizine A	ACHE	Acetylcholinesterase Inhibitors	s-ewing-osteo-TC71-1	activity	2.3	-2.2	-4.62921	1	85.8103	125.252	94.7745	11	582.128	578.047	0.868038	0.00879526	129.252	122.392	125.6	122.325	127.527	122.057	119.284	120.308	119.196	113.788	94.7745	0.000780415	0.00234124	0.00702378	0.0210713	0.0632139	0.189642	0.568925	1.70678	5.12033	15.361	46.0829	Huperizine A	ACHE	Acetylcholinesterase Inhibitors	C\C=C1/C2CC3=C(C=CC(=O)N3)C1(N)CC(C)=C2
NCGC00163318-03	Suramin sodium	FGF2	Fibroblast Growth Factor (FGF) Inhibitors	s-ewing-osteo-TC71-1	activity	1.3	4	-5.07921	0.7	121.974	142.032	126.15	11	663.88	663.946	0.775021	0.0427855	142.032	145.556	139.749	141.99	144.678	136.21	135.143	141.025	135.888	127.868	126.15	0.000780415	0.00234124	0.00702378	0.0210713	0.0632139	0.189642	0.568925	1.70678	5.12033	15.361	46.0829	Suramin sodium	FGF2	Fibroblast Growth Factor (FGF) Inhibitors	CC1=C(NC(=O)C2=CC=CC(=C2)NC(=O)NC3=CC=CC(=C3)C(=O)NC4=CC(=CC=C4C)C(=O)NC5=CC=C(C6=C5C(=CC(=C6)[S+](O)([O-])=O)[S+](O)([O-])=O)[S+](O)([O-])=O)C=C(C=C1)C(=O)NC7=CC=C(C8=CC(=CC(=C78)[S+](O)([O-])=O)[S+](O)([O-])=O)[S+](O)([O-])=O
NCGC00163329-04	Clopidogrel bisulfate	P2RY12	P2Y12 (P2T) Antagonists	s-ewing-osteo-TC71-1	activity	4	-3	-4.47921	4.95492	0.406024	117.767	19.7804	11	537.968	540.517	0.930555	0.00100659	108.295	110.584	106.734	114.068	117.016	129.944	131.206	124.301	117.843	115.669	19.7804	0.000780415	0.00234124	0.00702378	0.0210713	0.0632139	0.189642	0.568925	1.70678	5.12033	15.361	46.0829	Clopidogrel bisulfate	P2RY12	P2Y12 (P2T) Antagonists	COC(=O)[C@@H](N1CCC2=C(C1)C=CS2)C3=C(Cl)C=CC=C3
NCGC00163381-04	KN-62	CAMKK2	Ca2+/calmodulin dependent protein kinase inhibitor	s-ewing-osteo-TC71-1	activity	2.1	-2.1	-4.72921	1.96734	26.1307	122.805	33.4055	11	545.082	545.243	0.941877	0.00053297	124.341	135.805	123.561	121.771	121.599	117.512	125.547	117.264	105.793	92.5696	33.4055	0.000780415	0.00234124	0.00702378	0.0210713	0.0632139	0.189642	0.568925	1.70678	5.12033	15.361	46.0829	KN-62	CAMKK2	Ca2+/calmodulin dependent protein kinase inhibitor	CN(C(CC1=CC=C(O[S+]([O-])(=O)C2=C3C=CN=CC3=CC=C2)C=C1)C(=O)N4CCN(CC4)C5=CC=CC=C5)[S+]([O-])(=O)C6=CC=CC7=CN=CC=C67
NCGC00163409-05	Betulinic acid	CASP3	Caspase 3/8 Activators	s-ewing-osteo-TC71-1	activity	1.3	4	-5.62921	0.4	104.598	128.015	107.501	11	578.62	580.293	0.659389	0.120007	122.015	131.099	132.824	117.678	123.925	121.892	121.639	112.629	116.211	115.6	107.501	0.000780415	0.00234124	0.00702378	0.0210713	0.0632139	0.189642	0.568925	1.70678	5.12033	15.361	46.0829	Betulinic acid	CASP3	Caspase 3/8 Activators	CC(=C)[C@@H]1CC[C@@]2(CC[C@]3(C)[C@H](CC[C@@H]4[C@@]5(C)CC[C@H](O)C(C)(C)[C@@H]5CC[C@@]34C)[C@@H]12)C(O)=O
NCGC00163411-05	Triptolide	POLR2A	Inhibition of RNA polymerase II?mediated transcription	s-ewing-osteo-TC71-1	activity	4	4	NA	NA	NA	NA	1.40696	11	NA	26.0106	NA	NA	4.23638	6.93134	6.8587	6.8072	5.91682	5.54112	5.84996	5.48649	4.65187	3.54605	1.40696	0.000780415	0.00234124	0.00702378	0.0210713	0.0632139	0.189642	0.568925	1.70678	5.12033	15.361	46.0829	Triptolide	POLR2A	Inhibition of RNA polymerase II?mediated transcription	CC(C)[C@]12O[C@H]1[C@@H]3O[C@@]34[C@@]5(C)CC\C6=C(COC6=O)/[C@@H]5C[C@@H]7O[C@]47[C@@H]2O
NCGC00163415-03	Parthenolide	NFKB1	NF-kappaB Activation Modulator	s-ewing-osteo-TC71-1	activity	4	-2.1	-4.97921	2.58843	0.433098	133.413	2.13239	11	550.204	551.537	0.98341	4.7113e-06	123.51	143.597	139.908	128.619	133.537	130.568	136.979	124.538	117.174	38.0664	2.13239	0.000780415	0.00234124	0.00702378	0.0210713	0.0632139	0.189642	0.568925	1.70678	5.12033	15.361	46.0829	Parthenolide	NFKB1	NF-kappaB Activation Modulator	CC/1=C\CC[C@@]2(C)O[C@@H]2[C@H]3OC(=O)C(=C)[C@@H]3CC1
NCGC00163424-03	Tanespimycin	HSP90AB1	Heat Shock Protein 90 (hsp90) Inhibitor	s-ewing-osteo-TC71-1	activity	4	-2.1	-5.42921	0.9	3.52694	131.257	7.39143	11	480.746	482.983	0.973292	2.94767e-05	128.157	131.407	129.594	129.773	126.232	129.216	118.237	82.1251	50.2908	47.0875	7.39143	0.000780415	0.00234124	0.00702378	0.0210713	0.0632139	0.189642	0.568925	1.70678	5.12033	15.361	46.0829	Tanespimycin	HSP90AB1	Heat Shock Protein 90 (hsp90) Inhibitor	CO[C@H]1C[C@H](C)C\C2=C(NCC=C)\C(=O)\C=C(NC(=O)\C(=C\C=C/[C@H](OC)[C@@H](OC(N)=O)C(=C/[C@H](C)[C@H]1O)/C)C)/C2=O
NCGC00163431-03	CA-074 Me	CTSB	Cathepsin B Inhibitors	s-ewing-osteo-TC71-1	activity	4	-1.1	-5.17921	2.04786	-3.59008	128.28	4.92946	11	500.213	499.152	0.987018	1.8121e-06	130.217	127.186	125.891	133.76	134.024	128.507	127.28	109.538	83.4822	8.56546	4.92946	0.000780415	0.00234124	0.00702378	0.0210713	0.0632139	0.189642	0.568925	1.70678	5.12033	15.361	46.0829	CA-074 Me	CTSB	Cathepsin B Inhibitors	CCCNC(=O)[C@H]1O[C@@H]1C(=O)N[C@@H](C(C)CC)C(=O)N2CCC[C@H]2C(=O)OC
NCGC00163451-03	G?-6976	PRKCA	PKC inhibitor	s-ewing-osteo-TC71-1	activity	4	-1.1	-5.92921	0.5	-22.2755	119.687	1.38497	11	329.407	328.848	0.990961	4.381e-07	119.687	114.749	108.041	96.4683	92.3706	84.787	64.0184	39.4266	26.875	1.85977	1.38497	0.000780415	0.00234124	0.00702378	0.0210713	0.0632139	0.189642	0.568925	1.70678	5.12033	15.361	46.0829	G?-6976	PRKCA	PKC inhibitor	C[N]1C2=C(C=CC=C2)C3=C4C(=O)NCC4=C5C6=C(C=CC=C6)[N](CCC#N)C5=C13
NCGC00163468-06	Mitomycin C	NA	DNA Alkylating Agent	s-ewing-osteo-TC71-1	activity	4	-1.1	-7.37921	1.2221	1.72168	128.571	0.413953	11	227.917	226.713	0.993188	1.435e-07	131.186	123.076	115.317	86.8941	57.1585	8.72178	5.85239	4.73273	4.08728	3.49749	0.413953	0.000780415	0.00234124	0.00702378	0.0210713	0.0632139	0.189642	0.568925	1.70678	5.12033	15.361	46.0829	Mitomycin C	NA	DNA Alkylating Agent	CO[C@@]12[C@H](COC(N)=O)C/3=C(N1C[C@@H]4N[C@H]24)/C(=O)/C(=C(N)\C3=O)C
NCGC00163470-09	FK-506	NA	Macrolide Antibiotic	s-ewing-osteo-TC71-1	activity	1.1	-1.1	-5.72921	3.06545	43.649	122.016	58.4671	11	474.758	472.831	0.954093	0.000225331	119.906	115.598	113.107	124.005	126.499	129.462	124.52	89.2763	43.3664	31.6455	58.4671	0.000780415	0.00234124	0.00702378	0.0210713	0.0632139	0.189642	0.568925	1.70678	5.12033	15.361	46.0829	FK-506	NA	Macrolide Antibiotic	CO[C@@H]1C[C@@H](CC[C@H]1O)/C=C(C)/[C@H]2OC(=O)[C@@H]3CCCCN3C(=O)C(=O)[C@]4(O)O[C@H]([C@H](C[C@@H](C)C\C(=C\[C@@H](CC=C)C(=O)C[C@H](O)[C@H]2C)C)OC)[C@H](C[C@H]4C)OC
NCGC00163474-05	Cyclopamine	SMO	Smo Receptor Antagonist	s-ewing-osteo-TC71-1	activity	1.3	-2.4	-4.92921	1.37226	103.06	128.174	106.246	11	599.124	600.415	0.767501	0.0466226	124.674	136.939	128.768	120.256	127.116	129.078	130.743	126.702	121.077	114.382	106.246	0.000780415	0.00234124	0.00702378	0.0210713	0.0632139	0.189642	0.568925	1.70678	5.12033	15.361	46.0829	Cyclopamine	SMO	Smo Receptor Antagonist	C[C@@H]1CN[C@H]2[C@@H](C)[C@@]\3(CC[C@H]\4[C@@H]5C/C=C6/C[C@@H](O)CC[C@]6(C)[C@H]5CC4=C3C)O[C@@H]2C1
NCGC00163485-03	17_-hydroxy Wortmannin	PIK3CA	PI3K Inhibitor	s-ewing-osteo-TC71-1	activity	4	-2.1	-4.67921	1.88512	-4.43495	111.131	4.42258	11	484.407	482.551	0.951006	0.000286251	115.142	106.7	113.548	119.023	117.904	107.462	111.662	104.567	92.5165	77.8861	4.42258	0.000780415	0.00234124	0.00702378	0.0210713	0.0632139	0.189642	0.568925	1.70678	5.12033	15.361	46.0829	17_-hydroxy Wortmannin	PIK3CA	PI3K Inhibitor	COC[C@H]1OC(=O)C2=COC3=C2[C@@]1(C)\C4=C(C5CCC(=O)[C@@]5(C)C[C@H]4OC(C)=O)/C3=O
NCGC00163489-04	Shikonin	CCR5	Drugs Acting on Chemokine Receptors	s-ewing-osteo-TC71-1	activity	4	-1.1	-5.62921	3.132	-0.702856	126.811	3.49044	11	440.865	445.869	0.983409	0.0120474	116.576	126.31	130.694	129.072	124.553	123.808	139.963	89.1774	5.92046	57.1982	3.49044	0.000780415	0.00234124	0.00702378	0.0210713	0.0632139	0.189642	0.568925	1.70678	5.12033	15.361	46.0829	Shikonin	CCR5	Drugs Acting on Chemokine Receptors	CC(C)=CC[C@@H](O)C/1=C/C(=O)C2=C(O)C=CC(=C2C1=O)O
NCGC00163492-04	Cerulenin	FAS	Fatty acid synthase inhibitor	s-ewing-osteo-TC71-1	activity	2.3	-3	-4.62921	4.09497	82.3138	124.646	85.2965	11	585.16	587.021	0.835915	0.0172244	121.515	116.241	117.83	121.297	126.936	132.686	127.287	128.643	131.386	118.291	85.2965	0.000780415	0.00234124	0.00702378	0.0210713	0.0632139	0.189642	0.568925	1.70678	5.12033	15.361	46.0829	Cerulenin	FAS	Fatty acid synthase inhibitor	C\C=C\C\C=C\CCC(=O)[C@H]1O[C@H]1C(N)=O
NCGC00163505-03	G?-6983	PRKCA	PKC inhibitor	s-ewing-osteo-TC71-1	activity	1.3	-1.4	-7.52921	1.21	91.0973	118.418	66.8235	11	481.132	485.316	0.534917	0.227086	121.373	113.518	114	109.667	97.8312	92.9713	87.285	90.4841	101.258	111.099	66.8235	0.000780415	0.00234124	0.00702378	0.0210713	0.0632139	0.189642	0.568925	1.70678	5.12033	15.361	46.0829	G?-6983	PRKCA	PKC inhibitor	COC1=CC=C2[N](CCCN(C)C)C=C(C2=C1)C/3=C(/C(=O)NC3=O)C4=C[NH]C5=C4C=CC=C5
NCGC00163507-02	Octylonium bromide	NA	Muscarinic Antagonists	s-ewing-osteo-TC71-1	activity	2.1	-2.4	-4.72921	2.47293	99.1476	124.342	101.597	11	586.331	586.622	0.924215	0.00137697	123.842	122.799	126.436	122.772	125.776	122.623	122.852	128.974	121.799	115.208	101.597	0.000780415	0.00234124	0.00702378	0.0210713	0.0632139	0.189642	0.568925	1.70678	5.12033	15.361	46.0829	Octylonium bromide	NA	Muscarinic Antagonists	CCCCCCCCOC1=C(C=CC=C1)C(=O)NC2=CC=C(C=C2)C(=O)OCC[N+](C)(CC)CC
NCGC00163510-03	Aloe-emodin	CASP3	Caspase 3 Activators	s-ewing-osteo-TC71-1	activity	1.3	4	-7.42921	4.95492	116.682	127.638	119.378	11	579.204	578.015	0.72324	0.0734244	129.138	121.85	128.684	130.258	114.464	117.454	117.933	121.263	113.509	112.925	119.378	0.000780415	0.00234124	0.00702378	0.0210713	0.0632139	0.189642	0.568925	1.70678	5.12033	15.361	46.0829	Aloe-emodin	CASP3	Caspase 3 Activators	OCC1=CC2=C(C(=C1)O)C(=O)C3=C(C=CC=C3O)C2=O
NCGC00163532-01	Daidzin	ADH1	Alcohol Dehydrogenase Inhibitor	s-ewing-osteo-TC71-1	activity	1.3	4	-5.92921	1	132.205	120.07	108.104	11	597.021	594.882	0.531142	0.259869	127.205	120.146	120.609	114.175	114.306	125.775	125.901	124.651	130.519	131.573	108.104	0.000780415	0.00234124	0.00702378	0.0210713	0.0632139	0.189642	0.568925	1.70678	5.12033	15.361	46.0829	Daidzin	ADH1	Alcohol Dehydrogenase Inhibitor	OC[C@H]1O[C@@H](OC2=CC3=C(C=C2)C(=O)C(=CO3)C4=CC=C(O)C=C4)[C@H](O)[C@@H](O)[C@@H]1O
NCGC00163540-03	Hesperetin	NA	Lipid Lowering Agents	s-ewing-osteo-TC71-1	activity	1.1	-1.1	-5.02921	1.82648	25.2825	129.212	33.8842	11	543.89	542.812	0.975617	2.08139e-05	133.903	132.17	119.884	138.138	121.159	130.359	128.151	124.216	106.127	51.0677	33.8842	0.000780415	0.00234124	0.00702378	0.0210713	0.0632139	0.189642	0.568925	1.70678	5.12033	15.361	46.0829	Hesperetin	NA	Lipid Lowering Agents	COC1=CC=C(C=C1O)C/2=C/C(=O)C3=C(O2)C=C(O)C=C3O
NCGC00163547-02	Ecdysone	NA	Steroid prohormone	s-ewing-osteo-TC71-1	activity	1.3	4	-7.57921	4.95492	129.64	137.874	127.909	11	635.955	636.479	0.344742	0.397549	135.374	139.599	137.817	136.798	118.929	138.208	133.908	122.16	133.207	132.231	127.909	0.000780415	0.00234124	0.00702378	0.0210713	0.0632139	0.189642	0.568925	1.70678	5.12033	15.361	46.0829	Ecdysone	NA	Steroid prohormone	C[C@H]([C@H](O)CCC(C)(C)O)[C@H]1CC[C@@]2(O)C/3=C/C(=O)[C@@H]4C[C@@H](O)[C@@H](O)C[C@]4(C)[C@H]3CC[C@]12C
NCGC00163548-02	Echinomycin	NA	Antineoplastic Antibiotics	s-ewing-osteo-TC71-1	activity	4	-1.1	-8.57921	2.18762	4.90384	91.4729	2.92276	11	70.989	71.0392	0.998891	1e-10	85.2007	55.0063	13.8389	5.50943	5.76004	5.5857	5.28554	5.12311	4.29251	4.21079	2.92276	0.000780415	0.00234124	0.00702378	0.0210713	0.0632139	0.189642	0.568925	1.70678	5.12033	15.361	46.0829	Echinomycin	NA	Antineoplastic Antibiotics	CS[C@H]1SC[C@H]2N(C)C(=O)[C@@H](C)NC(=O)[C@H](COC(=O)[C@@H](C(C)C)N(C)C(=O)[C@@H]1N(C)C(=O)[C@@H](C)NC(=O)[C@H](COC(=O)[C@@H](C(C)C)N(C)C2=O)NC(=O)C3=NC4=CC=CC=C4N=C3)NC(=O)C5=NC6=CC=CC=C6N=C5
NCGC00163553-02	Evodiamine	NA	Alkaloid	s-ewing-osteo-TC71-1	activity	2.3	-2.2	-4.62921	1.1	77.6394	140.058	88.9118	11	643.175	643.17	0.831959	0.018487	145.274	139.135	135.585	151.076	138.162	141.742	136.858	128.53	126.716	126.521	88.9118	0.000780415	0.00234124	0.00702378	0.0210713	0.0632139	0.189642	0.568925	1.70678	5.12033	15.361	46.0829	Evodiamine	NA	Alkaloid	CN1C2N(CCC3=C2[NH]C4=C3C=CC=C4)C(=O)C5=C1C=CC=C5
NCGC00163567-03	Honokiol	NFKB1	NF-kappaB Activation Modulator	s-ewing-osteo-TC71-1	activity	2.3	-3	-4.47921	4.95492	73.8561	136.393	84.2337	11	640.621	641.893	0.893275	0.00440374	133.851	139.538	132.976	140.306	140.273	143.403	134.842	123.178	139.548	135.983	84.2337	0.000780415	0.00234124	0.00702378	0.0210713	0.0632139	0.189642	0.568925	1.70678	5.12033	15.361	46.0829	Honokiol	NFKB1	NF-kappaB Activation Modulator	OC1=CC=C(C=C1CC=C)C2=CC(=CC=C2O)CC=C
NCGC00163620-02	Sclareolide	NA	sesquiterpene natural product	s-ewing-osteo-TC71-1	activity	4	-1.3	-5.42921	4.95492	21.0521	140.062	22.7383	11	535.629	539.487	0.987805	0.417304	143.18	147.486	141.78	138.269	133.676	142.822	130.516	141.771	38.9164	135.839	22.7383	0.000780415	0.00234124	0.00702378	0.0210713	0.0632139	0.189642	0.568925	1.70678	5.12033	15.361	46.0829	Sclareolide	NA	sesquiterpene natural product	CC1(C)CCC[C@@]2(C)[C@H]1CC[C@@]3(C)OC(=O)C[C@H]23
NCGC00163633-03	Tetrahydropapaverine	NA	neurtotoxic	s-ewing-osteo-TC71-1	activity	2.1	-3	-4.57921	4.50447	61.7988	119.369	65.9271	11	556.931	557.142	0.959267	0.000144868	114.765	117.955	121.979	117.852	122.554	120.41	123.849	112.832	120.753	114.289	65.9271	0.000780415	0.00234124	0.00702378	0.0210713	0.0632139	0.189642	0.568925	1.70678	5.12033	15.361	46.0829	Tetrahydropapaverine	NA	neurtotoxic	COC1=C(OC)C=C(CC2NCCC3=C2C=C(OC)C(=C3)OC)C=C1
NCGC00163650-02	Cryptotanshinone	STAT3	STAT-3 Inhibitor	s-ewing-osteo-TC71-1	activity	2.1	-2.2	-4.62921	4.09497	39.1865	125.198	45.787	11	573.401	574.405	0.979691	1.0313e-05	122.664	122.2	118.175	125.119	130.445	126.473	128.066	125.531	128.69	111.572	45.787	0.000780415	0.00234124	0.00702378	0.0210713	0.0632139	0.189642	0.568925	1.70678	5.12033	15.361	46.0829	Cryptotanshinone	STAT3	STAT-3 Inhibitor	C[C@H]1COC/2=C1/C(=O)C(=O)C3=C4CCCC(C)(C)C4=CC=C23
NCGC00163683-02	Metenkephalin	NA	Opioid growth factor	s-ewing-osteo-TC71-1	activity	1.3	4	-6.42921	0.3	124.904	106.821	121.564	11	553.535	553.288	0.750069	0.0568377	110.404	104.918	115.09	115.065	111.174	114.113	115.608	118.263	120.638	119.758	121.564	0.000780415	0.00234124	0.00702378	0.0210713	0.0632139	0.189642	0.568925	1.70678	5.12033	15.361	46.0829	Metenkephalin	NA	Opioid growth factor	CSCC[C@@H](NC(=O)[C@@H](CC1=CC=CC=C1)NC(=O)CNC(=O)CNC(=O)[C@@H](N)CC2=CC=C(O)C=C2)C(O)=O
NCGC00163700-04	Vincristine sulfate	TUBB	Tubulin polymerization inhibitor	s-ewing-osteo-TC71-1	activity	4	-1.1	-8.47921	1.34372	26.5569	130.128	27.674	11	197.873	195.785	0.994161	7.81e-08	120.76	85.7192	54.0159	35.021	26.4638	24.4378	26.4362	24.7228	28.3303	28.9264	27.674	0.000780415	0.00234124	0.00702378	0.0210713	0.0632139	0.189642	0.568925	1.70678	5.12033	15.361	46.0829	Vincristine sulfate	TUBB	Tubulin polymerization inhibitor	CC[C@]1(O)C[C@H]2CN(CCC3=C([NH]C4=C3C=CC=C4)[C@@](C2)(C(=O)OC)C5=CC6=C(C=C5OC)N(C=O)[C@H]7[C@](O)([C@H](OC(C)=O)[C@]8(CC)\C=C/C[N@@]9CC[C@]67[C@H]89)C(=O)OC)C1
NCGC00164296-03	3-indolebutyric acid	NA	plant hormone	s-ewing-osteo-TC71-1	activity	2.3	4	-4.67921	1.1	110.938	134.52	114.535	11	634.419	634.367	0.621515	0.151155	132.52	131.983	133.11	141.809	128.727	141.96	132.535	130.808	127.415	129.191	114.535	0.000780415	0.00234124	0.00702378	0.0210713	0.0632139	0.189642	0.568925	1.70678	5.12033	15.361	46.0829	3-indolebutyric acid	NA	plant hormone	OC(=O)CCCC1=C[NH]C2=CC=CC=C12
NCGC00164336-05	L-Thyroxine	NA	synthetic hormone	s-ewing-osteo-TC71-1	activity	1.1	-2.4	-5.62921	2.72022	108.602	134.417	108.071	11	611.872	613.79	0.913869	0.00213762	127.917	134.459	137.805	134.469	132.821	131.527	141.257	127.026	111.578	109.483	108.071	0.000780415	0.00234124	0.00702378	0.0210713	0.0632139	0.189642	0.568925	1.70678	5.12033	15.361	46.0829	L-Thyroxine	NA	synthetic hormone	N[C@@H](CC1=CC(=C(OC2=CC(=C(O)C(=C2)I)I)C(=C1)I)I)C(O)=O
NCGC00164353-03	Mannitol	NA	osmotic diuretic agent	s-ewing-osteo-TC71-1	activity	1.3	4	-8.37921	0.4	130.663	109.163	121.545	11	603.213	604.16	0.494293	0.292888	113.163	124.42	116.024	128.258	125.532	120.65	126.433	137.12	125.451	130.724	121.545	0.000780415	0.00234124	0.00702378	0.0210713	0.0632139	0.189642	0.568925	1.70678	5.12033	15.361	46.0829	Mannitol	NA	osmotic diuretic agent	OC[C@@H](O)[C@@H](O)[C@H](O)[C@@H](O)CO
NCGC00164380-02	4-Hydroxyandrostenedione	CYP19A1	Aromatase Inhibitor	s-ewing-osteo-TC71-1	activity	2.3	-2.4	-4.67921	1.1	95.9133	134.826	106.149	11	627.976	627.65	0.797823	0.0316948	137.326	126.522	140.587	140.291	131.615	130.556	139.338	128.659	128.063	120.242	106.149	0.000780415	0.00234124	0.00702378	0.0210713	0.0632139	0.189642	0.568925	1.70678	5.12033	15.361	46.0829	4-Hydroxyandrostenedione	CYP19A1	Aromatase Inhibitor	O=C2CC[C@H]3[C@@H]4CCC1=C(O)C(=O)CC[C@]1(C)[C@H]4CC[C@]23C
NCGC00164385-04	Clomifene citrate	ESR1	Selective Estrogen Receptor Modulators (SERM)	s-ewing-osteo-TC71-1	activity	2.1	-3	-4.62921	4.50447	66.1624	120.762	68.8237	11	562.804	565.579	0.917592	0.00183348	109.17	123.228	124.292	120.564	120.498	124.725	124.744	123.948	115.825	113.466	68.8237	0.000780415	0.00234124	0.00702378	0.0210713	0.0632139	0.189642	0.568925	1.70678	5.12033	15.361	46.0829	Clomifene citrate	ESR1	Selective Estrogen Receptor Modulators (SERM)	CCN(CC)CCOC1=CC=C(C=C1)\C(=C(/Cl)C2=CC=CC=C2)C3=CC=CC=C3
NCGC00164447-01	Ciprofibrate	PPARA	PPARalpha Agonist	s-ewing-osteo-TC71-1	activity	2.3	-3	-4.21797	4.09497	85.8274	129.998	92.6157	11	635.195	636.035	0.864039	0.00965212	127.639	135.058	132.344	130.836	135.451	132.922	132.067	124.685	120.388	127.464	92.6157	0.00156083	0.00468253	0.0140476	0.0421426	0.126428	0.379284	1.13785	3.41355	10.2407	30.722	92.1659	Ciprofibrate	PPARA	PPARalpha Agonist	ClC2(Cl)CC2c1ccc(OC(C)(C)C(=O)O)cc1
NCGC00164547-06	Zafirlukast	CYSLTR1	Leukotriene CysLT1 (LTD4) Antagonist	s-ewing-osteo-TC71-1	activity	4	-2.1	-4.62921	4.09497	-4.88596	115.396	3.06659	11	514.977	517.682	0.96115	0.000121321	103.301	106.099	117.343	122.254	111.496	112.03	123.427	117.927	124.01	97.0124	3.06659	0.000780415	0.00234124	0.00702378	0.0210713	0.0632139	0.189642	0.568925	1.70678	5.12033	15.361	46.0829	Zafirlukast	CYSLTR1	Leukotriene CysLT1 (LTD4) Antagonist	Cc1ccccc1S(=O)(=O)NC(=O)c5ccc(Cc3cn(C)c2ccc(cc23)NC(=O)OC4CCCC4)c(OC)c5
NCGC00164549-01	Dofetilide	NA	K(V)11.1 (erg1) Channel Blocker	s-ewing-osteo-TC71-1	activity	4	-2.1	-4.77921	3.132	19.3481	134.729	21.2277	11	591.707	593.664	0.958651	0.000153008	125.265	125.375	127.209	131.104	136.371	134.892	147.413	143.759	139.413	83.901	21.2277	0.000780415	0.00234124	0.00702378	0.0210713	0.0632139	0.189642	0.568925	1.70678	5.12033	15.361	46.0829	Dofetilide	NA	K(V)11.1 (erg1) Channel Blocker	CS(=O)(=O)Nc1ccc(cc1)CCN(C)CCOc2ccc(cc2)NS(C)(=O)=O
NCGC00164550-01	Lafutidine	HRH2	Histamine H2 Receptor Antagonists	s-ewing-osteo-TC71-1	activity	2.3	4	-4.47921	4.95492	93.9227	119.321	98.1558	11	567.455	568.368	0.578054	0.188755	116.821	112.865	119.769	108.204	124.535	125.896	124.895	124.022	117.547	118.732	98.1558	0.000780415	0.00234124	0.00702378	0.0210713	0.0632139	0.189642	0.568925	1.70678	5.12033	15.361	46.0829	Lafutidine	HRH2	Histamine H2 Receptor Antagonists	O=S(CC(=O)NC/C=C\COc2cc(CN1CCCCC1)ccn2)Cc3ccco3
NCGC00164553-03	Clofarabine	NA	DNA Polymerase Inhibitors	s-ewing-osteo-TC71-1	activity	4	-1.4	-7.77921	0.9	5.20148	36.0058	8.0779	11	66.8981	66.791	0.971185	0.20507	33.5058	76.2713	28.1429	16.533	13.8312	8.50266	7.81799	5.45334	3.2522	4.23793	8.0779	0.000780415	0.00234124	0.00702378	0.0210713	0.0632139	0.189642	0.568925	1.70678	5.12033	15.361	46.0829	Clofarabine	NA	DNA Polymerase Inhibitors	NC1=NC(=NC2=C1N=C[N]2[C@@H]3O[C@H](CO)[C@@H](O)[C@@H]3F)Cl
NCGC00164559-04	Duloxetine hydrochloride	SLC6A4	Serotonin Transporter (SERT) Inhibitor	s-ewing-osteo-TC71-1	activity	4	-1.1	-5.57921	3.2975	5.66922	124.544	4.51953	11	447.206	447.969	0.996017	1.71e-08	119.489	123.475	125.442	126.184	130.898	126.715	119.471	98.2047	18.7036	7.46625	4.51953	0.000780415	0.00234124	0.00702378	0.0210713	0.0632139	0.189642	0.568925	1.70678	5.12033	15.361	46.0829	Duloxetine hydrochloride	SLC6A4	Serotonin Transporter (SERT) Inhibitor	CNCC[C@H](OC1=CC=CC2=C1C=CC=C2)C3=CC=CS3
NCGC00164561-03	Zanamivir	NA	Neuraminidase (Sialidase) Inhibitors	s-ewing-osteo-TC71-1	activity	1.3	1.4	-8.42921	0.91	122.256	98.2561	119.866	11	568.735	568.982	0.880614	0.00639275	102.256	107.562	115.002	118.192	118.329	123.621	118.887	119.498	124.227	127.251	119.866	0.000780415	0.00234124	0.00702378	0.0210713	0.0632139	0.189642	0.568925	1.70678	5.12033	15.361	46.0829	Zanamivir	NA	Neuraminidase (Sialidase) Inhibitors	CC(=O)N[C@@H]1[C@@H](NC(N)=N)\C=C(/O[C@H]1[C@H](O)[C@H](O)CO)C(O)=O
NCGC00164566-02	Pitavastatin calcium	HMGCR	HMG-CoA Reductase Inhibitor	s-ewing-osteo-TC71-1	activity	4	-1.1	-5.72921	2.72022	7.91026	115.91	9.9133	11	403.035	404.317	0.994821	4.85e-08	109.371	117.644	117.004	114.598	112.751	118.304	115.713	72.0559	9.6503	9.31109	9.9133	0.000780415	0.00234124	0.00702378	0.0210713	0.0632139	0.189642	0.568925	1.70678	5.12033	15.361	46.0829	Pitavastatin calcium	HMGCR	HMG-CoA Reductase Inhibitor	O[C@H](C[C@H](O)\C=C\C1=C(C2=CC=C(F)C=C2)C3=C(C=CC=C3)N=C1C4CC4)CC([O-])=O
NCGC00164569-03	Capecitabine	NA	Pyrimidine Antagonists	s-ewing-osteo-TC71-1	activity	2.3	-2.4	-4.52921	4.09497	96.1388	127.415	100.435	11	604.098	604.657	0.791644	0.0345114	129.415	132.957	130.285	124.496	121.487	130.686	125.457	133.095	120.895	125.561	100.435	0.000780415	0.00234124	0.00702378	0.0210713	0.0632139	0.189642	0.568925	1.70678	5.12033	15.361	46.0829	Capecitabine	NA	Pyrimidine Antagonists	CCCCCOC(=O)NC\1=N\C(=O)N(\C=C1F)[C@@H]2O[C@H](C)[C@@H](O)[C@H]2O
NCGC00164572-01	Rimonabant	CNR1	cannabinoid CB1 antagonist	s-ewing-osteo-TC71-1	activity	4	-2.1	-4.62921	4.09497	-3.33087	122.739	6.14438	11	548.366	548.022	0.992172	2.485e-07	124.585	120.239	118.217	118.914	123.713	129.191	122.783	121.718	124.571	103.435	6.14438	0.000780415	0.00234124	0.00702378	0.0210713	0.0632139	0.189642	0.568925	1.70678	5.12033	15.361	46.0829	Rimonabant	CNR1	cannabinoid CB1 antagonist	O=C(NN1CCCCC1)c4nn(c2ccc(Cl)cc2Cl)c(c3ccc(Cl)cc3)c4C
NCGC00164574-05	Erlotinib hydrochloride	EGFR	EGFR (HER1; erbB1) inhibitor	s-ewing-osteo-TC71-1	activity	4	-2.1	-4.82921	1.92824	4.34417	136.432	16.3565	11	582.348	582.187	0.993881	9.39e-08	138.931	136.144	141.306	133.598	138.184	137.297	129.894	134.958	119.358	70.609	16.3565	0.000780415	0.00234124	0.00702378	0.0210713	0.0632139	0.189642	0.568925	1.70678	5.12033	15.361	46.0829	Erlotinib hydrochloride	EGFR	EGFR (HER1; erbB1) inhibitor	COCCOC1=CC2=NC=NC(=C2C=C1OCCOC)NC3=CC=CC(=C3)C#C
NCGC00164576-03	Lopinavir	NA	HIV Protease Inhibitors	s-ewing-osteo-TC71-1	activity	2.1	-2.2	-4.62921	4.09497	43.5315	122.437	49.7898	11	562.476	563.088	0.956337	0.000187338	124.035	124.512	120.282	121.897	123.915	125.082	111.96	130.764	118.893	112.262	49.7898	0.000780415	0.00234124	0.00702378	0.0210713	0.0632139	0.189642	0.568925	1.70678	5.12033	15.361	46.0829	Lopinavir	NA	HIV Protease Inhibitors	CC(C)[C@H](N1CCCNC1=O)C(=O)N[C@H](C[C@H](O)[C@H](CC2=CC=CC=C2)NC(=O)COC3=C(C)C=CC=C3C)CC4=CC=CC=C4
NCGC00164588-03	Malotilate	NA	Liver Protein Metabolism	s-ewing-osteo-TC71-1	activity	2.3	4	-4.42921	4.95492	103.548	123.707	108.658	11	590.396	591.836	0.584702	0.183374	121.707	118.972	121.682	126.126	131.083	125.49	124.937	127.119	117.25	124.519	108.658	0.000780415	0.00234124	0.00702378	0.0210713	0.0632139	0.189642	0.568925	1.70678	5.12033	15.361	46.0829	Malotilate	NA	Liver Protein Metabolism	CC(C)OC(=O)C(C(=O)OC(C)C)=C1S\C=C/S1
NCGC00164590-03	Drospirenone	PGR	Synthetic progesterone	s-ewing-osteo-TC71-1	activity	2.3	4	-4.47921	4.95492	82.3367	116.873	87.9039	11	553.501	554.948	0.705056	0.0855297	112.873	111.118	115.675	118.097	121.493	128.637	116.725	107.185	120.654	116.618	87.9039	0.000780415	0.00234124	0.00702378	0.0210713	0.0632139	0.189642	0.568925	1.70678	5.12033	15.361	46.0829	Drospirenone	PGR	Synthetic progesterone	C[C@]\12CCC(=O)\C=C1[C@@H]3C[C@@H]3[C@@H]4[C@@H]2CC[C@@]5(C)[C@H]4[C@@H]6C[C@@H]6[C@@]57CCC(=O)O7
NCGC00164591-02	Artemether	NA	antimalarial agents	s-ewing-osteo-TC71-1	activity	1.1	-1.2	-5.32921	1.2221	65.8446	129	67.963	11	553.737	556.916	0.942964	0.000497945	120.592	135.851	121.977	131.369	126.18	136.112	129.871	110.172	96.1696	80.2166	67.963	0.000780415	0.00234124	0.00702378	0.0210713	0.0632139	0.189642	0.568925	1.70678	5.12033	15.361	46.0829	Artemether	NA	antimalarial agents	[H][C@@]1(C)CC[C@@]2([H])[C@@]([H])(C)[C@@]([H])(OC)O[C@]3([H])O[C@@]4(C)CC[C@]1([H])[C@@]23OO4
NCGC00164594-01	Loteprednol etabonate	NA	Corticosteroid	s-ewing-osteo-TC71-1	activity	1.3	4	-7.67921	0.4	116.4	100.775	99.5856	11	533.845	532.624	0.617499	0.18227	104.9	101.046	111.798	110.213	106.344	110.79	111.983	118.81	114.719	113.18	99.5856	0.000780415	0.00234124	0.00702378	0.0210713	0.0632139	0.189642	0.568925	1.70678	5.12033	15.361	46.0829	Loteprednol etabonate	NA	Corticosteroid	O=C(OCCl)[C@@]4(OC(=O)OCC)CC[C@@H]3[C@]4(C)C[C@H](O)[C@H]2[C@H]3CCC1=CC(=O)C=C[C@@]12C
NCGC00164600-03	Artesunate	NA	antimalarial agents	s-ewing-osteo-TC71-1	activity	4	-1.1	-5.87921	2.30312	11.0838	125.673	4.06782	11	423.104	423.77	0.989989	6.545e-07	125.034	117.438	125.134	130.158	131.901	120.301	113.348	47.7345	22.7856	14.5263	4.06782	0.000780415	0.00234124	0.00702378	0.0210713	0.0632139	0.189642	0.568925	1.70678	5.12033	15.361	46.0829	Artesunate	NA	antimalarial agents	C[C@@H]1CC[C@H]2[C@@H](C)[C@H](O[C@@H]3O[C@@]4(C)CC[C@@H]1[C@@]23OO4)OC(=O)CCC(O)=O
NCGC00164601-03	Liranaftate	NA	Fungal Squalene Monooxygenase Inhibitor	s-ewing-osteo-TC71-1	activity	1.3	1.4	-8.37921	0.6	117.213	93.7132	99.1841	11	540.926	540.254	0.813483	0.0367288	97.7132	106.985	108.231	107.131	112.05	115.723	120.342	117.544	118.715	112.271	99.1841	0.000780415	0.00234124	0.00702378	0.0210713	0.0632139	0.189642	0.568925	1.70678	5.12033	15.361	46.0829	Liranaftate	NA	Fungal Squalene Monooxygenase Inhibitor	COC1=NC(=CC=C1)N(C)C(=S)OC2=CC=C3CCCCC3=C2
NCGC00164604-03	Fluvastatin	HMGCR	HMG-CoA Reductase Inhibitors	s-ewing-osteo-TC71-1	activity	4	-1.1	-5.47921	2.24812	23.2838	125.518	24.0359	11	482.749	483.886	0.991914	2.825e-07	118.055	128.19	128.627	122.737	122.774	127.045	130.643	104.131	51.5244	25.6768	24.0359	0.000780415	0.00234124	0.00702378	0.0210713	0.0632139	0.189642	0.568925	1.70678	5.12033	15.361	46.0829	Fluvastatin	HMGCR	HMG-CoA Reductase Inhibitors	CC(C)[N]1C2=CC=CC=C2C(=C1\C=C\[C@H](O)C[C@H](O)CC([O-])=O)C3=CC=C(F)C=C3
NCGC00164613-03	Epalrestat	AKR1B1	Aldose Reductase Inhibitor	s-ewing-osteo-TC71-1	activity	1.3	4	-5.37921	1.69245	123.502	135.31	122.553	11	637.595	637.773	0.547116	0.216937	135.31	139.147	130.244	132.438	135.674	132.226	144.975	129.282	128.88	125.812	122.553	0.000780415	0.00234124	0.00702378	0.0210713	0.0632139	0.189642	0.568925	1.70678	5.12033	15.361	46.0829	Epalrestat	AKR1B1	Aldose Reductase Inhibitor	CC(=C/C1=CC=CC=C1)\C=C2/SC(=S)N(CC(O)=O)C2=O
NCGC00164615-03	Prulifloxacin	NA	Antibacterial	s-ewing-osteo-TC71-1	activity	2.3	4	-4.72921	2.04374	113.692	125.367	115.305	11	597.176	597.788	0.313119	0.424348	123.367	131.972	126.858	121.844	119.648	135.078	119.022	125.341	124.701	120.542	115.305	0.000780415	0.00234124	0.00702378	0.0210713	0.0632139	0.189642	0.568925	1.70678	5.12033	15.361	46.0829	Prulifloxacin	NA	Antibacterial	CC1SC/2=C(C(O)=O)/C(=O)C3=CC(=C(C=C3N12)N4CCN(CC4)C\C5=C(C)\OC(=O)O5)F
NCGC00164617-05	Adapalene	NA	topical retinoid	s-ewing-osteo-TC71-1	activity	1.3	-1.2	-5.52921	4.95492	84.4659	133.857	97.7047	11	582.739	582.493	0.884806	0.00565876	121.679	136.921	129.108	133.658	134.664	145.71	133.876	130.976	86.8301	72.1598	97.7047	0.000780415	0.00234124	0.00702378	0.0210713	0.0632139	0.189642	0.568925	1.70678	5.12033	15.361	46.0829	Adapalene	NA	topical retinoid	COC1=CC=C(C=C1C23CC4CC(CC(C4)C2)C3)C5=CC=C6C=C(C=CC6=C5)C(O)=O
NCGC00164619-04	Anastrozole	CYP19A1	Aromatase Inhibitor	s-ewing-osteo-TC71-1	activity	1.3	4	-5.92921	4.95492	123.572	137.061	124.995	11	636.514	637.37	0.85513	0.0118177	135.061	134.195	137.683	134.485	143.724	138.254	137.407	124.992	124.911	120.904	124.995	0.000780415	0.00234124	0.00702378	0.0210713	0.0632139	0.189642	0.568925	1.70678	5.12033	15.361	46.0829	Anastrozole	CYP19A1	Aromatase Inhibitor	CC(C)(C#N)C1=CC(=CC(=C1)C[N]2C=NC=N2)C(C)(C)C#N
NCGC00164622-04	Voriconazole	CYP51A1	Lanosterol 14alpha-demethylase Inhibitors	s-ewing-osteo-TC71-1	activity	1.3	4	-6.62921	4.95492	115.924	127.104	113.464	11	585.228	587.083	0.68975	0.0968367	124.604	122.984	129.492	131.6	127.166	124.76	110.704	114.095	121.513	120.694	113.464	0.000780415	0.00234124	0.00702378	0.0210713	0.0632139	0.189642	0.568925	1.70678	5.12033	15.361	46.0829	Voriconazole	CYP51A1	Lanosterol 14alpha-demethylase Inhibitors	C[C@@H](C1=NC=NC=C1F)[C@](O)(C[N]2C=NC=N2)C3=CC=C(F)C=C3F
NCGC00164624-03	Adefovir dipivoxil	NA	DNA Polymerase Inhibitors	s-ewing-osteo-TC71-1	activity	4	-1.1	-6.07921	0.6	1.82133	116.526	9.66625	11	350.384	352.744	0.9827	5.5439e-06	107.728	119.639	108.557	109.048	102.682	73.8071	64.8482	47.1347	29.5661	24.6202	9.66625	0.000780415	0.00234124	0.00702378	0.0210713	0.0632139	0.189642	0.568925	1.70678	5.12033	15.361	46.0829	Adefovir dipivoxil	NA	DNA Polymerase Inhibitors	CC(C)(C)C(=O)OCO[P](=O)(COCC[N]1C=NC2=C1N=CN=C2N)OCOC(=O)C(C)(C)C
NCGC00164629-03	Alibendol	NA	treatments of indigestin	s-ewing-osteo-TC71-1	activity	2.3	-2.4	-4.77921	3.98997	103.271	124.404	102.96	11	587.929	589.236	0.831845	0.0186064	121.404	123.991	125.473	128.954	120.875	125.487	120.615	123.853	129.767	116.137	102.96	0.000780415	0.00234124	0.00702378	0.0210713	0.0632139	0.189642	0.568925	1.70678	5.12033	15.361	46.0829	Alibendol	NA	treatments of indigestin	nausea	COC1=C(O)C(=CC(=C1)CC=C)C(=O)NCCO
NCGC00164631-03	Sunitinib malate	FLT1	VEGFR-1/2/3 Inhibitor	s-ewing-osteo-TC71-1	activity	4	-2.1	-4.86797	0.7	-17.7782	127.173	4.54681	11	489.191	492.462	0.964153	8.97678e-05	123.297	123.333	124.168	126.736	133.76	115.434	109.332	78.7621	55.7522	50.9855	4.54681	0.00156083	0.00468253	0.0140476	0.0421426	0.126428	0.379284	1.13785	3.41355	10.2407	30.722	92.1659	Sunitinib malate	FLT1	VEGFR-1/2/3 Inhibitor	CCN(CC)CCNC(=O)C1=C(C)[NH]C(=C1C)/C=C/2C(=O)NC3=CC=C(F)C=C23
NCGC00164634-01	Balsalazide	NA	agents for IBS and constipation	s-ewing-osteo-TC71-1	activity	4	-1.1	-5.02921	4.95492	19.9311	115.075	21.2447	11	483.044	482.936	0.987728	1.4549e-06	115.075	109.838	118.691	117.974	121.985	108.86	112.28	112.606	114.408	25.8059	21.2447	0.000780415	0.00234124	0.00702378	0.0210713	0.0632139	0.189642	0.568925	1.70678	5.12033	15.361	46.0829	Balsalazide	NA	agents for IBS and constipation	OC(=O)c1cc(ccc1O)/N=N/c2ccc(cc2)C(=O)NCCC(=O)O
NCGC00164637-04	Nifekalant	NA	K(ATP) Channel Blockers	s-ewing-osteo-TC71-1	activity	2.1	-2.2	-4.72921	3.06545	81.7912	123.648	80.1355	11	576.054	574.791	0.938519	0.000653252	121.528	126.522	116.704	120.514	127.732	124.302	124.448	126.945	122.728	108.028	80.1355	0.000780415	0.00234124	0.00702378	0.0210713	0.0632139	0.189642	0.568925	1.70678	5.12033	15.361	46.0829	Nifekalant	NA	K(ATP) Channel Blockers	CN1C(=O)/C=C(/NCCN(CCO)CCCC2=CC=C(C=C2)[N+]([O-])=O)N(C)C1=O
NCGC00164789-05	Fulvestrant	ESR1	Estrogen Receptor Antagonist	s-ewing-osteo-TC71-1	activity	1.1	-2.2	-4.82921	0.9	95.3725	147.653	108.328	11	674.433	674.01	0.980628	8.6065e-06	148.813	147.711	146.259	147.414	146.341	149.937	145.422	136.999	134.163	121.8	108.328	0.000780415	0.00234124	0.00702378	0.0210713	0.0632139	0.189642	0.568925	1.70678	5.12033	15.361	46.0829	Fulvestrant	ESR1	Estrogen Receptor Antagonist	C[C@]12CC[C@H]3[C@@H]([C@H](CCCCCCCCC[S+]([O-])CCCC(F)(F)C(F)(F)F)CC4=CC(=CC=C34)O)[C@@H]1CC[C@@H]2O
NCGC00165721-02	A 83-01	NA	TGF-bR1 (ALK5) inhibitor	s-ewing-osteo-TC71-1	activity	1.3	-2.4	-4.92921	0.4	83.4601	144.009	99.3417	11	626.07	623.403	0.737151	0.0641296	148.972	136.63	138.82	138.535	132.575	132.608	133.594	133.075	104.516	124.706	99.3417	0.000780415	0.00234124	0.00702378	0.0210713	0.0632139	0.189642	0.568925	1.70678	5.12033	15.361	46.0829	A 83-01	NA	TGF-bR1 (ALK5) inhibitor	CC1=CC=CC(=N1)C2=N[N](C=C2C3=CC=NC4=C3C=CC=C4)C(=S)NC5=CC=CC=C5
NCGC00165722-02	Plerixafor hydrochloride	CXCR4	Chemokine CXCR4 (SDF-1 Receptor) Antagonists	s-ewing-osteo-TC71-1	activity	1.3	4	-8.02921	0.3	126.511	101.011	113.68	11	568.909	569.136	0.660518	0.144313	105.011	115.031	114.038	119.101	113.062	117.475	116.433	128.282	124.639	122.145	113.68	0.000780415	0.00234124	0.00702378	0.0210713	0.0632139	0.189642	0.568925	1.70678	5.12033	15.361	46.0829	Plerixafor hydrochloride	CXCR4	Chemokine CXCR4 (SDF-1 Receptor) Antagonists	C1CNCCNCCCN(CCNC1)CC2=CC=C(CN3CCCNCCNCCCNCC3)C=C2
NCGC00165727-02	AKT inhibitor VIII	AKT1	AKT 1/2 Inhibitor	s-ewing-osteo-TC71-1	activity	2.1	-2.1	-4.67921	4.09497	26.501	129.853	33.9934	11	585.923	587.203	0.960269	0.000131915	127.649	122.323	127.081	130.606	144.186	133.934	127.319	133.219	125.177	103.529	33.9934	0.000780415	0.00234124	0.00702378	0.0210713	0.0632139	0.189642	0.568925	1.70678	5.12033	15.361	46.0829	AKT inhibitor VIII	AKT1	AKT 1/2 Inhibitor	O=C1NC2=CC=CC=C2N1C3CCN(CC3)CC4=CC=C(C=C4)C5=C(N=C6C=C7[NH]C=NC7=CC6=N5)C8=CC=CC=C8
NCGC00165736-02	Acadesine	PRKAA1	AMP-Activated Protein Kinase (AMPK) Activator	s-ewing-osteo-TC71-1	activity	2.3	4	-5.22921	0.9	119.64	137.501	131.699	11	643.09	642.903	0.723471	0.0941811	139.501	137.375	135.634	137.647	140.453	130.922	134.593	136.336	128.574	124.617	131.699	0.000780415	0.00234124	0.00702378	0.0210713	0.0632139	0.189642	0.568925	1.70678	5.12033	15.361	46.0829	Acadesine	PRKAA1	AMP-Activated Protein Kinase (AMPK) Activator	NC(=O)C1=C(N)[N](C=N1)[C@@H]2O[C@H](CO)[C@@H](O)[C@H]2O
NCGC00165740-04	Benazepril	ACE	Angiotensin-I Converting Enzyme Inhibitor	s-ewing-osteo-TC71-1	activity	4	-2.1	-4.67921	1.96734	3.54524	133.325	6.29191	11	585.53	583.119	0.92059	0.00161069	143.625	122.337	125.572	131.233	137.176	139.461	132.809	137.917	115.087	105.142	6.29191	0.000780415	0.00234124	0.00702378	0.0210713	0.0632139	0.189642	0.568925	1.70678	5.12033	15.361	46.0829	Benazepril	ACE	Angiotensin-I Converting Enzyme Inhibitor	CCOC(=O)[C@H](CCC1=CC=CC=C1)N[C@H]2CCC3=C(C=CC=C3)N(CC(O)=O)C2=O
NCGC00165761-02	BMS-345541	IKBKB	IKK beta inhibitor	s-ewing-osteo-TC71-1	activity	4	-1.1	-5.37921	1.28756	-6.63611	133.004	0.579643	11	486.55	486.422	0.989911	6.749e-07	129.432	130.056	130.407	132.923	131.522	143.444	116.462	100.092	57.5254	12.0129	0.579643	0.000780415	0.00234124	0.00702378	0.0210713	0.0632139	0.189642	0.568925	1.70678	5.12033	15.361	46.0829	BMS-345541	IKBKB	IKK beta inhibitor	CC1=CC=C2N=C(NCCN)C3=NC=C(C)[N]3C2=C1
NCGC00165768-02	339253	CHEK2	Checkpoint Kinase 2 (Chk2) Inhibitors	s-ewing-osteo-TC71-1	activity	1.1	-2.1	-6.27921	0.3	42.818	136.49	48.8762	11	457.869	460.439	0.908595	0.00261441	124.605	131.176	121.913	103.356	97.5917	90.1688	91.6897	84.9729	81.8972	71.9012	48.8762	0.000780415	0.00234124	0.00702378	0.0210713	0.0632139	0.189642	0.568925	1.70678	5.12033	15.361	46.0829	339253	CHEK2	Checkpoint Kinase 2 (Chk2) Inhibitors	NC(=O)C1=CC2=C([NH]C(=N2)C3=CC=C(OC4=CC=C(Cl)C=C4)C=C3)C=C1
NCGC00165770-03	Cardiogenol	NA	cardiomyocytes differentiation initiator	s-ewing-osteo-TC71-1	activity	1.3	4	-8.02921	1.82648	116.3	110.3	110.134	11	552.521	551.525	0.399233	0.378943	108.8	113.422	110.885	116.131	120.749	112.442	119.301	116.129	116.295	111.917	110.134	0.000780415	0.00234124	0.00702378	0.0210713	0.0632139	0.189642	0.568925	1.70678	5.12033	15.361	46.0829	Cardiogenol	NA	cardiomyocytes differentiation initiator	COC1=CC=C(NC2=NC(=CC=N2)NCCO)C=C1
NCGC00165772-02	C-75	FAS	Fatty acid synthase inhibitor	s-ewing-osteo-TC71-1	activity	2.1	-2.2	-4.57921	4.09497	35.3256	122.557	43.4741	11	563.222	564.068	0.972302	3.38786e-05	114.057	119.237	123.739	122.965	128.794	127.511	121.415	124.134	120.193	112.251	43.4741	0.000780415	0.00234124	0.00702378	0.0210713	0.0632139	0.189642	0.568925	1.70678	5.12033	15.361	46.0829	C-75	FAS	Fatty acid synthase inhibitor	CCCCCCCCC1OC(=O)C(=C)C1C(O)=O
NCGC00165782-02	GW 4869	NSMAF	Neutral Sphingomyelinase (N-SMase) Inhibitor	s-ewing-osteo-TC71-1	activity	1.3	2.2	-6.82921	0.2	146.82	108.82	139.469	11	616.766	618.183	0.78575	0.0373558	112.82	126.436	124.896	122.972	124.852	131.759	126.366	130.069	134.906	136.893	139.469	0.000780415	0.00234124	0.00702378	0.0210713	0.0632139	0.189642	0.568925	1.70678	5.12033	15.361	46.0829	GW 4869	NSMAF	Neutral Sphingomyelinase (N-SMase) Inhibitor	O=C(NC1=CC=C(C=C1)/C2=N/CCN2)\C=C\C3=CC=C(\C=C\C(=O)NC4=CC=C(C=C4)C/5=N/CCN5)C=C3
NCGC00165783-02	Vadimezan	NA	Interferon Inducer	s-ewing-osteo-TC71-1	activity	4	-2.1	-4.72921	2.72022	27.9117	137.953	23.3012	11	614.246	611.815	0.972702	3.2042e-05	138.565	134.602	131.906	138.705	139.276	145.74	139.931	133.025	134.432	102.024	23.3012	0.000780415	0.00234124	0.00702378	0.0210713	0.0632139	0.189642	0.568925	1.70678	5.12033	15.361	46.0829	Vadimezan	NA	Interferon Inducer	CC1=C(C)C2=C(C=C1)C(=O)C3=C(O2)C(=CC=C3)CC(O)=O
NCGC00165799-02	GW-6471	PPARA	PPARalpha Antagonist	s-ewing-osteo-TC71-1	activity	2.1	-2.3	-5.27921	3.132	39.4286	121.54	40.5949	11	503.929	512.369	0.952853	0.550074	117.798	116.98	113.684	135.756	121.273	121.728	119.139	123.678	79.4185	118.29	40.5949	0.000780415	0.00234124	0.00702378	0.0210713	0.0632139	0.189642	0.568925	1.70678	5.12033	15.361	46.0829	GW-6471	PPARA	PPARalpha Antagonist	CCC(=O)NC[C@H](CC1=CC=C(OCCC2=C(C)OC(=N2)C3=CC=CC=C3)C=C1)N\C(C)=C/C(=O)C4=CC=C(C=C4)C(F)(F)F
NCGC00165811-03	IMD-0354	IKBKB	IKK-2 Inhibitor	s-ewing-osteo-TC71-1	activity	4	-1.1	-5.97921	2.12107	1.10547	141.03	1.373	11	443.024	443.633	0.995475	2.84e-08	135.139	139.926	134.331	148.659	146.557	137.82	109.484	36.7594	3.97165	3.94635	1.373	0.000780415	0.00234124	0.00702378	0.0210713	0.0632139	0.189642	0.568925	1.70678	5.12033	15.361	46.0829	IMD-0354	IKBKB	IKK-2 Inhibitor	OC1=C(C=C(Cl)C=C1)C(=O)NC2=CC(=CC(=C2)C(F)(F)F)C(F)(F)F
NCGC00165815-05	NSC-724771	NA	nitric oxide donors	s-ewing-osteo-TC71-1	activity	4	-2.1	-4.97921	1.37226	-7.4843	114.477	3.59206	11	462.543	466.085	0.950639	0.000294158	104.286	102.223	109.733	113.769	120.496	123.483	121.057	115.627	72.0496	44.2262	3.59206	0.000780415	0.00234124	0.00702378	0.0210713	0.0632139	0.189642	0.568925	1.70678	5.12033	15.361	46.0829	NSC-724771	NA	nitric oxide donors	CCOC(=O)N1CCN(CC1)[N+](/[O-])=N/OC2=C(C=C(C=C2)[N+]([O-])=O)[N+]([O-])=O
NCGC00165816-02	KI-16425	LPAR1	Lysophospholipid edg2 (LPA1)/edg7 (LPA3) Receptor Antagonists	s-ewing-osteo-TC71-1	activity	1.3	4	-7.72921	0.4	133.802	109.802	124.147	11	604.636	606.275	0.783617	0.0531164	113.802	115.223	123.507	121.529	123.928	131.201	127.179	125.817	128.934	137.509	124.147	0.000780415	0.00234124	0.00702378	0.0210713	0.0632139	0.189642	0.568925	1.70678	5.12033	15.361	46.0829	KI-16425	LPAR1	Lysophospholipid edg2 (LPA1)/edg7 (LPA3) Receptor Antagonists	CC(OC(=O)NC1=C(ON=C1C)C2=CC=C(CSCCC(O)=O)C=C2)C3=C(Cl)C=CC=C3
NCGC00165833-04	Entinostat	HDAC1	HDAC1 Inhibitor	s-ewing-osteo-TC71-1	activity	4	-1.1	-5.62921	1	3.25199	140.298	6.70677	11	489.369	490.878	0.986773	1.9494e-06	139.583	139.704	131.101	149.758	134.503	132.945	118.126	74.0591	47.1252	27.8676	6.70677	0.000780415	0.00234124	0.00702378	0.0210713	0.0632139	0.189642	0.568925	1.70678	5.12033	15.361	46.0829	Entinostat	HDAC1	HDAC1 Inhibitor	NC1=C(NC(=O)C2=CC=C(CNC(=O)OCC3=CC=CN=C3)C=C2)C=CC=C1
NCGC00165844-02	NU-6027	CDK1	CDK1/2 Inhibitor	s-ewing-osteo-TC71-1	activity	2.1	-2.1	-4.77921	1.55795	30.2143	129.688	42.6111	11	570.3	570.94	0.96885	5.28958e-05	131.159	124.502	129.31	129.986	136.244	137.325	127.242	120.394	112.709	88.8737	42.6111	0.000780415	0.00234124	0.00702378	0.0210713	0.0632139	0.189642	0.568925	1.70678	5.12033	15.361	46.0829	NU-6027	CDK1	CDK1/2 Inhibitor	NC1=NC(=C(N=O)C(=N1)OCC2CCCCC2)N
NCGC00165863-02	PD-173074	NA	FGFR 1/3 inhibitor	s-ewing-osteo-TC71-1	activity	4	-2.1	-4.77921	1.86169	-2.16424	130.247	7.19882	11	557.855	558.578	0.974284	2.55135e-05	124.237	124.55	134.581	131.05	132.236	140.745	133.601	127.693	106.733	73.2842	7.19882	0.000780415	0.00234124	0.00702378	0.0210713	0.0632139	0.189642	0.568925	1.70678	5.12033	15.361	46.0829	PD-173074	NA	FGFR 1/3 inhibitor	CCN(CC)CCCCNC1=NC=C2C=C(C(=NC2=N1)NC(=O)NC(C)(C)C)C3=CC(=CC(=C3)OC)OC
NCGC00165869-03	Dorsomorphin	NA	TGF-bR1 (ALK5) inhibitor	s-ewing-osteo-TC71-1	activity	4	-2.1	-4.82921	1.53859	-15.6179	125.25	1.51851	11	520.792	520.064	0.977001	1.66358e-05	123.921	127.183	134.347	121.055	125.168	132.542	117.568	108.943	102.803	57.5619	1.51851	0.000780415	0.00234124	0.00702378	0.0210713	0.0632139	0.189642	0.568925	1.70678	5.12033	15.361	46.0829	Dorsomorphin	NA	TGF-bR1 (ALK5) inhibitor	C1CCN(CC1)CCOC2=CC=C(C=C2)C3=C[N]4N=CC(=C4N=C3)C5=CC=NC=C5
NCGC00165873-02	PS-1145	IKBKB	IKK-2 (IKK-beta) Inhibitor	s-ewing-osteo-TC71-1	activity	4	-2.1	-4.62921	4.09497	10.6159	138.49	20.9022	11	623.48	623.962	0.902813	0.00321712	140.51	145.431	155.518	148.831	150.215	121.72	138.494	133.361	117.211	114.725	20.9022	0.000780415	0.00234124	0.00702378	0.0210713	0.0632139	0.189642	0.568925	1.70678	5.12033	15.361	46.0829	PS-1145	IKBKB	IKK-2 (IKK-beta) Inhibitor	ClC1=CC2=C([NH]C3=C2C=CN=C3)C(=C1)NC(=O)C4=CC=CN=C4
NCGC00165875-03	PB-28	SIGMAR1	sigma1/2 Receptor Agonist	s-ewing-osteo-TC71-1	activity	2.1	-2.2	-4.77921	1.55795	49.6011	131.1	59.98	11	586.676	585.969	0.960161	0.000133294	134.115	128.963	131.476	130.072	127.019	128.719	135.129	133.503	111.861	99.8902	59.98	0.000780415	0.00234124	0.00702378	0.0210713	0.0632139	0.189642	0.568925	1.70678	5.12033	15.361	46.0829	PB-28	SIGMAR1	sigma1/2 Receptor Agonist	COC1=C2CCCC(CCCN3CCN(CC3)C4CCCCC4)C2=CC=C1
NCGC00165880-04	Reversine	ADORA3	Adenosine A3 Antagonists	s-ewing-osteo-TC71-1	activity	4	-1.1	-5.57921	1.1	13.4335	133.215	8.84047	11	485.184	488.814	0.965353	7.89921e-05	123.666	136.153	129.823	130.591	132.736	134.555	125.501	72.4265	57.0559	38.7567	8.84047	0.000780415	0.00234124	0.00702378	0.0210713	0.0632139	0.189642	0.568925	1.70678	5.12033	15.361	46.0829	Reversine	ADORA3	Adenosine A3 Antagonists	C1CCC(CC1)NC2=C3N=C[NH]C3=NC(=N2)NC4=CC=C(C=C4)N5CCOCC5
NCGC00165889-02	SB-505124	NA	TGF-bR1 (ALK4/5) Inhibitor	s-ewing-osteo-TC71-1	activity	1.1	-2.2	-4.97921	1.96734	39.3075	123.232	43.393	11	534.234	533.838	0.937626	0.000686892	124.491	130.986	130.749	128.555	126.806	113.646	107.93	116.747	110.593	65.6945	43.393	0.000780415	0.00234124	0.00702378	0.0210713	0.0632139	0.189642	0.568925	1.70678	5.12033	15.361	46.0829	SB-505124	NA	TGF-bR1 (ALK4/5) Inhibitor	CC1=NC(=CC=C1)C2=C(N=C([NH]2)C(C)(C)C)C3=CC4=C(OCO4)C=C3
NCGC00165898-02	SD-208	NA	TGF-bR1 (ALK5) Inhibitor	s-ewing-osteo-TC71-1	activity	1.3	-2.4	-5.12921	0.5	104.955	137.897	109.779	11	626.37	627.683	0.774697	0.042795	133.897	140.203	139.798	134.433	131.324	139.607	127.633	127.943	118.261	126.368	109.779	0.000780415	0.00234124	0.00702378	0.0210713	0.0632139	0.189642	0.568925	1.70678	5.12033	15.361	46.0829	SD-208	NA	TGF-bR1 (ALK5) Inhibitor	FC1=C(C=C(Cl)C=C1)C2=NC3=NC=CN=C3C(=N2)NC4=CC=NC=C4
NCGC00165902-02	SU-MI-2	MET	HGFR (MET; c-Met) Inhibitor	s-ewing-osteo-TC71-1	activity	4	-2.1	-4.57921	4.09497	3.2012	133.072	15.121	11	601.119	600.405	0.987749	1.4448e-06	136.752	128.232	128.165	136.432	137.795	137.285	135.31	127.691	129.928	120.491	15.121	0.000780415	0.00234124	0.00702378	0.0210713	0.0632139	0.189642	0.568925	1.70678	5.12033	15.361	46.0829	SU-MI-2	MET	HGFR (MET; c-Met) Inhibitor	CN1CCN(CC1)C(=O)C2=C(C)[NH]C(=C2C)\C=C3/C(=O)NC4=CC=C(C=C34)[S+]([O-])(=O)N(C)C5=CC(=CC=C5)Cl
NCGC00165909-03	TRAM-34	NA	Intermediate Conductance Channel Blockers	s-ewing-osteo-TC71-1	activity	4	-1.1	-5.97921	4.95492	25.0659	131.296	21.4084	11	451.781	453.391	0.990033	6.434e-07	128.982	133.982	119.665	130.054	137.11	130.677	134.085	32.482	26.739	28.686	21.4084	0.000780415	0.00234124	0.00702378	0.0210713	0.0632139	0.189642	0.568925	1.70678	5.12033	15.361	46.0829	TRAM-34	NA	Intermediate Conductance Channel Blockers	ClC1=CC=CC=C1C([N]2C=CC=N2)(C3=CC=CC=C3)C4=CC=CC=C4
NCGC00165915-03	KDS-4103	FAAH	Fatty Acid Amide Hydrolase (FAAH) Inhibitor	s-ewing-osteo-TC71-1	activity	1.3	4	-7.97921	1.17051	132.505	118.281	109.195	11	620.577	618.136	0.602421	0.195042	122.005	115.151	126.411	129.478	127.732	129.816	135.398	136.345	137.916	124.697	109.195	0.000780415	0.00234124	0.00702378	0.0210713	0.0632139	0.189642	0.568925	1.70678	5.12033	15.361	46.0829	KDS-4103	FAAH	Fatty Acid Amide Hydrolase (FAAH) Inhibitor	NC(=O)C1=CC(=CC=C1)C2=CC=CC(=C2)OC(=O)NC3CCCCC3
NCGC00165966-02	Vinorelbine tartrate	TUBB	Tubulin polymerization inhibitor	s-ewing-osteo-TC71-1	activity	4	-1.1	-6.77921	1	28.5004	142.632	26.051	11	402.816	403.694	0.993156	1.462e-07	137.386	142.627	142.113	127.082	114.995	75.611	60.1898	37.9624	28.8966	32.9739	26.051	0.000780415	0.00234124	0.00702378	0.0210713	0.0632139	0.189642	0.568925	1.70678	5.12033	15.361	46.0829	Vinorelbine tartrate	TUBB	Tubulin polymerization inhibitor	O=C(O)C(O)C(O)C(=O)O.O=C(O)C(O)C(O)C(=O)O.O=C(OC)[C@@]2(C[C@@H]4C=C(CC)C[N@](Cc1c3ccccc3nc12)C4)c5cc9c(cc5OC)N(C)[C@@H]6[C@]98CCN7CC=C[C@@](CC)([C@@H](OC(C)=O)[C@]6(O)C(=O)OC)[C@H]78
NCGC00166035-02	Demecolcine	TUBB	Tubulin polymerization inhibitor	s-ewing-osteo-TC71-1	activity	4	-1.1	-8.47921	2.24812	32.305	152.625	27.4189	11	232.258	231.514	0.99661	9e-09	149.571	113.001	52.0653	31.5104	34.1514	34.5079	32.0345	35.111	31.3675	30.9496	27.4189	0.000780415	0.00234124	0.00702378	0.0210713	0.0632139	0.189642	0.568925	1.70678	5.12033	15.361	46.0829	Demecolcine	TUBB	Tubulin polymerization inhibitor	CN[C@H]1CCC2=CC(=C(OC)C(=C2C/3=C/C=C(OC)\C(=O)/C=C13)OC)OC
NCGC00166076-06	Arbutin	NA	Free Radical Scavenger	s-ewing-osteo-TC71-1	activity	2.1	-2.1	-4.72921	2.72022	36.6281	117.913	37.8499	11	530.684	531.797	0.939343	0.000621528	110.913	106.205	114.239	117.854	121.18	127.122	124.949	122.337	114.537	88.9777	37.8499	0.000780415	0.00234124	0.00702378	0.0210713	0.0632139	0.189642	0.568925	1.70678	5.12033	15.361	46.0829	Arbutin	NA	Free Radical Scavenger	OC[C@H]1O[C@@H](OC2=CC=C(O)C=C2)[C@H](O)[C@@H](O)[C@@H]1O
NCGC00166088-05	Decitabine	DNMT1	DNA Methyltransferase (DNMT) Inhibitor	s-ewing-osteo-TC71-1	activity	1.1	-2.2	-5.62921	0.5	58.1318	117.939	65.6104	11	478.038	478.08	0.951188	0.000282605	119.029	121.513	107.864	112.468	109.353	101.835	101.512	88.4845	80.9286	80.8591	65.6104	0.000780415	0.00234124	0.00702378	0.0210713	0.0632139	0.189642	0.568925	1.70678	5.12033	15.361	46.0829	Decitabine	DNMT1	DNA Methyltransferase (DNMT) Inhibitor	NC\1=N\C(=O)N(\C=N1)[C@H]2C[C@H](O)[C@@H](CO)O2
NCGC00166111-04	Estriol	ESR1	Estrogen Receptor (ER) Agonist	s-ewing-osteo-TC71-1	activity	2.1	-3	-4.57921	4.09497	64.3197	140.846	71.5302	11	654.306	654.841	0.941196	0.000556003	137.813	143.055	137.901	148.893	150.86	141.31	136.825	133.621	137.068	132.966	71.5302	0.000780415	0.00234124	0.00702378	0.0210713	0.0632139	0.189642	0.568925	1.70678	5.12033	15.361	46.0829	Estriol	ESR1	Estrogen Receptor (ER) Agonist	C[C@]12CC[C@H]3[C@@H](CCC4=CC(=CC=C34)O)[C@@H]1C[C@@H](O)[C@@H]2O
NCGC00166125-01	Meglumine	NA	amino sugar	s-ewing-osteo-TC71-1	activity	1.3	4	-6.67921	1.4641	125.226	113.226	121.993	11	572.774	574.138	0.817629	0.023705	111.726	113.884	111.83	118.368	113.71	116.98	126.925	124.727	123.569	127.426	121.993	0.000780415	0.00234124	0.00702378	0.0210713	0.0632139	0.189642	0.568925	1.70678	5.12033	15.361	46.0829	Meglumine	NA	amino sugar	O[C@H]([C@@H](O)CNC)[C@H](O)[C@H](O)CO
NCGC00166281-02	Quinine	NA	antimalarial agents; Cytochrome P450 CYP2D6 Inhibitors	s-ewing-osteo-TC71-1	activity	1.3	4	-4.82921	0.8	99.4589	120.914	103.785	11	565.98	570.337	0.41107	0.339617	105.414	126.383	120.817	125.467	125.694	119.7	125.708	112.94	112.192	114.162	103.785	0.000780415	0.00234124	0.00702378	0.0210713	0.0632139	0.189642	0.568925	1.70678	5.12033	15.361	46.0829	Quinine	NA	antimalarial agents; Cytochrome P450 CYP2D6 Inhibitors	COC1=CC2=C(C=C1)N=CC=C2[C@@H](O)[C@@H]3CC4CCN3C[C@@H]4C=C
NCGC00166294-02	Sparfloxacin	TOP2B	DNA Topoisomerase IV Inhibitors	s-ewing-osteo-TC71-1	activity	5	4	NA	NA	NA	NA	127.164	11	NA	666.064	NA	NA	135.693	137.824	125.379	129.276	140.048	130.38	122.215	117.058	129.198	143.531	127.164	0.00039023	0.00117065	0.00351189	0.0105357	0.031607	0.0948209	0.284463	0.853388	2.56016	7.68049	23.0415	Sparfloxacin	TOP2B	DNA Topoisomerase IV Inhibitors	C[C@H]1CN(C[C@@H](C)N1)C2=C(F)C3=C(C(=C2F)N)C(=O)\C(=C/N3C4CC4)C(O)=O
NCGC00166310-03	Marbofloxacin	NA	Antibiotic	s-ewing-osteo-TC71-1	activity	1.3	4	-8.32921	0.5	121.91	135.546	127.891	11	600.591	599.603	0.677781	0.130895	133.546	125.844	130.152	127.85	122.779	123.61	122.725	126.114	122.452	119.683	127.891	0.000780415	0.00234124	0.00702378	0.0210713	0.0632139	0.189642	0.568925	1.70678	5.12033	15.361	46.0829	Marbofloxacin	NA	Antibiotic	CN1CCN(CC1)C2=C3OCN(C)N4\C=C(C(O)=O)/C(=O)C(=C34)C=C2F
NCGC00166323-03	Trifluridine	TYMS	thymidylate synthase inhibitor	s-ewing-osteo-TC71-1	activity	4	-1.1	-5.72921	1.78849	21.0822	138.909	16.9578	11	499.311	500.818	0.992767	1.819e-07	138.264	146.122	136.757	139.018	132.841	140.828	124.527	84.5761	35.2048	30.9232	16.9578	0.000780415	0.00234124	0.00702378	0.0210713	0.0632139	0.189642	0.568925	1.70678	5.12033	15.361	46.0829	Trifluridine	TYMS	thymidylate synthase inhibitor	OC[C@H]1O[C@H](C[C@@H]1O)N2/C=C(C(=O)NC2=O)/C(F)(F)F
NCGC00166413-03	Argatroban	NA	Thrombin Inhibitors	s-ewing-osteo-TC71-1	activity	1.1	-2.2	-4.87921	3.92947	46.825	119.221	46.5925	11	530.283	532.783	0.956415	0.00018607	112.221	114.925	116.409	115.138	118.458	118.874	126.774	130.174	119.125	73.9161	46.5925	0.000780415	0.00234124	0.00702378	0.0210713	0.0632139	0.189642	0.568925	1.70678	5.12033	15.361	46.0829	Argatroban	NA	Thrombin Inhibitors	C[C@@H]1CCN([C@H](C1)C(O)=O)C(=O)[C@H](CCCNC(N)=N)N[S+]([O-])(=O)C2=CC=CC3=C2NCC(C)C3
NCGC00167328-02	Aloxistatin	CAPN1	Calpain Inhibitor	s-ewing-osteo-TC71-1	activity	1.3	-1.2	-5.52921	4.95492	121.189	146.359	114.551	11	672.581	673.949	0.805033	0.0285628	143.859	142.186	150.87	146.049	151.489	137.886	145.997	150.731	119.245	130.366	114.551	0.000780415	0.00234124	0.00702378	0.0210713	0.0632139	0.189642	0.568925	1.70678	5.12033	15.361	46.0829	Aloxistatin	CAPN1	Calpain Inhibitor	CCOC(=O)[C@H]1O[C@@H]1C(=O)N[C@@H](CC(C)C)C(=O)NCCC(C)C
NCGC00167403-03	Pluripotin	RASAL1	Dual RASGAP/Erk inhibitor	s-ewing-osteo-TC71-1	activity	4	-1.1	-6.42921	3.98997	35.1465	112.305	16.361	11	374.85	381.088	0.933486	0.000863714	104.144	113.203	118.379	115.105	112.025	106.594	47.0089	31.0436	34.5251	59.3734	16.361	0.000780415	0.00234124	0.00702378	0.0210713	0.0632139	0.189642	0.568925	1.70678	5.12033	15.361	46.0829	Pluripotin	RASAL1	Dual RASGAP/Erk inhibitor	C[N]1N=C(C)C=C1NC2=NC=C3CN(C(=O)N(C)C3=N2)C4=C(C)C=CC(=C4)NC(=O)C5=CC=CC(=C5)C(F)(F)F
NCGC00167429-05	Temozolomide	TOP2A	DNA Topoisomerase II Inhibitors	s-ewing-osteo-TC71-1	activity	5	4	NA	NA	NA	NA	121.898	11	NA	608.61	NA	NA	126.42	138.881	128.826	117.602	124.567	134.583	127.752	124.793	123.499	121.872	121.898	0.000780415	0.00234124	0.00702378	0.0210713	0.0632139	0.189642	0.568925	1.70678	5.12033	15.361	46.0829	Temozolomide	TOP2A	DNA Topoisomerase II Inhibitors	CN1\N=N/C2=C(N=C[N]2C1=O)C(N)=O
NCGC00167430-03	Tioconazole	NA	Antifungal Agent	s-ewing-osteo-TC71-1	activity	2.3	-3	-4.57921	4.09497	40.4406	113.046	47.2208	11	521.841	525.162	0.846412	0.014078	100.204	109.992	114.115	122.135	120.951	113.504	115.409	124.056	96.8373	106.471	47.2208	0.000780415	0.00234124	0.00702378	0.0210713	0.0632139	0.189642	0.568925	1.70678	5.12033	15.361	46.0829	Tioconazole	NA	Antifungal Agent	ClC1=CC=C(C(C[N]2C=CN=C2)OCC3=C(Cl)SC=C3)C(=C1)Cl
NCGC00167431-02	Rifapentine	PRKDC	DNA-Directed RNA Polymerase Inhibitor	s-ewing-osteo-TC71-1	activity	4	-1.2	-6.87921	0.8	-0.955191	71.7363	-0.198646	11	157.722	157.046	0.957376	0.000171294	73.0624	70.5626	58.7885	56.6246	57.1198	18.3601	23.6921	4.66371	2.60722	0.318147	-0.198646	0.000780415	0.00234124	0.00702378	0.0210713	0.0632139	0.189642	0.568925	1.70678	5.12033	15.361	46.0829	Rifapentine	PRKDC	DNA-Directed RNA Polymerase Inhibitor	CO[C@H]1/C=C/O[C@@]2(C)OC3=C(C2=O)C4=C(C(=C3C)O)C(=C(NC(=O)\C(=C/C=C/[C@H](C)[C@H](O)[C@@H](C)[C@@H](O)[C@@H](C)[C@H](OC(C)=O)[C@@H]1C)C)C(=C4O)\C=N/N5CCN(CC5)C6CCCC6)O
NCGC00167433-02	Rocuronium bromide	NA	Steroid non-depolarizing neuromuscular blocker	s-ewing-osteo-TC71-1	activity	2.3	-2.4	-4.77921	2.04374	105.197	130.833	107.969	11	615.859	616.534	0.762834	0.0491668	124.333	124.696	133.048	131.298	128.267	137.187	136.606	129.39	128.828	118.708	107.969	0.000780415	0.00234124	0.00702378	0.0210713	0.0632139	0.189642	0.568925	1.70678	5.12033	15.361	46.0829	Rocuronium bromide	NA	Steroid non-depolarizing neuromuscular blocker	CC(=O)O[C@H]1[C@H](C[C@H]2[C@@H]3CC[C@H]4C[C@H](O)[C@H](C[C@]4(C)[C@H]3CC[C@]12C)N5CCOCC5)[N+]6(CCCC6)CC=C
NCGC00167438-02	Trospium chloride	NA	Muscarinic Antagonists	s-ewing-osteo-TC71-1	activity	1.3	4	-7.37921	2.18762	122.46	110.44	128.787	11	567.851	565.667	0.465904	0.290405	114.46	111.311	105.693	113.647	118.967	119.942	122.567	133.104	117.435	111.729	128.787	0.000780415	0.00234124	0.00702378	0.0210713	0.0632139	0.189642	0.568925	1.70678	5.12033	15.361	46.0829	Trospium chloride	NA	Muscarinic Antagonists	[Cl-].OC(c1ccccc1)(c2ccccc2)C(=O)O[C@@H]3C[C@@H]5CC[C@H](C3)[N+]45CCCC4
NCGC00167441-03	Pramipexole hydrochloride	DRD3	Dopamine D3 Antagonist	s-ewing-osteo-TC71-1	activity	5	4	NA	NA	NA	NA	117.228	11	NA	518.942	NA	NA	104.862	105.366	105.062	106.784	105.105	113.802	114.729	110.568	96.3102	110.176	117.228	0.000780415	0.00234124	0.00702378	0.0210713	0.0632139	0.189642	0.568925	1.70678	5.12033	15.361	46.0829	Pramipexole hydrochloride	DRD3	Dopamine D3 Antagonist	CCCN[C@H]1CCC2=C(C1)SC(=N2)N
NCGC00167453-02	Clinofibrate	NA	treatment of lipoprotein diseases	s-ewing-osteo-TC71-1	activity	1.3	4	-4.97921	0.5	108.57	129.963	113.385	11	603.233	603.726	0.600119	0.169672	127.463	130.758	125.747	135.232	132.065	123.098	124.816	118.761	128.531	117.499	113.385	0.000780415	0.00234124	0.00702378	0.0210713	0.0632139	0.189642	0.568925	1.70678	5.12033	15.361	46.0829	Clinofibrate	NA	treatment of lipoprotein diseases	O=C(O)C(C)(CC)Oc1ccc(cc1)C2(CCCCC2)c3ccc(OC(C)(CC)C(=O)O)cc3
NCGC00167466-03	Lomustine	NA	DNA Alkylating Agent	s-ewing-osteo-TC71-1	activity	1.3	4	-5.97921	4.95492	145.423	135.963	147.061	11	669.493	668.408	0.677577	0.106191	142.423	133.895	133.104	131.623	136.559	140.189	135.259	145.562	142.782	146.282	147.061	0.000780415	0.00234124	0.00702378	0.0210713	0.0632139	0.189642	0.568925	1.70678	5.12033	15.361	46.0829	Lomustine	NA	DNA Alkylating Agent	ClCCN(N=O)C(=O)NC1CCCCC1
NCGC00167467-04	Vecuronium bromide	NA	Steroid non-depolarizing neuromuscular blocker	s-ewing-osteo-TC71-1	activity	4	-1.1	-5.12921	4.09497	2.45718	129.654	4.98896	11	519.611	517.716	0.992883	1.707e-07	131.578	130.72	133.062	119.095	133.252	132.528	130.091	125.664	105.843	6.17229	4.98896	0.000780415	0.00234124	0.00702378	0.0210713	0.0632139	0.189642	0.568925	1.70678	5.12033	15.361	46.0829	Vecuronium bromide	NA	Steroid non-depolarizing neuromuscular blocker	CC(=O)O[C@H]1C[C@@H]2CC[C@@H]3[C@H](CC[C@@]4(C)[C@H]3C[C@@H]([C@@H]4OC(C)=O)[N+]5(C)CCCCC5)[C@@]2(C)C[C@@H]1N6CCCCC6
NCGC00167472-02	Amlexanox	NA	Mediator Release Inhibitors	s-ewing-osteo-TC71-1	activity	2.3	-3	-4.67921	4.95492	81.1138	113.953	81.8936	11	536.112	538.717	0.785529	0.0373621	105.368	110.01	111.141	109.247	114.261	122.744	118.003	116.171	120.231	107.579	81.8936	0.000780415	0.00234124	0.00702378	0.0210713	0.0632139	0.189642	0.568925	1.70678	5.12033	15.361	46.0829	Amlexanox	NA	Mediator Release Inhibitors	CC(C)C1=CC=C2OC3=NC(=C(C=C3C(=O)C2=C1)C(O)=O)N
NCGC00167485-02	Doripenem	NA	Carbapenem Antibiotic	s-ewing-osteo-TC71-1	activity	1.3	4	-5.37921	4.44947	122.173	128.954	123.036	11	612.39	612.839	0.51526	0.642865	129.454	127.545	126.567	131.003	134.869	123.896	130.305	129.037	30.9238	120.887	123.036	0.000780415	0.00234124	0.00702378	0.0210713	0.0632139	0.189642	0.568925	1.70678	5.12033	15.361	46.0829	Doripenem	NA	Carbapenem Antibiotic	C[C@H](O)[C@H]1[C@@H]2[C@H](C)C(=C(\N2C1=O)C(O)=O)/S[C@@H]3CN[C@H](CN[S+](N)([O-])=O)C3
NCGC00167487-01	Bicalutamide	AR	Androgen Receptor Antagonist	s-ewing-osteo-TC71-1	activity	4	-1.1	-5.42921	3.57225	7.5738	120.67	3.88071	11	451.33	454.626	0.989692	7.341e-07	112.501	114.502	119.105	119.809	129.552	124.31	125.528	114.478	36.2149	10.872	3.88071	0.000780415	0.00234124	0.00702378	0.0210713	0.0632139	0.189642	0.568925	1.70678	5.12033	15.361	46.0829	Bicalutamide	AR	Androgen Receptor Antagonist	Fc1ccc(cc1)S(=O)(=O)C[C@](C)(O)C(=O)Nc2cc(c(C#N)cc2)C(F)(F)F
NCGC00167488-03	Sorafenib	FLT1	VEGFR-1/2/3 Inhibitor	s-ewing-osteo-TC71-1	activity	4	-1.1	-5.62921	1.4641	-0.19953	144.792	3.34437	11	502.798	508.687	0.953103	0.000243705	139.648	146.807	150.305	146.043	143.489	132.446	129.373	101.856	9.96823	34.1276	3.34437	0.000780415	0.00234124	0.00702378	0.0210713	0.0632139	0.189642	0.568925	1.70678	5.12033	15.361	46.0829	Sorafenib	FLT1	VEGFR-1/2/3 Inhibitor	CNC(=O)C1=CC(=CC=N1)OC2=CC=C(NC(=O)NC3=CC=C(Cl)C(=C3)C(F)(F)F)C=C2
NCGC00167490-02	Lumefantrine	NA	antimalarial agents	s-ewing-osteo-TC71-1	activity	2.3	-3	-4.57921	4.09497	83.1466	118.467	86.3667	11	558.957	559.892	0.846655	0.0140394	114.967	112.178	117.3	117.477	114.072	119.333	123.426	126.206	121.548	114.86	86.3667	0.000780415	0.00234124	0.00702378	0.0210713	0.0632139	0.189642	0.568925	1.70678	5.12033	15.361	46.0829	Lumefantrine	NA	antimalarial agents	CCCCN(CCCC)CC(O)C1=C2C3=CC=C(Cl)C=C3C(=C/C4=CC=C(Cl)C=C4)/C2=CC(=C1)Cl
NCGC00167491-02	Lenalidomide (CC-5013)	TNF	TNF-alpha Production Inhibitor	s-ewing-osteo-TC71-1	activity	1.3	-1.4	-6.21797	0.6	117.885	145.967	135.139	11	662.8	605.45	0.710938	0.102952	137.467	147.611	150.574	142.389	135.856	126.493	130.927	135.025	115.316	120.663	135.139	0.00156083	0.00468253	0.0140476	0.0421426	0.126428	0.379284	1.13785	3.41355	10.2407	30.722	92.1659	Lenalidomide (CC-5013)	TNF	TNF-alpha Production Inhibitor	NC1=CC=CC2=C1CN([C@H]3CCC(=O)NC3=O)C2=O
NCGC00167493-04	Manidipine dihydrochloride	NA	Calcium Channel Blocker	s-ewing-osteo-TC71-1	activity	1.3	4	-6.77921	4.95492	123.712	133.084	124.496	11	616.267	617.579	0.472542	0.284608	130.084	137.336	128.861	130.756	139.605	126.974	116.024	130.678	118.581	129.035	124.496	0.000780415	0.00234124	0.00702378	0.0210713	0.0632139	0.189642	0.568925	1.70678	5.12033	15.361	46.0829	Manidipine dihydrochloride	NA	Calcium Channel Blocker	Cl.Cl.[O-][N+](=O)c1cccc(c1)C2C(C(=O)OC)=C(C)NC(C)=C2C(=O)OCCN3CCN(CC3)C(c4ccccc4)c5ccccc5
NCGC00167496-02	Methylene blue	NA	antimalarial agents; possible altered redox environment	s-ewing-osteo-TC71-1	activity	4	-1.1	-5.42921	1.37226	-1.64553	113.75	4.13301	11	415.355	415.777	0.989625	7.53e-07	107.321	109.357	110.862	121.011	120.853	112.507	102.859	84.2646	43.6179	10.0611	4.13301	0.000780415	0.00234124	0.00702378	0.0210713	0.0632139	0.189642	0.568925	1.70678	5.12033	15.361	46.0829	Methylene blue	NA	antimalarial agents; possible altered redox environment	glutathione reductase inhibitor	CN(C)C1=CC2=C(C=C1)N=C3C=CC(=CC3=[S+]2)N(C)C
NCGC00167503-02	Aclarubicin	TOP2A	DNA Topoisomerase II Inhibitors	s-ewing-osteo-TC71-1	activity	4	-1.1	-6.72921	1.37226	7.23184	120.125	5.48627	11	303.277	305.068	0.990006	6.503e-07	114.584	117.345	116.931	128.613	96.5348	60.2842	30.5169	14.7488	7.0273	6.94751	5.48627	0.000780415	0.00234124	0.00702378	0.0210713	0.0632139	0.189642	0.568925	1.70678	5.12033	15.361	46.0829	Aclarubicin	TOP2A	DNA Topoisomerase II Inhibitors	CC[C@@]1(O)C[C@H](O[C@H]2C[C@@H]([C@H](O[C@H]3C[C@H](O)[C@H](O[C@H]4CCC(=O)[C@H](C)O4)[C@H](C)O3)[C@H](C)O2)N(C)C)C5=C(O)C6=C(C=C5[C@H]1C(=O)OC)C(=O)C7=CC=CC(=C7C6=O)O
NCGC00167506-03	Pimecrolimus	NA	Macrolide Antibiotic	s-ewing-osteo-TC71-1	activity	1.1	-2.2	-4.92921	2.84727	48.3644	118.804	48.7262	11	526.236	528.136	0.983198	4.952e-06	115.596	116.429	113.128	119.024	119.865	124.569	121.38	120.562	113.717	72.4673	48.7262	0.000780415	0.00234124	0.00702378	0.0210713	0.0632139	0.189642	0.568925	1.70678	5.12033	15.361	46.0829	Pimecrolimus	NA	Macrolide Antibiotic	CC[C@@H]1/C=C(C)/C[C@H](C)C[C@H](OC)[C@H]2O[C@](O)([C@H](C)C[C@@H]2OC)C(=O)C(=O)N3CCCC[C@H]3C(=O)O[C@@H]([C@H](C)[C@@H](O)CC1=O)/C(C)=C/[C@@H]4CC[C@H](Cl)[C@@H](C4)OC
NCGC00167507-03	Lapatinib	EGFR	EGFR (HER1; erbB1) inhibitor	s-ewing-osteo-TC71-1	activity	4	-1.1	-5.7	1.4	-2	135.743	2.8258	11	477.107	479.646	0.974558	0.000304741	135.846	136.253	120.868	136.014	133.695	146.766	129.742	61.8544	46.5048	24.0489	2.8258	0.000780415	0.00234124	0.00702378	0.0210713	0.0632139	0.189642	0.568925	1.70678	5.12033	15.361	46.0829	Lapatinib	EGFR	EGFR (HER1; erbB1) inhibitor	C[S+]([O-])(=O)CCNCC1=CC=C(O1)C2=CC3=C(NC4=CC=C(OCC5=CC(=CC=C5)F)C(=C4)Cl)N=CN=C3C=C2
NCGC00167513-03	Vandetanib	EGFR	EGFR (HER1; erbB1) Inhibitor	s-ewing-osteo-TC71-1	activity	1.1	-1.2	-5.22921	1.111	84.3621	130.155	90.0242	11	581.333	579.873	0.924468	0.00135416	130.468	131.42	138.155	123.161	127.095	128.649	128.336	116.138	113.812	91.6602	90.0242	0.000780415	0.00234124	0.00702378	0.0210713	0.0632139	0.189642	0.568925	1.70678	5.12033	15.361	46.0829	Vandetanib	EGFR	EGFR (HER1; erbB1) Inhibitor	COC1=CC2=C(NC3=CC=C(Br)C=C3F)N=CN=C2C=C1OCC4CCN(C)CC4
NCGC00167518-03	Temsirolimus	MTOR	mTOR inhibitor	s-ewing-osteo-TC71-1	activity	4	-3	-4.52921	4.09497	-2.15005	78.4521	9.09616	11	355.599	354.838	0.982958	5.233e-06	81.7406	81.9806	79.5213	75.6956	77.2386	81.915	73.3623	77.2211	76.9795	73.699	9.09616	0.000780415	0.00234124	0.00702378	0.0210713	0.0632139	0.189642	0.568925	1.70678	5.12033	15.361	46.0829	Temsirolimus	MTOR	mTOR inhibitor	CO[C@@H]1C[C@@H](CC[C@H]1OC(=O)C(C)(CO)CO)C[C@@H](C)[C@@H]2CC(=O)[C@H](C)\C=C(C)\[C@@H](O)[C@@H](OC)C(=O)[C@H](C)C[C@H](C)\C=C\C=C\C=C(C)\[C@H](C[C@@H]3CC[C@@H](C)[C@@](O)(O3)C(=O)C(=O)N4CCCC[C@H]4C(=O)O2)OC
NCGC00167519-04	Ramatroban	PTGDR2	prostaglandin D2 CRTH2 inhibitor	s-ewing-osteo-TC71-1	activity	1.3	4	-4.82921	3.98997	113.031	131.377	113.172	11	621.693	623.01	0.821049	0.0223938	126.377	129.938	131.837	131.39	135.338	127.181	132.457	133.991	134.424	121.034	113.172	0.000780415	0.00234124	0.00702378	0.0210713	0.0632139	0.189642	0.568925	1.70678	5.12033	15.361	46.0829	Ramatroban	PTGDR2	prostaglandin D2 CRTH2 inhibitor	OC(=O)CC[N]1C2=C(C[C@@H](CC2)N[S+]([O-])(=O)C3=CC=C(F)C=C3)C4=CC=CC=C14
NCGC00167520-03	Cilomilast	PDE4A	Phosphodiesterase IIII (PDE4) inhibitor	s-ewing-osteo-TC71-1	activity	2.3	4	-4.72921	1.53859	96.139	118.557	99.4586	11	558.775	559.296	0.51844	0.242519	116.057	115.479	115.628	114.831	126.683	111.464	123.911	127.923	109.874	111.293	99.4586	0.000780415	0.00234124	0.00702378	0.0210713	0.0632139	0.189642	0.568925	1.70678	5.12033	15.361	46.0829	Cilomilast	PDE4A	Phosphodiesterase IIII (PDE4) inhibitor	COC1=CC=C(C=C1OC2CCCC2)C3(CCC(CC3)C(O)=O)C#N
NCGC00167524-03	Amorolfine hydrochloride	NA	Antifungal Agent	s-ewing-osteo-TC71-1	activity	1.3	4	-6.62921	1.44872	114.456	105.99	100.387	11	529.167	527.39	0.650852	0.153372	109.456	100.734	107.295	106.47	108.415	109.168	111.651	116.62	115.83	110.811	100.387	0.000780415	0.00234124	0.00702378	0.0210713	0.0632139	0.189642	0.568925	1.70678	5.12033	15.361	46.0829	Amorolfine hydrochloride	NA	Antifungal Agent	CCC(C)(C)C1=CC=C(CC(C)CN2C[C@H](C)O[C@H](C)C2)C=C1
NCGC00167525-03	Tazarotene	RARB	Retinoid RAR Agonists?	s-ewing-osteo-TC71-1	activity	1.3	4	-7.42921	1.1	121.4	109.9	123.217	11	564.156	564.639	0.722555	0.0740052	108.4	111.195	115.975	108.879	118.474	122.153	121.462	122.32	116.248	121.765	123.217	0.000780415	0.00234124	0.00702378	0.0210713	0.0632139	0.189642	0.568925	1.70678	5.12033	15.361	46.0829	Tazarotene	RARB	Retinoid RAR Agonists?	CCOC(=O)C1=CC=C(N=C1)C#CC2=CC=C3SCCC(C)(C)C3=C2
NCGC00167526-03	Camostat mesylate	NA	Serine Protease Inhibitor	s-ewing-osteo-TC71-1	activity	2.1	-2.2	-4.77921	0.9	21.2282	112.852	44.2114	11	483.96	483.149	0.959708	0.000139021	116.034	110.84	115.825	115.203	114.618	100.905	109.938	97.1114	93.7649	71.0201	44.2114	0.000780415	0.00234124	0.00702378	0.0210713	0.0632139	0.189642	0.568925	1.70678	5.12033	15.361	46.0829	Camostat mesylate	NA	Serine Protease Inhibitor	CN(C)C(=O)COC(=O)CC1=CC=C(OC(=O)C2=CC=C(NC(N)=N)C=C2)C=C1
NCGC00167531-03	Rivastigmine tartrate	ACHE	Acetylcholinesterase Inhibitors	s-ewing-osteo-TC71-1	activity	2.3	4	-4.52921	0.7	104.441	125.45	111.026	11	591.197	592.355	0.429116	0.324067	123.95	122.196	131.642	119.236	131.082	129.511	117.032	124.724	118.628	121.735	111.026	0.000780415	0.00234124	0.00702378	0.0210713	0.0632139	0.189642	0.568925	1.70678	5.12033	15.361	46.0829	Rivastigmine tartrate	ACHE	Acetylcholinesterase Inhibitors	CCN(C)C(=O)OC1=CC(=CC=C1)[C@H](C)N(C)C
NCGC00167532-01	Balofloxacin	NA	Antibacterial	s-ewing-osteo-TC71-1	activity	2.1	-2.1	-4.72921	2.40638	42.7046	127.226	44.3892	11	573.342	571.03	0.970076	4.54375e-05	128.619	125.168	124.817	121.209	132.831	127.674	127.258	133.32	118.234	96.5123	44.3892	0.000780415	0.00234124	0.00702378	0.0210713	0.0632139	0.189642	0.568925	1.70678	5.12033	15.361	46.0829	Balofloxacin	NA	Antibacterial	CNC1CCCN(C1)c2c(F)cc3c(c2OC)N(C=C(C3=O)C(=O)O)C4CC4
NCGC00167533-03	Vardenafil	PDE5A	Phosphodiesterase V (PDE5) inhibitor	s-ewing-osteo-TC71-1	activity	4	-1.1	-5.07921	2.25265	-7.12675	130.729	3.03567	11	520.42	522.137	0.989479	7.955e-07	130.066	130.498	135.569	125.731	133.822	133.176	128.013	122.311	104.204	14.2491	3.03567	0.000780415	0.00234124	0.00702378	0.0210713	0.0632139	0.189642	0.568925	1.70678	5.12033	15.361	46.0829	Vardenafil	PDE5A	Phosphodiesterase V (PDE5) inhibitor	CCCC1=NC(=C2[N]1NC(=N\C2=O)/C3=CC(=CC=C3OCC)[S+]([O-])(=O)N4CCN(CC)CC4)C
NCGC00167535-01	Tenofovir disoproxil fumarate	TERT	Reverse Transcriptase Inhibitor	s-ewing-osteo-TC71-1	activity	1.3	4	-7.87921	4.95492	122.474	106.805	126.317	11	569.639	568.992	0.709138	0.0827677	106.474	107.892	106.333	121.387	118.277	119.849	129.213	129.837	114.475	119.514	126.317	0.000780415	0.00234124	0.00702378	0.0210713	0.0632139	0.189642	0.568925	1.70678	5.12033	15.361	46.0829	Tenofovir disoproxil fumarate	TERT	Reverse Transcriptase Inhibitor	O=C(O)C=CC(=O)O.CC(C)OC(=O)OCOP(=O)(OCOC(=O)OC(C)C)CO[C@H](C)Cn2cnc1c(N)ncnc12
NCGC00167558-01	Fleroxacin	NA	Quinoline Antibiotic	s-ewing-osteo-TC71-1	activity	1.3	4	-7.92921	4.95492	125.923	111.792	130.049	11	588.54	586.825	0.759283	0.0511912	117.423	109.401	108.564	129.555	125.781	127.246	120.577	127.752	125.035	122.624	130.049	0.000780415	0.00234124	0.00702378	0.0210713	0.0632139	0.189642	0.568925	1.70678	5.12033	15.361	46.0829	Fleroxacin	NA	Quinoline Antibiotic	CN1CCN(CC1)c2c(F)c3c(cc2F)C(=O)C(=CN3CCF)C(=O)O
NCGC00167565-01	Carbazochrome sodium sulfonate	NA	Hemostatics	s-ewing-osteo-TC71-1	activity	1.3	1.4	-8.22921	0.4	129.775	100.275	118.367	11	586.821	587.181	0.647786	0.154857	104.275	114.729	120.444	115.354	125.166	124.496	118.463	121.733	136.993	127.78	118.367	0.000780415	0.00234124	0.00702378	0.0210713	0.0632139	0.189642	0.568925	1.70678	5.12033	15.361	46.0829	Carbazochrome sodium sulfonate	NA	Hemostatics	[Na+].NC(=O)N\N=C1/C=C2CC(N(C)C2=CC1=O)S([O-])(=O)=O
NCGC00167739-03	GW-4064X	NA	Farnesoid X Receptor Agonist	s-ewing-osteo-TC71-1	activity	2.1	-2.2	-4.72921	4.95492	82.2162	128.449	85.287	11	598.75	600.937	0.94632	0.000400215	122.449	131.042	127.916	130.911	130.12	131.672	127.884	123.444	130.319	115.997	85.287	0.000780415	0.00234124	0.00702378	0.0210713	0.0632139	0.189642	0.568925	1.70678	5.12033	15.361	46.0829	GW-4064X	NA	Farnesoid X Receptor Agonist	CC(C)C1=C(COC2=CC=C(\C=C\C3=CC=CC(=C3)C(O)=O)C(=C2)Cl)C(=NO1)C4=C(Cl)C=CC=C4Cl
NCGC00167740-01	Costunolide	TERT	Telomerase Inhibitor	s-ewing-osteo-TC71-1	activity	2.1	-2.2	-4.62921	4.09497	45.258	129.126	51.9561	11	592.991	592.918	0.984212	3.8882e-06	133.825	130.856	125.88	130.867	133.946	126.734	127.489	129.059	125.352	115.765	51.9561	0.000780415	0.00234124	0.00702378	0.0210713	0.0632139	0.189642	0.568925	1.70678	5.12033	15.361	46.0829	Costunolide	TERT	Telomerase Inhibitor	CC/1=C/CC\C(=C/C2OC(=O)C(=C)C2CC1)C
NCGC00167746-01	PNU-120596	CHRNA7	Nicotinic alpha7 Positive Allosteric Modulators	s-ewing-osteo-TC71-1	activity	1.3	4	-6.87921	3.98997	121.327	111.966	116.462	11	562.437	563.149	0.863345	0.016144	113.327	113.34	110.109	112.024	111.575	119.293	123.453	120.489	117.948	124.128	116.462	0.000780415	0.00234124	0.00702378	0.0210713	0.0632139	0.189642	0.568925	1.70678	5.12033	15.361	46.0829	PNU-120596	CHRNA7	Nicotinic alpha7 Positive Allosteric Modulators	COC1=C(Cl)C=C(NC(=O)NC2=NOC(=C2)C)C(=C1)OC
NCGC00167751-03	SSR-69071	ELA2	Leukocyte Elastase Inhibitor	s-ewing-osteo-TC71-1	activity	4	-2.1	-4.72921	2.33317	26.5021	118.092	27.8092	11	526.046	527.841	0.949917	0.000310289	107.233	113.161	119.819	115.404	121.429	124.263	124.994	122.296	108.055	87.2965	27.8092	0.000780415	0.00234124	0.00702378	0.0210713	0.0632139	0.189642	0.568925	1.70678	5.12033	15.361	46.0829	SSR-69071	ELA2	Leukocyte Elastase Inhibitor	COC1=CC(=C2C(=O)N(COC/3=C/C(=O)N4\C=C/C=C(OCCN5CCCCC5)\C4=N3)[S+]([O-])(=O)C2=C1)C(C)C
NCGC00167767-03	IKK16	IKBKB	IKK1	s-ewing-osteo-TC71-1	activity	4	-2.1	-4.72921	2.25265	25.4262	135.253	27.5448	11	599.976	600.163	0.946237	0.000401793	133.474	138.995	141.837	124.908	140.173	146.197	130.309	133.217	119.662	100.03	27.5448	0.000780415	0.00234124	0.00702378	0.0210713	0.0632139	0.189642	0.568925	1.70678	5.12033	15.361	46.0829	IKK16	IKBKB	IKK1	IKK-2	IKK complex inhibitor	O=C(N1CCC(CC1)N2CCCC2)C3=CC=C(NC4=NC=CC(=N4)C5=CC6=C(S5)C=CC=C6)C=C3
NCGC00167768-02	KI-8751	FLT1	VEGFR-2 inhibitor	s-ewing-osteo-TC71-1	activity	2.3	-2.2	-4.67921	1.82648	55.4357	133.993	61.8526	11	609.966	608.845	0.855325	0.0117061	142.064	131.394	126.317	126.866	152.565	133.942	127.047	130.716	125.109	115.571	61.8526	0.000780415	0.00234124	0.00702378	0.0210713	0.0632139	0.189642	0.568925	1.70678	5.12033	15.361	46.0829	KI-8751	FLT1	VEGFR-2 inhibitor	COC1=C(OC)C=C2C(=CC=NC2=C1)OC3=CC=C(NC(=O)NC4=CC=C(F)C=C4F)C(=C3)F
NCGC00167773-03	TPCA-1	IKBKB	IKK beta inhibitor	s-ewing-osteo-TC71-1	activity	4	-1.1	-5.77921	1.24751	15.8899	145.983	12.242	11	508.644	510.284	0.990121	6.213e-07	142.526	145.452	150.52	145.172	146.185	131.849	121.408	79.6835	35.8644	35.0783	12.242	0.000780415	0.00234124	0.00702378	0.0210713	0.0632139	0.189642	0.568925	1.70678	5.12033	15.361	46.0829	TPCA-1	IKBKB	IKK beta inhibitor	NC(=O)NC1=C(C=C(S1)C2=CC=C(F)C=C2)C(N)=O
NCGC00167781-07	Cetirizine hydrochloride	HRH1	Histamine H1 Receptor Antagonists	s-ewing-osteo-TC71-1	activity	5	4	NA	NA	NA	NA	118.558	11	NA	631.467	NA	NA	136.938	130.723	126.723	127.974	138.488	130.482	138.333	134.297	129.422	130.498	118.558	0.000780415	0.00234124	0.00702378	0.0210713	0.0632139	0.189642	0.568925	1.70678	5.12033	15.361	46.0829	Cetirizine hydrochloride	HRH1	Histamine H1 Receptor Antagonists	OC(=O)COCCN1CCN(CC1)C(C2=CC=CC=C2)C3=CC=C(Cl)C=C3
NCGC00167785-02	PAC-1	CASP3	Procaspase 3 Activator	s-ewing-osteo-TC71-1	activity	4	-1.1	-5.32921	1.80795	13.9946	131.835	9.75793	11	511.992	513.113	0.986593	2.0554e-06	134.366	127.634	131.339	130.51	127.673	130.867	136.31	120.63	62.0887	35.5961	9.75793	0.000780415	0.00234124	0.00702378	0.0210713	0.0632139	0.189642	0.568925	1.70678	5.12033	15.361	46.0829	PAC-1	CASP3	Procaspase 3 Activator	OC1=C(C=CC=C1CC=C)/C=N/NC(=O)CN2CCN(CC2)CC3=CC=CC=C3
NCGC00167798-02	Oxaliplatin	NA	DNA Alkylating Agent	s-ewing-osteo-TC71-1	activity	1.3	4	-8.37921	0.5	147.74	125.24	113.707	11	686.8	685.994	0.655055	0.148869	129.24	135.41	145.232	132.865	143.199	144.068	148.464	149.991	146.981	144.161	113.707	0.000780415	0.00234124	0.00702378	0.0210713	0.0632139	0.189642	0.568925	1.70678	5.12033	15.361	46.0829	Oxaliplatin	NA	DNA Alkylating Agent	O=C1O[Pt]2(NC3CCCCC3N2)OC1=O
NCGC00167801-01	CL 82198	MMP13	MMP-13 Inhibitor	s-ewing-osteo-TC71-1	activity	2.3	4	-4.42921	4.95492	97.3896	119.02	102.995	11	567.559	570.075	0.455722	0.299808	111.02	118.657	124.941	115.982	121.63	128.555	120.785	120.379	110.512	118.725	102.995	0.000780415	0.00234124	0.00702378	0.0210713	0.0632139	0.189642	0.568925	1.70678	5.12033	15.361	46.0829	CL 82198	MMP13	MMP-13 Inhibitor	O=C(NCCCCN1CCOCC1)C2=CC3=CC=CC=C3O2
NCGC00167803-03	GSI-9	NOTCH1	g-Secretase Inhibitor	s-ewing-osteo-TC71-1	activity	1.3	4	-4.92921	0.2	102.922	132.236	110.557	11	590.26	591.388	0.541951	0.221677	128.736	131.727	127.765	121.228	117.41	124.354	127.754	120.902	119.064	121.429	110.557	0.000780415	0.00234124	0.00702378	0.0210713	0.0632139	0.189642	0.568925	1.70678	5.12033	15.361	46.0829	GSI-9	NOTCH1	g-Secretase Inhibitor	C[C@H](NC(=O)CC1=CC(=CC(=C1)F)F)C(=O)N[C@H](C(=O)OC(C)(C)C)C2=CC=CC=C2
NCGC00167805-02	Ivachtin	CASP3	Caspase 3 inhibitor	s-ewing-osteo-TC71-1	activity	1.3	1.2	-7.72921	1	129.882	108.882	124.06	11	594.945	596.514	0.820951	0.0223653	109.882	110.759	115.411	119.924	124.735	128.771	129.184	125.464	139.174	130.629	124.06	0.000780415	0.00234124	0.00702378	0.0210713	0.0632139	0.189642	0.568925	1.70678	5.12033	15.361	46.0829	Ivachtin	CASP3	Caspase 3 inhibitor	CC(=O)OCCN1C(=O)C2=C(C)N=C3C=CC(=CC3=C2C1=O)[S+]([O-])(=O)N4CCOCC4
NCGC00167811-03	GW-9508	FFAR1	Free Fatty Acid Receptor 1 Agonist	s-ewing-osteo-TC71-1	activity	1.3	4	-7.02921	0.8	127.167	116.51	119.593	11	589.005	589.863	0.321863	0.439451	113.667	119.794	128.302	109.37	119.509	126.176	128.258	122.146	130.219	124.304	119.593	0.000780415	0.00234124	0.00702378	0.0210713	0.0632139	0.189642	0.568925	1.70678	5.12033	15.361	46.0829	GW-9508	FFAR1	Free Fatty Acid Receptor 1 Agonist	OC(=O)CCC1=CC=C(NCC2=CC=CC(=C2)OC3=CC=CC=C3)C=C1
NCGC00167831-01	SN-38	TOP1	DNA Topoisomerase I Inhibitors	s-ewing-osteo-TC71-1	activity	4	-1.1	-8.62921	2.33317	5.59943	145.778	3.47149	11	96.7888	97.1389	0.998795	1e-10	136.468	75.4117	13.623	6.96825	6.50623	6.61555	8.47201	6.23474	5.01231	4.52225	3.47149	0.000780415	0.00234124	0.00702378	0.0210713	0.0632139	0.189642	0.568925	1.70678	5.12033	15.361	46.0829	SN-38	TOP1	DNA Topoisomerase I Inhibitors	CCC1=C2CN3C(=O)\C4=C(/C=C3/C2=NC5=CC=C(O)C=C15)[C@@](O)(CC)C(=O)OC4
NCGC00167832-04	Carvedilol	ADRB1	beta1-Adrenoceptor Antagonists	s-ewing-osteo-TC71-1	activity	2.3	-3	-4.67921	4.50447	88.618	132.628	91.1372	11	621.559	623.325	0.893626	0.00435884	128.637	130.834	130.183	141.328	132.034	140.221	127.839	132.504	130.678	124.152	91.1372	0.000780415	0.00234124	0.00702378	0.0210713	0.0632139	0.189642	0.568925	1.70678	5.12033	15.361	46.0829	Carvedilol	ADRB1	beta1-Adrenoceptor Antagonists	COC1=C(OCCNCC(O)COC2=CC=CC3=C2C4=CC=CC=C4[NH]3)C=CC=C1
NCGC00167967-01	Telithromycin	NA	Ketolide antibiotic	s-ewing-osteo-TC71-1	activity	2.1	-2.2	-4.52921	1.88512	36.4084	123.351	58.8195	11	565.245	564.234	0.952383	0.000257973	128.854	126.693	124.151	124.188	115.458	121.954	125.225	117.372	120.326	109.007	58.8195	0.000780415	0.00234124	0.00702378	0.0210713	0.0632139	0.189642	0.568925	1.70678	5.12033	15.361	46.0829	Telithromycin	NA	Ketolide antibiotic	CC[C@H]1OC(=O)[C@H](C)C(=O)[C@H](C)[C@@H](O[C@H]2O[C@H](C)C[C@@H]([C@H]2O)N(C)C)[C@@](C)(C[C@@H](C)C(=O)[C@H](C)[C@H]3N(CCCC[N]4C=NC(=C4)C5=CN=CC=C5)C(=O)O[C@]13C)OC
NCGC00167971-03	Tiotropium bromide	NA	Muscarinic M3 Antagonists	s-ewing-osteo-TC71-1	activity	1.3	4	-7.77921	1.47874	122.112	106.612	123.86	11	566.301	566.277	0.672212	0.109953	106.112	108.74	109.764	115.835	120.355	120.55	125.279	123.794	110.345	128.015	123.86	0.000780415	0.00234124	0.00702378	0.0210713	0.0632139	0.189642	0.568925	1.70678	5.12033	15.361	46.0829	Tiotropium bromide	NA	Muscarinic M3 Antagonists	C[N+]1(C)[C@@H]2CC(C[C@H]1[C@@H]3O[C@H]23)OC(=O)C(O)(C4=CC=CS4)C5=CC=CS5
NCGC00167977-03	Bicalutamide	AR	Androgen Receptor Antagonist	s-ewing-osteo-TC71-1	activity	4	-1.1	-5.62921	2.25265	-0.747111	117.174	1.40703	11	406.653	407.43	0.987975	1.3433e-06	109.114	114.927	114.496	118.253	113.184	118.976	125.404	78.4859	10.7352	4.10702	1.40703	0.000780415	0.00234124	0.00702378	0.0210713	0.0632139	0.189642	0.568925	1.70678	5.12033	15.361	46.0829	Bicalutamide	AR	Androgen Receptor Antagonist	CC(O)(C[S+]([O-])(=O)C1=CC=C(F)C=C1)C(=O)NC2=CC=C(C#N)C(=C2)C(F)(F)F
NCGC00167978-02	Ceftiofur hydrochloride	NA	Cephalosporin antibiotic	s-ewing-osteo-TC71-1	activity	1.3	2.4	-5.42921	0.6	147.959	122.743	141.012	11	621.894	622.295	0.787753	0.0363539	122.459	121.704	121.446	124.922	129.803	123.654	127.026	136.565	129.87	147.073	141.012	0.000780415	0.00234124	0.00702378	0.0210713	0.0632139	0.189642	0.568925	1.70678	5.12033	15.361	46.0829	Ceftiofur hydrochloride	NA	Cephalosporin antibiotic	CO\N=C(C(=O)N[C@H]1[C@H]2SC\C(=C(/N2C1=O)C(O)=O)CSC(=O)C3=CC=CO3)/C4=CSC(=N4)N
NCGC00167982-02	Pirarubicin	TOP2A	DNA Topoisomerase II Inhibitors	s-ewing-osteo-TC71-1	activity	4	-1.1	-6.17921	1.96734	1.72844	126.135	1.2341	11	372.649	373.137	0.991099	4.122e-07	124.819	130.935	118.77	132.853	127.85	108.37	76.0797	10.5386	7.00072	6.54282	1.2341	0.000780415	0.00234124	0.00702378	0.0210713	0.0632139	0.189642	0.568925	1.70678	5.12033	15.361	46.0829	Pirarubicin	TOP2A	DNA Topoisomerase II Inhibitors	COC1=C2C(=O)C3=C(C(=C4C[C@](O)(C[C@H](O[C@H]5C[C@H](N)[C@H](O[C@H]6CCCCO6)[C@H](C)O5)C4=C3O)C(=O)CO)O)C(=O)C2=CC=C1
NCGC00168041-01	Dextromethorphan hydrobromide	GRIN2A	NMDA Antagonist	s-ewing-osteo-TC71-1	activity	2.3	4	-4.72921	4.95492	111.725	129.326	111.909	11	614.52	616.682	0.695786	0.0924801	122.826	123.098	128.942	130.312	129.678	133.109	133.115	131.909	131.734	124.932	111.909	0.000780415	0.00234124	0.00702378	0.0210713	0.0632139	0.189642	0.568925	1.70678	5.12033	15.361	46.0829	Dextromethorphan hydrobromide	GRIN2A	NMDA Antagonist	COC1=CC2=C(CC3C4CCCC[C@@]24CCN3C)C=C1
NCGC00168085-02	Suberoylanilide hydroxamic acid	HDAC1	Histone Deacetylase (HDAC) 1/2/3/6 Inhibitor	s-ewing-osteo-TC71-1	activity	4	-1.1	-5.52921	1.71374	4.97632	108.663	5.74039	11	394.688	396.343	0.983373	4.7522e-06	101.249	103.874	107.275	112.382	112.408	119.794	96.3093	80.3493	32.5243	11.8584	5.74039	0.000780415	0.00234124	0.00702378	0.0210713	0.0632139	0.189642	0.568925	1.70678	5.12033	15.361	46.0829	Suberoylanilide hydroxamic acid	HDAC1	Histone Deacetylase (HDAC) 1/2/3/6 Inhibitor	O=C(Nc1ccccc1)CCCCCCC(=O)NO
NCGC00168108-02	AG-14361	PARP1	PARP-1 Inhibitor	s-ewing-osteo-TC71-1	activity	4	-2.1	-4.72921	3.06545	24.2001	117.367	20.5135	11	523.461	522.352	0.970152	4.49964e-05	112.679	108.846	118.772	115.756	124.691	116.624	118.797	117.027	121.017	85.1506	20.5135	0.000780415	0.00234124	0.00702378	0.0210713	0.0632139	0.189642	0.568925	1.70678	5.12033	15.361	46.0829	AG-14361	PARP1	PARP-1 Inhibitor	CN(C)CC1=CC=C(C=C1)C2=NC3=CC=CC4=C3[N]2CCNC4=O
NCGC00168109-01	Secin H3	ARHGEF1	GEF inhibitor	s-ewing-osteo-TC71-1	activity	2.3	-2.2	-4.67921	1.21	81.933	136.303	91.3302	11	628.199	627.679	0.877902	0.00684346	138.316	138.902	141.463	134.318	137.188	130.147	137.234	132.476	119.726	122.495	91.3302	0.000780415	0.00234124	0.00702378	0.0210713	0.0632139	0.189642	0.568925	1.70678	5.12033	15.361	46.0829	Secin H3	ARHGEF1	GEF inhibitor	COC1=N[N](C2=CC=C(NC(=O)CSC3=CC=CC=C3)C=C2)C(=N1)C4=CC=C5OCOC5=C4
NCGC00168110-01	Tozasertib	AURKA	Aurora-A/B/C Kinase Inhibitor	s-ewing-osteo-TC71-1	activity	1.1	-2.1	-5.17921	0.5	6.96606	130.166	36.8082	11	484.928	484.353	0.931317	0.000967988	130.065	130.801	117.35	122.254	127.388	122.466	82.447	88.8527	79.5172	57.9093	36.8082	0.000780415	0.00234124	0.00702378	0.0210713	0.0632139	0.189642	0.568925	1.70678	5.12033	15.361	46.0829	Tozasertib	AURKA	Aurora-A/B/C Kinase Inhibitor	CN1CCN(CC1)C2=CC(=NC(=N2)SC3=CC=C(NC(=O)C4CC4)C=C3)NC5=CC(=N[NH]5)C
NCGC00168114-03	IC-87114	PIK3CA	PI3K inhibitor	s-ewing-osteo-TC71-1	activity	4	-1.1	-5.72921	0.5	-4.4705	107.092	13.6428	11	339.991	339.265	0.991628	3.24e-07	104.21	104.816	96.8191	101.356	88.2375	81.2701	62.165	56.3457	38.2213	21.8955	13.6428	0.000780415	0.00234124	0.00702378	0.0210713	0.0632139	0.189642	0.568925	1.70678	5.12033	15.361	46.0829	IC-87114	PIK3CA	PI3K inhibitor	CC1=CC=CC=C1N2\C(=N/C3=C(C(=CC=C3)C)C2=O)C[N]4C=NC5=C4N=CN=C5N
NCGC00168459-04	NCGC00168459-01	PDE4A	Phosphodiesterase IIII (PDE4) inhibitor	s-ewing-osteo-TC71-1	activity	4	-2.1	-4.77921	3.132	3.15994	120.54	5.37219	11	522.54	521.572	0.970736	4.17364e-05	115.985	116.316	112.451	119.163	117.338	118.53	125.192	135.53	122.149	65.4156	5.37219	0.000780415	0.00234124	0.00702378	0.0210713	0.0632139	0.189642	0.568925	1.70678	5.12033	15.361	46.0829	NCGC00168459-01	PDE4A	Phosphodiesterase IIII (PDE4) inhibitor	COC1=CC(=C(OC)C=C1)C2=NN=C3C=CC(=N[N]23)C4=CC(=C(OC)C=C4)O[C@@H]5CCOC5
NCGC00168759-04	PTC-124	CFTR	CFTR-G542X nonsense allele inhibitor	s-ewing-osteo-TC71-1	activity	2.1	-2.2	-4.67921	4.09497	51.7893	119.392	56.5925	11	548.866	550.894	0.928851	0.0010971	114.503	128.804	127.316	123.184	119.029	120.287	114.762	113.244	114.34	103.904	56.5925	0.000780415	0.00234124	0.00702378	0.0210713	0.0632139	0.189642	0.568925	1.70678	5.12033	15.361	46.0829	PTC-124	CFTR	CFTR-G542X nonsense allele inhibitor	OC(=O)C1=CC=CC(=C1)C2=NOC(=N2)C3=CC=CC=C3F
NCGC00168773-01	Darunavir	NA	HIV Protease Inhibitors	s-ewing-osteo-TC71-1	activity	1.1	-1.2	-5.42921	2.95227	84.8781	124.655	83.1268	11	554.129	556.506	0.963822	9.30223e-05	118.655	121.799	131.696	124.67	124.19	126.687	125.4	121.5	95.8791	87.4975	83.1268	0.000780415	0.00234124	0.00702378	0.0210713	0.0632139	0.189642	0.568925	1.70678	5.12033	15.361	46.0829	Darunavir	NA	HIV Protease Inhibitors	Nc1ccc(cc1)S(=O)(=O)N(CC(C)C)C[C@@H](O)[C@H](Cc2ccccc2)NC(=O)O[C@H]3CO[C@H]4OCC[C@@H]34
NCGC00168774-01	Rasagiline mesylate	MAOB	MAO-B Inhibitor	s-ewing-osteo-TC71-1	activity	2.3	4	-4.62921	4.09497	115.015	126.49	115.594	11	604.205	605.111	0.661956	0.119128	123.49	129.694	129.008	126.244	130.646	125.813	123.444	125.172	125.317	124.79	115.594	0.000780415	0.00234124	0.00702378	0.0210713	0.0632139	0.189642	0.568925	1.70678	5.12033	15.361	46.0829	Rasagiline mesylate	MAOB	MAO-B Inhibitor	CS(=O)(=O)O.C#CCN[C@@H]2CCc1ccccc12
NCGC00168781-01	Tadalafil	PDE5A	Phosphodiesterase V (PDE5) inhibitor	s-ewing-osteo-TC71-1	activity	1.3	-1.4	-5.67921	1.96734	104.307	131.621	97.1613	11	595.002	596.542	0.726513	0.0709173	133.621	123.181	135.432	135.75	131.067	132.824	127.044	125.124	97.4344	119.831	97.1613	0.000780415	0.00234124	0.00702378	0.0210713	0.0632139	0.189642	0.568925	1.70678	5.12033	15.361	46.0829	Tadalafil	PDE5A	Phosphodiesterase V (PDE5) inhibitor	O=C6N(C)CC(=O)N4[C@@H]6Cc1c5ccccc5nc1[C@H]4c2ccc3OCOc3c2
NCGC00168784-01	Gemcitabine hydrochloride	RRM2	ribonucleotide reductase inhibitor	s-ewing-osteo-TC71-1	activity	4	-1.1	-7.37921	1.92824	5.43104	131.618	3.3147	11	244.209	242.532	0.997974	1.2e-09	135.586	129.993	123.013	106.609	45.4118	7.8105	7.72482	6.66916	6.36883	5.02643	3.3147	0.000780415	0.00234124	0.00702378	0.0210713	0.0632139	0.189642	0.568925	1.70678	5.12033	15.361	46.0829	Gemcitabine hydrochloride	RRM2	ribonucleotide reductase inhibitor	Cl.NC1=NC(=O)N(C=C1)[C@@H]2O[C@H](CO)[C@@H](O)C2(F)F
NCGC00168785-02	Diclazuril	NA	antiprotozoal agent	s-ewing-osteo-TC71-1	activity	2.1	-3	-4.52921	4.09497	35.3056	114.233	46.1732	11	528.034	528.462	0.934873	0.000801772	110.713	114.485	109.28	114.341	115.732	115.249	125.77	117.253	103.843	109.78	46.1732	0.000780415	0.00234124	0.00702378	0.0210713	0.0632139	0.189642	0.568925	1.70678	5.12033	15.361	46.0829	Diclazuril	NA	antiprotozoal agent	ClC1=CC=C(C=C1)C(C#N)C2=C(Cl)C=C(C=C2Cl)N3\N=C/C(=O)NC3=O
NCGC00168853-03	Lupeol	NA	Steroid	s-ewing-osteo-TC71-1	activity	1.3	4	-8.27921	1.50949	129.816	120.816	122.858	11	616.353	614.544	0.4691	0.316568	120.816	123.586	125.209	130.083	129.148	127.915	132.057	136.358	130.713	122.31	122.858	0.000780415	0.00234124	0.00702378	0.0210713	0.0632139	0.189642	0.568925	1.70678	5.12033	15.361	46.0829	Lupeol	NA	Steroid	CC(=C)[C@@H]1CC[C@]2(C)CC[C@]3(C)[C@H](CC[C@@H]4[C@@]5(C)CC[C@H](O)C(C)(C)[C@@H]5CC[C@@]34C)[C@@H]12
NCGC00169145-02	Salidroside	APP	beta-Amyloid (Abeta) Protein Neurotoxicity Inhibitors	s-ewing-osteo-TC71-1	activity	2.3	-3	-4.62921	4.09497	78.2289	134.991	82.7576	11	630.123	629.197	0.825056	0.020833	137.142	139.326	129.749	149.275	134.06	142.307	126.59	125.237	128.671	127.425	82.7576	0.000780415	0.00234124	0.00702378	0.0210713	0.0632139	0.189642	0.568925	1.70678	5.12033	15.361	46.0829	Salidroside	APP	beta-Amyloid (Abeta) Protein Neurotoxicity Inhibitors	Oc2ccc(CCO[C@@H]1O[C@H](CO)[C@@H](O)[C@H](O)[C@H]1O)cc2
NCGC00169864-03	Sesamin	NFKB1	NF-kappaB Activation Inhibitor	s-ewing-osteo-TC71-1	activity	2.3	-3	-4.67921	4.50447	95.9674	127.794	97.2042	11	602.737	604.023	0.728659	0.0695864	122.794	126.3	117.283	125.746	130.763	138.393	124.353	130.976	133.335	121.606	97.2042	0.000780415	0.00234124	0.00702378	0.0210713	0.0632139	0.189642	0.568925	1.70678	5.12033	15.361	46.0829	Sesamin	NFKB1	NF-kappaB Activation Inhibitor	C1OC2=C(O1)C=C(C=C2)[C@H]3OC[C@H]4[C@@H]3CO[C@@H]4C5=CC6=C(OCO6)C=C5
NCGC00173359-06	Tetrahydroberberine	NA	K+/ATP Signaling Inhibitor	s-ewing-osteo-TC71-1	activity	2.1	-2.2	-4.67921	4.09497	34.7555	113.313	41.1034	11	515.594	515.85	0.963019	0.000100938	115.628	106.326	109.13	115.642	114.44	119.254	118.26	110.496	108.504	97.7022	41.1034	0.000780415	0.00234124	0.00702378	0.0210713	0.0632139	0.189642	0.568925	1.70678	5.12033	15.361	46.0829	Tetrahydroberberine	NA	K+/ATP Signaling Inhibitor	COC1=C(OC)C2=C(CC3N(CCC4=C3C=C5OCOC5=C4)C2)C=C1
NCGC00174736-02	Uridine triacetate	NA	Pyrimidine Antagonists	s-ewing-osteo-TC71-1	activity	5	4	NA	NA	NA	NA	118.922	11	NA	613.251	NA	NA	133.333	117.43	136.403	124.867	133.583	125.034	138.736	122.396	132.161	119.746	118.922	0.000780415	0.00234124	0.00702378	0.0210713	0.0632139	0.189642	0.568925	1.70678	5.12033	15.361	46.0829	Uridine triacetate	NA	Pyrimidine Antagonists	CC(=O)OC[C@@H]1O[C@H]([C@H](OC(C)=O)[C@@H]1OC(C)=O)N2\C=C/C(=O)NC2=O
NCGC00177979-03	Azelastine hydrochloride	HRH1	Histamine H1 Receptor Antagonists	s-ewing-osteo-TC71-1	activity	4	-1.1	-5.57921	1.1	-5.21751	127.449	4.92146	11	440.783	442.642	0.986493	2.116e-06	122.816	125.13	119.162	130.496	137.288	119.811	111.18	72.1785	33.9862	14.2675	4.92146	0.000780415	0.00234124	0.00702378	0.0210713	0.0632139	0.189642	0.568925	1.70678	5.12033	15.361	46.0829	Azelastine hydrochloride	HRH1	Histamine H1 Receptor Antagonists	CN1CCCC(CC1)N2\N=C(CC3=CC=C(Cl)C=C3)/C4=C(C=CC=C4)C2=O
NCGC00177986-04	Pefloxacin	NA	Antibacterial	s-ewing-osteo-TC71-1	activity	2.3	4	-4.62921	4.09497	113.902	137.637	115.441	11	653.74	655.4	0.638426	0.136886	130.637	143.641	135.907	133.597	138.604	141.732	145.797	138.34	129.785	134.642	115.441	0.000780415	0.00234124	0.00702378	0.0210713	0.0632139	0.189642	0.568925	1.70678	5.12033	15.361	46.0829	Pefloxacin	NA	Antibacterial	CCN1\C=C(C(O)=O)/C(=O)C2=C1C=C(N3CCN(C)CC3)C(=C2)F
NCGC00177995-04	Sarafloxacin hydrochloride	NA	Antibacterial	s-ewing-osteo-TC71-1	activity	1.3	-2.4	-5.12921	4.95492	112.732	136.766	112.738	11	638.062	639.005	0.770483	0.0449649	130.266	138.098	146.438	136.523	143.04	135.41	135.436	127.481	133.745	113.247	112.738	0.000780415	0.00234124	0.00702378	0.0210713	0.0632139	0.189642	0.568925	1.70678	5.12033	15.361	46.0829	Sarafloxacin hydrochloride	NA	Antibacterial	OC(=O)\C1=C\N(C2=CC=C(F)C=C2)C3=C(C=C(F)C(=C3)N4CCNCC4)C1=O
NCGC00178054-05	Clarithromycin	NA	Macrolide Antibiotic	s-ewing-osteo-TC71-1	activity	1.3	4	-5.37921	0.7	116.355	126.387	117.777	11	595.649	597.452	0.351955	0.392255	119.887	133.923	122.167	131.07	123.162	128.915	120.68	123.732	121.497	119.477	117.777	0.000780415	0.00234124	0.00702378	0.0210713	0.0632139	0.189642	0.568925	1.70678	5.12033	15.361	46.0829	Clarithromycin	NA	Macrolide Antibiotic	CC[C@H]1OC(=O)[C@H](C)[C@@H](O[C@H]2C[C@@](C)(OC)[C@@H](O)[C@H](C)O2)[C@H](C)[C@@H](O[C@@H]3O[C@H](C)C[C@@H]([C@H]3O)N(C)C)[C@@](C)(C[C@@H](C)C(=O)[C@H](C)[C@@H](O)[C@]1(C)O)OC
NCGC00178127-04	Ramipril	ACE	Angiotensin-I Converting Enzyme Inhibitor	s-ewing-osteo-TC71-1	activity	4	-2.1	-4.82921	1.28756	-21.1289	131.244	4.15261	11	539.352	539.816	0.971429	3.81043e-05	130.56	122.42	125.29	129.531	138.86	130.84	140.952	127.51	89.2931	59.0412	4.15261	0.000780415	0.00234124	0.00702378	0.0210713	0.0632139	0.189642	0.568925	1.70678	5.12033	15.361	46.0829	Ramipril	ACE	Angiotensin-I Converting Enzyme Inhibitor	CCOC(=O)[C@H](CCC1=CC=CC=C1)N[C@@H](C)C(=O)N2[C@H]3CCC[C@H]3C[C@H]2C(O)=O
NCGC00178319-07	Thiamphenicol	NA	Antibiotic	s-ewing-osteo-TC71-1	activity	2.1	-2.1	-4.77921	1.6259	19.0011	133.511	33.128	11	581.22	581.369	0.978031	1.39514e-05	134.035	131.792	134.837	131.624	137.972	137.075	128.382	130.837	111.067	88.8657	33.128	0.000780415	0.00234124	0.00702378	0.0210713	0.0632139	0.189642	0.568925	1.70678	5.12033	15.361	46.0829	Thiamphenicol	NA	Antibiotic	C[S+]([O-])(=O)C1=CC=C(C=C1)[C@@H](O)[C@@H](CO)NC(=O)C(Cl)Cl
NCGC00178483-04	Limonin	NA	antiviral	s-ewing-osteo-TC71-1	activity	1.3	4	-7.12921	1.41632	120.561	110.74	118.301	11	560.06	560.606	0.489607	0.269273	112.061	114.767	104.711	113.049	117.121	115.559	119.972	127.15	125.658	113.025	118.301	0.000780415	0.00234124	0.00702378	0.0210713	0.0632139	0.189642	0.568925	1.70678	5.12033	15.361	46.0829	Limonin	NA	antiviral	CC1(C)O[C@H]2CC(=O)OC[C@]23[C@H]4CC[C@@]5(C)[C@@H](OC(=O)[C@H]6O[C@@]56[C@]4(C)C(=O)C[C@@H]13)C7=COC=C7
NCGC00178499-03	Cefdinir	NA	Cephalosporin antibiotic	s-ewing-osteo-TC71-1	activity	5	4	NA	NA	NA	NA	120.105	11	NA	621.252	NA	NA	134.868	119.582	126.378	130.585	127.559	128.51	125.941	143.491	129.303	134.33	120.105	0.000780415	0.00234124	0.00702378	0.0210713	0.0632139	0.189642	0.568925	1.70678	5.12033	15.361	46.0829	Cefdinir	NA	Cephalosporin antibiotic	NC1=NC(=CS1)\C(=N\O)C(=O)N[C@H]2[C@H]3SC\C(=C(/N3C2=O)C(O)=O)C=C
NCGC00178520-05	Bromhexine hydrochloride	NA	Mucolytic Agent	s-ewing-osteo-TC71-1	activity	2.3	4	-4.77921	4.44947	102.546	125.094	102.888	11	590.671	592.273	0.593332	0.175217	119.594	113.72	121.382	126.639	123.178	129.912	133.396	125.49	133.214	115.534	102.888	0.000780415	0.00234124	0.00702378	0.0210713	0.0632139	0.189642	0.568925	1.70678	5.12033	15.361	46.0829	Bromhexine hydrochloride	NA	Mucolytic Agent	CN(CC1=C(N)C(=CC(=C1)Br)Br)C2CCCCC2
NCGC00178529-03	Levofloxacin	TOP2B	DNA Topoisomerase IV Inhibitors; Antibiotic	s-ewing-osteo-TC71-1	activity	1.3	1.4	-5.87921	4.95492	139.46	123.718	127.43	11	619.974	620.817	0.822565	0.0322686	124.46	126.406	123.894	119.258	127.667	122.882	121.067	135.764	134.718	144.376	127.43	0.000780415	0.00234124	0.00702378	0.0210713	0.0632139	0.189642	0.568925	1.70678	5.12033	15.361	46.0829	Levofloxacin	TOP2B	DNA Topoisomerase IV Inhibitors; Antibiotic	C[C@H]1COC2=C3N1\C=C(C(O)=O)/C(=O)C3=CC(=C2N4CCN(C)CC4)F
NCGC00178638-04	Valaciclovir	NA	DNA Polymerase Inhibitors	s-ewing-osteo-TC71-1	activity	5	4	NA	NA	NA	NA	118.041	11	NA	605.571	NA	NA	133.323	119.257	145.546	119.123	124.216	120.599	124.776	119.907	124.606	136.741	118.041	0.000780415	0.00234124	0.00702378	0.0210713	0.0632139	0.189642	0.568925	1.70678	5.12033	15.361	46.0829	Valaciclovir	NA	DNA Polymerase Inhibitors	CC(C)[C@H](N)C(=O)OCCOC[N]1C=NC2=C1\N=C(N)/NC2=O
NCGC00178697-05	Irinotecan	TOP1	DNA Topoisomerase I Inhibitors	s-ewing-osteo-TC71-1	activity	4	-1.1	-6.47921	3.1925	6.32117	130.584	10.8448	11	356.961	356.662	0.994457	6.35e-08	129.209	126.846	142.543	125.73	127.933	113.157	24.4748	5.57666	5.07988	5.35679	10.8448	0.000780415	0.00234124	0.00702378	0.0210713	0.0632139	0.189642	0.568925	1.70678	5.12033	15.361	46.0829	Irinotecan	TOP1	DNA Topoisomerase I Inhibitors	CCC1=C2C=C(OC(=O)N3CCC(CC3)N4CCCCC4)C=CC2=NC\5=C1CN6C(=O)\C7=C(/C=C56)[C@@](O)(CC)C(=O)OC7
NCGC00178698-04	Oseltamivir phosphate	NA	Neuraminidase (Sialidase) Inhibitors	s-ewing-osteo-TC71-1	activity	1.3	1.4	-8.12921	1.34372	123.084	105.084	128.171	11	573.689	572.254	0.875472	0.00732932	106.584	107.184	113.752	120.371	121.162	119.205	125.733	120.084	121.763	123.239	128.171	0.000780415	0.00234124	0.00702378	0.0210713	0.0632139	0.189642	0.568925	1.70678	5.12033	15.361	46.0829	Oseltamivir phosphate	NA	Neuraminidase (Sialidase) Inhibitors	CCOC(=O)\C1=C\[C@@H](OC(CC)CC)[C@H](NC(C)=O)[C@@H](N)C1
NCGC00178707-03	Ramelteon	MTNR1A	Melatonin MT1/MT2 Agonist	s-ewing-osteo-TC71-1	activity	1.3	-2.4	-5.62921	0.7	115.217	136.343	118.31	11	625.824	626.788	0.767438	0.0466708	131.843	132.84	141.316	141.445	132.308	134.907	125.781	128.29	126.615	116.321	118.31	0.000780415	0.00234124	0.00702378	0.0210713	0.0632139	0.189642	0.568925	1.70678	5.12033	15.361	46.0829	Ramelteon	MTNR1A	Melatonin MT1/MT2 Agonist	CCC(=O)NCC[C@@H]1CCC2=C1C3=C(OCC3)C=C2
NCGC00178734-03	Sitagliptin	DPP4	Dipeptidyl Peptidase IV (CD26; DPP-IV; DP-IV) Inhibitor	s-ewing-osteo-TC71-1	activity	2.3	-2.2	-4.77921	1	62.7964	123.531	74.1592	11	556.655	559.625	0.86904	0.00856334	116.67	120.343	129.863	131.372	119.795	122.578	125.282	118.883	100.779	103.103	74.1592	0.000780415	0.00234124	0.00702378	0.0210713	0.0632139	0.189642	0.568925	1.70678	5.12033	15.361	46.0829	Sitagliptin	DPP4	Dipeptidyl Peptidase IV (CD26; DPP-IV; DP-IV) Inhibitor	N[C@@H](CC(=O)N1CC[N]2C(=NN=C2C(F)(F)F)C1)CC3=C(F)C=C(F)C(=C3)F
NCGC00178840-06	Sodium cloxacillin	NA	beta-lactam antibiotic	s-ewing-osteo-TC71-1	activity	1.3	4	-5.12921	4.95492	123.891	140.595	128.734	11	662.36	662.178	0.623751	0.149136	136.595	139.886	137.364	146.708	146.608	136.729	146.493	132.913	139.594	119.341	128.734	0.000780415	0.00234124	0.00702378	0.0210713	0.0632139	0.189642	0.568925	1.70678	5.12033	15.361	46.0829	Sodium cloxacillin	NA	beta-lactam antibiotic	CC1=C(C(=O)N[C@H]2[C@H]3SC(C)(C)[C@@H](N3C2=O)C([O-])=O)C(=NO1)C4=C(Cl)C=CC=C4
NCGC00178852-06	Tobramycin	NA	30S Ribosomal Protein Inhibitors	s-ewing-osteo-TC71-1	activity	1.3	4	-8.27921	4.95492	121.064	128.493	123.054	11	587.851	588.956	0.323065	0.416565	124.993	132.191	122.139	117.19	120.096	126.122	128.293	115.886	116.121	123.195	123.054	0.000780415	0.00234124	0.00702378	0.0210713	0.0632139	0.189642	0.568925	1.70678	5.12033	15.361	46.0829	Tobramycin	NA	30S Ribosomal Protein Inhibitors	NC[C@H]1O[C@H](O[C@@H]2[C@@H](N)C[C@@H](N)[C@H](O[C@H]3O[C@H](CO)[C@@H](O)[C@H](N)[C@H]3O)[C@H]2O)[C@H](N)C[C@@H]1O
NCGC00178913-04	Tripterin	HSP90AB1	Heat Shock Protein 90 (hsp90) Inhibitor	s-ewing-osteo-TC71-1	activity	4	-1.1	-5.92921	3.67725	3.83624	121.393	2.67354	11	390.978	391.353	0.995966	1.8e-08	118.943	124.873	123.369	112.218	121.875	125.16	114.206	26.9863	5.69323	4.8508	2.67354	0.000780415	0.00234124	0.00702378	0.0210713	0.0632139	0.189642	0.568925	1.70678	5.12033	15.361	46.0829	Tripterin	HSP90AB1	Heat Shock Protein 90 (hsp90) Inhibitor	CC/1=C(\O)C(=O)\C=C2/C1=C/C=C3\[C@@]2(C)CC[C@@]4(C)[C@@H]5C[C@@](C)(CC[C@]5(C)CC[C@]34C)C(O)=O
NCGC00179034-08	Pentamidine isethionate	NA	PRL Phosphatase Inhibitors	s-ewing-osteo-TC71-1	activity	4	-2.1	-5.07921	0.9	-11.492	126.879	9.04357	11	489.302	493.195	0.971694	3.67769e-05	118.275	119.955	127.272	131.958	126.441	131.092	123.756	94.1564	66.2407	48.4855	9.04357	0.000780415	0.00234124	0.00702378	0.0210713	0.0632139	0.189642	0.568925	1.70678	5.12033	15.361	46.0829	Pentamidine isethionate	NA	PRL Phosphatase Inhibitors	NC(=N)C1=CC=C(OCCCCCOC2=CC=C(C=C2)C(N)=N)C=C1
NCGC00179244-04	Dorzolamide hydrochloride	CA2	Carbonic Anhydrase Type II Inhibitors	s-ewing-osteo-TC71-1	activity	2.3	4	-4.52921	4.09497	112.478	128.602	114.748	11	613.843	615.58	0.413138	0.338267	121.102	135.876	130.948	124.456	129.844	137.159	129.069	125.679	123.032	127.687	114.748	0.000780415	0.00234124	0.00702378	0.0210713	0.0632139	0.189642	0.568925	1.70678	5.12033	15.361	46.0829	Dorzolamide hydrochloride	CA2	Carbonic Anhydrase Type II Inhibitors	CCN[C@H]1C[C@H](C)[S+]([O-])(=O)C2=C1C=C(S2)[S+](N)([O-])=O
[truncated: 1,068 more rows]

## Sheet: TC32
Sample_ID	name	target	moa	protocol	Sample_data_type	CCLASS	CCLASS2	LAC50	HILL	INF	ZERO	MAXR	NPT	FAUC	TAUC	R2	PHILL	DATA0	DATA1	DATA2	DATA3	DATA4	DATA5	DATA6	DATA7	DATA8	DATA9	DATA10	C0	C1	C2	C3	C4	C5	C6	C7	C8	C9	C10	name	target	moa	smi
[truncated: 1,912 more rows]

## Sheet: EW8
Sample_ID	name	target	moa	protocol	Sample_data_type	CCLASS	CCLASS2	LAC50	HILL	INF	ZERO	MAXR	NPT	FAUC	TAUC	R2	PHILL	DATA0	DATA1	DATA2	DATA3	DATA4	DATA5	DATA6	DATA7	DATA8	DATA9	DATA10	C0	C1	C2	C3	C4	C5	C6	C7	C8	C9	C10	name	target	moa	smi
[truncated: 1,912 more rows]

[truncated: 1 more sheets: RDES]
