# Supplementary material for: Matrix Screen Identifies Synergistic Combination of PARP Inhibitors and Nicotinamide Phosphoribosyltransferase (NAMPT) Inhibitors in Ewing Sarcoma
Source: Oxford University Press journal article supplement (doi:10.1158/1078-0432.ccr-17-1121), 2017-09-12
Supplement: 10780432ccr171121-sup-182099_3_supp_4237861_mvmhdf.xlsx [file 10780432ccr171121-sup-182099_3_supp_4237861_mvmhdf.xlsx]

## Sheet: Sheet1
	RPMA outcomes ranked from decreased expression (negative value) to increased expression (positive value) relative to DMSO control.
	6 hour treatment w/Niraparib (5 μM)		6 hour treatment w/Daporinad (5 nM)		6 hour treatment w/N. and D. combination		24 hour treatment w/Niraparib (5 μM)		24 hour treatment w/Daporinad (5 nM)		24 hour treatment w/N. and D. combination
	Analyte	QMN score	Analyte	QMN score	Analyte	QMN score	Analyte	QMN score	Analyte	Ave. QMN score	Analyte	QMN score
	Vimentin	-0.569029	Vimentin	-0.446013	MARCKS S152 156	-0.595184	Vimentin	-0.643332	4ebp1 S65	-1.54869	Vimentin	-0.71258
	pCTD RNA Poly II S2	-0.415302	cRaf	-0.344368	LKB1 S334	-0.404665	MARCKS S152 156	-0.546982	Cofilin S3	-1.02686	Catenin beta	-0.680936
	p27 T187	-0.380563	pCTD RNA Poly II S2	-0.31151	Vimentin	-0.40244	Catenin beta S33 37 T41	-0.525487	eNOS S116	-0.61802	pCTD RNA Poly II S2	-0.538293
	PARP cleaved D214	-0.34674	ERK 1 2 T202 Y204	-0.310138	ERK 1 2 T202 Y204	-0.342829	pCTD RNA Poly II S2	-0.508321	4ebp1 T70	-0.61525	eNOS S116	-0.537375
	LKB1 S334	-0.336691	LKB1 S334	-0.307931	eNOS S116	-0.32942	p90RSK S380	-0.470709	pCTD RNA Poly II S2	-0.550833	Heme Oxygenase 1	-0.503895
	ERK 1 2 T202 Y204	-0.333078	Catenin beta S33 37 T41	-0.251719	Bcl 2 S70	-0.306914	Heme Oxygenase 1	-0.450792	4ebp1 T37 46	-0.549368	Notch1	-0.438494
	cRaf	-0.320482	Bcl 2 S70	-0.24851	eNOSS1177	-0.249759	PKC pan beta II S660	-0.448175	Sox2	-0.433985	Bcl2	-0.397058
	eNOS S116	-0.305903	eNOS	-0.231528	CD20	-0.230084	eNOSS1177	-0.4463	Catenin beta	-0.421972	4ebp1 S65	-0.373892
	p90RSK S380	-0.278738	SmacDiablo	-0.218709	p27 T187	-0.226565	NDRG1 S330	-0.441028	cMyc	-0.404736	4ebp1 T37 46	-0.36554
	E Cadherin	-0.275528	E Cadherin	-0.212287	Catenin beta S33 37 T41	-0.223512	eNOS S116	-0.414987	Catenin beta S33 37 T41	-0.383487	SmacDiablo	-0.351708
	Ki67	-0.251522	Fibronectin	-0.206413	pCTD RNA Poly II S2	-0.217715	Bcl 2 S70	-0.41079	Heme Oxygenase 1	-0.380972	cMyc	-0.316061
	Catenin beta S33 37 T41	-0.246232	AMPK beta1 S108	-0.205615	Ki67	-0.207726	eNOS	-0.389197	Bcl 2 S70	-0.355255	Catenin beta S33 37 T41	-0.301197
	Catenin beta T41 S45	-0.236906	Cleaved Caspase 7 D198	-0.204074	eNOS	-0.194704	eNOSS113	-0.361329	p38 MAP Kinase	-0.337792	LKB1 S334	-0.2954
	Bcl 2 S70	-0.235115	Notch1	-0.191922	Catenin beta T41 S45	-0.182323	Catenin beta T41 S45	-0.35507	eNOSS113	-0.309121	PAK1 S199 204 PAK2 S192 197	-0.288292
	eNOS	-0.223758	Catenin beta	-0.189172	eNOSS113	-0.180048	Catenin beta	-0.330583	eNOSS1177	-0.306715	p27 T187	-0.287101
	Catenin beta	-0.221827	Cleaved Caspase 3 D175	-0.186282	4ebp1 T37 46	-0.174781	iNOS	-0.307991	cRaf	-0.30039	E Cadherin	-0.269199
	Fibronectin	-0.216111	p21	-0.186217	SmacDiablo	-0.167195	p27 T187	-0.306346	p90RSK S380	-0.296444	eNOS	-0.241676
	eNOSS113	-0.212928	Heme Oxygenase 1	-0.18283	Cofilin S3	-0.154963	4ebp1 S65	-0.286643	PAK1	-0.296165	MARCKS S152 156	-0.239657
	SmacDiablo	-0.209219	PARP cleaved D214	-0.176915	iNOS	-0.15388	NFkappaBp105S933	-0.227085	ERK 1 2 T202 Y204	-0.248792	Cofilin S3	-0.228963
	PKC pan beta II S660	-0.203202	iNOS	-0.16004	IkappaBaS32	-0.146336	IkappaBaS32	-0.21901	LKB1 S334	-0.239966	Ephrin B Y324 329	-0.223026
	PAK4	-0.193516	eNOSS113	-0.159564	Cleaved Caspase 3 D175	-0.126403	PAK1 S199 204 PAK2 S192 197	-0.184162	Notch1	-0.237648	Sox2	-0.209687
	MAPKAPK2 T334	-0.188049	PAK4	-0.158336	E Cadherin	-0.11848	4ebp1 T70	-0.172788	p27 T187	-0.229103	4ebp1 T70	-0.20738
	eNOSS1177	-0.184879	Catenin beta T41 S45	-0.156305	NFkappaBp65S536	-0.112908	cRaf	-0.167352	eNOS	-0.222863	eNOSS113	-0.205114
	PKR T446	-0.168046	p90RSK S380	-0.146457	Ephrin B Y324 329	-0.105649	CD20	-0.165811	PKC Alpha	-0.222674	eNOSS1177	-0.20479
	iNOS	-0.165366	eNOS S116	-0.146362	PARP cleaved D214	-0.100395	4ebp1 T37 46	-0.164591	Caspase 9	-0.215762	Bcl 2 S70	-0.204059
	Heme Oxygenase 1	-0.164391	IkappaBaS32	-0.142422	Heme Oxygenase 1	-0.0987303	LKB1 S334	-0.144924	Ephrin B Y324 329	-0.213553	AMPK beta1 S108	-0.196943
	MARCKS S152 156	-0.162402	ATF2 T69 71	-0.138402	4ebp1 T70	-0.0936617	ERK 1 2 T202 Y204	-0.133996	Catenin beta T41 S45	-0.211872	EphA2	-0.153115
	NDRG1	-0.161596	eNOSS1177	-0.137547	p21	-0.0905133	E Cadherin	-0.120684	iNOS	-0.207278	Mcl1	-0.152613
	Notch1	-0.153223	NDRG1	-0.137037	LKB1 S428	-0.0889621	AMPK beta1 S108	-0.11925	NDRG1	-0.206615	NDRG1	-0.150558
	NFkappaB p65 S276	-0.150028	Cleaved Caspase 9 D315	-0.129881	NFkappaBp105S933	-0.0862225	EphB2	-0.119247	mTOR	-0.19809	PAK4	-0.145361
	Cleaved Caspase 3 D175	-0.149874	Raptor	-0.125713	Notch1	-0.0852129	Notch1	-0.112947	IkappaBaS32	-0.194317	Ezrin T567 Radixin T564 Moesin T558	-0.141674
	IkappaBaS32	-0.149405	Ephrin B Y324 329	-0.123082	HSP90	-0.0831894	NFkappaBp65S536	-0.111024	Vimentin	-0.185275	HIF1 Alpha	-0.133452
	AMPK beta1 S108	-0.147111	EphB1	-0.120339	FAK Y397	-0.0795265	Ephrin B Y324 329	-0.105844	E Cadherin	-0.170221	Ezrin Y353	-0.132034
	EphB2	-0.147062	N Cadherin	-0.118161	cRaf	-0.0768144	SPARC	-0.0973496	MARCKS S152 156	-0.166545	Bcl xL	-0.130906
	Cleaved Caspase 9 D315	-0.135904	PKR T446	-0.117351	4ebp1	-0.0766628	4ebp1	-0.0932854	EphA2	-0.158259	IkappaBaS32	-0.129735
	Bcl2 T56	-0.134545	mTOR S2448	-0.1166	ATF2 T69 71	-0.0763215	Numb	-0.091138	PKC pan beta II S660	-0.153793	mTOR	-0.117942
	Cleaved Caspase 7 D198	-0.130762	MAPKAPK2 T334	-0.116213	IkappaBaS3236	-0.0746501	cMyc	-0.0870955	NFkappaBp65	-0.151962	4ebp1	-0.116769
	mTOR S2448	-0.126827	EphB2	-0.114777	Numb	-0.0703283	FAK Y397	-0.0810261	PAK4	-0.148735	p21	-0.111765
	NDRG1 S330	-0.126145	Geminin	-0.111911	EphB1	-0.0663383	cRaf S338	-0.0780117	PAK1 S199 204 PAK2 S192 197	-0.144829	mTOR S2448	-0.110668
	ATF2 T69 71	-0.124221	Ki67	-0.111504	Caspase 3	-0.0590806	NFkappaBp65	-0.0724248	MAPKAPK2	-0.135977	MAPKAPK2	-0.10333
	EphB1	-0.114697	CD20	-0.109945	NDRG1	-0.0584728	Cofilin S3	-0.0711417	Bcl2	-0.135517	Catenin beta T41 S45	-0.103134
	HIF1 Alpha	-0.114377	HIF1 Alpha	-0.107312	Catenin beta	-0.0571678	Sox2	-0.0671526	LKB1 S428	-0.130314	Musashi	-0.101583
	4ebp1 T37 46	-0.114358	NFkappaB p65 S276	-0.097808	AMPK beta1 S108	-0.0564456	LKB1 S428	-0.0667216	mTOR S2481	-0.128776	cRaf	-0.0989784
	Acetyl NFkappaB p65 Lys310	-0.113019	MARCKS S152 156	-0.0975341	PAK1 S199 204 PAK2 S192 197	-0.0519721	FAK	-0.0275603	mTOR S2448	-0.11932	N Cadherin	-0.097325
	NFkappaBp105S933	-0.111737	ASK1 S83	-0.0932694	EphB2	-0.0519685	PAK4	-0.025786	Cleaved Caspase 9 D315	-0.117985	Smad2 S465 467 Smad3 S423 425	-0.0930715
	Ephrin B Y324 329	-0.111502	mTOR S2481	-0.0910842	NDRG1 S330	-0.0426368	p38 MAP Kinase	-0.0226797	EphB2	-0.11787	EPHA4	-0.0851286
	Bcl xL	-0.111097	4ebp1 T37 46	-0.0905871	NFkappaBp65	-0.0406948	ASK1 S83	-0.0224329	NFkappaBp105S933	-0.117411	iNOS	-0.0808021
	EphA2	-0.109908	Acetyl NFkappaB p65 Lys310	-0.0835025	PAK4	-0.0359879	Raptor	-0.0115358	PKM2	-0.116709	MAPKAPK2 T334	-0.0773642
	Raptor	-0.106403	Bcl2	-0.0824851	HIF1 Alpha	-0.0334254	SmacDiablo	-0.0107705	NFkappaBp65S536	-0.113285	FAK	-0.0764577
	Cofilin S3	-0.106204	Musashi	-0.0803295	RhoA	-0.0304616	ERK 1 2	-0.00766884	LDHA LDHC	-0.112977	ASK1 S83	-0.0754425
	ATF2 T71	-0.0979699	Cleaved Caspase 9 D330	-0.0793012	p38 MAP Kinase	-0.026983	RhoA	-0.00120602	ERK 1 2	-0.107377	CD45	-0.0741804
	NFkappaBp65S536	-0.0849048	Mcl1	-0.0785872	PAK1	-0.0238353	EphB1	0.00329023	Bcl xL	-0.106971	EphB2	-0.074159
	EPHA4	-0.0787265	mTOR	-0.0690803	Aldehyde Dehydrogenase	-0.0186476	Ezrin T567 Radixin T564 Moesin T558	0.00568485	Cleaved Caspase 3 D175	-0.10313	p90RSK S380	-0.073637
	p21	-0.0781557	LKB1 S428	-0.0664018	Caspase 8	-0.0184006	Acetyl NFkappaB p65 Lys310	0.0123202	Raptor	-0.0971116	mTOR S2481	-0.0736006
	N Cadherin	-0.0744419	NFkappaBp65S536	-0.0645265	Cleaved Caspase 7 D198	-0.0129847	p21	0.0158098	Smad2 S465 467 Smad3 S423 425	-0.0944859	p38 MAP Kinase	-0.0714471
	CD20	-0.0721499	Bcl2 T56	-0.0623348	PKC pan beta II S660	-0.00996513	Musashi	0.0202014	Mcl1	-0.0884822	Bcl2 T56	-0.0688494
	Musashi	-0.0695472	FAK Y397	-0.061983	SAPK JNK T183 Y185	-0.00829713	NDRG1	0.0214023	FAK Y397	-0.0763663	LKB1	-0.0619098
	Bcl2	-0.0688402	PKC pan beta II S660	-0.0505284	Cleaved Caspase 9 D330	-0.00418869	Cleaved Caspase 9 D315	0.0257183	N Cadherin	-0.0748023	Acetyl NFkappaB p65 Lys310	-0.0610166
	FAK Y397	-0.0623121	EphA2	-0.0499184	Cleaved Caspase 9 D315	-0.00269241	mTOR S2481	0.0263553	cRaf S338	-0.072666	Raptor	-0.0596642
	mTOR S2481	-0.0584554	cRaf S338	-0.0441014	Mcl1	-0.00207664	Bcl2 T56	0.0278977	HIF1 Alpha	-0.0704526	Numb	-0.0564615
	Caspase 3	-0.0571364	PKC Alpha	-0.0376345	Caspase 7	-0.00105645	AMPK alpha1 S485	0.0302505	FAK	-0.0686452	MARCKS	-0.0556287
	Survivin	-0.0551793	Histone H2AX S139	-0.0376122	Geminin	-0.00084038	mTOR S2448	0.0311503	SPARC	-0.0656813	SPARC	-0.0547957
	RhoA	-0.0533353	Caspase 9	-0.0360236	Acetyl NFkappaB p65 Lys310	0.00229586	mTOR	0.0386898	Bcl2 T56	-0.0644488	ERK 1 2 T202 Y204	-0.0464991
	SPARC	-0.0528088	Bcl xL	-0.0352187	p38 MAP Kin T180 Y182	0.0024849	CD45	0.0408445	Catenin Beta S552	-0.0628335	NFkappaB p65 S276	-0.0427823
	4ebp1 T70	-0.0518801	NDRG1 S330	-0.0349302	4ebp1 S65	0.00266173	Bcl2	0.0417642	CD20	-0.0621947	FAK Y397	-0.0367078
	LKB1	-0.0515418	4ebp1 T70	-0.0316497	ERK 1 2	0.00269692	Ezrin Y353	0.0424999	ASK1 S83	-0.0555012	NFkappaBp65S536	-0.0288761
	Geminin	-0.0484124	Caspase 3	-0.0300002	ASK1 S83	0.00495576	Mcl1	0.0462391	Caspase 7	-0.0520654	NFkappaBp65	-0.0165519
	Cleaved Caspase 9 D330	-0.0461621	Numb	-0.0269441	NFkappaB p65 S276	0.00607795	MAPKAPK2 T334	0.0573412	MAPKAPK2 T334	-0.051396	PKC Alpha	-0.011528
	Histone H2AX S139	-0.0442872	Caspase 8	-0.0261372	Bcl2 T56	0.00714125	PKC Alpha	0.0671373	LKB1	-0.0513779	AMPK alpha1 S485	-0.0108597
	Ezrin Y353	-0.0441063	MARCKS	-0.0260019	mTOR S2448	0.0134104	NFkappaB p65 S276	0.0699235	Geminin	-0.0511663	Eph Receptor A5	-0.00268526
	ASK1 S83	-0.0422488	FAK	-0.0229887	Bcl xL	0.0135975	Raptor S792	0.070317	4ebp1	-0.0476166	Fibronectin	-0.00213692
	mTOR	-0.0400568	p38 MAP Kinase	-0.0202755	mTOR	0.0168739	N Cadherin	0.0751809	RhoA	-0.0422964	NDRG1 S330	0.0112099
	HSP90	-0.0399646	IkappaBaS3236	-0.0199122	SPARC	0.0262097	Catenin Beta S552	0.0898495	Numb	-0.0294328	FAK Y576 577	0.02405
	PAK1 S199 204 PAK2 S192 197	-0.0399624	SMAD 2 3	-0.0127203	MAPKAPK2 T334	0.0296593	Cleaved Caspase 9 D330	0.0900142	Acetyl NFkappaB p65 Lys310	-0.02101	Caspase 9	0.0267345
	4ebp1 S65	-0.0344816	FAK Y576 577	-0.011897	Ezrin Y353	0.0320291	Bcl xL	0.0922552	Caspase 3	-0.0199307	RhoA	0.0267917
	p38 MAP Kin T180 Y182	-0.0319174	LKB1	-0.00825129	Musashi	0.0325423	PKR T446	0.103261	Ezrin T567 Radixin T564 Moesin T558	-0.0193786	LKB1 S428	0.0288744
	Eph Receptor A5	-0.0280557	NFkappaBp65	-0.00351763	FAK	0.0339796	SMAD 2 3	0.103821	p21	-0.015001	CD20	0.0296837
	LKB1 S428	-0.0266617	RhoA	-0.00293098	N Cadherin	0.040661	HIF1 Alpha	0.116495	CD45	-0.00310651	ERK 1 2	0.0326212
	p38 MAP Kinase	-0.0256045	Ezrin Y353	-0.00153576	AMPK alpha1 S485	0.0442263	IkappaBaS3236	0.119213	NDRG1 S330	-0.001689	EphB1	0.0357846
	IkappaBaS3236	-0.0245183	Survivin	-0.000776281	Raptor	0.0450802	EphA2	0.122417	AMPK alpha1 S485	-0.000754943	IkappaBaS3236	0.036367
	SMAD 2 3	-0.0221562	SAPK JNK T183 Y185	-0.000620475	HSP70	0.0465818	SAPK JNK	0.124664	GAPDH	0.00899429	Ki67	0.038766
	Raptor S792	-0.0201224	p38 MAP Kin T180 Y182	0.000382439	ATF2 T71	0.0467587	FAK Y576 577	0.126811	Musashi	0.0107149	SMAD 2 3	0.0511477
	Numb	-0.0156434	HSP90	0.00050107	LKB1	0.0485404	LKB1	0.133499	Cleaved Caspase 9 D330	0.0120644	PKC pan beta II S660	0.0522899
	Mcl1	-0.0134025	Chk1 S345	0.00050279	Caspase 9	0.0531485	p38 MAP Kin T180 Y182	0.145464	Cofilin	0.0169215	Geminin	0.0646234
	cRaf S338	-0.00821955	Caspase 7	0.0051196	mTOR S2481	0.0591276	EPHA4	0.14563	PKR T446	0.0192749	NFkappaBp105S933	0.0652072
	CD45	-0.00793513	AMPK alpha1 S485	0.00677754	PKC Alpha	0.0611614	PAK1	0.146012	p38 MAP Kin T180 Y182	0.0244708	EphA3	0.0765811
	Caspase 9	-0.00763184	Raptor S792	0.00920484	EPHA4	0.064899	Caspase 9	0.154527	EphA3	0.0270721	Caspase 8	0.0814565
	Caspase 7	-0.0058953	EPHA4	0.00989216	SMAD 2 3	0.0666825	MAPKAPK2	0.15534	SmacDiablo	0.0382517	PAK4 S474	0.0884161
	EphA3	-0.00283551	Sox2	0.0110501	MAPKAPK2	0.0697977	Aldehyde Dehydrogenase	0.159412	Caspase 8	0.0448153	Raptor S792	0.0899361
	Sox2	0.000403415	CD45	0.0131287	Ezrin T567 Radixin T564 Moesin T558	0.0714645	Smad2 S465 467 Smad3 S423 425	0.160574	EphB1	0.0510924	HSP70	0.0943358
	NFkappaBp65	0.0024018	4ebp1	0.0138447	Cleaved Caspase 8 D391	0.0776846	HSP90	0.162222	SAPK JNK	0.0527632	cRaf S338	0.0996806
	SAPK JNK T183 Y185	0.00289294	ATF2 T71	0.019148	CD45	0.0779206	HSP70	0.162685	Ezrin Y353	0.059391	PAK1	0.113447
	Ezrin T567 Radixin T564 Moesin T558	0.00411877	ERK 1 2	0.0248296	PKR T446	0.0803496	EphA3	0.189893	HSP70	0.0686131	Aldehyde Dehydrogenase	0.128397
	FAK	0.00482978	PAK1	0.026983	ATP Citrate Lyase S455	0.0866457	Eph Receptor A5	0.191375	Eph Receptor A5	0.0768624	Cleaved Caspase 9 D330	0.133525
	MARCKS	0.0120762	cMyc	0.0292463	EphA2	0.091509	Fibronectin	0.193814	IkappaBaS3236	0.0893397	Catenin Beta S552	0.148398
	MAPKAPK2	0.0141991	SPARC	0.0297937	HSP27 S15	0.0916596	Acetyl CoA Carboxylase S79	0.198225	NFkappaB p65 S276	0.100444	PKR T446	0.15762
	PKC Alpha	0.0189557	Smad2 S465 467 Smad3 S423 425	0.0316514	MARCKS	0.0917587	Ki67	0.199303	FAK Y576 577	0.103738	SAPK JNK	0.163705
	FAK Y576 577	0.0275053	EphA3	0.0347375	Eph Receptor A5	0.0950961	Caspase 7	0.208099	ATP Citrate Lyase S455	0.115035	Cleaved Caspase 9 D315	0.185627
	Cofilin	0.0310643	MAPKAPK2	0.0475548	p90RSK S380	0.0985836	PAK4 S474	0.21601	EPHA4	0.126578	Caspase 7	0.208621
	Caspase 8	0.0333225	Cleaved Caspase 8 D391	0.0487754	cMyc	0.100074	Caspase 8	0.218387	Survivin	0.137592	GAPDH	0.23224
	PAK1	0.0353648	Ezrin T567 Radixin T564 Moesin T558	0.0517025	Histone H2AX S139	0.100244	Caspase 3	0.220043	Histone H2AX S139	0.141022	Survivin	0.249061
	ERK 1 2	0.0518458	Cofilin S3	0.0517027	EphA3	0.101955	Survivin	0.230823	SMAD 2 3	0.144809	LDHA LDHC	0.258209
	4ebp1	0.0637247	HSP70	0.0649909	HSP90 B1	0.103394	Cleaved Caspase 3 D175	0.232935	HSP90 B1	0.145259	HSP90	0.29815
	AMPK alpha1 S485	0.0701019	PAK1 S199 204 PAK2 S192 197	0.0696533	PAK4 S474	0.104097	LDHA LDHC	0.235742	SAPK JNK T183 Y185	0.147342	Caspase 3	0.333015
	cMyc	0.0708442	4ebp1 S65	0.0696615	Bcl2	0.108549	MARCKS	0.26117	Cleaved Caspase 8 D391	0.147437	Cofilin	0.349139
	HSP70	0.0789572	Eph Receptor A5	0.0712195	Raptor S792	0.113216	PKM2	0.292669	MARCKS	0.165075	PKM2	0.38222
	Smad2 S465 467 Smad3 S423 425	0.0934764	NFkappaBp105S933	0.0715686	PKM2	0.122825	HSP27 S15	0.302664	Aldehyde Dehydrogenase	0.173291	HSP90 B1	0.411584
	HSP90 B1	0.105368	ATP Citrate Lyase S455	0.0778649	FAK Y576 577	0.134589	HSP90 B1	0.312516	PAK4 S474	0.190248	Acetyl CoA Carboxylase S79	0.596885
	LDHA LDHC	0.10893	Aldehyde Dehydrogenase	0.0823711	Smad2 S465 467 Smad3 S423 425	0.140444	SAPK JNK T183 Y185	0.313673	HSP90	0.194398	HSP27 S15	0.64297
	Cleaved Caspase 8 D391	0.121253	p27 T187	0.0836931	LDHA LDHC	0.143216	ATF2 T69 71	0.318206	AMPK beta1 S108	0.194753	ATF2 T69 71	0.671872
	HSP27 S15	0.133777	LDHA LDHC	0.0976674	Survivin	0.143577	Cofilin	0.344754	Raptor S792	0.196821	Histone H2AX S139	0.682458
	Aldehyde Dehydrogenase	0.133937	PKM2	0.0996236	Catenin Beta S552	0.148225	Geminin	0.34496	Chk1 S345	0.21625	Cleaved Caspase 3 D175	0.709896
	Catenin Beta S552	0.154262	HSP27 S15	0.103958	cRaf S338	0.170055	GAPDH	0.383658	Fibronectin	0.336569	ATP Citrate Lyase S455	0.753085
	GAPDH	0.160717	HSP90 B1	0.106748	SAPK JNK	0.180459	ATP Citrate Lyase S455	0.423509	HSP27 S15	0.338297	Cleaved Caspase 8 D391	0.865404
	PKM2	0.161311	Catenin Beta S552	0.129261	Acetyl CoA Carboxylase S79	0.182782	Cleaved Caspase 8 D391	0.458849	Ki67	0.351091	p38 MAP Kin T180 Y182	1.32502
	Chk1 S345	0.202	SAPK JNK	0.149014	Sox2	0.206594	Histone H2AX S139	0.530792	ATF2 T69 71	0.359155	ATF2 T71	1.3314
	PAK4 S474	0.211881	Cofilin	0.15168	Cofilin	0.218026	ATF2 T71	0.761874	Acetyl CoA Carboxylase S79	0.553387	SAPK JNK T183 Y185	1.59438
	ATP Citrate Lyase S455	0.268051	GAPDH	0.160058	GAPDH	0.247701	Chk1 S345	0.830819	Cleaved Caspase 7 D198	0.689663	Chk1 S345	1.65028
	SAPK JNK	0.277568	PAK4 S474	0.203427	Fibronectin	0.260968	PARP cleaved D214	1.89394	PARP cleaved D214	0.712953	PARP cleaved D214	2.80911
	Acetyl CoA Carboxylase S79	0.33273	Acetyl CoA Carboxylase S79	0.296678	Chk1 S345	0.330883	Cleaved Caspase 7 D198	1.96073	ATF2 T71	0.955793	Cleaved Caspase 7 D198	2.95833
